# Supplementary material for: Soil species sensitivity distributions for terrestrial risk assessment of silver nanomaterials: the influence of nanomaterial characteristics and soil type
Source: Royal Society of Chemistry journal article supplement (doi:10.1039/d4en01102c), 2025-01-01
Supplement: d4en01102c1.xlsx [file d4en01102c1.xlsx]

## Sheet: Database
													initial material description			initial material description		initial material description								initial material description			initial material description			initial material description				initial material description			initial material description			initial material description	initial material description		Description of the exposure medium			Description of the exposure medium
													Material composition													Dry characterization (powder)									Characterization in suspension (in ultrapure water)										General description of exposure medium			Light regime during exposure
Numeric Reference	Data recorder (name)	Type of source	Environment	Lead author	Date	DOI	Title	Reference	Substance formulae - test material	AgNM	Supplier	Material phase	Main constituent chemical	Main constituent chemical CAS number	% main constituent chemical	% impurity	Surface treatment chemical identity	Surface treatment CAS number	Surface treatment % mass	Density g·cm¯³	Average nominal Diameter [nm]	Size	Min size [nm]	Max size [nm]	Analytical technique used by producer	SSA [m2/g]	Shape	Width (nm)	Length (nm)	Aspect ratio	Average Primary particle Diameter (nm)	Analytical technique for primary Particle Diameter	Minimum primary size diameter (nm)	Maximum primary size diameter (nm)	Stock Medium descriptor	Sonication used for dispersion	Hydrodynamic eq sphere diameter (nm)	Metric for hydrodynamic eq sphere diameter	Analytical technique for hydrodynamic sphere Diameter	Minimum hydrodynamic diameter (nm)	Maximum maximum hydrodynamic diameter (nm)	Polydispersity index	Surface Charge in ultrapure water (mV)	Isoelectric point (pH)	Phase of exposure (liquid or solid)	Artificial or natural media	Standard artificial media ID	Light condition	Hours illuminated per 24 hour cycle
1	SR	Article	Soil	Bicho	2016	10.1016/j.jhazmat.2016.07.040	Effects of Ag nanomaterials and Ag salt can be discriminated in a full life cycle long term test with Enchytraeus cryoticus	Bicho et al 2016 Effects of Ag nanomaterials and Ag salt can be discriminated in a full life cycle long term test with Enchytraeus cryoticus. Journal of Hazardous Materials 318, 608–614.	NM300K	AgNM	JRC	Suspension	Ag	*	*	89.8	Tween	9005-70-3	8% (4% each)	*	15	Below 20	*	*	TEM	*	Spheroidal	*	*	*	17	TEM	9	25	MilliQ Water and 10.2% of Ag in suspension	*	52.31	Mean	NTA	*	*	*	*	*	Solid	Natural media	LUFA 2.2	Light	16
2	SR	Article	Soil	Bicho	2016	10.1016/j.jhazmat.2016.07.040	Effects of Ag nanomaterials and Ag salt can be discriminated in a full life cycle long term test with Enchytraeus cryoticus	Bicho et al 2016 Effects of Ag nanomaterials and Ag salt can be discriminated in a full life cycle long term test with Enchytraeus cryoticus. Journal of Hazardous Materials 318, 608–614 .	NM300K	AgNM	JRC	Suspension	Ag	*	*	89.8	Tween	9005-70-3	8% (4% each)	*	15	Below 20	*	*	TEM	*	Spheroidal	*	*	*	17	TEM	9	25	MilliQ Water and 10.2% of Ag in suspension	*	52.31	Mean	NTA	*	*	*	*	*	Solid	Natural media	LUFA 2.2	Light	16
3	SR	Article	Soil	Bicho	2016	10.1016/j.jhazmat.2016.07.040	Effects of Ag nanomaterials and Ag salt can be discriminated in a full life cycle long term test with Enchytraeus cryoticus	Bicho et al 2016 Effects of Ag nanomaterials and Ag salt can be discriminated in a full life cycle long term test with Enchytraeus cryoticus. Journal of Hazardous Materials 318, 608–614 .	NM300K	AgNM	JRC	Suspension	Ag	*	*	89.8	Tween	9005-70-3	8% (4% each)	*	15	Below 20	*	*	TEM	*	Spheroidal	*	*	*	17	TEM	9	25	MilliQ Water and 10.2% of Ag in suspension	*	52.31	Mean	NTA	*	*	*	*	*	Solid	Natural media	LUFA 2.2	Light	16
4	SR	Article	Soil	Bicho	2016	10.1016/j.jhazmat.2016.07.040	Effects of Ag nanomaterials and Ag salt can be discriminated in a full life cycle long term test with Enchytraeus cryoticus	Bicho et al 2016 Effects of Ag nanomaterials and Ag salt can be discriminated in a full life cycle long term test with Enchytraeus cryoticus. Journal of Hazardous Materials 318, 608–614 .	NM300K	AgNM	JRC	Suspension	Ag	*	*	89.8	Tween	9005-70-3	8% (4% each)	*	15	Below 20	*	*	TEM	*	Spheroidal	*	*	*	17	TEM	9	25	MilliQ Water and 10.2% of Ag in suspension	*	52.31	Mean	NTA	*	*	*	*	*	Solid	Natural media	LUFA 2.2	Light	16
5	SR	Article	Soil	Bicho	2016	10.1016/j.jhazmat.2016.07.040	Effects of Ag nanomaterials and Ag salt can be discriminated in a full life cycle long term test with Enchytraeus cryoticus	Bicho et al 2016 Effects of Ag nanomaterials and Ag salt can be discriminated in a full life cycle long term test with Enchytraeus cryoticus. Journal of Hazardous Materials 318, 608–614 .	NM300K	AgNM	JRC	Suspension	Ag	*	*	89.8	Tween	9005-70-3	8% (4% each)	*	15	Below 20	*	*	TEM	*	Spheroidal	*	*	*	17	TEM	9	25	MilliQ Water and 10.2% of Ag in suspension	*	52.31	Mean	NTA	*	*	*	*	*	Solid	Natural media	LUFA 2.2	Light	16
6	SR	Article	Soil	Bicho	2016	10.1016/j.jhazmat.2016.07.040	Effects of Ag nanomaterials and Ag salt can be discriminated in a full life cycle long term test with Enchytraeus cryoticus	Bicho et al 2016 Effects of Ag nanomaterials and Ag salt can be discriminated in a full life cycle long term test with Enchytraeus cryoticus. Journal of Hazardous Materials 318, 608–614 .	NM300K	AgNM	JRC	Suspension	Ag	*	*	89.8	Tween	9005-70-3	8% (4% each)	*	15	Below 20	*	*	TEM	*	Spheroidal	*	*	*	17	TEM	9	25	MilliQ Water and 10.2% of Ag in suspension	*	52.31	Mean	NTA	*	*	*	*	*	Solid	Natural media	LUFA 2.2	Light	16
7	SR	Article	Soil	Bicho	2016	10.1016/j.jhazmat.2016.07.040	Effects of Ag nanomaterials and Ag salt can be discriminated in a full life cycle long term test with Enchytraeus cryoticus	Bicho et al 2016 Effects of Ag nanomaterials and Ag salt can be discriminated in a full life cycle long term test with Enchytraeus cryoticus. Journal of Hazardous Materials 318, 608–614 .	NM300K	AgNM	JRC	Suspension	Ag	*	*	89.8	Tween	9005-70-3	8% (4% each)	*	15	Below 20	*	*	TEM	*	Spheroidal	*	*	*	17	TEM	9	25	MilliQ Water and 10.2% of Ag in suspension	*	52.31	Mean	NTA	*	*	*	*	*	Solid	Natural media	LUFA 2.2	Light	16
8	SR	Article	Soil	Bicho	2016	10.1016/j.jhazmat.2016.07.040	Effects of Ag nanomaterials and Ag salt can be discriminated in a full life cycle long term test with Enchytraeus cryoticus	Bicho et al 2016 Effects of Ag nanomaterials and Ag salt can be discriminated in a full life cycle long term test with Enchytraeus cryoticus. Journal of Hazardous Materials 318, 608–614 .	NM300K	AgNM	JRC	Suspension	Ag	*	*	89.8	Tween	9005-70-3	8% (4% each)	*	15	Below 20	*	*	TEM	*	Spheroidal	*	*	*	17	TEM	9	25	MilliQ Water and 10.2% of Ag in suspension	*	52.31	Mean	NTA	*	*	*	*	*	Solid	Natural media	LUFA 2.2	Light	16
9	SR	Article	Soil	Bicho	2016	10.1016/j.jhazmat.2016.07.040	Effects of Ag nanomaterials and Ag salt can be discriminated in a full life cycle long term test with Enchytraeus cryoticus	Bicho et al 2016 Effects of Ag nanomaterials and Ag salt can be discriminated in a full life cycle long term test with Enchytraeus cryoticus. Journal of Hazardous Materials 318, 608–614 .	NM300K	AgNM	JRC	Suspension	Ag	*	*	89.8	Tween	9005-70-3	8% (4% each)	*	15	Below 20	*	*	TEM	*	Spheroidal	*	*	*	17	TEM	9	25	MilliQ Water and 10.2% of Ag in suspension	*	52.31	Mean	NTA	*	*	*	*	*	Solid	Natural media	LUFA 2.2	Light	16
10	SR	Article	Soil	Bicho	2016	10.1016/j.jhazmat.2016.07.040	Effects of Ag nanomaterials and Ag salt can be discriminated in a full life cycle long term test with Enchytraeus cryoticus	Bicho et al 2016 Effects of Ag nanomaterials and Ag salt can be discriminated in a full life cycle long term test with Enchytraeus cryoticus. Journal of Hazardous Materials 318, 608–614 .	NM300K	AgNM	JRC	Suspension	Ag	*	*	89.8	Tween	9005-70-3	8% (4% each)	*	15	Below 20	*	*	TEM	*	Spheroidal	*	*	*	17	TEM	9	25	MilliQ Water and 10.2% of Ag in suspension	*	52.31	Mean	NTA	*	*	*	*	*	Solid	Natural media	LUFA 2.2	Light	16
11	SR	Article	Soil	Bicho	2016	10.1016/j.jhazmat.2016.07.040	Effects of Ag nanomaterials and Ag salt can be discriminated in a full life cycle long term test with Enchytraeus cryoticus	Bicho et al 2016 Effects of Ag nanomaterials and Ag salt can be discriminated in a full life cycle long term test with Enchytraeus cryoticus. Journal of Hazardous Materials 318, 608–614 .	NM300K	AgNM	JRC	Suspension	Ag	*	*	89.8	Tween	9005-70-3	8% (4% each)	*	15	Below 20	*	*	TEM	*	Spheroidal	*	*	*	17	TEM	9	25	MilliQ Water and 10.2% of Ag in suspension	*	52.31	Mean	NTA	*	*	*	*	*	Solid	Natural media	LUFA 2.2	Light	16
12	SR	Article	Soil	Bicho	2016	10.1016/j.jhazmat.2016.07.040	Effects of Ag nanomaterials and Ag salt can be discriminated in a full life cycle long term test with Enchytraeus cryoticus	Bicho et al 2016 Effects of Ag nanomaterials and Ag salt can be discriminated in a full life cycle long term test with Enchytraeus cryoticus. Journal of Hazardous Materials 318, 608–614 .	NM300K	AgNM	JRC	Suspension	Ag	*	*	89.8	Tween	9005-70-3	8% (4% each)	*	15	Below 20	*	*	TEM	*	Spheroidal	*	*	*	17	TEM	9	25	MilliQ Water and 10.2% of Ag in suspension	*	52.31	Mean	NTA	*	*	*	*	*	Solid	Natural media	LUFA 2.2	Light	16
13	SR	Article	Soil	Bicho	2016	10.1016/j.jhazmat.2016.07.040	Effects of Ag nanomaterials and Ag salt can be discriminated in a full life cycle long term test with Enchytraeus cryoticus	Bicho et al 2016 Effects of Ag nanomaterials and Ag salt can be discriminated in a full life cycle long term test with Enchytraeus cryoticus. Journal of Hazardous Materials 318, 608–614 .	NM300K	AgNM	JRC	Suspension	Ag	*	*	89.8	Tween	9005-70-3	8% (4% each)	*	15	Below 20	*	*	TEM	*	Spheroidal	*	*	*	17	TEM	9	25	MilliQ Water and 10.2% of Ag in suspension	*	52.31	Mean	NTA	*	*	*	*	*	Solid	Natural media	LUFA 2.2	Light	16
14	SR	Article	Soil	Bicho	2016	10.1016/j.jhazmat.2016.07.040	Effects of Ag nanomaterials and Ag salt can be discriminated in a full life cycle long term test with Enchytraeus cryoticus	Bicho et al 2016 Effects of Ag nanomaterials and Ag salt can be discriminated in a full life cycle long term test with Enchytraeus cryoticus. Journal of Hazardous Materials 318, 608–614 .	NM300K	AgNM	JRC	Suspension	Ag	*	*	89.8	Tween	9005-70-3	8% (4% each)	*	15	Below 20	*	*	TEM	*	Spheroidal	*	*	*	17	TEM	9	25	MilliQ Water and 10.2% of Ag in suspension	*	52.31	Mean	NTA	*	*	*	*	*	Solid	Natural media	LUFA 2.2	Light	16
15	SR	Article	Soil	Bicho	2016	10.1016/j.jhazmat.2016.07.040	Effects of Ag nanomaterials and Ag salt can be discriminated in a full life cycle long term test with Enchytraeus cryoticus	Bicho et al 2016 Effects of Ag nanomaterials and Ag salt can be discriminated in a full life cycle long term test with Enchytraeus cryoticus. Journal of Hazardous Materials 318, 608–614 .	NM300K	AgNM	JRC	Suspension	Ag	*	*	89.8	Tween	9005-70-3	8% (4% each)	*	15	Below 20	*	*	TEM	*	Spheroidal	*	*	*	17	TEM	9	25	MilliQ Water and 10.2% of Ag in suspension	*	52.31	Mean	NTA	*	*	*	*	*	Solid	Natural media	LUFA 2.2	Light	16
16	SR	Article	Soil	Bicho	2016	10.1016/j.jhazmat.2016.07.040	Effects of Ag nanomaterials and Ag salt can be discriminated in a full life cycle long term test with Enchytraeus cryoticus	Bicho et al 2016 Effects of Ag nanomaterials and Ag salt can be discriminated in a full life cycle long term test with Enchytraeus cryoticus. Journal of Hazardous Materials 318, 608–614 .	NM300K	AgNM	JRC	Suspension	Ag	*	*	89.8	Tween	9005-70-3	8% (4% each)	*	15	Below 20	*	*	TEM	*	Spheroidal	*	*	*	17	TEM	9	25	MilliQ Water and 10.2% of Ag in suspension	*	52.31	Mean	NTA	*	*	*	*	*	Solid	Natural media	LUFA 2.2	Light	16
17	SR	Article	Soil	Bicho	2016	10.1016/j.jhazmat.2016.07.040	Effects of Ag nanomaterials and Ag salt can be discriminated in a full life cycle long term test with Enchytraeus cryoticus	Bicho et al 2016 Effects of Ag nanomaterials and Ag salt can be discriminated in a full life cycle long term test with Enchytraeus cryoticus. Journal of Hazardous Materials 318, 608–614 .	NM300K	AgNM	JRC	Suspension	Ag	*	*	89.8	Tween	9005-70-3	8% (4% each)	*	15	Below 20	*	*	TEM	*	Spheroidal	*	*	*	17	TEM	9	25	MilliQ Water and 10.2% of Ag in suspension	*	52.31	Mean	NTA	*	*	*	*	*	Solid	Natural media	LUFA 2.2	Light	16
18	SR	Article	Soil	Bicho	2016	10.1016/j.jhazmat.2016.07.040	Effects of Ag nanomaterials and Ag salt can be discriminated in a full life cycle long term test with Enchytraeus cryoticus	Bicho et al 2016 Effects of Ag nanomaterials and Ag salt can be discriminated in a full life cycle long term test with Enchytraeus cryoticus. Journal of Hazardous Materials 318, 608–614 .	NM300K	AgNM	JRC	Suspension	Ag	*	*	89.8	Tween	9005-70-3	8% (4% each)	*	15	Below 20	*	*	TEM	*	Spheroidal	*	*	*	17	TEM	9	25	MilliQ Water and 10.2% of Ag in suspension	*	52.31	Mean	NTA	*	*	*	*	*	Solid	Natural media	LUFA 2.2	Light	16
19	SR	Article	Soil	Bicho	2016	10.1016/j.jhazmat.2016.07.040	Effects of Ag nanomaterials and Ag salt can be discriminated in a full life cycle long term test with Enchytraeus cryoticus	Bicho et al 2016 Effects of Ag nanomaterials and Ag salt can be discriminated in a full life cycle long term test with Enchytraeus cryoticus. Journal of Hazardous Materials 318, 608–614 .	NM300K	AgNM	JRC	Suspension	Ag	*	*	89.8	Tween	9005-70-3	8% (4% each)	*	15	Below 20	*	*	TEM	*	Spheroidal	*	*	*	17	TEM	9	25	MilliQ Water and 10.2% of Ag in suspension	*	52.31	Mean	NTA	*	*	*	*	*	Solid	Natural media	LUFA 2.2	Light	16
20	SR	Article	Soil	Bicho	2016	10.1016/j.jhazmat.2016.07.040	Effects of Ag nanomaterials and Ag salt can be discriminated in a full life cycle long term test with Enchytraeus cryoticus	Bicho et al 2016 Effects of Ag nanomaterials and Ag salt can be discriminated in a full life cycle long term test with Enchytraeus cryoticus. Journal of Hazardous Materials 318, 608–614 .	NM300K	AgNM	JRC	Suspension	Ag	*	*	89.8	Tween	9005-70-3	8% (4% each)	*	15	Below 20	*	*	TEM	*	Spheroidal	*	*	*	17	TEM	9	25	MilliQ Water and 10.2% of Ag in suspension	*	52.31	Mean	NTA	*	*	*	*	*	Solid	Natural media	LUFA 2.2	Light	16
21	SR	Article	Soil	Bicho	2016	10.1016/j.jhazmat.2016.07.040	Effects of Ag nanomaterials and Ag salt can be discriminated in a full life cycle long term test with Enchytraeus cryoticus	Bicho et al 2016 Effects of Ag nanomaterials and Ag salt can be discriminated in a full life cycle long term test with Enchytraeus cryoticus. Journal of Hazardous Materials 318, 608–614 .	NM300K	AgNM	JRC	Suspension	Ag	*	*	89.8	Tween	9005-70-3	8% (4% each)	*	15	Below 20	*	*	TEM	*	Spheroidal	*	*	*	17	TEM	9	25	MilliQ Water and 10.2% of Ag in suspension	*	52.31	Mean	NTA	*	*	*	*	*	Solid	Natural media	LUFA 2.2	Light	16
22	SR	Article	Soil	Bicho	2016	10.1016/j.jhazmat.2016.07.040	Effects of Ag nanomaterials and Ag salt can be discriminated in a full life cycle long term test with Enchytraeus cryoticus	Bicho et al 2016 Effects of Ag nanomaterials and Ag salt can be discriminated in a full life cycle long term test with Enchytraeus cryoticus. Journal of Hazardous Materials 318, 608–614 .	NM300K	AgNM	JRC	Suspension	Ag	*	*	89.8	Tween	9005-70-3	8% (4% each)	*	15	Below 20	*	*	TEM	*	Spheroidal	*	*	*	17	TEM	9	25	MilliQ Water and 10.2% of Ag in suspension	*	52.31	Mean	NTA	*	*	*	*	*	Solid	Natural media	LUFA 2.2	Light	16
23	SR	Article	Soil	Bicho	2016	10.1016/j.jhazmat.2016.07.040	Effects of Ag nanomaterials and Ag salt can be discriminated in a full life cycle long term test with Enchytraeus cryoticus	Bicho et al 2016 Effects of Ag nanomaterials and Ag salt can be discriminated in a full life cycle long term test with Enchytraeus cryoticus. Journal of Hazardous Materials 318, 608–614 .	NM300K	AgNM	JRC	Suspension	Ag	*	*	89.8	Tween	9005-70-3	8% (4% each)	*	15	Below 20	*	*	TEM	*	Spheroidal	*	*	*	17	TEM	9	25	MilliQ Water and 10.2% of Ag in suspension	*	52.31	Mean	NTA	*	*	*	*	*	Solid	Natural media	LUFA 2.2	Light	16
24	SR	Article	Soil	Bicho	2016	10.1016/j.jhazmat.2016.07.040	Effects of Ag nanomaterials and Ag salt can be discriminated in a full life cycle long term test with Enchytraeus cryoticus	Bicho et al 2016 Effects of Ag nanomaterials and Ag salt can be discriminated in a full life cycle long term test with Enchytraeus cryoticus. Journal of Hazardous Materials 318, 608–614 .	NM300K	AgNM	JRC	Suspension	Ag	*	*	89.8	Tween	9005-70-3	8% (4% each)	*	15	Below 20	*	*	TEM	*	Spheroidal	*	*	*	17	TEM	9	25	MilliQ Water and 10.2% of Ag in suspension	*	52.31	Mean	NTA	*	*	*	*	*	Solid	Natural media	LUFA 2.2	Light	16
25	SR	Article	Soil	Bicho	2016	10.1016/j.jhazmat.2016.07.040	Effects of Ag nanomaterials and Ag salt can be discriminated in a full life cycle long term test with Enchytraeus cryoticus	Bicho et al 2016 Effects of Ag nanomaterials and Ag salt can be discriminated in a full life cycle long term test with Enchytraeus cryoticus. Journal of Hazardous Materials 318, 608–614 .	NM300K	AgNM	JRC	Suspension	Ag	*	*	89.8	Tween	9005-70-3	8% (4% each)	*	15	Below 20	*	*	TEM	*	Spheroidal	*	*	*	17	TEM	9	25	MilliQ Water and 10.2% of Ag in suspension	*	52.31	Mean	NTA	*	*	*	*	*	Solid	Natural media	LUFA 2.2	Light	16
26	SR	Article	Soil	Bicho	2016	10.1016/j.jhazmat.2016.07.040	Effects of Ag nanomaterials and Ag salt can be discriminated in a full life cycle long term test with Enchytraeus cryoticus	Bicho et al 2016 Effects of Ag nanomaterials and Ag salt can be discriminated in a full life cycle long term test with Enchytraeus cryoticus. Journal of Hazardous Materials 318, 608–614 .	NM300K	AgNM	JRC	Suspension	Ag	*	*	89.8	Tween	9005-70-3	8% (4% each)	*	15	Below 20	*	*	TEM	*	Spheroidal	*	*	*	17	TEM	9	25	MilliQ Water and 10.2% of Ag in suspension	*	52.31	Mean	NTA	*	*	*	*	*	Solid	Natural media	LUFA 2.2	Light	16
27	SR	Article	Soil	Bicho	2016	10.1016/j.jhazmat.2016.07.040	Effects of Ag nanomaterials and Ag salt can be discriminated in a full life cycle long term test with Enchytraeus cryoticus	Bicho et al 2016 Effects of Ag nanomaterials and Ag salt can be discriminated in a full life cycle long term test with Enchytraeus cryoticus. Journal of Hazardous Materials 318, 608–614 .	NM300K	AgNM	JRC	Suspension	Ag	*	*	89.8	Tween	9005-70-3	8% (4% each)	*	15	Below 20	*	*	TEM	*	Spheroidal	*	*	*	17	TEM	9	25	MilliQ Water and 10.2% of Ag in suspension	*	52.31	Mean	NTA	*	*	*	*	*	Solid	Natural media	LUFA 2.2	Light	16
28	SR	Article	Soil	Bicho	2016	10.1016/j.jhazmat.2016.07.040	Effects of Ag nanomaterials and Ag salt can be discriminated in a full life cycle long term test with Enchytraeus cryoticus	Bicho et al 2016 Effects of Ag nanomaterials and Ag salt can be discriminated in a full life cycle long term test with Enchytraeus cryoticus. Journal of Hazardous Materials 318, 608–614 .	NM300K	AgNM	JRC	Suspension	Ag	*	*	89.8	Tween	9005-70-3	8% (4% each)	*	15	Below 20	*	*	TEM	*	Spheroidal	*	*	*	17	TEM	9	25	MilliQ Water and 10.2% of Ag in suspension	*	52.31	Mean	NTA	*	*	*	*	*	Solid	Natural media	LUFA 2.2	Light	16
29	SR	Article	Soil	Bicho	2016	10.1016/j.jhazmat.2016.07.040	Effects of Ag nanomaterials and Ag salt can be discriminated in a full life cycle long term test with Enchytraeus cryoticus	Bicho et al 2016 Effects of Ag nanomaterials and Ag salt can be discriminated in a full life cycle long term test with Enchytraeus cryoticus. Journal of Hazardous Materials 318, 608–614 .	NM300K	AgNM	JRC	Suspension	Ag	*	*	89.8	Tween	9005-70-3	8% (4% each)	*	15	Below 20	*	*	TEM	*	Spheroidal	*	*	*	17	TEM	9	25	MilliQ Water and 10.2% of Ag in suspension	*	52.31	Mean	NTA	*	*	*	*	*	Solid	Natural media	LUFA 2.2	Light	16
30	SR	Article	Soil	Bicho	2016	10.1016/j.jhazmat.2016.07.040	Effects of Ag nanomaterials and Ag salt can be discriminated in a full life cycle long term test with Enchytraeus cryoticus	Bicho et al 2016 Effects of Ag nanomaterials and Ag salt can be discriminated in a full life cycle long term test with Enchytraeus cryoticus. Journal of Hazardous Materials 318, 608–614 .	NM300K	AgNM	JRC	Suspension	Ag	*	*	89.8	Tween	9005-70-3	8% (4% each)	*	15	Below 20	*	*	TEM	*	Spheroidal	*	*	*	17	TEM	9	25	MilliQ Water and 10.2% of Ag in suspension	*	52.31	Mean	NTA	*	*	*	*	*	Solid	Natural media	LUFA 2.2	Light	16
31	SR	Article	Soil	Bicho	2016	10.1016/j.jhazmat.2016.07.040	Effects of Ag nanomaterials and Ag salt can be discriminated in a full life cycle long term test with Enchytraeus cryoticus	Bicho et al 2016 Effects of Ag nanomaterials and Ag salt can be discriminated in a full life cycle long term test with Enchytraeus cryoticus. Journal of Hazardous Materials 318, 608–614 .	NM300K	AgNM	JRC	Suspension	Ag	*	*	89.8	Tween	9005-70-3	8% (4% each)	*	15	Below 20	*	*	TEM	*	Spheroidal	*	*	*	17	TEM	9	25	MilliQ Water and 10.2% of Ag in suspension	*	52.31	Mean	NTA	*	*	*	*	*	Solid	Natural media	LUFA 2.2	Light	16
32	SR	Article	Soil	Bicho	2016	10.1016/j.jhazmat.2016.07.040	Effects of Ag nanomaterials and Ag salt can be discriminated in a full life cycle long term test with Enchytraeus cryoticus	Bicho et al 2016 Effects of Ag nanomaterials and Ag salt can be discriminated in a full life cycle long term test with Enchytraeus cryoticus. Journal of Hazardous Materials 318, 608–614 .	NM300K	AgNM	JRC	Suspension	Ag	*	*	89.8	Tween	9005-70-3	8% (4% each)	*	15	Below 20	*	*	TEM	*	Spheroidal	*	*	*	17	TEM	9	25	MilliQ Water and 10.2% of Ag in suspension	*	52.31	Mean	NTA	*	*	*	*	*	Solid	Natural media	LUFA 2.2	Light	16
33	SR	Article	Soil	Bicho	2016	10.1016/j.jhazmat.2016.07.040	Effects of Ag nanomaterials and Ag salt can be discriminated in a full life cycle long term test with Enchytraeus cryoticus	Bicho et al 2016 Effects of Ag nanomaterials and Ag salt can be discriminated in a full life cycle long term test with Enchytraeus cryoticus. Journal of Hazardous Materials 318, 608–614 .	NM300K	AgNM	JRC	Suspension	Ag	*	*	89.8	Tween	9005-70-3	8% (4% each)	*	15	Below 20	*	*	TEM	*	Spheroidal	*	*	*	17	TEM	9	25	MilliQ Water and 10.2% of Ag in suspension	*	52.31	Mean	NTA	*	*	*	*	*	Solid	Natural media	LUFA 2.2	Light	16
34	SR	Article	Soil	Bicho	2016	10.1016/j.jhazmat.2016.07.040	Effects of Ag nanomaterials and Ag salt can be discriminated in a full life cycle long term test with Enchytraeus cryoticus	Bicho et al 2016 Effects of Ag nanomaterials and Ag salt can be discriminated in a full life cycle long term test with Enchytraeus cryoticus. Journal of Hazardous Materials 318, 608–614 .	NM300K	AgNM	JRC	Suspension	Ag	*	*	89.8	Tween	9005-70-3	8% (4% each)	*	15	Below 20	*	*	TEM	*	Spheroidal	*	*	*	17	TEM	9	25	MilliQ Water and 10.2% of Ag in suspension	*	52.31	Mean	NTA	*	*	*	*	*	Solid	Natural media	LUFA 2.2	Light	16
35	SR	Article	Soil	Bicho	2016	10.1016/j.jhazmat.2016.07.040	Effects of Ag nanomaterials and Ag salt can be discriminated in a full life cycle long term test with Enchytraeus cryoticus	Bicho et al 2016 Effects of Ag nanomaterials and Ag salt can be discriminated in a full life cycle long term test with Enchytraeus cryoticus. Journal of Hazardous Materials 318, 608–614 .	NM300K	AgNM	JRC	Suspension	Ag	*	*	89.8	Tween	9005-70-3	8% (4% each)	*	15	Below 20	*	*	TEM	*	Spheroidal	*	*	*	17	TEM	9	25	MilliQ Water and 10.2% of Ag in suspension	*	52.31	Mean	NTA	*	*	*	*	*	Solid	Natural media	LUFA 2.2	Light	16
36	SR	Article	Soil	Bicho	2016	10.1016/j.jhazmat.2016.07.040	Effects of Ag nanomaterials and Ag salt can be discriminated in a full life cycle long term test with Enchytraeus cryoticus	Bicho et al 2016 Effects of Ag nanomaterials and Ag salt can be discriminated in a full life cycle long term test with Enchytraeus cryoticus. Journal of Hazardous Materials 318, 608–614 .	NM300K	AgNM	JRC	Suspension	Ag	*	*	89.8	Tween	9005-70-3	8% (4% each)	*	15	Below 20	*	*	TEM	*	Spheroidal	*	*	*	17	TEM	9	25	MilliQ Water and 10.2% of Ag in suspension	*	52.31	Mean	NTA	*	*	*	*	*	Solid	Natural media	LUFA 2.2	Light	16
37	SR	Article	Soil	Bicho	2016	10.1016/j.jhazmat.2016.07.040	Effects of Ag nanomaterials and Ag salt can be discriminated in a full life cycle long term test with Enchytraeus cryoticus	Bicho et al 2016 Effects of Ag nanomaterials and Ag salt can be discriminated in a full life cycle long term test with Enchytraeus cryoticus. Journal of Hazardous Materials 318, 608–614 .	NM300K	AgNM	JRC	Suspension	Ag	*	*	89.8	Tween	9005-70-3	8% (4% each)	*	15	Below 20	*	*	TEM	*	Spheroidal	*	*	*	17	TEM	9	25	MilliQ Water and 10.2% of Ag in suspension	*	52.31	Mean	NTA	*	*	*	*	*	Solid	Natural media	LUFA 2.2	Light	16
38	SR	Article	Soil	Bicho	2016	10.1016/j.jhazmat.2016.07.040	Effects of Ag nanomaterials and Ag salt can be discriminated in a full life cycle long term test with Enchytraeus cryoticus	Bicho et al 2016 Effects of Ag nanomaterials and Ag salt can be discriminated in a full life cycle long term test with Enchytraeus cryoticus. Journal of Hazardous Materials 318, 608–614 .	NM300K	AgNM	JRC	Suspension	Ag	*	*	89.8	Tween	9005-70-3	8% (4% each)	*	15	Below 20	*	*	TEM	*	Spheroidal	*	*	*	17	TEM	9	25	MilliQ Water and 10.2% of Ag in suspension	*	52.31	Mean	NTA	*	*	*	*	*	Solid	Natural media	LUFA 2.2	Light	16
39	SR	Article	Soil	Bicho	2016	10.1016/j.jhazmat.2016.07.040	Effects of Ag nanomaterials and Ag salt can be discriminated in a full life cycle long term test with Enchytraeus cryoticus	Bicho et al 2016 Effects of Ag nanomaterials and Ag salt can be discriminated in a full life cycle long term test with Enchytraeus cryoticus. Journal of Hazardous Materials 318, 608–614 .	NM300K	AgNM	JRC	Suspension	Ag	*	*	89.8	Tween	9005-70-3	8% (4% each)	*	15	Below 20	*	*	TEM	*	Spheroidal	*	*	*	17	TEM	9	25	MilliQ Water and 10.2% of Ag in suspension	*	52.31	Mean	NTA	*	*	*	*	*	Solid	Natural media	LUFA 2.2	Light	16
40	SR	Article	Soil	Bicho	2016	10.1016/j.jhazmat.2016.07.040	Effects of Ag nanomaterials and Ag salt can be discriminated in a full life cycle long term test with Enchytraeus cryoticus	Bicho et al 2016 Effects of Ag nanomaterials and Ag salt can be discriminated in a full life cycle long term test with Enchytraeus cryoticus. Journal of Hazardous Materials 318, 608–614 .	NM300K	AgNM	JRC	Suspension	Ag	*	*	89.8	Tween	9005-70-3	8% (4% each)	*	15	Below 20	*	*	TEM	*	Spheroidal	*	*	*	17	TEM	9	25	MilliQ Water and 10.2% of Ag in suspension	*	52.31	Mean	NTA	*	*	*	*	*	Solid	Natural media	LUFA 2.2	Light	16
41	SR	Article	Soil	Bicho	2016	10.1016/j.jhazmat.2016.07.040	Effects of Ag nanomaterials and Ag salt can be discriminated in a full life cycle long term test with Enchytraeus cryoticus	Bicho et al 2016 Effects of Ag nanomaterials and Ag salt can be discriminated in a full life cycle long term test with Enchytraeus cryoticus. Journal of Hazardous Materials 318, 608–614 .	NM300K	AgNM	JRC	Suspension	Ag	*	*	89.8	Tween	9005-70-3	8% (4% each)	*	15	Below 20	*	*	TEM	*	Spheroidal	*	*	*	17	TEM	9	25	MilliQ Water and 10.2% of Ag in suspension	*	52.31	Mean	NTA	*	*	*	*	*	Solid	Natural media	LUFA 2.2	Light	16
42	SR	Article	Soil	Bicho	2016	10.1016/j.jhazmat.2016.07.040	Effects of Ag nanomaterials and Ag salt can be discriminated in a full life cycle long term test with Enchytraeus cryoticus	Bicho et al 2016 Effects of Ag nanomaterials and Ag salt can be discriminated in a full life cycle long term test with Enchytraeus cryoticus. Journal of Hazardous Materials 318, 608–614 .	NM300K	AgNM	JRC	Suspension	Ag	*	*	89.8	Tween	9005-70-3	8% (4% each)	*	15	Below 20	*	*	TEM	*	Spheroidal	*	*	*	17	TEM	9	25	MilliQ Water and 10.2% of Ag in suspension	*	52.31	Mean	NTA	*	*	*	*	*	Solid	Natural media	LUFA 2.2	Light	16
43	SR	Article	Soil	Bicho	2016	10.1016/j.jhazmat.2016.07.040	Effects of Ag nanomaterials and Ag salt can be discriminated in a full life cycle long term test with Enchytraeus cryoticus	Bicho et al 2016 Effects of Ag nanomaterials and Ag salt can be discriminated in a full life cycle long term test with Enchytraeus cryoticus. Journal of Hazardous Materials 318, 608–614 .	NM300K	AgNM	JRC	Suspension	Ag	*	*	89.8	Tween	9005-70-3	8% (4% each)	*	15	Below 20	*	*	TEM	*	Spheroidal	*	*	*	17	TEM	9	25	MilliQ Water and 10.2% of Ag in suspension	*	52.31	Mean	NTA	*	*	*	*	*	Solid	Natural media	LUFA 2.2	Light	16
44	SR	Article	Soil	Bicho	2016	10.1016/j.jhazmat.2016.07.040	Effects of Ag nanomaterials and Ag salt can be discriminated in a full life cycle long term test with Enchytraeus cryoticus	Bicho et al 2016 Effects of Ag nanomaterials and Ag salt can be discriminated in a full life cycle long term test with Enchytraeus cryoticus. Journal of Hazardous Materials 318, 608–614 .	NM300K	AgNM	JRC	Suspension	Ag	*	*	89.8	Tween	9005-70-3	8% (4% each)	*	15	Below 20	*	*	TEM	*	Spheroidal	*	*	*	17	TEM	9	25	MilliQ Water and 10.2% of Ag in suspension	*	52.31	Mean	NTA	*	*	*	*	*	Solid	Natural media	LUFA 2.2	Light	16
45	SR	Article	Soil	Bicho	2016	10.1016/j.jhazmat.2016.07.040	Effects of Ag nanomaterials and Ag salt can be discriminated in a full life cycle long term test with Enchytraeus cryoticus	Bicho et al 2016 Effects of Ag nanomaterials and Ag salt can be discriminated in a full life cycle long term test with Enchytraeus cryoticus. Journal of Hazardous Materials 318, 608–614 .	NM300K	AgNM	JRC	Suspension	Ag	*	*	89.8	Tween	9005-70-3	8% (4% each)	*	15	Below 20	*	*	TEM	*	Spheroidal	*	*	*	17	TEM	9	25	MilliQ Water and 10.2% of Ag in suspension	*	52.31	Mean	NTA	*	*	*	*	*	Solid	Natural media	LUFA 2.2	Light	16
46	SR	Article	Soil	Bicho	2016	10.1016/j.jhazmat.2016.07.040	Effects of Ag nanomaterials and Ag salt can be discriminated in a full life cycle long term test with Enchytraeus cryoticus	Bicho et al 2016 Effects of Ag nanomaterials and Ag salt can be discriminated in a full life cycle long term test with Enchytraeus cryoticus. Journal of Hazardous Materials 318, 608–614 .	NM300K	AgNM	JRC	Suspension	Ag	*	*	89.8	Tween	9005-70-3	8% (4% each)	*	15	Below 20	*	*	TEM	*	Spheroidal	*	*	*	17	TEM	9	25	MilliQ Water and 10.2% of Ag in suspension	*	52.31	Mean	NTA	*	*	*	*	*	Solid	Natural media	LUFA 2.2	Light	16
47	SR	Article	Soil	Bicho	2016	10.1016/j.jhazmat.2016.07.040	Effects of Ag nanomaterials and Ag salt can be discriminated in a full life cycle long term test with Enchytraeus cryoticus	Bicho et al 2016 Effects of Ag nanomaterials and Ag salt can be discriminated in a full life cycle long term test with Enchytraeus cryoticus. Journal of Hazardous Materials 318, 608–614 .	NM300K	AgNM	JRC	Suspension	Ag	*	*	89.8	Tween	9005-70-3	8% (4% each)	*	15	Below 20	*	*	TEM	*	Spheroidal	*	*	*	17	TEM	9	25	MilliQ Water and 10.2% of Ag in suspension	*	52.31	Mean	NTA	*	*	*	*	*	Solid	Natural media	LUFA 2.2	Light	16
48	SR	Article	Soil	Bicho	2016	10.1016/j.jhazmat.2016.07.040	Effects of Ag nanomaterials and Ag salt can be discriminated in a full life cycle long term test with Enchytraeus cryoticus	Bicho et al 2016 Effects of Ag nanomaterials and Ag salt can be discriminated in a full life cycle long term test with Enchytraeus cryoticus. Journal of Hazardous Materials 318, 608–614 .	NM300K	AgNM	JRC	Suspension	Ag	*	*	89.8	Tween	9005-70-3	8% (4% each)	*	15	Below 20	*	*	TEM	*	Spheroidal	*	*	*	17	TEM	9	25	MilliQ Water and 10.2% of Ag in suspension	*	52.31	Mean	NTA	*	*	*	*	*	Solid	Natural media	LUFA 2.2	Light	16
49	SR	Article	Soil	Bicho	2016	10.1016/j.jhazmat.2016.07.040	Effects of Ag nanomaterials and Ag salt can be discriminated in a full life cycle long term test with Enchytraeus cryoticus	Bicho et al 2016 Effects of Ag nanomaterials and Ag salt can be discriminated in a full life cycle long term test with Enchytraeus cryoticus. Journal of Hazardous Materials 318, 608–614 .	NM300K	AgNM	JRC	Suspension	Ag	*	*	89.8	Tween	9005-70-3	8% (4% each)	*	15	Below 20	*	*	TEM	*	Spheroidal	*	*	*	17	TEM	9	25	MilliQ Water and 10.2% of Ag in suspension	*	52.31	Mean	NTA	*	*	*	*	*	Solid	Natural media	LUFA 2.2	Light	16
50	SR	Article	Soil	Bicho	2016	10.1016/j.jhazmat.2016.07.040	Effects of Ag nanomaterials and Ag salt can be discriminated in a full life cycle long term test with Enchytraeus cryoticus	Bicho et al 2016 Effects of Ag nanomaterials and Ag salt can be discriminated in a full life cycle long term test with Enchytraeus cryoticus. Journal of Hazardous Materials 318, 608–614 .	NM300K	AgNM	JRC	Suspension	Ag	*	*	89.8	Tween	9005-70-3	8% (4% each)	*	15	Below 20	*	*	TEM	*	Spheroidal	*	*	*	17	TEM	9	25	MilliQ Water and 10.2% of Ag in suspension	*	52.31	Mean	NTA	*	*	*	*	*	Solid	Natural media	LUFA 2.2	Light	16
51	SR	Article	Soil	Bicho	2016	10.1016/j.jhazmat.2016.07.040	Effects of Ag nanomaterials and Ag salt can be discriminated in a full life cycle long term test with Enchytraeus cryoticus	Bicho et al 2016 Effects of Ag nanomaterials and Ag salt can be discriminated in a full life cycle long term test with Enchytraeus cryoticus. Journal of Hazardous Materials 318, 608–614 .	NM300K	AgNM	JRC	Suspension	Ag	*	*	89.8	Tween	9005-70-3	8% (4% each)	*	15	Below 20	*	*	TEM	*	Spheroidal	*	*	*	17	TEM	9	25	MilliQ Water and 10.2% of Ag in suspension	*	52.31	Mean	NTA	*	*	*	*	*	Solid	Natural media	LUFA 2.2	Light	16
52	SR	Article	Soil	Bicho	2016	10.1016/j.jhazmat.2016.07.040	Effects of Ag nanomaterials and Ag salt can be discriminated in a full life cycle long term test with Enchytraeus cryoticus	Bicho et al 2016 Effects of Ag nanomaterials and Ag salt can be discriminated in a full life cycle long term test with Enchytraeus cryoticus. Journal of Hazardous Materials 318, 608–614 .	NM300K	AgNM	JRC	Suspension	Ag	*	*	89.8	Tween	9005-70-3	8% (4% each)	*	15	Below 20	*	*	TEM	*	Spheroidal	*	*	*	17	TEM	9	25	MilliQ Water and 10.2% of Ag in suspension	*	52.31	Mean	NTA	*	*	*	*	*	Solid	Natural media	LUFA 2.2	Light	16
53	SR	Article	Soil	Bicho	2016	10.1016/j.jhazmat.2016.07.040	Effects of Ag nanomaterials and Ag salt can be discriminated in a full life cycle long term test with Enchytraeus cryoticus	Bicho et al 2016 Effects of Ag nanomaterials and Ag salt can be discriminated in a full life cycle long term test with Enchytraeus cryoticus. Journal of Hazardous Materials 318, 608–614 .	NM300K	AgNM	JRC	Suspension	Ag	*	*	89.8	Tween	9005-70-3	8% (4% each)	*	15	Below 20	*	*	TEM	*	Spheroidal	*	*	*	17	TEM	9	25	MilliQ Water and 10.2% of Ag in suspension	*	52.31	Mean	NTA	*	*	*	*	*	Solid	Natural media	LUFA 2.2	Light	16
54	SR	Article	Soil	Bicho	2016	10.1016/j.jhazmat.2016.07.040	Effects of Ag nanomaterials and Ag salt can be discriminated in a full life cycle long term test with Enchytraeus cryoticus	Bicho et al 2016 Effects of Ag nanomaterials and Ag salt can be discriminated in a full life cycle long term test with Enchytraeus cryoticus. Journal of Hazardous Materials 318, 608–614 .	NM300K	AgNM	JRC	Suspension	Ag	*	*	89.8	Tween	9005-70-3	8% (4% each)	*	15	Below 20	*	*	TEM	*	Spheroidal	*	*	*	17	TEM	9	25	MilliQ Water and 10.2% of Ag in suspension	*	52.31	Mean	NTA	*	*	*	*	*	Solid	Natural media	LUFA 2.2	Light	16
55	SR	Article	Soil	Bicho	2016	10.1016/j.jhazmat.2016.07.040	Effects of Ag nanomaterials and Ag salt can be discriminated in a full life cycle long term test with Enchytraeus cryoticus	Bicho et al 2016 Effects of Ag nanomaterials and Ag salt can be discriminated in a full life cycle long term test with Enchytraeus cryoticus. Journal of Hazardous Materials 318, 608–614 .	NM300K	AgNM	JRC	Suspension	Ag	*	*	89.8	Tween	9005-70-3	8% (4% each)	*	15	Below 20	*	*	TEM	*	Spheroidal	*	*	*	17	TEM	9	25	MilliQ Water and 10.2% of Ag in suspension	*	52.31	Mean	NTA	*	*	*	*	*	Solid	Natural media	LUFA 2.2	Light	16
56	SR	Article	Soil	Bicho	2016	10.1016/j.jhazmat.2016.07.040	Effects of Ag nanomaterials and Ag salt can be discriminated in a full life cycle long term test with Enchytraeus cryoticus	Bicho et al 2016 Effects of Ag nanomaterials and Ag salt can be discriminated in a full life cycle long term test with Enchytraeus cryoticus. Journal of Hazardous Materials 318, 608–614 .	NM300K	AgNM	JRC	Suspension	Ag	*	*	89.8	Tween	9005-70-3	8% (4% each)	*	15	Below 20	*	*	TEM	*	Spheroidal	*	*	*	17	TEM	9	25	MilliQ Water and 10.2% of Ag in suspension	*	52.31	Mean	NTA	*	*	*	*	*	Solid	Natural media	LUFA 2.2	Light	16
57	SR	Article	Soil	Bicho	2016	10.1016/j.jhazmat.2016.07.040	Effects of Ag nanomaterials and Ag salt can be discriminated in a full life cycle long term test with Enchytraeus cryoticus	Bicho et al 2016 Effects of Ag nanomaterials and Ag salt can be discriminated in a full life cycle long term test with Enchytraeus cryoticus. Journal of Hazardous Materials 318, 608–614 .	NM300K	AgNM	JRC	Suspension	Ag	*	*	89.8	Tween	9005-70-3	8% (4% each)	*	15	Below 20	*	*	TEM	*	Spheroidal	*	*	*	17	TEM	9	25	MilliQ Water and 10.2% of Ag in suspension	*	52.31	Mean	NTA	*	*	*	*	*	Solid	Natural media	LUFA 2.2	Light	16
58	SR	Article	Soil	Bicho	2016	10.1016/j.jhazmat.2016.07.040	Effects of Ag nanomaterials and Ag salt can be discriminated in a full life cycle long term test with Enchytraeus cryoticus	Bicho et al 2016 Effects of Ag nanomaterials and Ag salt can be discriminated in a full life cycle long term test with Enchytraeus cryoticus. Journal of Hazardous Materials 318, 608–614 .	NM300K	AgNM	JRC	Suspension	Ag	*	*	89.8	Tween	9005-70-3	8% (4% each)	*	15	Below 20	*	*	TEM	*	Spheroidal	*	*	*	17	TEM	9	25	MilliQ Water and 10.2% of Ag in suspension	*	52.31	Mean	NTA	*	*	*	*	*	Solid	Natural media	LUFA 2.2	Light	16
59	SR	Article	Soil	Bicho	2016	10.1016/j.jhazmat.2016.07.040	Effects of Ag nanomaterials and Ag salt can be discriminated in a full life cycle long term test with Enchytraeus cryoticus	Bicho et al 2016 Effects of Ag nanomaterials and Ag salt can be discriminated in a full life cycle long term test with Enchytraeus cryoticus. Journal of Hazardous Materials 318, 608–614 .	NM300K	AgNM	JRC	Suspension	Ag	*	*	89.8	Tween	9005-70-3	8% (4% each)	*	15	Below 20	*	*	TEM	*	Spheroidal	*	*	*	17	TEM	9	25	MilliQ Water and 10.2% of Ag in suspension	*	52.31	Mean	NTA	*	*	*	*	*	Solid	Natural media	LUFA 2.2	Light	16
60	SR	Article	Soil	Bicho	2016	10.1016/j.jhazmat.2016.07.040	Effects of Ag nanomaterials and Ag salt can be discriminated in a full life cycle long term test with Enchytraeus cryoticus	Bicho et al 2016 Effects of Ag nanomaterials and Ag salt can be discriminated in a full life cycle long term test with Enchytraeus cryoticus. Journal of Hazardous Materials 318, 608–614 .	AgNO3		Sigma-Aldrich	Suspension	Ag	7761-88-8	99	*	*	*	*	*	Unreported	Unreported	*	*	*	*	*	*	*	*	*	*	*	*	*	*	*	*	*	*	*	*	*	*	Solid	Natural media	LUFA 2.2	Light	16
61	SR	Article	Soil	Bicho	2016	10.1016/j.jhazmat.2016.07.040	Effects of Ag nanomaterials and Ag salt can be discriminated in a full life cycle long term test with Enchytraeus cryoticus	Bicho et al 2016 Effects of Ag nanomaterials and Ag salt can be discriminated in a full life cycle long term test with Enchytraeus cryoticus. Journal of Hazardous Materials 318, 608–614 .	AgNO3		Sigma-Aldrich	Suspension	Ag	7761-88-8	99	*	*	*	*	*	Unreported	Unreported	*	*	*	*	*	*	*	*	*	*	*	*	*	*	*	*	*	*	*	*	*	*	Solid	Natural media	LUFA 2.2	Light	16
62	SR	Article	Soil	Bicho	2016	10.1016/j.jhazmat.2016.07.040	Effects of Ag nanomaterials and Ag salt can be discriminated in a full life cycle long term test with Enchytraeus cryoticus	Bicho et al 2016 Effects of Ag nanomaterials and Ag salt can be discriminated in a full life cycle long term test with Enchytraeus cryoticus. Journal of Hazardous Materials 318, 608–614 .	AgNO3		Sigma-Aldrich	Suspension	Ag	7761-88-8	99	*	*	*	*	*	Unreported	Unreported	*	*	*	*	*	*	*	*	*	*	*	*	*	*	*	*	*	*	*	*	*	*	Solid	Natural media	LUFA 2.2	Light	16
63	SR	Article	Soil	Bicho	2016	10.1016/j.jhazmat.2016.07.040	Effects of Ag nanomaterials and Ag salt can be discriminated in a full life cycle long term test with Enchytraeus cryoticus	Bicho et al 2016 Effects of Ag nanomaterials and Ag salt can be discriminated in a full life cycle long term test with Enchytraeus cryoticus. Journal of Hazardous Materials 318, 608–614 .	AgNO3		Sigma-Aldrich	Suspension	Ag	7761-88-8	99	*	*	*	*	*	Unreported	Unreported	*	*	*	*	*	*	*	*	*	*	*	*	*	*	*	*	*	*	*	*	*	*	Solid	Natural media	LUFA 2.2	Light	16
64	SR	Article	Soil	Bicho	2016	10.1016/j.jhazmat.2016.07.040	Effects of Ag nanomaterials and Ag salt can be discriminated in a full life cycle long term test with Enchytraeus cryoticus	Bicho et al 2016 Effects of Ag nanomaterials and Ag salt can be discriminated in a full life cycle long term test with Enchytraeus cryoticus. Journal of Hazardous Materials 318, 608–614 .	AgNO3		Sigma-Aldrich	Suspension	Ag	7761-88-8	99	*	*	*	*	*	Unreported	Unreported	*	*	*	*	*	*	*	*	*	*	*	*	*	*	*	*	*	*	*	*	*	*	Solid	Natural media	LUFA 2.2	Light	16
65	SR	Article	Soil	Bicho	2016	10.1016/j.jhazmat.2016.07.040	Effects of Ag nanomaterials and Ag salt can be discriminated in a full life cycle long term test with Enchytraeus cryoticus	Bicho et al 2016 Effects of Ag nanomaterials and Ag salt can be discriminated in a full life cycle long term test with Enchytraeus cryoticus. Journal of Hazardous Materials 318, 608–614 .	AgNO3		Sigma-Aldrich	Suspension	Ag	7761-88-8	99	*	*	*	*	*	Unreported	Unreported	*	*	*	*	*	*	*	*	*	*	*	*	*	*	*	*	*	*	*	*	*	*	Solid	Natural media	LUFA 2.2	Light	16
66	SR	Article	Soil	Bicho	2016	10.1016/j.jhazmat.2016.07.040	Effects of Ag nanomaterials and Ag salt can be discriminated in a full life cycle long term test with Enchytraeus cryoticus	Bicho et al 2016 Effects of Ag nanomaterials and Ag salt can be discriminated in a full life cycle long term test with Enchytraeus cryoticus. Journal of Hazardous Materials 318, 608–614 .	AgNO3		Sigma-Aldrich	Suspension	Ag	7761-88-8	99	*	*	*	*	*	Unreported	Unreported	*	*	*	*	*	*	*	*	*	*	*	*	*	*	*	*	*	*	*	*	*	*	Solid	Natural media	LUFA 2.2	Light	16
67	SR	Article	Soil	Bicho	2016	10.1016/j.jhazmat.2016.07.040	Effects of Ag nanomaterials and Ag salt can be discriminated in a full life cycle long term test with Enchytraeus cryoticus	Bicho et al 2016 Effects of Ag nanomaterials and Ag salt can be discriminated in a full life cycle long term test with Enchytraeus cryoticus. Journal of Hazardous Materials 318, 608–614 .	AgNO3		Sigma-Aldrich	Suspension	Ag	7761-88-8	99	*	*	*	*	*	Unreported	Unreported	*	*	*	*	*	*	*	*	*	*	*	*	*	*	*	*	*	*	*	*	*	*	Solid	Natural media	LUFA 2.2	Light	16
68	SR	Article	Soil	Bicho	2016	10.1016/j.jhazmat.2016.07.040	Effects of Ag nanomaterials and Ag salt can be discriminated in a full life cycle long term test with Enchytraeus cryoticus	Bicho et al 2016 Effects of Ag nanomaterials and Ag salt can be discriminated in a full life cycle long term test with Enchytraeus cryoticus. Journal of Hazardous Materials 318, 608–614 .	AgNO3		Sigma-Aldrich	Suspension	Ag	7761-88-8	99	*	*	*	*	*	Unreported	Unreported	*	*	*	*	*	*	*	*	*	*	*	*	*	*	*	*	*	*	*	*	*	*	Solid	Natural media	LUFA 2.2	Light	16
69	SR	Article	Soil	Bicho	2016	10.1016/j.jhazmat.2016.07.040	Effects of Ag nanomaterials and Ag salt can be discriminated in a full life cycle long term test with Enchytraeus cryoticus	Bicho et al 2016 Effects of Ag nanomaterials and Ag salt can be discriminated in a full life cycle long term test with Enchytraeus cryoticus. Journal of Hazardous Materials 318, 608–614 .	AgNO3		Sigma-Aldrich	Suspension	Ag	7761-88-8	99	*	*	*	*	*	Unreported	Unreported	*	*	*	*	*	*	*	*	*	*	*	*	*	*	*	*	*	*	*	*	*	*	Solid	Natural media	LUFA 2.2	Light	16
70	SR	Article	Soil	Bicho	2016	10.1016/j.jhazmat.2016.07.040	Effects of Ag nanomaterials and Ag salt can be discriminated in a full life cycle long term test with Enchytraeus cryoticus	Bicho et al 2016 Effects of Ag nanomaterials and Ag salt can be discriminated in a full life cycle long term test with Enchytraeus cryoticus. Journal of Hazardous Materials 318, 608–614 .	AgNO3		Sigma-Aldrich	Suspension	Ag	7761-88-8	99	*	*	*	*	*	Unreported	Unreported	*	*	*	*	*	*	*	*	*	*	*	*	*	*	*	*	*	*	*	*	*	*	Solid	Natural media	LUFA 2.2	Light	16
71	SR	Article	Soil	Bicho	2016	10.1016/j.jhazmat.2016.07.040	Effects of Ag nanomaterials and Ag salt can be discriminated in a full life cycle long term test with Enchytraeus cryoticus	Bicho et al 2016 Effects of Ag nanomaterials and Ag salt can be discriminated in a full life cycle long term test with Enchytraeus cryoticus. Journal of Hazardous Materials 318, 608–614 .	AgNO3		Sigma-Aldrich	Suspension	Ag	7761-88-8	99	*	*	*	*	*	Unreported	Unreported	*	*	*	*	*	*	*	*	*	*	*	*	*	*	*	*	*	*	*	*	*	*	Solid	Natural media	LUFA 2.2	Light	16
72	SR	Article	Soil	Bicho	2016	10.1016/j.jhazmat.2016.07.040	Effects of Ag nanomaterials and Ag salt can be discriminated in a full life cycle long term test with Enchytraeus cryoticus	Bicho et al 2016 Effects of Ag nanomaterials and Ag salt can be discriminated in a full life cycle long term test with Enchytraeus cryoticus. Journal of Hazardous Materials 318, 608–614 .	AgNO3		Sigma-Aldrich	Suspension	Ag	7761-88-8	99	*	*	*	*	*	Unreported	Unreported	*	*	*	*	*	*	*	*	*	*	*	*	*	*	*	*	*	*	*	*	*	*	Solid	Natural media	LUFA 2.2	Light	16
73	SR	Article	Soil	Bicho	2016	10.1016/j.jhazmat.2016.07.040	Effects of Ag nanomaterials and Ag salt can be discriminated in a full life cycle long term test with Enchytraeus cryoticus	Bicho et al 2016 Effects of Ag nanomaterials and Ag salt can be discriminated in a full life cycle long term test with Enchytraeus cryoticus. Journal of Hazardous Materials 318, 608–614 .	AgNO3		Sigma-Aldrich	Suspension	Ag	7761-88-8	99	*	*	*	*	*	Unreported	Unreported	*	*	*	*	*	*	*	*	*	*	*	*	*	*	*	*	*	*	*	*	*	*	Solid	Natural media	LUFA 2.2	Light	16
74	SR	Article	Soil	Bicho	2016	10.1016/j.jhazmat.2016.07.040	Effects of Ag nanomaterials and Ag salt can be discriminated in a full life cycle long term test with Enchytraeus cryoticus	Bicho et al 2016 Effects of Ag nanomaterials and Ag salt can be discriminated in a full life cycle long term test with Enchytraeus cryoticus. Journal of Hazardous Materials 318, 608–614 .	AgNO3		Sigma-Aldrich	Suspension	Ag	7761-88-8	99	*	*	*	*	*	Unreported	Unreported	*	*	*	*	*	*	*	*	*	*	*	*	*	*	*	*	*	*	*	*	*	*	Solid	Natural media	LUFA 2.2	Light	16
75	SR	Article	Soil	Bicho	2016	10.1016/j.jhazmat.2016.07.040	Effects of Ag nanomaterials and Ag salt can be discriminated in a full life cycle long term test with Enchytraeus cryoticus	Bicho et al 2016 Effects of Ag nanomaterials and Ag salt can be discriminated in a full life cycle long term test with Enchytraeus cryoticus. Journal of Hazardous Materials 318, 608–614 .	AgNO3		Sigma-Aldrich	Suspension	Ag	7761-88-8	99	*	*	*	*	*	Unreported	Unreported	*	*	*	*	*	*	*	*	*	*	*	*	*	*	*	*	*	*	*	*	*	*	Solid	Natural media	LUFA 2.2	Light	16
76	SR	Article	Soil	Bicho	2016	10.1016/j.jhazmat.2016.07.040	Effects of Ag nanomaterials and Ag salt can be discriminated in a full life cycle long term test with Enchytraeus cryoticus	Bicho et al 2016 Effects of Ag nanomaterials and Ag salt can be discriminated in a full life cycle long term test with Enchytraeus cryoticus. Journal of Hazardous Materials 318, 608–614 .	AgNO3		Sigma-Aldrich	Suspension	Ag	7761-88-8	99	*	*	*	*	*	Unreported	Unreported	*	*	*	*	*	*	*	*	*	*	*	*	*	*	*	*	*	*	*	*	*	*	Solid	Natural media	LUFA 2.2	Light	16
77	SR	Article	Soil	Bicho	2016	10.1016/j.jhazmat.2016.07.040	Effects of Ag nanomaterials and Ag salt can be discriminated in a full life cycle long term test with Enchytraeus cryoticus	Bicho et al 2016 Effects of Ag nanomaterials and Ag salt can be discriminated in a full life cycle long term test with Enchytraeus cryoticus. Journal of Hazardous Materials 318, 608–614 .	AgNO3		Sigma-Aldrich	Suspension	Ag	7761-88-8	99	*	*	*	*	*	Unreported	Unreported	*	*	*	*	*	*	*	*	*	*	*	*	*	*	*	*	*	*	*	*	*	*	Solid	Natural media	LUFA 2.2	Light	16
78	SR	Article	Soil	Bicho	2016	10.1016/j.jhazmat.2016.07.040	Effects of Ag nanomaterials and Ag salt can be discriminated in a full life cycle long term test with Enchytraeus cryoticus	Bicho et al 2016 Effects of Ag nanomaterials and Ag salt can be discriminated in a full life cycle long term test with Enchytraeus cryoticus. Journal of Hazardous Materials 318, 608–614 .	AgNO3		Sigma-Aldrich	Suspension	Ag	7761-88-8	99	*	*	*	*	*	Unreported	Unreported	*	*	*	*	*	*	*	*	*	*	*	*	*	*	*	*	*	*	*	*	*	*	Solid	Natural media	LUFA 2.2	Light	16
79	SR	Article	Soil	Bicho	2016	10.1016/j.jhazmat.2016.07.040	Effects of Ag nanomaterials and Ag salt can be discriminated in a full life cycle long term test with Enchytraeus cryoticus	Bicho et al 2016 Effects of Ag nanomaterials and Ag salt can be discriminated in a full life cycle long term test with Enchytraeus cryoticus. Journal of Hazardous Materials 318, 608–614 .	AgNO3		Sigma-Aldrich	Suspension	Ag	7761-88-8	99	*	*	*	*	*	Unreported	Unreported	*	*	*	*	*	*	*	*	*	*	*	*	*	*	*	*	*	*	*	*	*	*	Solid	Natural media	LUFA 2.2	Light	16
80	SR	Article	Soil	Bicho	2016	10.1016/j.jhazmat.2016.07.040	Effects of Ag nanomaterials and Ag salt can be discriminated in a full life cycle long term test with Enchytraeus cryoticus	Bicho et al 2016 Effects of Ag nanomaterials and Ag salt can be discriminated in a full life cycle long term test with Enchytraeus cryoticus. Journal of Hazardous Materials 318, 608–614 .	AgNO3		Sigma-Aldrich	Suspension	Ag	7761-88-8	99	*	*	*	*	*	Unreported	Unreported	*	*	*	*	*	*	*	*	*	*	*	*	*	*	*	*	*	*	*	*	*	*	Solid	Natural media	LUFA 2.2	Light	16
81	SR	Article	Soil	Bicho	2016	10.1016/j.jhazmat.2016.07.040	Effects of Ag nanomaterials and Ag salt can be discriminated in a full life cycle long term test with Enchytraeus cryoticus	Bicho et al 2016 Effects of Ag nanomaterials and Ag salt can be discriminated in a full life cycle long term test with Enchytraeus cryoticus. Journal of Hazardous Materials 318, 608–614 .	AgNO3		Sigma-Aldrich	Suspension	Ag	7761-88-8	99	*	*	*	*	*	Unreported	Unreported	*	*	*	*	*	*	*	*	*	*	*	*	*	*	*	*	*	*	*	*	*	*	Solid	Natural media	LUFA 2.2	Light	16
82	SR	Article	Soil	Bicho	2016	10.1016/j.jhazmat.2016.07.040	Effects of Ag nanomaterials and Ag salt can be discriminated in a full life cycle long term test with Enchytraeus cryoticus	Bicho et al 2016 Effects of Ag nanomaterials and Ag salt can be discriminated in a full life cycle long term test with Enchytraeus cryoticus. Journal of Hazardous Materials 318, 608–614 .	AgNO3		Sigma-Aldrich	Suspension	Ag	7761-88-8	99	*	*	*	*	*	Unreported	Unreported	*	*	*	*	*	*	*	*	*	*	*	*	*	*	*	*	*	*	*	*	*	*	Solid	Natural media	LUFA 2.2	Light	16
83	SR	Article	Soil	Bicho	2016	10.1016/j.jhazmat.2016.07.040	Effects of Ag nanomaterials and Ag salt can be discriminated in a full life cycle long term test with Enchytraeus cryoticus	Bicho et al 2016 Effects of Ag nanomaterials and Ag salt can be discriminated in a full life cycle long term test with Enchytraeus cryoticus. Journal of Hazardous Materials 318, 608–614 .	AgNO3		Sigma-Aldrich	Suspension	Ag	7761-88-8	99	*	*	*	*	*	Unreported	Unreported	*	*	*	*	*	*	*	*	*	*	*	*	*	*	*	*	*	*	*	*	*	*	Solid	Natural media	LUFA 2.2	Light	16
84	SR	Article	Soil	Bicho	2016	10.1016/j.jhazmat.2016.07.040	Effects of Ag nanomaterials and Ag salt can be discriminated in a full life cycle long term test with Enchytraeus cryoticus	Bicho et al 2016 Effects of Ag nanomaterials and Ag salt can be discriminated in a full life cycle long term test with Enchytraeus cryoticus. Journal of Hazardous Materials 318, 608–614 .	AgNO3		Sigma-Aldrich	Suspension	Ag	7761-88-8	99	*	*	*	*	*	Unreported	Unreported	*	*	*	*	*	*	*	*	*	*	*	*	*	*	*	*	*	*	*	*	*	*	Solid	Natural media	LUFA 2.2	Light	16
85	SR	Article	Soil	Bicho	2016	10.1016/j.jhazmat.2016.07.040	Effects of Ag nanomaterials and Ag salt can be discriminated in a full life cycle long term test with Enchytraeus cryoticus	Bicho et al 2016 Effects of Ag nanomaterials and Ag salt can be discriminated in a full life cycle long term test with Enchytraeus cryoticus. Journal of Hazardous Materials 318, 608–614 .	AgNO3		Sigma-Aldrich	Suspension	Ag	7761-88-8	99	*	*	*	*	*	Unreported	Unreported	*	*	*	*	*	*	*	*	*	*	*	*	*	*	*	*	*	*	*	*	*	*	Solid	Natural media	LUFA 2.2	Light	16
86	SR	Article	Soil	Bicho	2016	10.1016/j.jhazmat.2016.07.040	Effects of Ag nanomaterials and Ag salt can be discriminated in a full life cycle long term test with Enchytraeus cryoticus	Bicho et al 2016 Effects of Ag nanomaterials and Ag salt can be discriminated in a full life cycle long term test with Enchytraeus cryoticus. Journal of Hazardous Materials 318, 608–614 .	AgNO3		Sigma-Aldrich	Suspension	Ag	7761-88-8	99	*	*	*	*	*	Unreported	Unreported	*	*	*	*	*	*	*	*	*	*	*	*	*	*	*	*	*	*	*	*	*	*	Solid	Natural media	LUFA 2.2	Light	16
87	SR	Article	Soil	Bicho	2016	10.1016/j.jhazmat.2016.07.040	Effects of Ag nanomaterials and Ag salt can be discriminated in a full life cycle long term test with Enchytraeus cryoticus	Bicho et al 2016 Effects of Ag nanomaterials and Ag salt can be discriminated in a full life cycle long term test with Enchytraeus cryoticus. Journal of Hazardous Materials 318, 608–614 .	AgNO3		Sigma-Aldrich	Suspension	Ag	7761-88-8	99	*	*	*	*	*	Unreported	Unreported	*	*	*	*	*	*	*	*	*	*	*	*	*	*	*	*	*	*	*	*	*	*	Solid	Natural media	LUFA 2.2	Light	16
88	SR	Article	Soil	Bicho	2016	10.1016/j.jhazmat.2016.07.040	Effects of Ag nanomaterials and Ag salt can be discriminated in a full life cycle long term test with Enchytraeus cryoticus	Bicho et al 2016 Effects of Ag nanomaterials and Ag salt can be discriminated in a full life cycle long term test with Enchytraeus cryoticus. Journal of Hazardous Materials 318, 608–614 .	AgNO3		Sigma-Aldrich	Suspension	Ag	7761-88-8	99	*	*	*	*	*	Unreported	Unreported	*	*	*	*	*	*	*	*	*	*	*	*	*	*	*	*	*	*	*	*	*	*	Solid	Natural media	LUFA 2.2	Light	16
89	SR	Article	Soil	Bicho	2016	10.1016/j.jhazmat.2016.07.040	Effects of Ag nanomaterials and Ag salt can be discriminated in a full life cycle long term test with Enchytraeus cryoticus	Bicho et al 2016 Effects of Ag nanomaterials and Ag salt can be discriminated in a full life cycle long term test with Enchytraeus cryoticus. Journal of Hazardous Materials 318, 608–614 .	AgNO3		Sigma-Aldrich	Suspension	Ag	7761-88-8	99	*	*	*	*	*	Unreported	Unreported	*	*	*	*	*	*	*	*	*	*	*	*	*	*	*	*	*	*	*	*	*	*	Solid	Natural media	LUFA 2.2	Light	16
90	SR	Article	Soil	Bicho	2016	10.1016/j.jhazmat.2016.07.040	Effects of Ag nanomaterials and Ag salt can be discriminated in a full life cycle long term test with Enchytraeus cryoticus	Bicho et al 2016 Effects of Ag nanomaterials and Ag salt can be discriminated in a full life cycle long term test with Enchytraeus cryoticus. Journal of Hazardous Materials 318, 608–614 .	AgNO3		Sigma-Aldrich	Suspension	Ag	7761-88-8	99	*	*	*	*	*	Unreported	Unreported	*	*	*	*	*	*	*	*	*	*	*	*	*	*	*	*	*	*	*	*	*	*	Solid	Natural media	LUFA 2.2	Light	16
91	SR	Article	Soil	Bicho	2016	10.1016/j.jhazmat.2016.07.040	Effects of Ag nanomaterials and Ag salt can be discriminated in a full life cycle long term test with Enchytraeus cryoticus	Bicho et al 2016 Effects of Ag nanomaterials and Ag salt can be discriminated in a full life cycle long term test with Enchytraeus cryoticus. Journal of Hazardous Materials 318, 608–614 .	AgNO3		Sigma-Aldrich	Suspension	Ag	7761-88-8	99	*	*	*	*	*	Unreported	Unreported	*	*	*	*	*	*	*	*	*	*	*	*	*	*	*	*	*	*	*	*	*	*	Solid	Natural media	LUFA 2.2	Light	16
92	SR	Article	Soil	Bicho	2016	10.1016/j.jhazmat.2016.07.040	Effects of Ag nanomaterials and Ag salt can be discriminated in a full life cycle long term test with Enchytraeus cryoticus	Bicho et al 2016 Effects of Ag nanomaterials and Ag salt can be discriminated in a full life cycle long term test with Enchytraeus cryoticus. Journal of Hazardous Materials 318, 608–614 .	AgNO3		Sigma-Aldrich	Suspension	Ag	7761-88-8	99	*	*	*	*	*	Unreported	Unreported	*	*	*	*	*	*	*	*	*	*	*	*	*	*	*	*	*	*	*	*	*	*	Solid	Natural media	LUFA 2.2	Light	16
93	SR	Article	Soil	Bicho	2016	10.1016/j.jhazmat.2016.07.040	Effects of Ag nanomaterials and Ag salt can be discriminated in a full life cycle long term test with Enchytraeus cryoticus	Bicho et al 2016 Effects of Ag nanomaterials and Ag salt can be discriminated in a full life cycle long term test with Enchytraeus cryoticus. Journal of Hazardous Materials 318, 608–614 .	AgNO3		Sigma-Aldrich	Suspension	Ag	7761-88-8	99	*	*	*	*	*	Unreported	Unreported	*	*	*	*	*	*	*	*	*	*	*	*	*	*	*	*	*	*	*	*	*	*	Solid	Natural media	LUFA 2.2	Light	16
94	SR	Article	Soil	Bicho	2016	10.1016/j.jhazmat.2016.07.040	Effects of Ag nanomaterials and Ag salt can be discriminated in a full life cycle long term test with Enchytraeus cryoticus	Bicho et al 2016 Effects of Ag nanomaterials and Ag salt can be discriminated in a full life cycle long term test with Enchytraeus cryoticus. Journal of Hazardous Materials 318, 608–614 .	AgNO3		Sigma-Aldrich	Suspension	Ag	7761-88-8	99	*	*	*	*	*	Unreported	Unreported	*	*	*	*	*	*	*	*	*	*	*	*	*	*	*	*	*	*	*	*	*	*	Solid	Natural media	LUFA 2.2	Light	16
95	SR	Article	Soil	Bicho	2016	10.1016/j.jhazmat.2016.07.040	Effects of Ag nanomaterials and Ag salt can be discriminated in a full life cycle long term test with Enchytraeus cryoticus	Bicho et al 2016 Effects of Ag nanomaterials and Ag salt can be discriminated in a full life cycle long term test with Enchytraeus cryoticus. Journal of Hazardous Materials 318, 608–614 .	AgNO3		Sigma-Aldrich	Suspension	Ag	7761-88-8	99	*	*	*	*	*	Unreported	Unreported	*	*	*	*	*	*	*	*	*	*	*	*	*	*	*	*	*	*	*	*	*	*	Solid	Natural media	LUFA 2.2	Light	16
96	SR	Article	Soil	Bicho	2016	10.1016/j.jhazmat.2016.07.040	Effects of Ag nanomaterials and Ag salt can be discriminated in a full life cycle long term test with Enchytraeus cryoticus	Bicho et al 2016 Effects of Ag nanomaterials and Ag salt can be discriminated in a full life cycle long term test with Enchytraeus cryoticus. Journal of Hazardous Materials 318, 608–614 .	AgNO3		Sigma-Aldrich	Suspension	Ag	7761-88-8	99	*	*	*	*	*	Unreported	Unreported	*	*	*	*	*	*	*	*	*	*	*	*	*	*	*	*	*	*	*	*	*	*	Solid	Natural media	LUFA 2.2	Light	16
97	SR	Article	Soil	Bicho	2016	10.1016/j.jhazmat.2016.07.040	Effects of Ag nanomaterials and Ag salt can be discriminated in a full life cycle long term test with Enchytraeus cryoticus	Bicho et al 2016 Effects of Ag nanomaterials and Ag salt can be discriminated in a full life cycle long term test with Enchytraeus cryoticus. Journal of Hazardous Materials 318, 608–614 .	AgNO3		Sigma-Aldrich	Suspension	Ag	7761-88-8	99	*	*	*	*	*	Unreported	Unreported	*	*	*	*	*	*	*	*	*	*	*	*	*	*	*	*	*	*	*	*	*	*	Solid	Natural media	LUFA 2.2	Light	16
98	SR	Article	Soil	Bicho	2016	10.1016/j.jhazmat.2016.07.040	Effects of Ag nanomaterials and Ag salt can be discriminated in a full life cycle long term test with Enchytraeus cryoticus	Bicho et al 2016 Effects of Ag nanomaterials and Ag salt can be discriminated in a full life cycle long term test with Enchytraeus cryoticus. Journal of Hazardous Materials 318, 608–614 .	AgNO3		Sigma-Aldrich	Suspension	Ag	7761-88-8	99	*	*	*	*	*	Unreported	Unreported	*	*	*	*	*	*	*	*	*	*	*	*	*	*	*	*	*	*	*	*	*	*	Solid	Natural media	LUFA 2.2	Light	16
99	SR	Article	Soil	Bicho	2016	10.1016/j.jhazmat.2016.07.040	Effects of Ag nanomaterials and Ag salt can be discriminated in a full life cycle long term test with Enchytraeus cryoticus	Bicho et al 2016 Effects of Ag nanomaterials and Ag salt can be discriminated in a full life cycle long term test with Enchytraeus cryoticus. Journal of Hazardous Materials 318, 608–614 .	AgNO3		Sigma-Aldrich	Suspension	Ag	7761-88-8	99	*	*	*	*	*	Unreported	Unreported	*	*	*	*	*	*	*	*	*	*	*	*	*	*	*	*	*	*	*	*	*	*	Solid	Natural media	LUFA 2.2	Light	16
100	SR	Article	Soil	Bicho	2016	10.1016/j.jhazmat.2016.07.040	Effects of Ag nanomaterials and Ag salt can be discriminated in a full life cycle long term test with Enchytraeus cryoticus	Bicho et al 2016 Effects of Ag nanomaterials and Ag salt can be discriminated in a full life cycle long term test with Enchytraeus cryoticus. Journal of Hazardous Materials 318, 608–614 .	AgNO3		Sigma-Aldrich	Suspension	Ag	7761-88-8	99	*	*	*	*	*	Unreported	Unreported	*	*	*	*	*	*	*	*	*	*	*	*	*	*	*	*	*	*	*	*	*	*	Solid	Natural media	LUFA 2.2	Light	16
101	SR	Article	Soil	Bicho	2016	10.1016/j.jhazmat.2016.07.040	Effects of Ag nanomaterials and Ag salt can be discriminated in a full life cycle long term test with Enchytraeus cryoticus	Bicho et al 2016 Effects of Ag nanomaterials and Ag salt can be discriminated in a full life cycle long term test with Enchytraeus cryoticus. Journal of Hazardous Materials 318, 608–614 .	AgNO3		Sigma-Aldrich	Suspension	Ag	7761-88-8	99	*	*	*	*	*	Unreported	Unreported	*	*	*	*	*	*	*	*	*	*	*	*	*	*	*	*	*	*	*	*	*	*	Solid	Natural media	LUFA 2.2	Light	16
102	SR	Article	Soil	Bicho	2016	10.1016/j.jhazmat.2016.07.040	Effects of Ag nanomaterials and Ag salt can be discriminated in a full life cycle long term test with Enchytraeus cryoticus	Bicho et al 2016 Effects of Ag nanomaterials and Ag salt can be discriminated in a full life cycle long term test with Enchytraeus cryoticus. Journal of Hazardous Materials 318, 608–614 .	AgNO3		Sigma-Aldrich	Suspension	Ag	7761-88-8	99	*	*	*	*	*	Unreported	Unreported	*	*	*	*	*	*	*	*	*	*	*	*	*	*	*	*	*	*	*	*	*	*	Solid	Natural media	LUFA 2.2	Light	16
103	SR	Article	Soil	Bicho	2016	10.1016/j.jhazmat.2016.07.040	Effects of Ag nanomaterials and Ag salt can be discriminated in a full life cycle long term test with Enchytraeus cryoticus	Bicho et al 2016 Effects of Ag nanomaterials and Ag salt can be discriminated in a full life cycle long term test with Enchytraeus cryoticus. Journal of Hazardous Materials 318, 608–614 .	AgNO3		Sigma-Aldrich	Suspension	Ag	7761-88-8	99	*	*	*	*	*	Unreported	Unreported	*	*	*	*	*	*	*	*	*	*	*	*	*	*	*	*	*	*	*	*	*	*	Solid	Natural media	LUFA 2.2	Light	16
104	SR	Article	Soil	Bicho	2016	10.1016/j.jhazmat.2016.07.040	Effects of Ag nanomaterials and Ag salt can be discriminated in a full life cycle long term test with Enchytraeus cryoticus	Bicho et al 2016 Effects of Ag nanomaterials and Ag salt can be discriminated in a full life cycle long term test with Enchytraeus cryoticus. Journal of Hazardous Materials 318, 608–614 .	AgNO3		Sigma-Aldrich	Suspension	Ag	7761-88-8	99	*	*	*	*	*	Unreported	Unreported	*	*	*	*	*	*	*	*	*	*	*	*	*	*	*	*	*	*	*	*	*	*	Solid	Natural media	LUFA 2.2	Light	16
105	SR	Article	Soil	Bicho	2016	10.1016/j.jhazmat.2016.07.040	Effects of Ag nanomaterials and Ag salt can be discriminated in a full life cycle long term test with Enchytraeus cryoticus	Bicho et al 2016 Effects of Ag nanomaterials and Ag salt can be discriminated in a full life cycle long term test with Enchytraeus cryoticus. Journal of Hazardous Materials 318, 608–614 .	AgNO3		Sigma-Aldrich	Suspension	Ag	7761-88-8	99	*	*	*	*	*	Unreported	Unreported	*	*	*	*	*	*	*	*	*	*	*	*	*	*	*	*	*	*	*	*	*	*	Solid	Natural media	LUFA 2.2	Light	16
106	SR	Article	Soil	Bicho	2016	10.1016/j.jhazmat.2016.07.040	Effects of Ag nanomaterials and Ag salt can be discriminated in a full life cycle long term test with Enchytraeus cryoticus	Bicho et al 2016 Effects of Ag nanomaterials and Ag salt can be discriminated in a full life cycle long term test with Enchytraeus cryoticus. Journal of Hazardous Materials 318, 608–614 .	AgNO3		Sigma-Aldrich	Suspension	Ag	7761-88-8	99	*	*	*	*	*	Unreported	Unreported	*	*	*	*	*	*	*	*	*	*	*	*	*	*	*	*	*	*	*	*	*	*	Solid	Natural media	LUFA 2.2	Light	16
107	SR	Article	Soil	Bicho	2016	10.1016/j.jhazmat.2016.07.040	Effects of Ag nanomaterials and Ag salt can be discriminated in a full life cycle long term test with Enchytraeus cryoticus	Bicho et al 2016 Effects of Ag nanomaterials and Ag salt can be discriminated in a full life cycle long term test with Enchytraeus cryoticus. Journal of Hazardous Materials 318, 608–614 .	AgNO3		Sigma-Aldrich	Suspension	Ag	7761-88-8	99	*	*	*	*	*	Unreported	Unreported	*	*	*	*	*	*	*	*	*	*	*	*	*	*	*	*	*	*	*	*	*	*	Solid	Natural media	LUFA 2.2	Light	16
108	SR	Article	Soil	Bicho	2016	10.1016/j.jhazmat.2016.07.040	Effects of Ag nanomaterials and Ag salt can be discriminated in a full life cycle long term test with Enchytraeus cryoticus	Bicho et al 2016 Effects of Ag nanomaterials and Ag salt can be discriminated in a full life cycle long term test with Enchytraeus cryoticus. Journal of Hazardous Materials 318, 608–614 .	AgNO3		Sigma-Aldrich	Suspension	Ag	7761-88-8	99	*	*	*	*	*	Unreported	Unreported	*	*	*	*	*	*	*	*	*	*	*	*	*	*	*	*	*	*	*	*	*	*	Solid	Natural media	LUFA 2.2	Light	16
109	SR	Article	Soil	Bicho	2016	10.1016/j.jhazmat.2016.07.040	Effects of Ag nanomaterials and Ag salt can be discriminated in a full life cycle long term test with Enchytraeus cryoticus	Bicho et al 2016 Effects of Ag nanomaterials and Ag salt can be discriminated in a full life cycle long term test with Enchytraeus cryoticus. Journal of Hazardous Materials 318, 608–614 .	AgNO3		Sigma-Aldrich	Suspension	Ag	7761-88-8	99	*	*	*	*	*	Unreported	Unreported	*	*	*	*	*	*	*	*	*	*	*	*	*	*	*	*	*	*	*	*	*	*	Solid	Natural media	LUFA 2.2	Light	16
110	SR	Article	Soil	Bicho	2016	10.1016/j.jhazmat.2016.07.040	Effects of Ag nanomaterials and Ag salt can be discriminated in a full life cycle long term test with Enchytraeus cryoticus	Bicho et al 2016 Effects of Ag nanomaterials and Ag salt can be discriminated in a full life cycle long term test with Enchytraeus cryoticus. Journal of Hazardous Materials 318, 608–614 .	AgNO3		Sigma-Aldrich	Suspension	Ag	7761-88-8	99	*	*	*	*	*	Unreported	Unreported	*	*	*	*	*	*	*	*	*	*	*	*	*	*	*	*	*	*	*	*	*	*	Solid	Natural media	LUFA 2.2	Light	16
111	SR	Article	Soil	Bicho	2016	10.1016/j.jhazmat.2016.07.040	Effects of Ag nanomaterials and Ag salt can be discriminated in a full life cycle long term test with Enchytraeus cryoticus	Bicho et al 2016 Effects of Ag nanomaterials and Ag salt can be discriminated in a full life cycle long term test with Enchytraeus cryoticus. Journal of Hazardous Materials 318, 608–614 .	AgNO3		Sigma-Aldrich	Suspension	Ag	7761-88-8	99	*	*	*	*	*	Unreported	Unreported	*	*	*	*	*	*	*	*	*	*	*	*	*	*	*	*	*	*	*	*	*	*	Solid	Natural media	LUFA 2.2	Light	16
112	SR	Article	Soil	Bicho	2016	10.1016/j.jhazmat.2016.07.040	Effects of Ag nanomaterials and Ag salt can be discriminated in a full life cycle long term test with Enchytraeus cryoticus	Bicho et al 2016 Effects of Ag nanomaterials and Ag salt can be discriminated in a full life cycle long term test with Enchytraeus cryoticus. Journal of Hazardous Materials 318, 608–614 .	AgNO3		Sigma-Aldrich	Suspension	Ag	7761-88-8	99	*	*	*	*	*	Unreported	Unreported	*	*	*	*	*	*	*	*	*	*	*	*	*	*	*	*	*	*	*	*	*	*	Solid	Natural media	LUFA 2.2	Light	16
113	SR	Article	Soil	Bicho	2016	10.1016/j.jhazmat.2016.07.040	Effects of Ag nanomaterials and Ag salt can be discriminated in a full life cycle long term test with Enchytraeus cryoticus	Bicho et al 2016 Effects of Ag nanomaterials and Ag salt can be discriminated in a full life cycle long term test with Enchytraeus cryoticus. Journal of Hazardous Materials 318, 608–614 .	AgNO3		Sigma-Aldrich	Suspension	Ag	7761-88-8	99	*	*	*	*	*	Unreported	Unreported	*	*	*	*	*	*	*	*	*	*	*	*	*	*	*	*	*	*	*	*	*	*	Solid	Natural media	LUFA 2.2	Light	16
114	SR	Article	Soil	Engelke	2014	10.1002/etc.2542	A miniaturized solid contact test with arthrobacter globiformis for the assessment of the environmental impact of silver nanoparticles	Engelke et al 2014 A miniaturized solid contact test with arthrobacter globiformis for the assessment of the environmental impact of silver nanoparticles. Environmental Toxicology and Chemistry, 33, 5, 1142–1147,	NM300K	AgNM	JRC	Suspension	Ag	*	*	89.8	Tween	9005-70-3	8% (4% each)	10.5	15	Below 20	*	*	TEM	38.1	Spheroidal	*	*	*	15	*	*	*	MilliQ Water and 10.2% of Ag in suspension	*	40	Mean	DLS	*	*	*	*	*	Solid	Natural media	RefeSol 01A	*	*
115	SR	Article	Soil	Engelke	2014	10.1002/etc.2542	A miniaturized solid contact test with arthrobacter globiformis for the assessment of the environmental impact of silver nanoparticles	Engelke et al 2014 A miniaturized solid contact test with arthrobacter globiformis for the assessment of the environmental impact of silver nanoparticles. Environmental Toxicology and Chemistry, 33, 5, 1142–1147,	AgNO3		*	Suspension	Ag	7761-88-8	*	*	*	*	*	*	Unreported	Unreported	*	*	*	*	*	*	*	*	*	*	*	*	*	*	*	*	*	*	*	*	*	*	Solid	Natural media	RefeSol 01A	*	*
116	SR	Article	Soil	Engelke	2014	10.1002/etc.2542	A miniaturized solid contact test with arthrobacter globiformis for the assessment of the environmental impact of silver nanoparticles	Engelke et al 2014 A miniaturized solid contact test with arthrobacter globiformis for the assessment of the environmental impact of silver nanoparticles. Environmental Toxicology and Chemistry, 33, 5, 1142–1147,	TiO2/AgxO		Synthesized in the laboratory of the Department of Product Engineering at the University of Bremen	Suspension	Ag	*	6.6	*	*	*	*	*	Unreported	Unreported	*	*	*	120	Spheroidal	*	*	*	*	*	3	*	*	*	*	*	*	*	*	*	*	*	Solid	Natural media	RefeSol 01A	*	*
117	SR	Article	Soil	Engelke	2014	10.1002/etc.2542	A miniaturized solid contact test with arthrobacter globiformis for the assessment of the environmental impact of silver nanoparticles	Engelke et al 2014 A miniaturized solid contact test with arthrobacter globiformis for the assessment of the environmental impact of silver nanoparticles. Environmental Toxicology and Chemistry, 33, 5, 1142–1147,	NM300K	AgNM	JRC	Suspension	Ag	*	*	89.8	Tween	9005-70-3	8% (4% each)	10.5	15	Below 20	*	*	TEM	38.1	Spheroidal	*	*	*	15	*	*	*	MilliQ Water and 10.2% of Ag in suspension	*	40	Mean	DLS	*	*	*	*	*	Liquid	Artificial	*	*	*
118	SR	Article	Soil	Engelke	2014	10.1002/etc.2542	A miniaturized solid contact test with arthrobacter globiformis for the assessment of the environmental impact of silver nanoparticles	Engelke et al 2014 A miniaturized solid contact test with arthrobacter globiformis for the assessment of the environmental impact of silver nanoparticles. Environmental Toxicology and Chemistry, 33, 5, 1142–1147,	AgNO3		*	Suspension	Ag	7761-88-8	*	*	*	*	*	*	Unreported	Unreported	*	*	*	*	*	*	*	*	*	*	*	*	*	*	*	*	*	*	*	*	*	*	Liquid	Artificial	*	*	*
119	SR	Article	Soil	Engelke	2014	10.1002/etc.2542	A miniaturized solid contact test with arthrobacter globiformis for the assessment of the environmental impact of silver nanoparticles	Engelke et al 2014 A miniaturized solid contact test with arthrobacter globiformis for the assessment of the environmental impact of silver nanoparticles. Environmental Toxicology and Chemistry, 33, 5, 1142–1147,	TiO2/AgxO		Synthesized in the laboratory of the Department of Product Engineering at the University of Bremen	Suspension	Ag	*	6.6	*	*	*	*	*	Unreported	Unreported	*	*	*	120	Spheroidal	*	*	*	*	*	3	*	*	*	*	*	*	*	*	*	*	*	Liquid	Artificial	*	*	*
126	SR	Article	Soil	Mendes	2015	10.3390/ijerph121012530	Ag nanoparticles (Ag NM300K) in the terrestrial environment: effects at population and cellular level in folsomia candida	Mendes et al 2015. Ag nanoparticles (Ag NM300K) in the terrestrial environment: effects at population and cellular level in folsomia candida. Int. J. Environ. Res. Public Health, 12, 12530-12542	AgNO3		Sigma-Aldrich	*	Ag	7761-88-8	*	0.1	*	*	*	*	Unreported	Unreported	*	*	*	*	*	*	*	*	*	*	*	*	*	*	*	*	*	*	*	*	*	*	Solid	Natural media	LUFA 2.2	Light	16
127	SR	Article	Soil	Mendes	2015	10.3390/ijerph121012530	Ag nanoparticles (Ag NM300K) in the terrestrial environment: effects at population and cellular level in folsomia candida	Mendes et al 2015. Ag nanoparticles (Ag NM300K) in the terrestrial environment: effects at population and cellular level in folsomia candida. Int. J. Environ. Res. Public Health, 12, 12530-12542	AgNO3		Sigma-Aldrich	*	Ag	7761-88-8	*	0.1	*	*	*	*	Unreported	Unreported	*	*	*	*	*	*	*	*	*	*	*	*	*	*	*	*	*	*	*	*	*	*	Solid	Natural media	LUFA 2.2	Light	16
128	SR	Article	Soil	Mendes	2015	10.3390/ijerph121012530	Ag nanoparticles (Ag NM300K) in the terrestrial environment: effects at population and cellular level in folsomia candida	Mendes et al 2015. Ag nanoparticles (Ag NM300K) in the terrestrial environment: effects at population and cellular level in folsomia candida. Int. J. Environ. Res. Public Health, 12, 12530-12542	AgNO3		Sigma-Aldrich	*	Ag	7761-88-8	*	0.1	*	*	*	*	Unreported	Unreported	*	*	*	*	*	*	*	*	*	*	*	*	*	*	*	*	*	*	*	*	*	*	Solid	Natural media	LUFA 2.2	Light	16
129	SR	Article	Soil	Mendes	2015	10.3390/ijerph121012530	Ag nanoparticles (Ag NM300K) in the terrestrial environment: effects at population and cellular level in folsomia candida	Mendes et al 2015. Ag nanoparticles (Ag NM300K) in the terrestrial environment: effects at population and cellular level in folsomia candida. Int. J. Environ. Res. Public Health, 12, 12530-12542	AgNO3		Sigma-Aldrich	*	Ag	7761-88-8	*	0.1	*	*	*	*	Unreported	Unreported	*	*	*	*	*	*	*	*	*	*	*	*	*	*	*	*	*	*	*	*	*	*	Solid	Natural media	LUFA 2.2	Light	16
130	SR	Article	Soil	Mendes	2015	10.3390/ijerph121012530	Ag nanoparticles (Ag NM300K) in the terrestrial environment: effects at population and cellular level in folsomia candida	Mendes et al 2015. Ag nanoparticles (Ag NM300K) in the terrestrial environment: effects at population and cellular level in folsomia candida. Int. J. Environ. Res. Public Health, 12, 12530-12542	AgNO3		Sigma-Aldrich	*	Ag	7761-88-8	*	0.1	*	*	*	*	Unreported	Unreported	*	*	*	*	*	*	*	*	*	*	*	*	*	*	*	*	*	*	*	*	*	*	Solid	Natural media	LUFA 2.2	Light	16
131	SR	Article	Soil	Mendes	2015	10.3390/ijerph121012530	Ag nanoparticles (Ag NM300K) in the terrestrial environment: effects at population and cellular level in folsomia candida	Mendes et al 2015. Ag nanoparticles (Ag NM300K) in the terrestrial environment: effects at population and cellular level in folsomia candida. Int. J. Environ. Res. Public Health, 12, 12530-12542	AgNO3		Sigma-Aldrich	*	Ag	7761-88-8	*	0.1	*	*	*	*	Unreported	Unreported	*	*	*	*	*	*	*	*	*	*	*	*	*	*	*	*	*	*	*	*	*	*	Solid	Natural media	LUFA 2.2	Light	16
132	SR	Article	Soil	Mendes	2015	10.3390/ijerph121012530	Ag nanoparticles (Ag NM300K) in the terrestrial environment: effects at population and cellular level in folsomia candida	Mendes et al 2015. Ag nanoparticles (Ag NM300K) in the terrestrial environment: effects at population and cellular level in folsomia candida. Int. J. Environ. Res. Public Health, 12, 12530-12542	AgNO3		Sigma-Aldrich	*	Ag	7761-88-8	*	0.1	*	*	*	*	Unreported	Unreported	*	*	*	*	*	*	*	*	*	*	*	*	*	*	*	*	*	*	*	*	*	*	Solid	Natural media	LUFA 2.2	Light	16
133	SR	Article	Soil	Mendes	2015	10.3390/ijerph121012530	Ag nanoparticles (Ag NM300K) in the terrestrial environment: effects at population and cellular level in folsomia candida	Mendes et al 2015. Ag nanoparticles (Ag NM300K) in the terrestrial environment: effects at population and cellular level in folsomia candida. Int. J. Environ. Res. Public Health, 12, 12530-12542	AgNO3		Sigma-Aldrich	*	Ag	7761-88-8	*	0.1	*	*	*	*	Unreported	Unreported	*	*	*	*	*	*	*	*	*	*	*	*	*	*	*	*	*	*	*	*	*	*	Solid	Natural media	LUFA 2.2	Light	16
134	SR	Article	Soil	Mendes	2015	10.3390/ijerph121012530	Ag nanoparticles (Ag NM300K) in the terrestrial environment: effects at population and cellular level in folsomia candida	Mendes et al 2015. Ag nanoparticles (Ag NM300K) in the terrestrial environment: effects at population and cellular level in folsomia candida. Int. J. Environ. Res. Public Health, 12, 12530-12542	NM300K	AgNM	JRC	Suspension	Ag	*	*	89.8	Tween	9005-70-3	8% (4% each)	*	17	Below 20	*	*	TEM	*	Spheroidal	*	*	*	17	TEM	5	*	MilliQ Water and 10.2% of Ag in suspension	*	52.31	Mean	NTA	*	*	*	*	*	Solid	Natural media	LUFA 2.2	Light	16
135	SR	Article	Soil	Mendes	2015	10.3390/ijerph121012530	Ag nanoparticles (Ag NM300K) in the terrestrial environment: effects at population and cellular level in folsomia candida	Mendes et al 2015. Ag nanoparticles (Ag NM300K) in the terrestrial environment: effects at population and cellular level in folsomia candida. Int. J. Environ. Res. Public Health, 12, 12530-12542	NM300K	AgNM	JRC	Suspension	Ag	*	*	89.8	Tween	9005-70-3	8% (4% each)	*	17	Below 20	*	*	TEM	*	Spheroidal	*	*	*	17	TEM	5	*	MilliQ Water and 10.2% of Ag in suspension	*	52.31	Mean	NTA	*	*	*	*	*	Solid	Natural media	LUFA 2.2	Light	16
136	SR	Article	Soil	Mendes	2015	10.3390/ijerph121012530	Ag nanoparticles (Ag NM300K) in the terrestrial environment: effects at population and cellular level in folsomia candida	Mendes et al 2015. Ag nanoparticles (Ag NM300K) in the terrestrial environment: effects at population and cellular level in folsomia candida. Int. J. Environ. Res. Public Health, 12, 12530-12542	NM300K	AgNM	JRC	Suspension	Ag	*	*	89.8	Tween	9005-70-3	8% (4% each)	*	17	Below 20	*	*	TEM	*	Spheroidal	*	*	*	17	TEM	5	*	MilliQ Water and 10.2% of Ag in suspension	*	52.31	Mean	NTA	*	*	*	*	*	Solid	Natural media	LUFA 2.2	Light	16
137	SR	Article	Soil	Mendes	2015	10.3390/ijerph121012530	Ag nanoparticles (Ag NM300K) in the terrestrial environment: effects at population and cellular level in folsomia candida	Mendes et al 2015. Ag nanoparticles (Ag NM300K) in the terrestrial environment: effects at population and cellular level in folsomia candida. Int. J. Environ. Res. Public Health, 12, 12530-12542	NM300K	AgNM	JRC	Suspension	Ag	*	*	89.8	Tween	9005-70-3	8% (4% each)	*	17	Below 20	*	*	TEM	*	Spheroidal	*	*	*	17	TEM	5	*	MilliQ Water and 10.2% of Ag in suspension	*	52.31	Mean	NTA	*	*	*	*	*	Solid	Natural media	LUFA 2.2	Light	16
138	SR	Article	Soil	Sillapawattana	2016	10.1186/s12302-016-0095-4	Effect of silver nanoparticles on the standard soil arthropod folsomia candida and the eukaryote model organism saccharomyces cerevisiae	Sillapawattana et al 2016. Effect of silver nanoparticles on the standard soil arthropod folsomia candida and the eukaryote model organism saccharomyces cerevisiae. Environ Sci Eur, 28, 27	AgNO3		*	Suspension	Ag	7761-88-8	*	*	*	*	*	*	Unreported	Unreported	*	*	*	*	*	*	*	*	*	*	*	*	*	*	*	*	*	*	*	*	*	*	Liquid	*	YPD algar plates	Dark	*
140	SR	Article	Soil	Rodrigues	2020	10.1016/j.envpol.2020.114277	Novel understanding of toxicity in a life cycle perspective - the mechanisms that lead to population effect - the case of Ag (nano) materials	Rodrigues et al 2020. Novel understanding of toxicity in a life cycle perspective - the mechanisms that lead to population effect - the case of Ag (nano) materials. Environmental Pollution, 262, 114277	AgNM	AgNM	AG-M-03M-NPCP.020N (American Elements)	Powder	Ag	*	99	*	PVP	9003-39-8	0.2	*	25	20-50	20	30	TEM	*	Spheroidal	*	*	*	*	*	*	*	MilliQ Water	For 30 mins	*	*	*	*	*	*	*	*	Solid	Natural media	LUFA 2.2	Light	16
141	SR	Article	Soil	Rodrigues	2020	10.1016/j.envpol.2020.114277	Novel understanding of toxicity in a life cycle perspective - the mechanisms that lead to population effect - the case of Ag (nano) materials	Rodrigues et al 2020. Novel understanding of toxicity in a life cycle perspective - the mechanisms that lead to population effect - the case of Ag (nano) materials. Environmental Pollution, 262, 114277	AgNM	AgNM	AG-M-03M-NPCP.020N (American Elements)	Powder	Ag	*	99	*	PVP	9003-39-8	0.2	*	25	20-50	20	30	TEM	*	Spheroidal	*	*	*	*	*	*	*	MilliQ Water	For 30 mins	*	*	*	*	*	*	*	*	Solid	Natural media	LUFA 2.2	Light	16
142	SR	Article	Soil	Rodrigues	2020	10.1016/j.envpol.2020.114277	Novel understanding of toxicity in a life cycle perspective - the mechanisms that lead to population effect - the case of Ag (nano) materials	Rodrigues et al 2020. Novel understanding of toxicity in a life cycle perspective - the mechanisms that lead to population effect - the case of Ag (nano) materials. Environmental Pollution, 262, 114277	AgNM	AgNM	AG-M-03M-NPCP.020N (American Elements)	Powder	Ag	*	99	*	PVP	9003-39-8	0.2	*	25	20-50	20	30	TEM	*	Spheroidal	*	*	*	*	*	*	*	MilliQ Water	For 30 mins	*	*	*	*	*	*	*	*	Solid	Natural media	LUFA 2.2	Light	16
143	SR	Article	Soil	Rodrigues	2020	10.1016/j.envpol.2020.114277	Novel understanding of toxicity in a life cycle perspective - the mechanisms that lead to population effect - the case of Ag (nano) materials	Rodrigues et al 2020. Novel understanding of toxicity in a life cycle perspective - the mechanisms that lead to population effect - the case of Ag (nano) materials. Environmental Pollution, 262, 114277	AgNM	AgNM	AG-M-03M-NPCP.020N (American Elements)	Powder	Ag	*	99	*	PVP	9003-39-8	0.2	*	25	20-50	20	30	TEM	*	Spheroidal	*	*	*	*	*	*	*	MilliQ Water	For 30 mins	*	*	*	*	*	*	*	*	Solid	Natural media	LUFA 2.2	Light	16
144	SR	Article	Soil	Rodrigues	2020	10.1016/j.envpol.2020.114277	Novel understanding of toxicity in a life cycle perspective - the mechanisms that lead to population effect - the case of Ag (nano) materials	Rodrigues et al 2020. Novel understanding of toxicity in a life cycle perspective - the mechanisms that lead to population effect - the case of Ag (nano) materials. Environmental Pollution, 262, 114277	AgNM	AgNM	AG-M-03M-NPCP.020N (American Elements)	Powder	Ag	*	99	*	Uncoated	*	*	*	25	20-50	20	30	TEM	*	Spheroidal	*	*	*	*	*	*	*	MilliQ Water	For 30 mins	*	*	*	*	*	*	*	*	Solid	Natural media	LUFA 2.2	Light	16
145	SR	Article	Soil	Rodrigues	2020	10.1016/j.envpol.2020.114277	Novel understanding of toxicity in a life cycle perspective - the mechanisms that lead to population effect - the case of Ag (nano) materials	Rodrigues et al 2020. Novel understanding of toxicity in a life cycle perspective - the mechanisms that lead to population effect - the case of Ag (nano) materials. Environmental Pollution, 262, 114277	AgNM	AgNM	AG-M-03M-NPCP.020N (American Elements)	Powder	Ag	*	99	*	Uncoated	*	*	*	25	20-50	20	30	TEM	*	Spheroidal	*	*	*	*	*	*	*	MilliQ Water	For 30 mins	*	*	*	*	*	*	*	*	Solid	Natural media	LUFA 2.2	Light	16
146	SR	Article	Soil	Rodrigues	2020	10.1016/j.envpol.2020.114277	Novel understanding of toxicity in a life cycle perspective - the mechanisms that lead to population effect - the case of Ag (nano) materials	Rodrigues et al 2020. Novel understanding of toxicity in a life cycle perspective - the mechanisms that lead to population effect - the case of Ag (nano) materials. Environmental Pollution, 262, 114277	AgNM	AgNM	AG-M-03M-NPCP.020N (American Elements)	Powder	Ag	*	99	*	Uncoated	*	*	*	25	20-50	20	30	TEM	*	Spheroidal	*	*	*	*	*	*	*	MilliQ Water	For 30 mins	*	*	*	*	*	*	*	*	Solid	Natural media	LUFA 2.2	Light	16
147	SR	Article	Soil	Rodrigues	2020	10.1016/j.envpol.2020.114277	Novel understanding of toxicity in a life cycle perspective - the mechanisms that lead to population effect - the case of Ag (nano) materials	Rodrigues et al 2020. Novel understanding of toxicity in a life cycle perspective - the mechanisms that lead to population effect - the case of Ag (nano) materials. Environmental Pollution, 262, 114277	AgNM	AgNM	AG-M-03M-NPCP.020N (American Elements)	Powder	Ag	*	99	*	Uncoated	*	*	*	25	20-50	20	30	TEM	*	Spheroidal	*	*	*	*	*	*	*	MilliQ Water	For 30 mins	*	*	*	*	*	*	*	*	Solid	Natural media	LUFA 2.2	Light	16
148	SR	Article	Soil	Rodrigues	2020	10.1016/j.envpol.2020.114277	Novel understanding of toxicity in a life cycle perspective - the mechanisms that lead to population effect - the case of Ag (nano) materials	Rodrigues et al 2020. Novel understanding of toxicity in a life cycle perspective - the mechanisms that lead to population effect - the case of Ag (nano) materials. Environmental Pollution, 262, 114277	NM300K	AgNM	JRC	Suspension	Ag	*	*	89.8	Tween	9005-70-3	8% (4% each)	*	15	Below 20	*	*	TEM	*	Spheroidal	*	*	*	*	*	*	*	MilliQ Water and 10.2% of Ag in suspension	*	52.31	Mean	NTA	*	*	*	*	*	Solid	Natural media	LUFA 2.2	Light	16
149	SR	Article	Soil	Rodrigues	2020	10.1016/j.envpol.2020.114277	Novel understanding of toxicity in a life cycle perspective - the mechanisms that lead to population effect - the case of Ag (nano) materials	Rodrigues et al 2020. Novel understanding of toxicity in a life cycle perspective - the mechanisms that lead to population effect - the case of Ag (nano) materials. Environmental Pollution, 262, 114277	NM300K	AgNM	JRC	Suspension	Ag	*	*	89.8	Tween	9005-70-3	8% (4% each)	*	15	Below 20	*	*	TEM	*	Spheroidal	*	*	*	*	*	*	*	MilliQ Water and 10.2% of Ag in suspension	*	52.31	Mean	NTA	*	*	*	*	*	Solid	Natural media	LUFA 2.2	Light	16
150	SR	Article	Soil	Rodrigues	2020	10.1016/j.envpol.2020.114277	Novel understanding of toxicity in a life cycle perspective - the mechanisms that lead to population effect - the case of Ag (nano) materials	Rodrigues et al 2020. Novel understanding of toxicity in a life cycle perspective - the mechanisms that lead to population effect - the case of Ag (nano) materials. Environmental Pollution, 262, 114277	NM300K	AgNM	JRC	Suspension	Ag	*	*	89.8	Tween	9005-70-3	8% (4% each)	*	15	Below 20	*	*	TEM	*	Spheroidal	*	*	*	*	*	*	*	MilliQ Water and 10.2% of Ag in suspension	*	52.31	Mean	NTA	*	*	*	*	*	Solid	Natural media	LUFA 2.2	Light	16
151	SR	Article	Soil	Rodrigues	2020	10.1016/j.envpol.2020.114277	Novel understanding of toxicity in a life cycle perspective - the mechanisms that lead to population effect - the case of Ag (nano) materials	Rodrigues et al 2020. Novel understanding of toxicity in a life cycle perspective - the mechanisms that lead to population effect - the case of Ag (nano) materials. Environmental Pollution, 262, 114277	NM300K	AgNM	JRC	Suspension	Ag	*	*	89.8	Tween	9005-70-3	8% (4% each)	*	15	Below 20	*	*	TEM	*	Spheroidal	*	*	*	*	*	*	*	MilliQ Water and 10.2% of Ag in suspension	*	52.31	Mean	NTA	*	*	*	*	*	Solid	Natural media	LUFA 2.2	Light	16
152	SR	Article	Soil	Rodrigues	2020	10.1016/j.envpol.2020.114277	Novel understanding of toxicity in a life cycle perspective - the mechanisms that lead to population effect - the case of Ag (nano) materials	Rodrigues et al 2020. Novel understanding of toxicity in a life cycle perspective - the mechanisms that lead to population effect - the case of Ag (nano) materials. Environmental Pollution, 262, 114277	AgNO3		Sigma-Aldrich	Powder	Ag	7761-88-8	*	*	*	*	*	*	Unreported	Unreported	*	*	*	*	*	*	*	*	*	*	*	*	*	*	*	*	*	*	*	*	*	*	Solid	Natural media	LUFA 2.2	Light	16
153	SR	Article	Soil	Rodrigues	2020	10.1016/j.envpol.2020.114277	Novel understanding of toxicity in a life cycle perspective - the mechanisms that lead to population effect - the case of Ag (nano) materials	Rodrigues et al 2020. Novel understanding of toxicity in a life cycle perspective - the mechanisms that lead to population effect - the case of Ag (nano) materials. Environmental Pollution, 262, 114277	AgNO3		Sigma-Aldrich	Powder	Ag	7761-88-8	*	*	*	*	*	*	Unreported	Unreported	*	*	*	*	*	*	*	*	*	*	*	*	*	*	*	*	*	*	*	*	*	*	Solid	Natural media	LUFA 2.2	Light	16
154	SR	Article	Soil	Rodrigues	2020	10.1016/j.envpol.2020.114277	Novel understanding of toxicity in a life cycle perspective - the mechanisms that lead to population effect - the case of Ag (nano) materials	Rodrigues et al 2020. Novel understanding of toxicity in a life cycle perspective - the mechanisms that lead to population effect - the case of Ag (nano) materials. Environmental Pollution, 262, 114277	AgNO3		Sigma-Aldrich	Powder	Ag	7761-88-8	*	*	*	*	*	*	Unreported	Unreported	*	*	*	*	*	*	*	*	*	*	*	*	*	*	*	*	*	*	*	*	*	*	Solid	Natural media	LUFA 2.2	Light	16
155	SR	Article	Soil	Rodrigues	2020	10.1016/j.envpol.2020.114277	Novel understanding of toxicity in a life cycle perspective - the mechanisms that lead to population effect - the case of Ag (nano) materials	Rodrigues et al 2020. Novel understanding of toxicity in a life cycle perspective - the mechanisms that lead to population effect - the case of Ag (nano) materials. Environmental Pollution, 262, 114277	AgNO3		Sigma-Aldrich	Powder	Ag	7761-88-8	*	*	*	*	*	*	Unreported	Unreported	*	*	*	*	*	*	*	*	*	*	*	*	*	*	*	*	*	*	*	*	*	*	Solid	Natural media	LUFA 2.2	Light	16
156	SR	Article	Soil	Rodrigues	2020	10.1016/j.envpol.2020.114277	Novel understanding of toxicity in a life cycle perspective - the mechanisms that lead to population effect - the case of Ag (nano) materials	Rodrigues et al 2020. Novel understanding of toxicity in a life cycle perspective - the mechanisms that lead to population effect - the case of Ag (nano) materials. Environmental Pollution, 262, 114277	AgNM	AgNM	AG-M-03M-NPCP.020N (American Elements)	Powder	Ag	*	99	*	PVP	9003-39-8	0.2	*	25	20-50	20	30	TEM	*	Spheroidal	*	*	*	*	*	*	*	MilliQ Water	For 30 mins	*	*	*	*	*	*	*	*	Solid	Natural media	LUFA 2.2	Light	16
157	SR	Article	Soil	Rodrigues	2020	10.1016/j.envpol.2020.114277	Novel understanding of toxicity in a life cycle perspective - the mechanisms that lead to population effect - the case of Ag (nano) materials	Rodrigues et al 2020. Novel understanding of toxicity in a life cycle perspective - the mechanisms that lead to population effect - the case of Ag (nano) materials. Environmental Pollution, 262, 114277	AgNM	AgNM	AG-M-03M-NPCP.020N (American Elements)	Powder	Ag	*	99	*	PVP	9003-39-8	0.2	*	25	20-50	20	30	TEM	*	Spheroidal	*	*	*	*	*	*	*	MilliQ Water	For 30 mins	*	*	*	*	*	*	*	*	Solid	Natural media	LUFA 2.2	Light	16
158	SR	Article	Soil	Rodrigues	2020	10.1016/j.envpol.2020.114277	Novel understanding of toxicity in a life cycle perspective - the mechanisms that lead to population effect - the case of Ag (nano) materials	Rodrigues et al 2020. Novel understanding of toxicity in a life cycle perspective - the mechanisms that lead to population effect - the case of Ag (nano) materials. Environmental Pollution, 262, 114277	AgNM	AgNM	AG-M-03M-NPCP.020N (American Elements)	Powder	Ag	*	99	*	PVP	9003-39-8	0.2	*	25	20-50	20	30	TEM	*	Spheroidal	*	*	*	*	*	*	*	MilliQ Water	For 30 mins	*	*	*	*	*	*	*	*	Solid	Natural media	LUFA 2.2	Light	16
159	SR	Article	Soil	Rodrigues	2020	10.1016/j.envpol.2020.114277	Novel understanding of toxicity in a life cycle perspective - the mechanisms that lead to population effect - the case of Ag (nano) materials	Rodrigues et al 2020. Novel understanding of toxicity in a life cycle perspective - the mechanisms that lead to population effect - the case of Ag (nano) materials. Environmental Pollution, 262, 114277	AgNM	AgNM	AG-M-03M-NPCP.020N (American Elements)	Powder	Ag	*	99	*	PVP	9003-39-8	0.2	*	25	20-50	20	30	TEM	*	Spheroidal	*	*	*	*	*	*	*	MilliQ Water	For 30 mins	*	*	*	*	*	*	*	*	Solid	Natural media	LUFA 2.2	Light	16
160	SR	Article	Soil	Rodrigues	2020	10.1016/j.envpol.2020.114277	Novel understanding of toxicity in a life cycle perspective - the mechanisms that lead to population effect - the case of Ag (nano) materials	Rodrigues et al 2020. Novel understanding of toxicity in a life cycle perspective - the mechanisms that lead to population effect - the case of Ag (nano) materials. Environmental Pollution, 262, 114277	AgNM	AgNM	AG-M-03M-NPCP.020N (American Elements)	Powder	Ag	*	99	*	Uncoated	*	*	*	25	20-50	20	30	TEM	*	Spheroidal	*	*	*	*	*	*	*	MilliQ Water	For 30 mins	*	*	*	*	*	*	*	*	Solid	Natural media	LUFA 2.2	Light	16
161	SR	Article	Soil	Rodrigues	2020	10.1016/j.envpol.2020.114277	Novel understanding of toxicity in a life cycle perspective - the mechanisms that lead to population effect - the case of Ag (nano) materials	Rodrigues et al 2020. Novel understanding of toxicity in a life cycle perspective - the mechanisms that lead to population effect - the case of Ag (nano) materials. Environmental Pollution, 262, 114277	AgNM	AgNM	AG-M-03M-NPCP.020N (American Elements)	Powder	Ag	*	99	*	Uncoated	*	*	*	25	20-50	20	30	TEM	*	Spheroidal	*	*	*	*	*	*	*	MilliQ Water	For 30 mins	*	*	*	*	*	*	*	*	Solid	Natural media	LUFA 2.2	Light	16
162	SR	Article	Soil	Rodrigues	2020	10.1016/j.envpol.2020.114277	Novel understanding of toxicity in a life cycle perspective - the mechanisms that lead to population effect - the case of Ag (nano) materials	Rodrigues et al 2020. Novel understanding of toxicity in a life cycle perspective - the mechanisms that lead to population effect - the case of Ag (nano) materials. Environmental Pollution, 262, 114277	AgNM	AgNM	AG-M-03M-NPCP.020N (American Elements)	Powder	Ag	*	99	*	Uncoated	*	*	*	25	20-50	20	30	TEM	*	Spheroidal	*	*	*	*	*	*	*	MilliQ Water	For 30 mins	*	*	*	*	*	*	*	*	Solid	Natural media	LUFA 2.2	Light	16
163	SR	Article	Soil	Rodrigues	2020	10.1016/j.envpol.2020.114277	Novel understanding of toxicity in a life cycle perspective - the mechanisms that lead to population effect - the case of Ag (nano) materials	Rodrigues et al 2020. Novel understanding of toxicity in a life cycle perspective - the mechanisms that lead to population effect - the case of Ag (nano) materials. Environmental Pollution, 262, 114277	AgNM	AgNM	AG-M-03M-NPCP.020N (American Elements)	Powder	Ag	*	99	*	Uncoated	*	*	*	25	20-50	20	30	TEM	*	Spheroidal	*	*	*	*	*	*	*	MilliQ Water	For 30 mins	*	*	*	*	*	*	*	*	Solid	Natural media	LUFA 2.2	Light	16
164	SR	Article	Soil	Rodrigues	2020	10.1016/j.envpol.2020.114277	Novel understanding of toxicity in a life cycle perspective - the mechanisms that lead to population effect - the case of Ag (nano) materials	Rodrigues et al 2020. Novel understanding of toxicity in a life cycle perspective - the mechanisms that lead to population effect - the case of Ag (nano) materials. Environmental Pollution, 262, 114277	NM300K	AgNM	JRC	Suspension	Ag	*	*	89.8	Tween	9005-70-3	8% (4% each)	*	15	Below 20	*	*	TEM	*	Spheroidal	*	*	*	*	*	*	*	MilliQ Water and 10.2% of Ag in suspension	*	52.31	Mean	NTA	*	*	*	*	*	Solid	Natural media	LUFA 2.2	Light	16
165	SR	Article	Soil	Rodrigues	2020	10.1016/j.envpol.2020.114277	Novel understanding of toxicity in a life cycle perspective - the mechanisms that lead to population effect - the case of Ag (nano) materials	Rodrigues et al 2020. Novel understanding of toxicity in a life cycle perspective - the mechanisms that lead to population effect - the case of Ag (nano) materials. Environmental Pollution, 262, 114277	NM300K	AgNM	JRC	Suspension	Ag	*	*	89.8	Tween	9005-70-3	8% (4% each)	*	15	Below 20	*	*	TEM	*	Spheroidal	*	*	*	*	*	*	*	MilliQ Water and 10.2% of Ag in suspension	*	52.31	Mean	NTA	*	*	*	*	*	Solid	Natural media	LUFA 2.2	Light	16
166	SR	Article	Soil	Rodrigues	2020	10.1016/j.envpol.2020.114277	Novel understanding of toxicity in a life cycle perspective - the mechanisms that lead to population effect - the case of Ag (nano) materials	Rodrigues et al 2020. Novel understanding of toxicity in a life cycle perspective - the mechanisms that lead to population effect - the case of Ag (nano) materials. Environmental Pollution, 262, 114277	NM300K	AgNM	JRC	Suspension	Ag	*	*	89.8	Tween	9005-70-3	8% (4% each)	*	15	Below 20	*	*	TEM	*	Spheroidal	*	*	*	*	*	*	*	MilliQ Water and 10.2% of Ag in suspension	*	52.31	Mean	NTA	*	*	*	*	*	Solid	Natural media	LUFA 2.2	Light	16
167	SR	Article	Soil	Rodrigues	2020	10.1016/j.envpol.2020.114277	Novel understanding of toxicity in a life cycle perspective - the mechanisms that lead to population effect - the case of Ag (nano) materials	Rodrigues et al 2020. Novel understanding of toxicity in a life cycle perspective - the mechanisms that lead to population effect - the case of Ag (nano) materials. Environmental Pollution, 262, 114277	AgNO3		Sigma-Aldrich	Powder	Ag	7761-88-8	99	1	*	*	*	*	Unreported	Unreported	*	*	TEM	*	*	*	*	*	*	*	*	*	*	*	*	*	*	*	*	*	*	*	Solid	Natural media	LUFA 2.2	Light	16
168	SR	Article	Soil	Rodrigues	2020	10.1016/j.envpol.2020.114277	Novel understanding of toxicity in a life cycle perspective - the mechanisms that lead to population effect - the case of Ag (nano) materials	Rodrigues et al 2020. Novel understanding of toxicity in a life cycle perspective - the mechanisms that lead to population effect - the case of Ag (nano) materials. Environmental Pollution, 262, 114277	AgNO3		Sigma-Aldrich	Powder	Ag	7761-88-8	99	1	*	*	*	*	Unreported	Unreported	*	*	*	*	*	*	*	*	*	*	*	*	*	*	*	*	*	*	*	*	*	*	Solid	Natural media	LUFA 2.2	Light	16
169	SR	Article	Soil	Rodrigues	2020	10.1016/j.envpol.2020.114277	Novel understanding of toxicity in a life cycle perspective - the mechanisms that lead to population effect - the case of Ag (nano) materials	Rodrigues et al 2020. Novel understanding of toxicity in a life cycle perspective - the mechanisms that lead to population effect - the case of Ag (nano) materials. Environmental Pollution, 262, 114277	AgNO3		Sigma-Aldrich	Powder	Ag	7761-88-8	99	1	*	*	*	*	Unreported	Unreported	*	*	*	*	*	*	*	*	*	*	*	*	*	*	*	*	*	*	*	*	*	*	Solid	Natural media	LUFA 2.2	Light	16
170	SR	Article	Soil	Rodrigues	2020	10.1016/j.envpol.2020.114277	Novel understanding of toxicity in a life cycle perspective - the mechanisms that lead to population effect - the case of Ag (nano) materials	Rodrigues et al 2020. Novel understanding of toxicity in a life cycle perspective - the mechanisms that lead to population effect - the case of Ag (nano) materials. Environmental Pollution, 262, 114277	AgNO3		Sigma-Aldrich	Powder	Ag	7761-88-8	99	1	*	*	*	*	Unreported	Unreported	*	*	*	*	*	*	*	*	*	*	*	*	*	*	*	*	*	*	*	*	*	*	Solid	Natural media	LUFA 2.2	Light	16
171	SR	Article	Soil	Van der Ploeg	2014	10.1002/etc.2487	Effects of silver nanoparticles (NM300K) on lumbricus rubellus earthworms and particle characterization in relevant test matrices including soil	Van der Ploeg 2014. Effects of silver nanoparticles (NM300K) on lumbricus rubellus earthworms and particle characterization in relevant test matrices including soil. Environmental Toxicology and Chemistry, 33, 4, 743-752	NM300K	AgNM	Mercator GmbH	Suspension	Ag	*	*	89.8	Tween	9005-70-3	8% (4% each)	*	15	Below 20	*	*	TEM	*	Spheroidal	*	*	*	*	*	*	*	MilliQ Water and 10.2% of Ag in suspension	*	50	Mean	DLS	*	*	*	-25	*	Solid	Natural media	*	Light	24
172	SR	Article	Soil	Van der Ploeg	2014	10.1002/etc.2487	Effects of silver nanoparticles (NM300K) on lumbricus rubellus earthworms and particle characterization in relevant test matrices including soil	Van der Ploeg 2014. Effects of silver nanoparticles (NM300K) on lumbricus rubellus earthworms and particle characterization in relevant test matrices including soil. Environmental Toxicology and Chemistry, 33, 4, 743-752	NM300K	AgNM	Mercator GmbH	Suspension	Ag	*	*	89.8	Tween	9005-70-3	8% (4% each)	*	15	Below 20	*	*	TEM	*	Spheroidal	*	*	*	*	*	*	*	MilliQ Water and 10.2% of Ag in suspension	*	50	Mean	DLS	*	*	*	-25	*	Solid	Natural media	*	Light	24
173	SR	Article	Soil	Van der Ploeg	2014	10.1002/etc.2487	Effects of silver nanoparticles (NM300K) on lumbricus rubellus earthworms and particle characterization in relevant test matrices including soil	Van der Ploeg 2014. Effects of silver nanoparticles (NM300K) on lumbricus rubellus earthworms and particle characterization in relevant test matrices including soil. Environmental Toxicology and Chemistry, 33, 4, 743-752	NM300K	AgNM	Mercator GmbH	Suspension	Ag	*	*	89.8	Tween	9005-70-3	8% (4% each)	*	15	Below 20	*	*	TEM	*	Spheroidal	*	*	*	*	*	*	*	MilliQ Water and 10.2% of Ag in suspension	*	50	Mean	DLS	*	*	*	-25	*	Solid	Natural media	*	Light	24
174	SR	Article	Soil	Van der Ploeg	2014	10.1002/etc.2487	Effects of silver nanoparticles (NM300K) on lumbricus rubellus earthworms and particle characterization in relevant test matrices including soil	Van der Ploeg 2014. Effects of silver nanoparticles (NM300K) on lumbricus rubellus earthworms and particle characterization in relevant test matrices including soil. Environmental Toxicology and Chemistry, 33, 4, 743-752	NM300K	AgNM	Mercator GmbH	Suspension	Ag	*	*	89.8	Tween	9005-70-3	8% (4% each)	*	15	Below 20	*	*	TEM	*	Spheroidal	*	*	*	*	*	*	*	MilliQ Water and 10.2% of Ag in suspension	*	50	Mean	DLS	*	*	*	-25	*	Solid	Natural media	*	Light	24
175	SR	Article	Soil	Van der Ploeg	2014	10.1002/etc.2487	Effects of silver nanoparticles (NM300K) on lumbricus rubellus earthworms and particle characterization in relevant test matrices including soil	Van der Ploeg 2014. Effects of silver nanoparticles (NM300K) on lumbricus rubellus earthworms and particle characterization in relevant test matrices including soil. Environmental Toxicology and Chemistry, 33, 4, 743-752	NM300K	AgNM	Mercator GmbH	Suspension	Ag	*	*	89.8	Tween	9005-70-3	8% (4% each)	*	15	Below 20	*	*	TEM	*	Spheroidal	*	*	*	*	*	*	*	MilliQ Water and 10.2% of Ag in suspension	*	50	Mean	DLS	*	*	*	-25	*	Solid	Natural media	*	Light	24
176	SR	Article	Soil	Van der Ploeg	2014	10.1002/etc.2487	Effects of silver nanoparticles (NM300K) on lumbricus rubellus earthworms and particle characterization in relevant test matrices including soil	Van der Ploeg 2014. Effects of silver nanoparticles (NM300K) on lumbricus rubellus earthworms and particle characterization in relevant test matrices including soil. Environmental Toxicology and Chemistry, 33, 4, 743-752	NM300K	AgNM	Mercator GmbH	Suspension	Ag	*	*	89.8	Tween	9005-70-3	8% (4% each)	*	15	Below 20	*	*	TEM	*	Spheroidal	*	*	*	*	*	*	*	MilliQ Water and 10.2% of Ag in suspension	*	50	Mean	DLS	*	*	*	-25	*	Solid	Natural media	*	Light	24
177	SR	Article	Soil	Van der Ploeg	2014	10.1002/etc.2487	Effects of silver nanoparticles (NM300K) on lumbricus rubellus earthworms and particle characterization in relevant test matrices including soil	Van der Ploeg 2014. Effects of silver nanoparticles (NM300K) on lumbricus rubellus earthworms and particle characterization in relevant test matrices including soil. Environmental Toxicology and Chemistry, 33, 4, 743-752	AgNO3		Merck KGaA	Powder	Ag	7761-88-8	*	*	*	*	*	*	Unreported	Unreported	*	*	*	*	*	*	*	*	*	*	*	*	*	*	*	*	*	*	*	*	*	*	Solid	Natural media	*	Light	24
178	SR	Article	Soil	Van der Ploeg	2014	10.1002/etc.2487	Effects of silver nanoparticles (NM300K) on lumbricus rubellus earthworms and particle characterization in relevant test matrices including soil	Van der Ploeg 2014. Effects of silver nanoparticles (NM300K) on lumbricus rubellus earthworms and particle characterization in relevant test matrices including soil. Environmental Toxicology and Chemistry, 33, 4, 743-752	AgNO3		Merck KGaA	Powder	Ag	7761-88-8	*	*	*	*	*	*	Unreported	Unreported	*	*	*	*	*	*	*	*	*	*	*	*	*	*	*	*	*	*	*	*	*	*	Solid	Natural media	*	Light	24
179	SR	Article	Soil	Schlich	2015	10.1016/j.envpol.2018.07.082	Long-term effects of three different silver sulfide nanomaterials, silver nitrate and bulk silver sulfide on soil microorganisms and plants	Schlich et al 2015. Long-term effects of three different silver sulfide nanomaterials, silver nitrate and bulk silver sulfide on soil microorganisms and plants. Environmental Pollution, 242, 1850-1859	NM300K	AgNM	JRC	Suspension	Ag2S	*	*	89.8	Tween	9005-70-3	8% (4% each)	*	15	Below 20	*	*	TEM	*	Spheroidal	*	*	*	*	*	*	*	MilliQ Water and 10.2% of Ag in suspension	*	52.31	Mean	NTA	*	*	*	*	*	Solid	Artificial	RefeSol 01A	Dark	*
180	SR	Article	Soil	Schlich	2015	10.1016/j.envpol.2018.07.082	Long-term effects of three different silver sulfide nanomaterials, silver nitrate and bulk silver sulfide on soil microorganisms and plants	Schlich et al 2015. Long-term effects of three different silver sulfide nanomaterials, silver nitrate and bulk silver sulfide on soil microorganisms and plants. Environmental Pollution, 242, 1850-1859	NM300k	AgNM	JRC	Suspension	Ag2S	*	*	89.8	Tween	9005-70-3	8% (4% each)	*	15	Below 20	*	*	TEM	*	Spheroidal	*	*	*	*	*	*	*	MilliQ Water and 10.2% of Ag in suspension	*	52.31	Mean	NTA	*	*	*	*	*	Solid	Artificial	RefeSol 01A	Dark	*
181	SR	Article	Soil	Schlich	2015	10.1016/j.envpol.2018.07.082	Long-term effects of three different silver sulfide nanomaterials, silver nitrate and bulk silver sulfide on soil microorganisms and plants	Schlich et al 2015. Long-term effects of three different silver sulfide nanomaterials, silver nitrate and bulk silver sulfide on soil microorganisms and plants. Environmental Pollution, 242, 1850-1859	NM300K	AgNM	JRC	Suspension	Ag2S	*	*	89.8	Tween	9005-70-3	8% (4% each)	*	15	Below 20	*	*	TEM	*	Spheroidal	*	*	*	*	*	*	*	MilliQ Water and 10.2% of Ag in suspension	*	52.31	Mean	NTA	*	*	*	*	*	Solid	Artificial	RefeSol 01A	Dark	*
182	SR	Article	Soil	Schlich	2015	10.1016/j.envpol.2018.07.082	Long-term effects of three different silver sulfide nanomaterials, silver nitrate and bulk silver sulfide on soil microorganisms and plants	Schlich et al 2015. Long-term effects of three different silver sulfide nanomaterials, silver nitrate and bulk silver sulfide on soil microorganisms and plants. Environmental Pollution, 242, 1850-1859	Ag2S		Sigma-Aldrich	Powder	Ag2S	21548-73-2	*	*	*	*	*	*	Unreported	Unreported	*	*	*	*	*	*	*	*	*	*	*	*	*	*	*	*	*	*	*	*	*	*	Solid	Artificial	RefeSol 01A	Dark	*
183	SR	Article	Soil	Schlich	2015	10.1016/j.envpol.2018.07.082	Long-term effects of three different silver sulfide nanomaterials, silver nitrate and bulk silver sulfide on soil microorganisms and plants	Schlich et al 2015. Long-term effects of three different silver sulfide nanomaterials, silver nitrate and bulk silver sulfide on soil microorganisms and plants. Environmental Pollution, 242, 1850-1859	Ag2S		Sigma-Aldrich	Powder	Ag2S	21548-73-2	*	*	*	*	*	*	Unreported	Unreported	*	*	*	*	*	*	*	*	*	*	*	*	*	*	*	*	*	*	*	*	*	*	Solid	Artificial	RefeSol 01A	Dark	*
184	SR	Article	Soil	Schlich	2015	10.1016/j.envpol.2018.07.082	Long-term effects of three different silver sulfide nanomaterials, silver nitrate and bulk silver sulfide on soil microorganisms and plants	Schlich et al 2015. Long-term effects of three different silver sulfide nanomaterials, silver nitrate and bulk silver sulfide on soil microorganisms and plants. Environmental Pollution, 242, 1850-1859	Ag2S		Sigma-Aldrich	Powder	Ag2S	21548-73-2	*	*	*	*	*	*	Unreported	Unreported	*	*	*	*	*	*	*	*	*	*	*	*	*	*	*	*	*	*	*	*	*	*	Solid	Artificial	RefeSol 01A	Dark	*
185	SR	Article	Soil	Schlich	2015	10.1016/j.envpol.2018.07.082	Long-term effects of three different silver sulfide nanomaterials, silver nitrate and bulk silver sulfide on soil microorganisms and plants	Schlich et al 2015. Long-term effects of three different silver sulfide nanomaterials, silver nitrate and bulk silver sulfide on soil microorganisms and plants. Environmental Pollution, 242, 1850-1859	Ag2S		Sigma-Aldrich	Powder	Ag2S	21548-73-2	*	*	*	*	*	*	Unreported	Unreported	*	*	*	*	*	*	*	*	*	*	*	*	*	*	*	*	*	*	*	*	*	*	Solid	Artificial	RefeSol 01A	Dark	*
186	SR	Article	Soil	Schlich	2015	10.1016/j.envpol.2018.07.082	Long-term effects of three different silver sulfide nanomaterials, silver nitrate and bulk silver sulfide on soil microorganisms and plants	Schlich et al 2015. Long-term effects of three different silver sulfide nanomaterials, silver nitrate and bulk silver sulfide on soil microorganisms and plants. Environmental Pollution, 242, 1850-1859	Ag2S		Sigma-Aldrich	Powder	Ag2S	21548-73-2	*	*	*	*	*	*	Unreported	Unreported	*	*	*	*	*	*	*	*	*	*	*	*	*	*	*	*	*	*	*	*	*	*	Solid	Artificial	RefeSol 01A	Dark	*
187	SR	Article	Soil	Schlich	2015	10.1016/j.envpol.2018.07.082	Long-term effects of three different silver sulfide nanomaterials, silver nitrate and bulk silver sulfide on soil microorganisms and plants	Schlich et al 2015. Long-term effects of three different silver sulfide nanomaterials, silver nitrate and bulk silver sulfide on soil microorganisms and plants. Environmental Pollution, 242, 1850-1859	Ag2S		Sigma-Aldrich	Powder	Ag2S	21548-73-2	*	*	*	*	*	*	Unreported	Unreported	*	*	*	*	*	*	*	*	*	*	*	*	*	*	*	*	*	*	*	*	*	*	Solid	Artificial	RefeSol 01A	Dark	*
193	SR	Article	Soil	Schlich	2015	10.1016/j.envpol.2018.07.082	Long-term effects of three different silver sulfide nanomaterials, silver nitrate and bulk silver sulfide on soil microorganisms and plants	Schlich et al 2015. Long-term effects of three different silver sulfide nanomaterials, silver nitrate and bulk silver sulfide on soil microorganisms and plants. Environmental Pollution, 242, 1850-1859	NM300K	AgNM	JRC	Suspension	Ag2S	*	*	89.8	Tween	9005-70-3	8% (4% each)	*	15	Below 20	*	*	TEM	*	Spheroidal	*	*	*	*	*	*	*	MilliQ Water and 10.2% of Ag in suspension	*	52.31	Mean	NTA	*	*	*	*	*	Solid	Artificial	RefeSol 01A	Dark	*
194	SR	Article	Soil	Schlich	2015	10.1016/j.envpol.2018.07.082	Long-term effects of three different silver sulfide nanomaterials, silver nitrate and bulk silver sulfide on soil microorganisms and plants	Schlich et al 2015. Long-term effects of three different silver sulfide nanomaterials, silver nitrate and bulk silver sulfide on soil microorganisms and plants. Environmental Pollution, 242, 1850-1859	NM300K	AgNM	JRC	Suspension	Ag2S	*	*	89.8	Tween	9005-70-3	8% (4% each)	*	15	Below 20	*	*	TEM	*	Spheroidal	*	*	*	*	*	*	*	MilliQ Water and 10.2% of Ag in suspension	*	52.31	Mean	NTA	*	*	*	*	*	Solid	Artificial	RefeSol 01A	Dark	*
195	SR	Article	Soil	Schlich	2015	10.1016/j.envpol.2018.07.082	Long-term effects of three different silver sulfide nanomaterials, silver nitrate and bulk silver sulfide on soil microorganisms and plants	Schlich et al 2015. Long-term effects of three different silver sulfide nanomaterials, silver nitrate and bulk silver sulfide on soil microorganisms and plants. Environmental Pollution, 242, 1850-1859	NM300K	AgNM	JRC	Suspension	Ag2S	*	*	89.8	Tween	9005-70-3	8% (4% each)	*	15	Below 20	*	*	TEM	*	Spheroidal	*	*	*	*	*	*	*	MilliQ Water and 10.2% of Ag in suspension	*	52.31	Mean	NTA	*	*	*	*	*	Solid	Artificial	RefeSol 01A	Dark	*
196	SR	Article	Soil	Schlich	2015	10.1016/j.envpol.2018.07.082	Long-term effects of three different silver sulfide nanomaterials, silver nitrate and bulk silver sulfide on soil microorganisms and plants	Schlich et al 2015. Long-term effects of three different silver sulfide nanomaterials, silver nitrate and bulk silver sulfide on soil microorganisms and plants. Environmental Pollution, 242, 1850-1859	Ag2S		Sigma-Aldrich	Powder	Ag2S	21548-73-2	*	*	*	*	*	*	Unreported	Unreported	*	*	*	*	*	*	*	*	*	*	*	*	*	*	*	*	*	*	*	*	*	*	Solid	Artificial	RefeSol 01A	Dark	*
202	SR	Article	Soil	Schlich	2015	10.1016/j.envpol.2018.07.082	Long-term effects of three different silver sulfide nanomaterials, silver nitrate and bulk silver sulfide on soil microorganisms and plants	Schlich et al 2015. Long-term effects of three different silver sulfide nanomaterials, silver nitrate and bulk silver sulfide on soil microorganisms and plants. Environmental Pollution, 242, 1850-1859	NM300K	AgNM	JRC	Suspension	Ag2S	*	*	89.8	Tween	9005-70-3	8% (4% each)	*	15	Below 20	*	*	TEM	*	Spheroidal	*	*	*	*	*	*	*	MilliQ Water and 10.2% of Ag in suspension	*	52.31	Mean	NTA	*	*	*	*	*	Solid	Artificial	RefeSol 01A	Dark	*
203	SR	Article	Soil	Schlich	2015	10.1016/j.envpol.2018.07.082	Long-term effects of three different silver sulfide nanomaterials, silver nitrate and bulk silver sulfide on soil microorganisms and plants	Schlich et al 2015. Long-term effects of three different silver sulfide nanomaterials, silver nitrate and bulk silver sulfide on soil microorganisms and plants. Environmental Pollution, 242, 1850-1859	NM300K	AgNM	JRC	Suspension	Ag2S	*	*	89.8	Tween	9005-70-3	8% (4% each)	*	15	Below 20	*	*	TEM	*	Spheroidal	*	*	*	*	*	*	*	MilliQ Water and 10.2% of Ag in suspension	*	52.31	Mean	NTA	*	*	*	*	*	Solid	Artificial	RefeSol 01A	Dark	*
204	SR	Article	Soil	Schlich	2015	10.1016/j.envpol.2018.07.082	Long-term effects of three different silver sulfide nanomaterials, silver nitrate and bulk silver sulfide on soil microorganisms and plants	Schlich et al 2015. Long-term effects of three different silver sulfide nanomaterials, silver nitrate and bulk silver sulfide on soil microorganisms and plants. Environmental Pollution, 242, 1850-1859	NM300K	AgNM	JRC	Suspension	Ag2S	*	*	89.8	Tween	9005-70-3	8% (4% each)	*	15	Below 20	*	*	TEM	*	Spheroidal	*	*	*	*	*	*	*	MilliQ Water and 10.2% of Ag in suspension	*	52.31	Mean	NTA	*	*	*	*	*	Solid	Artificial	RefeSol 01A	Dark	*
205	SR	Article	Soil	Schlich	2015	10.1016/j.envpol.2018.07.082	Long-term effects of three different silver sulfide nanomaterials, silver nitrate and bulk silver sulfide on soil microorganisms and plants	Schlich et al 2015. Long-term effects of three different silver sulfide nanomaterials, silver nitrate and bulk silver sulfide on soil microorganisms and plants. Environmental Pollution, 242, 1850-1859	NM300K	AgNM	JRC	Suspension	Ag2S	*	*	89.8	Tween	9005-70-3	8% (4% each)	*	15	Below 20	*	*	TEM	*	Spheroidal	*	*	*	*	*	*	*	MilliQ Water and 10.2% of Ag in suspension	*	52.31	Mean	NTA	*	*	*	*	*	Solid	Artificial	RefeSol 01A	Dark	*
206	SR	Article	Soil	Schlich	2015	10.1016/j.envpol.2018.07.082	Long-term effects of three different silver sulfide nanomaterials, silver nitrate and bulk silver sulfide on soil microorganisms and plants	Schlich et al 2015. Long-term effects of three different silver sulfide nanomaterials, silver nitrate and bulk silver sulfide on soil microorganisms and plants. Environmental Pollution, 242, 1850-1859	Ag2S		Sigma-Aldrich	Powder	Ag2S	21548-73-2	*	*	*	*	*	*	Unreported	Unreported	*	*	*	*	*	*	*	*	*	*	*	*	*	*	*	*	*	*	*	*	*	*	Solid	Artificial	RefeSol 01A	Dark	*
207	SR	Article	Soil	Schlich	2015	10.1016/j.envpol.2018.07.082	Long-term effects of three different silver sulfide nanomaterials, silver nitrate and bulk silver sulfide on soil microorganisms and plants	Schlich et al 2015. Long-term effects of three different silver sulfide nanomaterials, silver nitrate and bulk silver sulfide on soil microorganisms and plants. Environmental Pollution, 242, 1850-1859	AgNO3		Sigma-Aldrich	Suspension	Ag2S	7761-88-8	*	*	*	*	*	*	Unreported	Unreported	*	*	*	*	*	*	*	*	*	*	*	*	*	*	*	*	*	*	*	*	*	*	Solid	Artificial	RefeSol 01A	Dark	*
208	SR	Article	Soil	Schlich	2015	10.1016/j.envpol.2018.07.082	Long-term effects of three different silver sulfide nanomaterials, silver nitrate and bulk silver sulfide on soil microorganisms and plants	Schlich et al 2015. Long-term effects of three different silver sulfide nanomaterials, silver nitrate and bulk silver sulfide on soil microorganisms and plants. Environmental Pollution, 242, 1850-1859	NM300k	AgNM	JRC	Suspension	Ag2S	*	*	89.8	Tween	9005-70-3	8% (4% each)	*	15	Below 20	*	*	TEM	*	Spheroidal	*	*	*	*	*	*	*	MilliQ Water and 10.2% of Ag in suspension	*	52.31	Mean	NTA	*	*	*	*	*	Solid	Artificial	RefeSol 01A	Dark	*
209	SR	Article	Soil	Schlich	2015	10.1016/j.envpol.2018.07.082	Long-term effects of three different silver sulfide nanomaterials, silver nitrate and bulk silver sulfide on soil microorganisms and plants	Schlich et al 2015. Long-term effects of three different silver sulfide nanomaterials, silver nitrate and bulk silver sulfide on soil microorganisms and plants. Environmental Pollution, 242, 1850-1859	Ag2S		Sigma-Aldrich	Powder	Ag2S	21548-73-2	*	*	*	*	*	*	Unreported	Unreported	*	*	*	*	*	*	*	*	*	*	*	*	*	*	*	*	*	*	*	*	*	*	Solid	Artificial	RefeSol 01A	Dark	*
215	SR	Article	Soil	Schlich	2015	10.1016/j.envpol.2018.07.082	Long-term effects of three different silver sulfide nanomaterials, silver nitrate and bulk silver sulfide on soil microorganisms and plants	Schlich et al 2015. Long-term effects of three different silver sulfide nanomaterials, silver nitrate and bulk silver sulfide on soil microorganisms and plants. Environmental Pollution, 242, 1850-1859	NM300K	AgNM	JRC	Suspension	Ag2S	*	*	89.8	Tween	9005-70-3	8% (4% each)	*	15	Below 20	*	*	TEM	*	Spheroidal	*	*	*	*	*	*	*	MilliQ Water and 10.2% of Ag in suspension	*	52.31	Mean	NTA	*	*	*	*	*	Solid	Artificial	RefeSol 01A	Dark	*
216	SR	Article	Soil	Schlich	2015	10.1016/j.envpol.2018.07.082	Long-term effects of three different silver sulfide nanomaterials, silver nitrate and bulk silver sulfide on soil microorganisms and plants	Schlich et al 2015. Long-term effects of three different silver sulfide nanomaterials, silver nitrate and bulk silver sulfide on soil microorganisms and plants. Environmental Pollution, 242, 1850-1859	NM300K	AgNM	JRC	Suspension	Ag2S	*	*	89.8	Tween	9005-70-3	8% (4% each)	*	15	Below 20	*	*	TEM	*	Spheroidal	*	*	*	*	*	*	*	MilliQ Water and 10.2% of Ag in suspension	*	52.31	Mean	NTA	*	*	*	*	*	Solid	Artificial	RefeSol 01A	Dark	*
217	SR	Article	Soil	Schlich	2015	10.1016/j.envpol.2018.07.082	Long-term effects of three different silver sulfide nanomaterials, silver nitrate and bulk silver sulfide on soil microorganisms and plants	Schlich et al 2015. Long-term effects of three different silver sulfide nanomaterials, silver nitrate and bulk silver sulfide on soil microorganisms and plants. Environmental Pollution, 242, 1850-1859	NM300K	AgNM	JRC	Suspension	Ag2S	*	*	89.8	Tween	9005-70-3	8% (4% each)	*	15	Below 20	*	*	TEM	*	Spheroidal	*	*	*	*	*	*	*	MilliQ Water and 10.2% of Ag in suspension	*	52.31	Mean	NTA	*	*	*	*	*	Solid	Artificial	RefeSol 01A	Dark	*
218	SR	Article	Soil	Schlich	2015	10.1016/j.envpol.2018.07.082	Long-term effects of three different silver sulfide nanomaterials, silver nitrate and bulk silver sulfide on soil microorganisms and plants	Schlich et al 2015. Long-term effects of three different silver sulfide nanomaterials, silver nitrate and bulk silver sulfide on soil microorganisms and plants. Environmental Pollution, 242, 1850-1859	NM300K	AgNM	JRC	Suspension	Ag2S	*	*	89.8	Tween	9005-70-3	8% (4% each)	*	15	Below 20	*	*	TEM	*	Spheroidal	*	*	*	*	*	*	*	MilliQ Water and 10.2% of Ag in suspension	*	52.31	Mean	NTA	*	*	*	*	*	Solid	Artificial	RefeSol 01A	Dark	*
219	SR	Article	Soil	Schlich	2015	10.1016/j.envpol.2018.07.082	Long-term effects of three different silver sulfide nanomaterials, silver nitrate and bulk silver sulfide on soil microorganisms and plants	Schlich et al 2015. Long-term effects of three different silver sulfide nanomaterials, silver nitrate and bulk silver sulfide on soil microorganisms and plants. Environmental Pollution, 242, 1850-1859	NM300K	AgNM	JRC	Suspension	Ag2S	*	*	89.8	Tween	9005-70-3	8% (4% each)	*	15	Below 20	*	*	TEM	*	Spheroidal	*	*	*	*	*	*	*	MilliQ Water and 10.2% of Ag in suspension	*	52.31	Mean	NTA	*	*	*	*	*	Solid	Artificial	RefeSol 01A	Dark	*
220	SR	Article	Soil	Schlich	2015	10.1016/j.envpol.2018.07.082	Long-term effects of three different silver sulfide nanomaterials, silver nitrate and bulk silver sulfide on soil microorganisms and plants	Schlich et al 2015. Long-term effects of three different silver sulfide nanomaterials, silver nitrate and bulk silver sulfide on soil microorganisms and plants. Environmental Pollution, 242, 1850-1859	NM300K	AgNM	JRC	Suspension	Ag2S	*	*	89.8	Tween	9005-70-3	8% (4% each)	*	15	Below 20	*	*	TEM	*	Spheroidal	*	*	*	*	*	*	*	MilliQ Water and 10.2% of Ag in suspension	*	52.31	Mean	NTA	*	*	*	*	*	Solid	Artificial	RefeSol 01A	Dark	*
221	SR	Article	Soil	Schlich	2015	10.1016/j.envpol.2018.07.082	Long-term effects of three different silver sulfide nanomaterials, silver nitrate and bulk silver sulfide on soil microorganisms and plants	Schlich et al 2015. Long-term effects of three different silver sulfide nanomaterials, silver nitrate and bulk silver sulfide on soil microorganisms and plants. Environmental Pollution, 242, 1850-1859	NM300K	AgNM	JRC	Suspension	Ag2S	*	*	89.8	Tween	9005-70-3	8% (4% each)	*	15	Below 20	*	*	TEM	*	Spheroidal	*	*	*	*	*	*	*	MilliQ Water and 10.2% of Ag in suspension	*	52.31	Mean	NTA	*	*	*	*	*	Solid	Artificial	RefeSol 01A	Dark	*
222	SR	Article	Soil	Schlich	2015	10.1016/j.envpol.2018.07.082	Long-term effects of three different silver sulfide nanomaterials, silver nitrate and bulk silver sulfide on soil microorganisms and plants	Schlich et al 2015. Long-term effects of three different silver sulfide nanomaterials, silver nitrate and bulk silver sulfide on soil microorganisms and plants. Environmental Pollution, 242, 1850-1859	NM300K	AgNM	JRC	Suspension	Ag2S	*	*	89.8	Tween	9005-70-3	8% (4% each)	*	15	Below 20	*	*	TEM	*	Spheroidal	*	*	*	*	*	*	*	MilliQ Water and 10.2% of Ag in suspension	*	52.31	Mean	NTA	*	*	*	*	*	Solid	Artificial	RefeSol 01A	Dark	*
223	SR	Article	Soil	Schlich	2015	10.1016/j.envpol.2018.07.082	Long-term effects of three different silver sulfide nanomaterials, silver nitrate and bulk silver sulfide on soil microorganisms and plants	Schlich et al 2015. Long-term effects of three different silver sulfide nanomaterials, silver nitrate and bulk silver sulfide on soil microorganisms and plants. Environmental Pollution, 242, 1850-1859	NM300K	AgNM	JRC	Suspension	Ag2S	*	*	89.8	Tween	9005-70-3	8% (4% each)	*	15	Below 20	*	*	TEM	*	Spheroidal	*	*	*	*	*	*	*	MilliQ Water and 10.2% of Ag in suspension	*	52.31	Mean	NTA	*	*	*	*	*	Solid	Artificial	RefeSol 01A	Dark	*
224	SR	Article	Soil	Schlich	2015	10.1016/j.envpol.2018.07.082	Long-term effects of three different silver sulfide nanomaterials, silver nitrate and bulk silver sulfide on soil microorganisms and plants	Schlich et al 2015. Long-term effects of three different silver sulfide nanomaterials, silver nitrate and bulk silver sulfide on soil microorganisms and plants. Environmental Pollution, 242, 1850-1859	NM300K	AgNM	JRC	Suspension	Ag2S	*	*	89.8	Tween	9005-70-3	8% (4% each)	*	15	Below 20	*	*	TEM	*	Spheroidal	*	*	*	*	*	*	*	MilliQ Water and 10.2% of Ag in suspension	*	52.31	Mean	NTA	*	*	*	*	*	Solid	Artificial	RefeSol 01A	Dark	*
225	SR	Article	Soil	Schlich	2015	10.1016/j.envpol.2018.07.082	Long-term effects of three different silver sulfide nanomaterials, silver nitrate and bulk silver sulfide on soil microorganisms and plants	Schlich et al 2015. Long-term effects of three different silver sulfide nanomaterials, silver nitrate and bulk silver sulfide on soil microorganisms and plants. Environmental Pollution, 242, 1850-1859	NM300K	AgNM	JRC	Suspension	Ag2S	*	*	89.8	Tween	9005-70-3	8% (4% each)	*	15	Below 20	*	*	TEM	*	Spheroidal	*	*	*	*	*	*	*	MilliQ Water and 10.2% of Ag in suspension	*	52.31	Mean	NTA	*	*	*	*	*	Solid	Artificial	RefeSol 01A	Dark	*
226	SR	Article	Soil	Schlich	2015	10.1016/j.envpol.2018.07.082	Long-term effects of three different silver sulfide nanomaterials, silver nitrate and bulk silver sulfide on soil microorganisms and plants	Schlich et al 2015. Long-term effects of three different silver sulfide nanomaterials, silver nitrate and bulk silver sulfide on soil microorganisms and plants. Environmental Pollution, 242, 1850-1859	NM300K	AgNM	JRC	Suspension	Ag2S	*	*	89.8	Tween	9005-70-3	8% (4% each)	*	15	Below 20	*	*	TEM	*	Spheroidal	*	*	*	*	*	*	*	MilliQ Water and 10.2% of Ag in suspension	*	52.31	Mean	NTA	*	*	*	*	*	Solid	Artificial	RefeSol 01A	Dark	*
233	SR	Article	Soil	Schlich	2015	10.1016/j.envpol.2018.07.082	Long-term effects of three different silver sulfide nanomaterials, silver nitrate and bulk silver sulfide on soil microorganisms and plants	Schlich et al 2015. Long-term effects of three different silver sulfide nanomaterials, silver nitrate and bulk silver sulfide on soil microorganisms and plants. Environmental Pollution, 242, 1850-1859	NM300k	AgNM	JRC	Suspension	Ag2S	*	*	89.8	Tween	9005-70-3	8% (4% each)	*	15	Below 20	*	*	TEM	*	Spheroidal	*	*	*	*	*	*	*	MilliQ Water and 10.2% of Ag in suspension	*	52.31	Mean	NTA	*	*	*	*	*	Solid	Artificial	RefeSol 01A	Dark	*
234	SR	Article	Soil	Schlich	2015	10.1016/j.envpol.2018.07.082	Long-term effects of three different silver sulfide nanomaterials, silver nitrate and bulk silver sulfide on soil microorganisms and plants	Schlich et al 2015. Long-term effects of three different silver sulfide nanomaterials, silver nitrate and bulk silver sulfide on soil microorganisms and plants. Environmental Pollution, 242, 1850-1859	NM300k	AgNM	JRC	Suspension	Ag2S	*	*	89.8	Tween	9005-70-3	8% (4% each)	*	15	Below 20	*	*	TEM	*	Spheroidal	*	*	*	*	*	*	*	MilliQ Water and 10.2% of Ag in suspension	*	52.31	Mean	NTA	*	*	*	*	*	Solid	Artificial	RefeSol 01A	Dark	*
235	SR	Article	Soil	Schlich	2015	10.1016/j.envpol.2018.07.082	Long-term effects of three different silver sulfide nanomaterials, silver nitrate and bulk silver sulfide on soil microorganisms and plants	Schlich et al 2015. Long-term effects of three different silver sulfide nanomaterials, silver nitrate and bulk silver sulfide on soil microorganisms and plants. Environmental Pollution, 242, 1850-1859	NM300k	AgNM	JRC	Suspension	Ag2S	*	*	89.8	Tween	9005-70-3	8% (4% each)	*	15	Below 20	*	*	TEM	*	Spheroidal	*	*	*	*	*	*	*	MilliQ Water and 10.2% of Ag in suspension	*	52.31	Mean	NTA	*	*	*	*	*	Solid	Artificial	RefeSol 01A	Dark	*
236	SR	Article	Soil	Schlich	2015	10.1016/j.envpol.2018.07.082	Long-term effects of three different silver sulfide nanomaterials, silver nitrate and bulk silver sulfide on soil microorganisms and plants	Schlich et al 2015. Long-term effects of three different silver sulfide nanomaterials, silver nitrate and bulk silver sulfide on soil microorganisms and plants. Environmental Pollution, 242, 1850-1859	NM300k	AgNM	JRC	Suspension	Ag2S	*	*	89.8	Tween	9005-70-3	8% (4% each)	*	15	Below 20	*	*	TEM	*	Spheroidal	*	*	*	*	*	*	*	MilliQ Water and 10.2% of Ag in suspension	*	52.31	Mean	NTA	*	*	*	*	*	Solid	Artificial	RefeSol 01A	Dark	*
237	SR	Article	Soil	Schlich	2015	10.1016/j.envpol.2018.07.082	Long-term effects of three different silver sulfide nanomaterials, silver nitrate and bulk silver sulfide on soil microorganisms and plants	Schlich et al 2015. Long-term effects of three different silver sulfide nanomaterials, silver nitrate and bulk silver sulfide on soil microorganisms and plants. Environmental Pollution, 242, 1850-1859	NM300k	AgNM	JRC	Suspension	Ag2S	*	*	89.8	Tween	9005-70-3	8% (4% each)	*	15	Below 20	*	*	TEM	*	Spheroidal	*	*	*	*	*	*	*	MilliQ Water and 10.2% of Ag in suspension	*	52.31	Mean	NTA	*	*	*	*	*	Solid	Artificial	RefeSol 01A	Dark	*
238	SR	Article	Soil	Schlich	2015	10.1016/j.envpol.2018.07.082	Long-term effects of three different silver sulfide nanomaterials, silver nitrate and bulk silver sulfide on soil microorganisms and plants	Schlich et al 2015. Long-term effects of three different silver sulfide nanomaterials, silver nitrate and bulk silver sulfide on soil microorganisms and plants. Environmental Pollution, 242, 1850-1859	NM300k	AgNM	JRC	Suspension	Ag2S	*	*	89.8	Tween	9005-70-3	8% (4% each)	*	15	Below 20	*	*	TEM	*	Spheroidal	*	*	*	*	*	*	*	MilliQ Water and 10.2% of Ag in suspension	*	52.31	Mean	NTA	*	*	*	*	*	Solid	Artificial	RefeSol 01A	Dark	*
239	SR	Article	Soil	Schlich	2015	10.1016/j.envpol.2018.07.082	Long-term effects of three different silver sulfide nanomaterials, silver nitrate and bulk silver sulfide on soil microorganisms and plants	Schlich et al 2015. Long-term effects of three different silver sulfide nanomaterials, silver nitrate and bulk silver sulfide on soil microorganisms and plants. Environmental Pollution, 242, 1850-1859	NM300k	AgNM	JRC	Suspension	Ag2S	*	*	89.8	Tween	9005-70-3	8% (4% each)	*	15	Below 20	*	*	TEM	*	Spheroidal	*	*	*	*	*	*	*	MilliQ Water and 10.2% of Ag in suspension	*	52.31	Mean	NTA	*	*	*	*	*	Solid	Artificial	RefeSol 01A	Dark	*
240	SR	Article	Soil	Schlich	2015	10.1016/j.envpol.2018.07.082	Long-term effects of three different silver sulfide nanomaterials, silver nitrate and bulk silver sulfide on soil microorganisms and plants	Schlich et al 2015. Long-term effects of three different silver sulfide nanomaterials, silver nitrate and bulk silver sulfide on soil microorganisms and plants. Environmental Pollution, 242, 1850-1859	NM300k	AgNM	JRC	Suspension	Ag2S	*	*	89.8	Tween	9005-70-3	8% (4% each)	*	15	Below 20	*	*	TEM	*	Spheroidal	*	*	*	*	*	*	*	MilliQ Water and 10.2% of Ag in suspension	*	52.31	Mean	NTA	*	*	*	*	*	Solid	Artificial	RefeSol 01A	Dark	*
245	SR	Article	Soil	Schlich	2015	10.1016/j.envpol.2018.07.082	Long-term effects of three different silver sulfide nanomaterials, silver nitrate and bulk silver sulfide on soil microorganisms and plants	Schlich et al 2015. Long-term effects of three different silver sulfide nanomaterials, silver nitrate and bulk silver sulfide on soil microorganisms and plants. Environmental Pollution, 242, 1850-1859	NM300K	AgNM	JRC	Suspension	Ag2S	*	*	89.8	Tween	9005-70-3	8% (4% each)	*	15	Below 20	*	*	TEM	*	Spheroidal	*	*	*	*	*	*	*	MilliQ Water and 10.2% of Ag in suspension	*	52.31	Mean	NTA	*	*	*	*	*	Solid	Artificial	RefeSol 01A	Dark	*
246	SR	Article	Soil	Schlich	2015	10.1016/j.envpol.2018.07.082	Long-term effects of three different silver sulfide nanomaterials, silver nitrate and bulk silver sulfide on soil microorganisms and plants	Schlich et al 2015. Long-term effects of three different silver sulfide nanomaterials, silver nitrate and bulk silver sulfide on soil microorganisms and plants. Environmental Pollution, 242, 1850-1859	NM300K	AgNM	JRC	Suspension	Ag2S	*	*	89.8	Tween	9005-70-3	8% (4% each)	*	15	Below 20	*	*	TEM	*	Spheroidal	*	*	*	*	*	*	*	MilliQ Water and 10.2% of Ag in suspension	*	52.31	Mean	NTA	*	*	*	*	*	Solid	Artificial	RefeSol 01A	Dark	*
247	SR	Article	Soil	Schlich	2015	10.1016/j.envpol.2018.07.082	Long-term effects of three different silver sulfide nanomaterials, silver nitrate and bulk silver sulfide on soil microorganisms and plants	Schlich et al 2015. Long-term effects of three different silver sulfide nanomaterials, silver nitrate and bulk silver sulfide on soil microorganisms and plants. Environmental Pollution, 242, 1850-1859	NM300K	AgNM	JRC	Suspension	Ag2S	*	*	89.8	Tween	9005-70-3	8% (4% each)	*	15	Below 20	*	*	TEM	*	Spheroidal	*	*	*	*	*	*	*	MilliQ Water and 10.2% of Ag in suspension	*	52.31	Mean	NTA	*	*	*	*	*	Solid	Artificial	RefeSol 01A	Dark	*
248	SR	Article	Soil	Schlich	2015	10.1016/j.envpol.2018.07.082	Long-term effects of three different silver sulfide nanomaterials, silver nitrate and bulk silver sulfide on soil microorganisms and plants	Schlich et al 2015. Long-term effects of three different silver sulfide nanomaterials, silver nitrate and bulk silver sulfide on soil microorganisms and plants. Environmental Pollution, 242, 1850-1859	NM300K	AgNM	JRC	Suspension	Ag2S	*	*	89.8	Tween	9005-70-3	8% (4% each)	*	15	Below 20	*	*	TEM	*	Spheroidal	*	*	*	*	*	*	*	MilliQ Water and 10.2% of Ag in suspension	*	52.31	Mean	NTA	*	*	*	*	*	Solid	Artificial	RefeSol 01A	Dark	*
249	SR	Article	Soil	Schlich	2015	10.1016/j.envpol.2018.07.082	Long-term effects of three different silver sulfide nanomaterials, silver nitrate and bulk silver sulfide on soil microorganisms and plants	Schlich et al 2015. Long-term effects of three different silver sulfide nanomaterials, silver nitrate and bulk silver sulfide on soil microorganisms and plants. Environmental Pollution, 242, 1850-1859	NM300K	AgNM	JRC	Suspension	Ag2S	*	*	89.8	Tween	9005-70-3	8% (4% each)	*	15	Below 20	*	*	TEM	*	Spheroidal	*	*	*	*	*	*	*	MilliQ Water and 10.2% of Ag in suspension	*	52.31	Mean	NTA	*	*	*	*	*	Solid	Artificial	RefeSol 01A	Dark	*
250	SR	Article	Soil	Schlich	2015	10.1016/j.envpol.2018.07.082	Long-term effects of three different silver sulfide nanomaterials, silver nitrate and bulk silver sulfide on soil microorganisms and plants	Schlich et al 2015. Long-term effects of three different silver sulfide nanomaterials, silver nitrate and bulk silver sulfide on soil microorganisms and plants. Environmental Pollution, 242, 1850-1859	NM300K	AgNM	JRC	Suspension	Ag2S	*	*	89.8	Tween	9005-70-3	8% (4% each)	*	15	Below 20	*	*	TEM	*	Spheroidal	*	*	*	*	*	*	*	MilliQ Water and 10.2% of Ag in suspension	*	52.31	Mean	NTA	*	*	*	*	*	Solid	Artificial	RefeSol 01A	Dark	*
251	SR	Article	Soil	Schlich	2015	10.1016/j.envpol.2018.07.082	Long-term effects of three different silver sulfide nanomaterials, silver nitrate and bulk silver sulfide on soil microorganisms and plants	Schlich et al 2015. Long-term effects of three different silver sulfide nanomaterials, silver nitrate and bulk silver sulfide on soil microorganisms and plants. Environmental Pollution, 242, 1850-1859	NM300K	AgNM	JRC	Suspension	Ag2S	*	*	89.8	Tween	9005-70-3	8% (4% each)	*	15	Below 20	*	*	TEM	*	Spheroidal	*	*	*	*	*	*	*	MilliQ Water and 10.2% of Ag in suspension	*	52.31	Mean	NTA	*	*	*	*	*	Solid	Artificial	RefeSol 01A	Dark	*
252	SR	Article	Soil	Schlich	2015	10.1016/j.envpol.2018.07.082	Long-term effects of three different silver sulfide nanomaterials, silver nitrate and bulk silver sulfide on soil microorganisms and plants	Schlich et al 2015. Long-term effects of three different silver sulfide nanomaterials, silver nitrate and bulk silver sulfide on soil microorganisms and plants. Environmental Pollution, 242, 1850-1859	NM300K	AgNM	JRC	Suspension	Ag2S	*	*	89.8	Tween	9005-70-3	8% (4% each)	*	15	Below 20	*	*	TEM	*	Spheroidal	*	*	*	*	*	*	*	MilliQ Water and 10.2% of Ag in suspension	*	52.31	Mean	NTA	*	*	*	*	*	Solid	Artificial	RefeSol 01A	Dark	*
253	SR	Article	Soil	Schlich	2015	10.1016/j.envpol.2018.07.082	Long-term effects of three different silver sulfide nanomaterials, silver nitrate and bulk silver sulfide on soil microorganisms and plants	Schlich et al 2015. Long-term effects of three different silver sulfide nanomaterials, silver nitrate and bulk silver sulfide on soil microorganisms and plants. Environmental Pollution, 242, 1850-1859	NM300K	AgNM	JRC	Suspension	Ag2S	*	*	89.8	Tween	9005-70-3	8% (4% each)	*	15	Below 20	*	*	TEM	*	Spheroidal	*	*	*	*	*	*	*	MilliQ Water and 10.2% of Ag in suspension	*	52.31	Mean	NTA	*	*	*	*	*	Solid	Artificial	RefeSol 01A	Dark	*
254	SR	Article	Soil	Schlich	2015	10.1016/j.envpol.2018.07.082	Long-term effects of three different silver sulfide nanomaterials, silver nitrate and bulk silver sulfide on soil microorganisms and plants	Schlich et al 2015. Long-term effects of three different silver sulfide nanomaterials, silver nitrate and bulk silver sulfide on soil microorganisms and plants. Environmental Pollution, 242, 1850-1859	NM300K	AgNM	JRC	Suspension	Ag2S	*	*	89.8	Tween	9005-70-3	8% (4% each)	*	15	Below 20	*	*	TEM	*	Spheroidal	*	*	*	*	*	*	*	MilliQ Water and 10.2% of Ag in suspension	*	52.31	Mean	NTA	*	*	*	*	*	Solid	Artificial	RefeSol 01A	Dark	*
255	SR	Article	Soil	Schlich	2015	10.1016/j.envpol.2018.07.082	Long-term effects of three different silver sulfide nanomaterials, silver nitrate and bulk silver sulfide on soil microorganisms and plants	Schlich et al 2015. Long-term effects of three different silver sulfide nanomaterials, silver nitrate and bulk silver sulfide on soil microorganisms and plants. Environmental Pollution, 242, 1850-1859	NM300K	AgNM	JRC	Suspension	Ag2S	*	*	89.8	Tween	9005-70-3	8% (4% each)	*	15	Below 20	*	*	TEM	*	Spheroidal	*	*	*	*	*	*	*	MilliQ Water and 10.2% of Ag in suspension	*	52.31	Mean	NTA	*	*	*	*	*	Solid	Artificial	RefeSol 01A	Dark	*
256	SR	Article	Soil	Schlich	2015	10.1016/j.envpol.2018.07.082	Long-term effects of three different silver sulfide nanomaterials, silver nitrate and bulk silver sulfide on soil microorganisms and plants	Schlich et al 2015. Long-term effects of three different silver sulfide nanomaterials, silver nitrate and bulk silver sulfide on soil microorganisms and plants. Environmental Pollution, 242, 1850-1859	NM300K	AgNM	JRC	Suspension	Ag2S	*	*	89.8	Tween	9005-70-3	8% (4% each)	*	15	Below 20	*	*	TEM	*	Spheroidal	*	*	*	*	*	*	*	MilliQ Water and 10.2% of Ag in suspension	*	52.31	Mean	NTA	*	*	*	*	*	Solid	Artificial	RefeSol 01A	Dark	*
257	SR	Article	Soil	Schlich	2015	10.1016/j.envpol.2018.07.082	Long-term effects of three different silver sulfide nanomaterials, silver nitrate and bulk silver sulfide on soil microorganisms and plants	Schlich et al 2015. Long-term effects of three different silver sulfide nanomaterials, silver nitrate and bulk silver sulfide on soil microorganisms and plants. Environmental Pollution, 242, 1850-1859	NM300K	AgNM	JRC	Suspension	Ag2S	*	*	89.8	Tween	9005-70-3	8% (4% each)	*	15	Below 20	*	*	TEM	*	Spheroidal	*	*	*	*	*	*	*	MilliQ Water and 10.2% of Ag in suspension	*	52.31	Mean	NTA	*	*	*	*	*	Solid	Artificial	RefeSol 01A	Dark	*
258	SR	Article	Soil	Schlich	2015	10.1016/j.envpol.2018.07.082	Long-term effects of three different silver sulfide nanomaterials, silver nitrate and bulk silver sulfide on soil microorganisms and plants	Schlich et al 2015. Long-term effects of three different silver sulfide nanomaterials, silver nitrate and bulk silver sulfide on soil microorganisms and plants. Environmental Pollution, 242, 1850-1859	NM300K	AgNM	JRC	Suspension	Ag2S	*	*	89.8	Tween	9005-70-3	8% (4% each)	*	15	Below 20	*	*	TEM	*	Spheroidal	*	*	*	*	*	*	*	MilliQ Water and 10.2% of Ag in suspension	*	52.31	Mean	NTA	*	*	*	*	*	Solid	Artificial	RefeSol 01A	Dark	*
260	SR	Article	Soil	Schlich	2015	10.1016/j.envpol.2018.07.082	Long-term effects of three different silver sulfide nanomaterials, silver nitrate and bulk silver sulfide on soil microorganisms and plants	Schlich et al 2015. Long-term effects of three different silver sulfide nanomaterials, silver nitrate and bulk silver sulfide on soil microorganisms and plants. Environmental Pollution, 242, 1850-1859	NM300K	AgNM	JRC	Suspension	Ag2S	*	*	89.8	Tween	9005-70-3	8% (4% each)	*	15	Below 20	*	*	TEM	*	Spheroidal	*	*	*	*	*	*	*	MilliQ Water and 10.2% of Ag in suspension	*	52.31	Mean	NTA	*	*	*	*	*	Solid	Artificial	RefeSol 01A	Dark	*
263	SR	Article	Soil	Schlich	2015	10.1016/j.envpol.2018.07.082	Long-term effects of three different silver sulfide nanomaterials, silver nitrate and bulk silver sulfide on soil microorganisms and plants	Schlich et al 2015. Long-term effects of three different silver sulfide nanomaterials, silver nitrate and bulk silver sulfide on soil microorganisms and plants. Environmental Pollution, 242, 1850-1859	Ag2S		Sigma-Aldrich	Powder	Ag2S	21548-73-2	*	*	*	*	*	*	Unreported	Unreported	*	*	*	*	*	*	*	*	*	*	*	*	*	*	*	*	*	*	*	*	*	*	Solid	Artificial	RefeSol 01A	Dark	*
264	SR	Article	Soil	Schlich	2015	10.1016/j.envpol.2018.07.082	Long-term effects of three different silver sulfide nanomaterials, silver nitrate and bulk silver sulfide on soil microorganisms and plants	Schlich et al 2015. Long-term effects of three different silver sulfide nanomaterials, silver nitrate and bulk silver sulfide on soil microorganisms and plants. Environmental Pollution, 242, 1850-1859	Ag2S		Sigma-Aldrich	Powder	Ag2S	21548-73-2	*	*	*	*	*	*	Unreported	Unreported	*	*	*	*	*	*	*	*	*	*	*	*	*	*	*	*	*	*	*	*	*	*	Solid	Artificial	RefeSol 01A	Dark	*
265	SR	Article	Soil	Schlich	2015	10.1016/j.envpol.2018.07.082	Long-term effects of three different silver sulfide nanomaterials, silver nitrate and bulk silver sulfide on soil microorganisms and plants	Schlich et al 2015. Long-term effects of three different silver sulfide nanomaterials, silver nitrate and bulk silver sulfide on soil microorganisms and plants. Environmental Pollution, 242, 1850-1859	Ag2S		Sigma-Aldrich	Powder	Ag2S	21548-73-2	*	*	*	*	*	*	Unreported	Unreported	*	*	*	*	*	*	*	*	*	*	*	*	*	*	*	*	*	*	*	*	*	*	Solid	Artificial	RefeSol 01A	Dark	*
266	SR	Article	Soil	Schlich	2015	10.1016/j.envpol.2018.07.082	Long-term effects of three different silver sulfide nanomaterials, silver nitrate and bulk silver sulfide on soil microorganisms and plants	Schlich et al 2015. Long-term effects of three different silver sulfide nanomaterials, silver nitrate and bulk silver sulfide on soil microorganisms and plants. Environmental Pollution, 242, 1850-1859	Ag2S		Sigma-Aldrich	Powder	Ag2S	21548-73-2	*	*	*	*	*	*	Unreported	Unreported	*	*	*	*	*	*	*	*	*	*	*	*	*	*	*	*	*	*	*	*	*	*	Solid	Artificial	RefeSol 01A	Dark	*
267	SR	Article	Soil	Schlich	2015	10.1016/j.envpol.2018.07.082	Long-term effects of three different silver sulfide nanomaterials, silver nitrate and bulk silver sulfide on soil microorganisms and plants	Schlich et al 2015. Long-term effects of three different silver sulfide nanomaterials, silver nitrate and bulk silver sulfide on soil microorganisms and plants. Environmental Pollution, 242, 1850-1859	Ag2S		Sigma-Aldrich	Powder	Ag2S	21548-73-2	*	*	*	*	*	*	Unreported	Unreported	*	*	*	*	*	*	*	*	*	*	*	*	*	*	*	*	*	*	*	*	*	*	Solid	Artificial	RefeSol 01A	Dark	*
268	SR	Article	Soil	Schlich	2015	10.1016/j.envpol.2018.07.082	Long-term effects of three different silver sulfide nanomaterials, silver nitrate and bulk silver sulfide on soil microorganisms and plants	Schlich et al 2015. Long-term effects of three different silver sulfide nanomaterials, silver nitrate and bulk silver sulfide on soil microorganisms and plants. Environmental Pollution, 242, 1850-1859	Ag2S		Sigma-Aldrich	Powder	Ag2S	21548-73-2	*	*	*	*	*	*	Unreported	Unreported	*	*	*	*	*	*	*	*	*	*	*	*	*	*	*	*	*	*	*	*	*	*	Solid	Artificial	RefeSol 01A	Dark	*
269	SR	Article	Soil	Schlich	2015	10.1016/j.envpol.2018.07.082	Long-term effects of three different silver sulfide nanomaterials, silver nitrate and bulk silver sulfide on soil microorganisms and plants	Schlich et al 2015. Long-term effects of three different silver sulfide nanomaterials, silver nitrate and bulk silver sulfide on soil microorganisms and plants. Environmental Pollution, 242, 1850-1859	Ag2S		Sigma-Aldrich	Powder	Ag2S	21548-73-2	*	*	*	*	*	*	Unreported	Unreported	*	*	*	*	*	*	*	*	*	*	*	*	*	*	*	*	*	*	*	*	*	*	Solid	Artificial	RefeSol 01A	Dark	*
270	SR	Article	Soil	Schlich	2015	10.1016/j.envpol.2018.07.082	Long-term effects of three different silver sulfide nanomaterials, silver nitrate and bulk silver sulfide on soil microorganisms and plants	Schlich et al 2015. Long-term effects of three different silver sulfide nanomaterials, silver nitrate and bulk silver sulfide on soil microorganisms and plants. Environmental Pollution, 242, 1850-1859	Ag2S		Sigma-Aldrich	Powder	Ag2S	21548-73-2	*	*	*	*	*	*	Unreported	Unreported	*	*	*	*	*	*	*	*	*	*	*	*	*	*	*	*	*	*	*	*	*	*	Solid	Artificial	RefeSol 01A	Dark	*
271	SR	Article	Soil	Schlich	2015	10.1016/j.envpol.2018.07.082	Long-term effects of three different silver sulfide nanomaterials, silver nitrate and bulk silver sulfide on soil microorganisms and plants	Schlich et al 2015. Long-term effects of three different silver sulfide nanomaterials, silver nitrate and bulk silver sulfide on soil microorganisms and plants. Environmental Pollution, 242, 1850-1859	Ag2S		Sigma-Aldrich	Powder	Ag2S	21548-73-2	*	*	*	*	*	*	Unreported	Unreported	*	*	*	*	*	*	*	*	*	*	*	*	*	*	*	*	*	*	*	*	*	*	Solid	Artificial	RefeSol 01A	Dark	*
272	SR	Article	Soil	Schlich	2015	10.1016/j.envpol.2018.07.082	Long-term effects of three different silver sulfide nanomaterials, silver nitrate and bulk silver sulfide on soil microorganisms and plants	Schlich et al 2015. Long-term effects of three different silver sulfide nanomaterials, silver nitrate and bulk silver sulfide on soil microorganisms and plants. Environmental Pollution, 242, 1850-1859	Ag2S		Sigma-Aldrich	Powder	Ag2S	21548-73-2	*	*	*	*	*	*	Unreported	Unreported	*	*	*	*	*	*	*	*	*	*	*	*	*	*	*	*	*	*	*	*	*	*	Solid	Artificial	RefeSol 01A	Dark	*
273	SR	Article	Soil	Schlich	2015	10.1016/j.envpol.2018.07.082	Long-term effects of three different silver sulfide nanomaterials, silver nitrate and bulk silver sulfide on soil microorganisms and plants	Schlich et al 2015. Long-term effects of three different silver sulfide nanomaterials, silver nitrate and bulk silver sulfide on soil microorganisms and plants. Environmental Pollution, 242, 1850-1859	Ag2S		Sigma-Aldrich	Powder	Ag2S	21548-73-2	*	*	*	*	*	*	Unreported	Unreported	*	*	*	*	*	*	*	*	*	*	*	*	*	*	*	*	*	*	*	*	*	*	Solid	Artificial	RefeSol 01A	Dark	*
274	SR	Article	Soil	Schlich	2015	10.1016/j.envpol.2018.07.082	Long-term effects of three different silver sulfide nanomaterials, silver nitrate and bulk silver sulfide on soil microorganisms and plants	Schlich et al 2015. Long-term effects of three different silver sulfide nanomaterials, silver nitrate and bulk silver sulfide on soil microorganisms and plants. Environmental Pollution, 242, 1850-1859	Ag2S		Sigma-Aldrich	Powder	Ag2S	21548-73-2	*	*	*	*	*	*	Unreported	Unreported	*	*	*	*	*	*	*	*	*	*	*	*	*	*	*	*	*	*	*	*	*	*	Solid	Artificial	RefeSol 01A	Dark	*
275	SR	Article	Soil	Schlich	2015	10.1016/j.envpol.2018.07.082	Long-term effects of three different silver sulfide nanomaterials, silver nitrate and bulk silver sulfide on soil microorganisms and plants	Schlich et al 2015. Long-term effects of three different silver sulfide nanomaterials, silver nitrate and bulk silver sulfide on soil microorganisms and plants. Environmental Pollution, 242, 1850-1859	Ag2S		Sigma-Aldrich	Powder	Ag2S	21548-73-2	*	*	*	*	*	*	Unreported	Unreported	*	*	*	*	*	*	*	*	*	*	*	*	*	*	*	*	*	*	*	*	*	*	Solid	Artificial	RefeSol 01A	Dark	*
276	SR	Article	Soil	Schlich	2015	10.1016/j.envpol.2018.07.082	Long-term effects of three different silver sulfide nanomaterials, silver nitrate and bulk silver sulfide on soil microorganisms and plants	Schlich et al 2015. Long-term effects of three different silver sulfide nanomaterials, silver nitrate and bulk silver sulfide on soil microorganisms and plants. Environmental Pollution, 242, 1850-1859	Ag2S		Sigma-Aldrich	Powder	Ag2S	21548-73-2	*	*	*	*	*	*	Unreported	Unreported	*	*	*	*	*	*	*	*	*	*	*	*	*	*	*	*	*	*	*	*	*	*	Solid	Artificial	RefeSol 01A	Dark	*
277	SR	Article	Soil	Schlich	2015	10.1016/j.envpol.2018.07.082	Long-term effects of three different silver sulfide nanomaterials, silver nitrate and bulk silver sulfide on soil microorganisms and plants	Schlich et al 2015. Long-term effects of three different silver sulfide nanomaterials, silver nitrate and bulk silver sulfide on soil microorganisms and plants. Environmental Pollution, 242, 1850-1859	Ag2S		Sigma-Aldrich	Powder	Ag2S	21548-73-2	*	*	*	*	*	*	Unreported	Unreported	*	*	*	*	*	*	*	*	*	*	*	*	*	*	*	*	*	*	*	*	*	*	Solid	Artificial	RefeSol 01A	Dark	*
278	SR	Article	Soil	Schlich	2015	10.1016/j.envpol.2018.07.082	Long-term effects of three different silver sulfide nanomaterials, silver nitrate and bulk silver sulfide on soil microorganisms and plants	Schlich et al 2015. Long-term effects of three different silver sulfide nanomaterials, silver nitrate and bulk silver sulfide on soil microorganisms and plants. Environmental Pollution, 242, 1850-1859	Ag2S		Sigma-Aldrich	Powder	Ag2S	21548-73-2	*	*	*	*	*	*	Unreported	Unreported	*	*	*	*	*	*	*	*	*	*	*	*	*	*	*	*	*	*	*	*	*	*	Solid	Artificial	RefeSol 01A	Dark	*
279	SR	Article	Soil	Schlich	2015	10.1016/j.envpol.2018.07.082	Long-term effects of three different silver sulfide nanomaterials, silver nitrate and bulk silver sulfide on soil microorganisms and plants	Schlich et al 2015. Long-term effects of three different silver sulfide nanomaterials, silver nitrate and bulk silver sulfide on soil microorganisms and plants. Environmental Pollution, 242, 1850-1859	Ag2S		Sigma-Aldrich	Powder	Ag2S	21548-73-2	*	*	*	*	*	*	Unreported	Unreported	*	*	*	*	*	*	*	*	*	*	*	*	*	*	*	*	*	*	*	*	*	*	Solid	Artificial	RefeSol 01A	Dark	*
280	SR	Article	Soil	Schlich	2015	10.1016/j.envpol.2018.07.082	Long-term effects of three different silver sulfide nanomaterials, silver nitrate and bulk silver sulfide on soil microorganisms and plants	Schlich et al 2015. Long-term effects of three different silver sulfide nanomaterials, silver nitrate and bulk silver sulfide on soil microorganisms and plants. Environmental Pollution, 242, 1850-1859	Ag2S		Sigma-Aldrich	Powder	Ag2S	21548-73-2	*	*	*	*	*	*	Unreported	Unreported	*	*	*	*	*	*	*	*	*	*	*	*	*	*	*	*	*	*	*	*	*	*	Solid	Artificial	RefeSol 01A	Dark	*
281	SR	Article	Soil	Schlich	2015	10.1016/j.envpol.2018.07.082	Long-term effects of three different silver sulfide nanomaterials, silver nitrate and bulk silver sulfide on soil microorganisms and plants	Schlich et al 2015. Long-term effects of three different silver sulfide nanomaterials, silver nitrate and bulk silver sulfide on soil microorganisms and plants. Environmental Pollution, 242, 1850-1859	AgNO3		Sigma-Aldrich	Suspension	Ag2S	7761-88-8	*	*	*	*	*	*	Unreported	Unreported	*	*	*	*	*	*	*	*	*	*	*	*	*	*	*	*	*	*	*	*	*	*	Solid	Artificial	RefeSol 01A	Dark	*
282	SR	Article	Soil	Schlich	2015	10.1016/j.envpol.2018.07.082	Long-term effects of three different silver sulfide nanomaterials, silver nitrate and bulk silver sulfide on soil microorganisms and plants	Schlich et al 2015. Long-term effects of three different silver sulfide nanomaterials, silver nitrate and bulk silver sulfide on soil microorganisms and plants. Environmental Pollution, 242, 1850-1859	AgNO3		Sigma-Aldrich	Suspension	Ag2S	7761-88-8	*	*	*	*	*	*	Unreported	Unreported	*	*	*	*	*	*	*	*	*	*	*	*	*	*	*	*	*	*	*	*	*	*	Solid	Artificial	RefeSol 01A	Dark	*
283	SR	Article	Soil	Schlich	2015	10.1016/j.envpol.2018.07.082	Long-term effects of three different silver sulfide nanomaterials, silver nitrate and bulk silver sulfide on soil microorganisms and plants	Schlich et al 2015. Long-term effects of three different silver sulfide nanomaterials, silver nitrate and bulk silver sulfide on soil microorganisms and plants. Environmental Pollution, 242, 1850-1859	AgNO3		Sigma-Aldrich	Suspension	Ag2S	7761-88-8	*	*	*	*	*	*	Unreported	Unreported	*	*	*	*	*	*	*	*	*	*	*	*	*	*	*	*	*	*	*	*	*	*	Solid	Artificial	RefeSol 01A	Dark	*
284	SR	Article	Soil	Schlich	2015	10.1016/j.envpol.2018.07.082	Long-term effects of three different silver sulfide nanomaterials, silver nitrate and bulk silver sulfide on soil microorganisms and plants	Schlich et al 2015. Long-term effects of three different silver sulfide nanomaterials, silver nitrate and bulk silver sulfide on soil microorganisms and plants. Environmental Pollution, 242, 1850-1859	AgNO3		Sigma-Aldrich	Suspension	Ag2S	7761-88-8	*	*	*	*	*	*	Unreported	Unreported	*	*	*	*	*	*	*	*	*	*	*	*	*	*	*	*	*	*	*	*	*	*	Solid	Artificial	RefeSol 01A	Dark	*
285	SR	Article	Soil	Schlich	2015	10.1016/j.envpol.2018.07.082	Long-term effects of three different silver sulfide nanomaterials, silver nitrate and bulk silver sulfide on soil microorganisms and plants	Schlich et al 2015. Long-term effects of three different silver sulfide nanomaterials, silver nitrate and bulk silver sulfide on soil microorganisms and plants. Environmental Pollution, 242, 1850-1859	AgNO3		Sigma-Aldrich	Suspension	Ag2S	7761-88-8	*	*	*	*	*	*	Unreported	Unreported	*	*	*	*	*	*	*	*	*	*	*	*	*	*	*	*	*	*	*	*	*	*	Solid	Artificial	RefeSol 01A	Dark	*
286	SR	Article	Soil	Schlich	2015	10.1016/j.envpol.2018.07.082	Long-term effects of three different silver sulfide nanomaterials, silver nitrate and bulk silver sulfide on soil microorganisms and plants	Schlich et al 2015. Long-term effects of three different silver sulfide nanomaterials, silver nitrate and bulk silver sulfide on soil microorganisms and plants. Environmental Pollution, 242, 1850-1859	AgNO3		Sigma-Aldrich	Suspension	Ag2S	7761-88-8	*	*	*	*	*	*	Unreported	Unreported	*	*	*	*	*	*	*	*	*	*	*	*	*	*	*	*	*	*	*	*	*	*	Solid	Artificial	RefeSol 01A	Dark	*
293	SR	Article	Soil	Mariyadas	2018	10.1002/etc.3944	Earthworm avoidance of silver nanomaterials over time	Mariyadas et al 2018. Earthworm avoidance of silver nanomaterials over time. Environmental Pollution, 239, 751-756	AgNO3		Sigma-Aldrich	Powder	Ag	7761-88-8	*	0.2	*	*	*	*	Unreported	Unreported	*	*	*	*	*	*	*	*	*	*	*	*	*	*	*	*	*	*	*	*	*	*	Solid	Artificial	OECD soil	Light	16
294	SR	Article	Soil	Mariyadas	2018	10.1002/etc.3944	Earthworm avoidance of silver nanomaterials over time	Mariyadas et al 2018. Earthworm avoidance of silver nanomaterials over time. Environmental Pollution, 239, 751-756	AgNO3		Sigma-Aldrich	Powder	Ag	7761-88-8	*	0.2	*	*	*	*	Unreported	Unreported	*	*	*	*	*	*	*	*	*	*	*	*	*	*	*	*	*	*	*	*	*	*	Solid	Artificial	OECD soil	Light	16
295	SR	Article	Soil	Mariyadas	2018	10.1002/etc.3944	Earthworm avoidance of silver nanomaterials over time	Mariyadas et al 2018. Earthworm avoidance of silver nanomaterials over time. Environmental Pollution, 239, 751-756	AgNO3		Sigma-Aldrich	Powder	Ag	7761-88-8	*	0.2	*	*	*	*	Unreported	Unreported	*	*	*	*	*	*	*	*	*	*	*	*	*	*	*	*	*	*	*	*	*	*	Solid	Artificial	OECD soil	Light	16
296	SR	Article	Soil	Mariyadas	2018	10.1002/etc.3944	Earthworm avoidance of silver nanomaterials over time	Mariyadas et al 2018. Earthworm avoidance of silver nanomaterials over time. Environmental Pollution, 239, 751-756	AgNO3		Sigma-Aldrich	Powder	Ag	7761-88-8	*	0.2	*	*	*	*	Unreported	Unreported	*	*	*	*	*	*	*	*	*	*	*	*	*	*	*	*	*	*	*	*	*	*	Solid	Artificial	OECD soil	Light	16
297	SR	Article	Soil	Mariyadas	2018	10.1002/etc.3944	Earthworm avoidance of silver nanomaterials over time	Mariyadas et al 2018. Earthworm avoidance of silver nanomaterials over time. Environmental Pollution, 239, 751-756	AgNO3		Sigma-Aldrich	Powder	Ag	7761-88-8	*	0.2	*	*	*	*	Unreported	Unreported	*	*	*	*	*	*	*	*	*	*	*	*	*	*	*	*	*	*	*	*	*	*	Solid	Artificial	OECD soil	Light	16
298	SR	Article	Soil	Mariyadas	2018	10.1002/etc.3944	Earthworm avoidance of silver nanomaterials over time	Mariyadas et al 2018. Earthworm avoidance of silver nanomaterials over time. Environmental Pollution, 239, 751-756	AgNO3		Sigma-Aldrich	Powder	Ag	7761-88-8	*	0.2	*	*	*	*	Unreported	Unreported	*	*	*	*	*	*	*	*	*	*	*	*	*	*	*	*	*	*	*	*	*	*	Solid	Artificial	OECD soil	Light	16
299	SR	Article	Soil	Mariyadas	2018	10.1002/etc.3944	Earthworm avoidance of silver nanomaterials over time	Mariyadas et al 2018. Earthworm avoidance of silver nanomaterials over time. Environmental Pollution, 239, 751-756	AgNO3		Sigma-Aldrich	Powder	Ag	7761-88-8	*	0.2	*	*	*	*	Unreported	Unreported	*	*	*	*	*	*	*	*	*	*	*	*	*	*	*	*	*	*	*	*	*	*	Solid	Artificial	OECD soil	Light	16
300	SR	Article	Soil	Mariyadas	2018	10.1002/etc.3944	Earthworm avoidance of silver nanomaterials over time	Mariyadas et al 2018. Earthworm avoidance of silver nanomaterials over time. Environmental Pollution, 239, 751-756	AgNO3		Sigma-Aldrich	Powder	Ag	7761-88-8	*	0.2	*	*	*	*	Unreported	Unreported	*	*	*	*	*	*	*	*	*	*	*	*	*	*	*	*	*	*	*	*	*	*	Solid	Artificial	OECD soil	Light	16
301	SR	Article	Soil	Mariyadas	2018	10.1002/etc.3944	Earthworm avoidance of silver nanomaterials over time	Mariyadas et al 2018. Earthworm avoidance of silver nanomaterials over time. Environmental Pollution, 239, 751-756	NM300K	AgNM	JRC	Suspension	Ag	*	*	89.8	Tween	9005-70-3	8% (4% each)	*	15	Below 20	*	20	TEM	*	Spheroidal	*	*	*	17	TEM	*	*	MilliQ Water and 10.2% of Ag in suspension	*	52.31	Mean	NTA	*	*	*	*	*	Solid	Artificial	OECD soil	Light	16
302	SR	Article	Soil	Mariyadas	2018	10.1002/etc.3944	Earthworm avoidance of silver nanomaterials over time	Mariyadas et al 2018. Earthworm avoidance of silver nanomaterials over time. Environmental Pollution, 239, 751-756	NM300K	AgNM	JRC	Suspension	Ag	*	*	89.8	Tween	9005-70-3	8% (4% each)	*	15	Below 20	*	20	TEM	*	Spheroidal	*	*	*	17	TEM	*	*	MilliQ Water and 10.2% of Ag in suspension	*	52.31	Mean	NTA	*	*	*	*	*	Solid	Artificial	OECD soil	Light	16
303	SR	Article	Soil	Mariyadas	2018	10.1002/etc.3944	Earthworm avoidance of silver nanomaterials over time	Mariyadas et al 2018. Earthworm avoidance of silver nanomaterials over time. Environmental Pollution, 239, 751-756	NM300K	AgNM	JRC	Suspension	Ag	*	*	89.8	Tween	9005-70-3	8% (4% each)	*	15	Below 20	*	20	TEM	*	Spheroidal	*	*	*	17	TEM	*	*	MilliQ Water and 10.2% of Ag in suspension	*	52.31	Mean	NTA	*	*	*	*	*	Solid	Artificial	OECD soil	Light	16
304	SR	Article	Soil	Mariyadas	2018	10.1002/etc.3944	Earthworm avoidance of silver nanomaterials over time	Mariyadas et al 2018. Earthworm avoidance of silver nanomaterials over time. Environmental Pollution, 239, 751-756	NM300K	AgNM	JRC	Suspension	Ag	*	*	89.8	Tween	9005-70-3	8% (4% each)	*	15	Below 20	*	20	TEM	*	Spheroidal	*	*	*	17	TEM	*	*	MilliQ Water and 10.2% of Ag in suspension	*	52.31	Mean	NTA	*	*	*	*	*	Solid	Artificial	OECD soil	Light	16
305	SR	Article	Soil	Mariyadas	2018	10.1002/etc.3944	Earthworm avoidance of silver nanomaterials over time	Mariyadas et al 2018. Earthworm avoidance of silver nanomaterials over time. Environmental Pollution, 239, 751-756	NM300K	AgNM	JRC	Suspension	Ag	*	*	89.8	Tween	9005-70-3	8% (4% each)	*	15	Below 20	*	20	TEM	*	Spheroidal	*	*	*	17	TEM	*	*	MilliQ Water and 10.2% of Ag in suspension	*	52.31	Mean	NTA	*	*	*	*	*	Solid	Artificial	OECD soil	Light	16
306	SR	Article	Soil	Mariyadas	2018	10.1002/etc.3944	Earthworm avoidance of silver nanomaterials over time	Mariyadas et al 2018. Earthworm avoidance of silver nanomaterials over time. Environmental Pollution, 239, 751-756	NM300K	AgNM	JRC	Suspension	Ag	*	*	89.8	Tween	9005-70-3	8% (4% each)	*	15	Below 20	*	20	TEM	*	Spheroidal	*	*	*	17	TEM	*	*	MilliQ Water and 10.2% of Ag in suspension	*	52.31	Mean	NTA	*	*	*	*	*	Solid	Artificial	OECD soil	Light	16
307	SR	Article	Soil	Mariyadas	2018	10.1002/etc.3944	Earthworm avoidance of silver nanomaterials over time	Mariyadas et al 2018. Earthworm avoidance of silver nanomaterials over time. Environmental Pollution, 239, 751-756	NM300K	AgNM	JRC	Suspension	Ag	*	*	89.8	Tween	9005-70-3	8% (4% each)	*	15	Below 20	*	20	TEM	*	Spheroidal	*	*	*	17	TEM	*	*	MilliQ Water and 10.2% of Ag in suspension	*	52.31	Mean	NTA	*	*	*	*	*	Solid	Artificial	OECD soil	Light	16
308	SR	Article	Soil	Mariyadas	2018	10.1002/etc.3944	Earthworm avoidance of silver nanomaterials over time	Mariyadas et al 2018. Earthworm avoidance of silver nanomaterials over time. Environmental Pollution, 239, 751-756	NM300K	AgNM	JRC	Suspension	Ag	*	*	89.8	Tween	9005-70-3	8% (4% each)	*	15	Below 20	*	20	TEM	*	Spheroidal	*	*	*	17	TEM	*	*	MilliQ Water and 10.2% of Ag in suspension	*	52.31	Mean	NTA	*	*	*	*	*	Solid	Artificial	OECD soil	Light	16
309	SR	Article	Soil	Mariyadas	2018	10.1002/etc.3944	Earthworm avoidance of silver nanomaterials over time	Mariyadas et al 2018. Earthworm avoidance of silver nanomaterials over time. Environmental Pollution, 239, 751-756	AgNM	AgNM	AG-M-03M-NPCP.020N (American Elements)	Powder	Ag	*	99	1	Uncoated	*	*	*	25	20-50	20	30	TEM	*	Spheroidal	*	*	*	24	TEM	*	*	*	*	*	*	*	*	*	*	*	*	Solid	Artificial	OECD soil	Light	16
310	SR	Article	Soil	Mariyadas	2018	10.1002/etc.3944	Earthworm avoidance of silver nanomaterials over time	Mariyadas et al 2018. Earthworm avoidance of silver nanomaterials over time. Environmental Pollution, 239, 751-756	AgNM	AgNM	AG-M-03M-NPCP.020N (American Elements)	Powder	Ag	*	99	1	Uncoated	*	*	*	25	20-50	20	30	TEM	*	Spheroidal	*	*	*	24	TEM	*	*	*	*	*	*	*	*	*	*	*	*	Solid	Artificial	OECD soil	Light	16
311	SR	Article	Soil	Mariyadas	2018	10.1002/etc.3944	Earthworm avoidance of silver nanomaterials over time	Mariyadas et al 2018. Earthworm avoidance of silver nanomaterials over time. Environmental Pollution, 239, 751-756	AgNM	AgNM	AG-M-03M-NPCP.020N (American Elements)	Powder	Ag	*	99	1	Uncoated	*	*	*	25	20-50	20	30	TEM	*	Spheroidal	*	*	*	24	TEM	*	*	*	*	*	*	*	*	*	*	*	*	Solid	Artificial	OECD soil	Light	16
312	SR	Article	Soil	Mariyadas	2018	10.1002/etc.3944	Earthworm avoidance of silver nanomaterials over time	Mariyadas et al 2018. Earthworm avoidance of silver nanomaterials over time. Environmental Pollution, 239, 751-756	AgNM	AgNM	AG-M-03M-NPCP.020N (American Elements)	Powder	Ag	*	99	1	Uncoated	*	*	*	25	20-50	20	30	TEM	*	Spheroidal	*	*	*	24	TEM	*	*	*	*	*	*	*	*	*	*	*	*	Solid	Artificial	OECD soil	Light	16
313	SR	Article	Soil	Mariyadas	2018	10.1002/etc.3944	Earthworm avoidance of silver nanomaterials over time	Mariyadas et al 2018. Earthworm avoidance of silver nanomaterials over time. Environmental Pollution, 239, 751-756	AgNM	AgNM	AG-M-03M-NPCP.020N (American Elements)	Powder	Ag	*	99	1	Uncoated	*	*	*	25	20-50	20	30	TEM	*	Spheroidal	*	*	*	24	TEM	*	*	*	*	*	*	*	*	*	*	*	*	Solid	Artificial	OECD soil	Light	16
314	SR	Article	Soil	Mariyadas	2018	10.1002/etc.3944	Earthworm avoidance of silver nanomaterials over time	Mariyadas et al 2018. Earthworm avoidance of silver nanomaterials over time. Environmental Pollution, 239, 751-756	AgNM	AgNM	AG-M-03M-NPCP.020N (American Elements)	Powder	Ag	*	99	1	Uncoated	*	*	*	25	20-50	20	30	TEM	*	Spheroidal	*	*	*	24	TEM	*	*	*	*	*	*	*	*	*	*	*	*	Solid	Artificial	OECD soil	Light	16
315	SR	Article	Soil	Mariyadas	2018	10.1002/etc.3944	Earthworm avoidance of silver nanomaterials over time	Mariyadas et al 2018. Earthworm avoidance of silver nanomaterials over time. Environmental Pollution, 239, 751-756	AgNM	AgNM	AG-M-03M-NPCP.020N (American Elements)	Powder	Ag	*	99	1	Uncoated	*	*	*	25	20-50	20	30	TEM	*	Spheroidal	*	*	*	24	TEM	*	*	*	*	*	*	*	*	*	*	*	*	Solid	Artificial	OECD soil	Light	16
316	SR	Article	Soil	Mariyadas	2018	10.1002/etc.3944	Earthworm avoidance of silver nanomaterials over time	Mariyadas et al 2018. Earthworm avoidance of silver nanomaterials over time. Environmental Pollution, 239, 751-756	AgNM	AgNM	AG-M-03M-NPCP.020N (American Elements)	Powder	Ag	*	99	1	Uncoated	*	*	*	25	20-50	20	30	TEM	*	Spheroidal	*	*	*	24	TEM	*	*	*	*	*	*	*	*	*	*	*	*	Solid	Artificial	OECD soil	Light	16
317	SR	Article	Soil	Mariyadas	2018	10.1002/etc.3944	Earthworm avoidance of silver nanomaterials over time	Mariyadas et al 2018. Earthworm avoidance of silver nanomaterials over time. Environmental Pollution, 239, 751-756	AgNM	AgNM	AG-M-03M-NPCP.020N (American Elements)	Powder	Ag	*	99	1	PVP	9003-39-8	0.2	*	25	20-50	20	30	TEM	*	Spheroidal	*	*	*	25	TEM	*	*	*	*	*	*	*	*	*	*	*	*	Solid	Artificial	OECD soil	Light	16
318	SR	Article	Soil	Mariyadas	2018	10.1002/etc.3944	Earthworm avoidance of silver nanomaterials over time	Mariyadas et al 2018. Earthworm avoidance of silver nanomaterials over time. Environmental Pollution, 239, 751-756	AgNM	AgNM	AG-M-03M-NPCP.020N (American Elements)	Powder	Ag	*	99	1	PVP	9003-39-8	0.2	*	25	20-50	20	30	TEM	*	Spheroidal	*	*	*	25	TEM	*	*	*	*	*	*	*	*	*	*	*	*	Solid	Artificial	OECD soil	Light	16
319	SR	Article	Soil	Mariyadas	2018	10.1002/etc.3944	Earthworm avoidance of silver nanomaterials over time	Mariyadas et al 2018. Earthworm avoidance of silver nanomaterials over time. Environmental Pollution, 239, 751-756	AgNM	AgNM	AG-M-03M-NPCP.020N (American Elements)	Powder	Ag	*	99	1	PVP	9003-39-8	0.2	*	25	20-50	20	30	TEM	*	Spheroidal	*	*	*	25	TEM	*	*	*	*	*	*	*	*	*	*	*	*	Solid	Artificial	OECD soil	Light	16
320	SR	Article	Soil	Mariyadas	2018	10.1002/etc.3944	Earthworm avoidance of silver nanomaterials over time	Mariyadas et al 2018. Earthworm avoidance of silver nanomaterials over time. Environmental Pollution, 239, 751-756	AgNM	AgNM	AG-M-03M-NPCP.020N (American Elements)	Powder	Ag	*	99	1	PVP	9003-39-8	0.2	*	25	20-50	20	30	TEM	*	Spheroidal	*	*	*	25	TEM	*	*	*	*	*	*	*	*	*	*	*	*	Solid	Artificial	OECD soil	Light	16
321	SR	Article	Soil	Mariyadas	2018	10.1002/etc.3944	Earthworm avoidance of silver nanomaterials over time	Mariyadas et al 2018. Earthworm avoidance of silver nanomaterials over time. Environmental Pollution, 239, 751-756	AgNM	AgNM	AG-M-03M-NPCP.020N (American Elements)	Powder	Ag	*	99	1	PVP	9003-39-8	0.2	*	25	20-50	20	30	TEM	*	Spheroidal	*	*	*	25	TEM	*	*	*	*	*	*	*	*	*	*	*	*	Solid	Artificial	OECD soil	Light	16
322	SR	Article	Soil	Mariyadas	2018	10.1002/etc.3944	Earthworm avoidance of silver nanomaterials over time	Mariyadas et al 2018. Earthworm avoidance of silver nanomaterials over time. Environmental Pollution, 239, 751-756	AgNM	AgNM	AG-M-03M-NPCP.020N (American Elements)	Powder	Ag	*	99	1	PVP	9003-39-8	0.2	*	25	20-50	20	30	TEM	*	Spheroidal	*	*	*	25	TEM	*	*	*	*	*	*	*	*	*	*	*	*	Solid	Artificial	OECD soil	Light	16
323	SR	Article	Soil	Mariyadas	2018	10.1002/etc.3944	Earthworm avoidance of silver nanomaterials over time	Mariyadas et al 2018. Earthworm avoidance of silver nanomaterials over time. Environmental Pollution, 239, 751-756	AgNM	AgNM	AG-M-03M-NPCP.020N (American Elements)	Powder	Ag	*	99	1	PVP	9003-39-8	0.2	*	25	20-50	20	30	TEM	*	Spheroidal	*	*	*	25	TEM	*	*	*	*	*	*	*	*	*	*	*	*	Solid	Artificial	OECD soil	Light	16
324	SR	Article	Soil	Mariyadas	2018	10.1002/etc.3944	Earthworm avoidance of silver nanomaterials over time	Mariyadas et al 2018. Earthworm avoidance of silver nanomaterials over time. Environmental Pollution, 239, 751-756	AgNM	AgNM	AG-M-03M-NPCP.020N (American Elements)	Powder	Ag	*	99	1	PVP	9003-39-8	0.2	*	25	20-50	20	30	TEM	*	Spheroidal	*	*	*	25	TEM	*	*	*	*	*	*	*	*	*	*	*	*	Solid	Artificial	OECD soil	Light	16
325	SR	Article	Soil	Schlich	2015	10.1016/j.envpol.2014.10.021	Influence of soil properties on the effect of silver nanomaterials on microbial activity in five soils	Schlich et al 2015. Influence of soil properties on the effect of silver nanomaterials on microbial activity in five soils. Environmental Pollution, 196, 321-330	NM300K	AgNM	JRC	Suspension	Ag	*	*	89.8	Tween	9005-70-3	8% (4% each)	*	15	Below 20	*	*	TEM	*	Spheroidal	*	*	*	*	TEM	5	*	MilliQ Water and 10.2% of Ag in suspension	*	52.31	Mean	NTA	*	*	*	*	*	Solid	Artificial	RefeSol 01A	*	*
326	SR	Article	Soil	Schlich	2015	10.1016/j.envpol.2014.10.021	Influence of soil properties on the effect of silver nanomaterials on microbial activity in five soils	Schlich et al 2015. Influence of soil properties on the effect of silver nanomaterials on microbial activity in five soils. Environmental Pollution, 196, 321-330	NM300K	AgNM	JRC	Suspension	Ag	*	*	89.8	Tween	9005-70-3	8% (4% each)	*	15	Below 20	*	*	TEM	*	Spheroidal	*	*	*	*	TEM	5	*	MilliQ Water and 10.2% of Ag in suspension	*	52.31	Mean	NTA	*	*	*	*	*	Solid	Artificial	RefeSol 01A	*	*
327	SR	Article	Soil	Schlich	2015	10.1016/j.envpol.2014.10.021	Influence of soil properties on the effect of silver nanomaterials on microbial activity in five soils	Schlich et al 2015. Influence of soil properties on the effect of silver nanomaterials on microbial activity in five soils. Environmental Pollution, 196, 321-330	NM300K	AgNM	JRC	Suspension	Ag	*	*	89.8	Tween	9005-70-3	8% (4% each)	*	15	Below 20	*	*	TEM	*	Spheroidal	*	*	*	*	TEM	5	*	MilliQ Water and 10.2% of Ag in suspension	*	52.31	Mean	NTA	*	*	*	*	*	Solid	Artificial	RefeSol 02A	Dark	*
328	SR	Article	Soil	Schlich	2015	10.1016/j.envpol.2014.10.021	Influence of soil properties on the effect of silver nanomaterials on microbial activity in five soils	Schlich et al 2015. Influence of soil properties on the effect of silver nanomaterials on microbial activity in five soils. Environmental Pollution, 196, 321-330	NM300K	AgNM	JRC	Suspension	Ag	*	*	89.8	Tween	9005-70-3	8% (4% each)	*	15	Below 20	*	*	TEM	*	Spheroidal	*	*	*	*	TEM	5	*	MilliQ Water and 10.2% of Ag in suspension	*	52.31	Mean	NTA	*	*	*	*	*	Solid	Artificial	RefeSol 02A	Dark	*
329	SR	Article	Soil	Schlich	2015	10.1016/j.envpol.2014.10.021	Influence of soil properties on the effect of silver nanomaterials on microbial activity in five soils	Schlich et al 2015. Influence of soil properties on the effect of silver nanomaterials on microbial activity in five soils. Environmental Pollution, 196, 321-330	NM300K	AgNM	JRC	Suspension	Ag	*	*	89.8	Tween	9005-70-3	8% (4% each)	*	15	Below 20	*	*	TEM	*	Spheroidal	*	*	*	*	TEM	5	*	MilliQ Water and 10.2% of Ag in suspension	*	52.31	Mean	NTA	*	*	*	*	*	Solid	Artificial	RefeSol 04A	Dark	*
330	SR	Article	Soil	Schlich	2015	10.1016/j.envpol.2014.10.021	Influence of soil properties on the effect of silver nanomaterials on microbial activity in five soils	Schlich et al 2015. Influence of soil properties on the effect of silver nanomaterials on microbial activity in five soils. Environmental Pollution, 196, 321-330	NM300K	AgNM	JRC	Suspension	Ag	*	*	89.8	Tween	9005-70-3	8% (4% each)	*	15	Below 20	*	*	TEM	*	Spheroidal	*	*	*	*	TEM	5	*	MilliQ Water and 10.2% of Ag in suspension	*	52.31	Mean	NTA	*	*	*	*	*	Solid	Artificial	RefeSol 04A	Dark	*
331	SR	Article	Soil	Schlich	2015	10.1016/j.envpol.2014.10.021	Influence of soil properties on the effect of silver nanomaterials on microbial activity in five soils	Schlich et al 2015. Influence of soil properties on the effect of silver nanomaterials on microbial activity in five soils. Environmental Pollution, 196, 321-330	NM300K	AgNM	JRC	Suspension	Ag	*	*	89.8	Tween	9005-70-3	8% (4% each)	*	15	Below 20	*	*	TEM	*	Spheroidal	*	*	*	*	TEM	5	*	MilliQ Water and 10.2% of Ag in suspension	*	52.31	Mean	NTA	*	*	*	*	*	Solid	Artificial	RefeSol 03G	Dark	*
332	SR	Article	Soil	Schlich	2015	10.1016/j.envpol.2014.10.021	Influence of soil properties on the effect of silver nanomaterials on microbial activity in five soils	Schlich et al 2015. Influence of soil properties on the effect of silver nanomaterials on microbial activity in five soils. Environmental Pollution, 196, 321-330	NM300K	AgNM	JRC	Suspension	Ag	*	*	89.8	Tween	9005-70-3	8% (4% each)	*	15	Below 20	*	*	TEM	*	Spheroidal	*	*	*	*	TEM	5	*	MilliQ Water and 10.2% of Ag in suspension	*	52.31	Mean	NTA	*	*	*	*	*	Solid	Artificial	RefeSol 03G	Dark	*
333	SR	Article	Soil	Schlich	2013	10.1002/etc.2030	Effects of silver nanoparticles and silver nitrate in the earthworm reproduction test	Schlich et al 2013. Effects of silver nanoparticles and silver nitrate in the earthworm reproduction test. Environmental Toxicology and Chemistry, 32, 1, 181-188	NM300K	AgNM	JRC	Suspension	Ag	*	*	89.8	Tween	9005-70-3	8% (4% each)	*	15	Below 20	*	*	TEM	*	Spheroidal	*	*	*	*	*	*	*	MilliQ Water and 10.2% of Ag in suspension	*	52.31	Mean	NTA	*	*	*	*	*	Solid	Artificial	RefeSol 01A	Light	16
334	SR	Article	Soil	Schlich	2013	10.1002/etc.2030	Effects of silver nanoparticles and silver nitrate in the earthworm reproduction test	Schlich et al 2013. Effects of silver nanoparticles and silver nitrate in the earthworm reproduction test. Environmental Toxicology and Chemistry, 32, 1, 181-188	NM300K	AgNM	JRC	Suspension	Ag	*	*	89.8	Tween	9005-70-3	8% (4% each)	*	15	Below 20	*	*	TEM	*	Spheroidal	*	*	*	*	*	*	*	MilliQ Water and 10.2% of Ag in suspension	*	52.31	Mean	NTA	*	*	*	*	*	Solid	Artificial	RefeSol 01A	Light	16
335	SR	Article	Soil	Schlich	2013	10.1002/etc.2030	Effects of silver nanoparticles and silver nitrate in the earthworm reproduction test	Schlich et al 2013. Effects of silver nanoparticles and silver nitrate in the earthworm reproduction test. Environmental Toxicology and Chemistry, 32, 1, 181-188	NM300K	AgNM	JRC	Suspension	Ag	*	*	89.8	Tween	9005-70-3	8% (4% each)	*	15	Below 20	*	*	TEM	*	Spheroidal	*	*	*	*	*	*	*	MilliQ Water and 10.2% of Ag in suspension	*	52.31	Mean	NTA	*	*	*	*	*	Solid	Artificial	RefeSol 01A	Light	16
336	SR	Article	Soil	Schlich	2013	10.1002/etc.2030	Effects of silver nanoparticles and silver nitrate in the earthworm reproduction test	Schlich et al 2013. Effects of silver nanoparticles and silver nitrate in the earthworm reproduction test. Environmental Toxicology and Chemistry, 32, 1, 181-188	NM300K	AgNM	JRC	Suspension	Ag	*	*	89.8	Tween	9005-70-3	8% (4% each)	*	15	Below 20	*	*	TEM	*	Spheroidal	*	*	*	*	*	*	*	MilliQ Water and 10.2% of Ag in suspension	*	52.31	Mean	NTA	*	*	*	*	*	Solid	Artificial	RefeSol 01A	Light	16
337	SR	Article	Soil	Schlich	2013	10.1002/etc.2030	Effects of silver nanoparticles and silver nitrate in the earthworm reproduction test	Schlich et al 2013. Effects of silver nanoparticles and silver nitrate in the earthworm reproduction test. Environmental Toxicology and Chemistry, 32, 1, 181-188	NM300K	AgNM	JRC	Suspension	Ag	*	*	89.8	Tween	9005-70-3	8% (4% each)	*	15	Below 20	*	*	TEM	*	Spheroidal	*	*	*	*	*	*	*	MilliQ Water and 10.2% of Ag in suspension	*	52.31	Mean	NTA	*	*	*	*	*	Solid	Artificial	RefeSol 01A	Light	16
338	SR	Article	Soil	Schlich	2013	10.1002/etc.2030	Effects of silver nanoparticles and silver nitrate in the earthworm reproduction test	Schlich et al 2013. Effects of silver nanoparticles and silver nitrate in the earthworm reproduction test. Environmental Toxicology and Chemistry, 32, 1, 181-188	NM300K	AgNM	JRC	Suspension	Ag	*	*	89.8	Tween	9005-70-3	8% (4% each)	*	15	Below 20	*	*	TEM	*	Spheroidal	*	*	*	*	*	*	*	MilliQ Water and 10.2% of Ag in suspension	*	52.31	Mean	NTA	*	*	*	*	*	Solid	Artificial	RefeSol 01A	Light	16
339	SR	Article	Soil	Schlich	2013	10.1002/etc.2030	Effects of silver nanoparticles and silver nitrate in the earthworm reproduction test	Schlich et al 2013. Effects of silver nanoparticles and silver nitrate in the earthworm reproduction test. Environmental Toxicology and Chemistry, 32, 1, 181-188	NM300K	AgNM	JRC	Suspension	Ag	*	*	89.8	Tween	9005-70-3	8% (4% each)	*	15	Below 20	*	*	TEM	*	Spheroidal	*	*	*	*	*	*	*	MilliQ Water and 10.2% of Ag in suspension	*	52.31	Mean	NTA	*	*	*	*	*	Solid	Artificial	RefeSol 01A	Light	16
340	SR	Article	Soil	Schlich	2013	10.1002/etc.2030	Effects of silver nanoparticles and silver nitrate in the earthworm reproduction test	Schlich et al 2013. Effects of silver nanoparticles and silver nitrate in the earthworm reproduction test. Environmental Toxicology and Chemistry, 32, 1, 181-188	NM300K	AgNM	JRC	Suspension	Ag	*	*	89.8	Tween	9005-70-3	8% (4% each)	*	15	Below 20	*	*	TEM	*	Spheroidal	*	*	*	*	*	*	*	MilliQ Water and 10.2% of Ag in suspension	*	52.31	Mean	NTA	*	*	*	*	*	Solid	Artificial	RefeSol 01A	Light	16
341	SR	Article	Soil	Schlich	2013	10.1002/etc.2030	Effects of silver nanoparticles and silver nitrate in the earthworm reproduction test	Schlich et al 2013. Effects of silver nanoparticles and silver nitrate in the earthworm reproduction test. Environmental Toxicology and Chemistry, 32, 1, 181-188	NM300K	AgNM	JRC	Suspension	Ag	*	*	89.8	Tween	9005-70-3	8% (4% each)	*	15	Below 20	*	*	TEM	*	Spheroidal	*	*	*	*	*	*	*	MilliQ Water and 10.2% of Ag in suspension	*	52.31	Mean	NTA	*	*	*	*	*	Solid	Artificial	RefeSol 01A	Light	16
342	SR	Article	Soil	Schlich	2013	10.1002/etc.2030	Effects of silver nanoparticles and silver nitrate in the earthworm reproduction test	Schlich et al 2013. Effects of silver nanoparticles and silver nitrate in the earthworm reproduction test. Environmental Toxicology and Chemistry, 32, 1, 181-188	NM300K	AgNM	JRC	Suspension	Ag	*	*	89.8	Tween	9005-70-3	8% (4% each)	*	15	Below 20	*	*	TEM	*	Spheroidal	*	*	*	*	*	*	*	MilliQ Water and 10.2% of Ag in suspension	*	52.31	Mean	NTA	*	*	*	*	*	Solid	Artificial	RefeSol 01A	Light	16
343	SR	Article	Soil	Schlich	2013	10.1002/etc.2030	Effects of silver nanoparticles and silver nitrate in the earthworm reproduction test	Schlich et al 2013. Effects of silver nanoparticles and silver nitrate in the earthworm reproduction test. Environmental Toxicology and Chemistry, 32, 1, 181-188	NM300K	AgNM	JRC	Suspension	Ag	*	*	89.8	Tween	9005-70-3	8% (4% each)	*	15	Below 20	*	*	TEM	*	Spheroidal	*	*	*	*	*	*	*	MilliQ Water and 10.2% of Ag in suspension	*	52.31	Mean	NTA	*	*	*	*	*	Solid	Artificial	RefeSol 01A	Light	16
344	SR	Article	Soil	Schlich	2013	10.1002/etc.2030	Effects of silver nanoparticles and silver nitrate in the earthworm reproduction test	Schlich et al 2013. Effects of silver nanoparticles and silver nitrate in the earthworm reproduction test. Environmental Toxicology and Chemistry, 32, 1, 181-188	NM300K	AgNM	JRC	Suspension	Ag	*	*	89.8	Tween	9005-70-3	8% (4% each)	*	15	Below 20	*	*	TEM	*	Spheroidal	*	*	*	*	*	*	*	MilliQ Water and 10.2% of Ag in suspension	*	52.31	Mean	NTA	*	*	*	*	*	Solid	Artificial	RefeSol 01A	Light	16
345	SR	Article	Soil	Schlich	2013	10.1002/etc.2030	Effects of silver nanoparticles and silver nitrate in the earthworm reproduction test	Schlich et al 2013. Effects of silver nanoparticles and silver nitrate in the earthworm reproduction test. Environmental Toxicology and Chemistry, 32, 1, 181-188	AgNO3		Merck KGaA	*	Ag	7761-88-8	*	*	*	*	*	*	Unreported	Unreported	*	*	*	*	*	*	*	*	*	*	*	*	*	*	*	*	*	*	*	*	*	*	Solid	Artificial	RefeSol 01A	Light	16
346	SR	Article	Soil	Schlich	2013	10.1002/etc.2030	Effects of silver nanoparticles and silver nitrate in the earthworm reproduction test	Schlich et al 2013. Effects of silver nanoparticles and silver nitrate in the earthworm reproduction test. Environmental Toxicology and Chemistry, 32, 1, 181-188	AgNO3		Merck KGaA	*	Ag	7761-88-8	*	*	*	*	*	*	Unreported	Unreported	*	*	*	*	*	*	*	*	*	*	*	*	*	*	*	*	*	*	*	*	*	*	Solid	Artificial	RefeSol 01A	Light	16
347	SR	Article	Soil	Schlich	2013	10.1002/etc.2030	Effects of silver nanoparticles and silver nitrate in the earthworm reproduction test	Schlich et al 2013. Effects of silver nanoparticles and silver nitrate in the earthworm reproduction test. Environmental Toxicology and Chemistry, 32, 1, 181-188	AgNO3		Merck KGaA	*	Ag	7761-88-8	*	*	*	*	*	*	Unreported	Unreported	*	*	*	*	*	*	*	*	*	*	*	*	*	*	*	*	*	*	*	*	*	*	Solid	Artificial	RefeSol 01A	Light	16
348	SR	Article	Soil	Schlich	2013	10.1002/etc.2030	Effects of silver nanoparticles and silver nitrate in the earthworm reproduction test	Schlich et al 2013. Effects of silver nanoparticles and silver nitrate in the earthworm reproduction test. Environmental Toxicology and Chemistry, 32, 1, 181-188	AgNO3		Merck KGaA	*	Ag	7761-88-8	*	*	*	*	*	*	Unreported	Unreported	*	*	*	*	*	*	*	*	*	*	*	*	*	*	*	*	*	*	*	*	*	*	Solid	Artificial	RefeSol 01A	Light	16
349	SR	Article	Soil	Schlich	2013	10.1002/etc.2030	Effects of silver nanoparticles and silver nitrate in the earthworm reproduction test	Schlich et al 2013. Effects of silver nanoparticles and silver nitrate in the earthworm reproduction test. Environmental Toxicology and Chemistry, 32, 1, 181-188	AgNO3		Merck KGaA	*	Ag	7761-88-8	*	*	*	*	*	*	Unreported	Unreported	*	*	*	*	*	*	*	*	*	*	*	*	*	*	*	*	*	*	*	*	*	*	Solid	Artificial	RefeSol 01A	Light	16
350	SR	Article	Soil	Schlich	2013	10.1002/etc.2030	Effects of silver nanoparticles and silver nitrate in the earthworm reproduction test	Schlich et al 2013. Effects of silver nanoparticles and silver nitrate in the earthworm reproduction test. Environmental Toxicology and Chemistry, 32, 1, 181-188	AgNO3		Merck KGaA	*	Ag	7761-88-8	*	*	*	*	*	*	Unreported	Unreported	*	*	*	*	*	*	*	*	*	*	*	*	*	*	*	*	*	*	*	*	*	*	Solid	Artificial	RefeSol 01A	Light	16
351	SR	Article	Soil	Kleiven	2018	10.1002/etc.4144	Characterizing the behaviour, uptake, and toxicity of NM300K silver nanoparticles in Caenorhabditis elegans	Kleiven et al 2018. Characterizing the behaviour, uptake, and toxicity of NM300K silver nanoparticles in Caenorhabditis elegans. Environmental Toxicology and Chemistry, 37, 7, 1799-1810	NM300K	AgNM	JRC	Suspension	Ag	*	*	89.8	Tween	9005-70-3	8% (4% each)	*	15	Below 20	*	*	TEM	*	Spheroidal	*	*	*	*	*	*	*	MilliQ Water and 10.2% of Ag in suspension	For 13 mins at 15% amplitude	52.31	Mean	NTA	*	*	*	*	*	Liquid	Artificial	*	Dark	*
352	SR	Article	Soil	Kleiven	2018	10.1002/etc.4144	Characterizing the behaviour, uptake, and toxicity of NM300K silver nanoparticles in Caenorhabditis elegans	Kleiven et al 2018. Characterizing the behaviour, uptake, and toxicity of NM300K silver nanoparticles in Caenorhabditis elegans. Environmental Toxicology and Chemistry, 37, 7, 1799-1810	NM300K	AgNM	JRC	Suspension	Ag	*	*	89.8	Tween	9005-70-3	8% (4% each)	*	15	Below 20	*	*	TEM	*	Spheroidal	*	*	*	*	*	*	*	MilliQ Water and 10.2% of Ag in suspension	For 13 mins at 15% amplitude	52.31	Mean	NTA	*	*	0.3665	-4.17	*	Liquid	Artificial	*	Dark	*
353	SR	Article	Soil	Kleiven	2018	10.1002/etc.4144	Characterizing the behaviour, uptake, and toxicity of NM300K silver nanoparticles in Caenorhabditis elegans	Kleiven et al 2018. Characterizing the behaviour, uptake, and toxicity of NM300K silver nanoparticles in Caenorhabditis elegans. Environmental Toxicology and Chemistry, 37, 7, 1799-1810	NM300K	AgNM	JRC	Suspension	Ag	*	*	89.8	Tween	9005-70-3	8% (4% each)	*	15	Below 20	*	*	TEM	*	Spheroidal	*	*	*	*	*	*	*	MilliQ Water and 10.2% of Ag in suspension	For 13 mins at 15% amplitude	52.31	Mean	NTA	*	*	0.3665	-4.17	*	Liquid	Artificial	*	Dark	*
354	SR	Article	Soil	Kleiven	2018	10.1002/etc.4144	Characterizing the behaviour, uptake, and toxicity of NM300K silver nanoparticles in Caenorhabditis elegans	Kleiven et al 2018. Characterizing the behaviour, uptake, and toxicity of NM300K silver nanoparticles in Caenorhabditis elegans. Environmental Toxicology and Chemistry, 37, 7, 1799-1810	NM300K	AgNM	JRC	Suspension	Ag	*	*	89.8	Tween	9005-70-3	8% (4% each)	*	15	Below 20	*	*	TEM	*	Spheroidal	*	*	*	*	*	*	*	MilliQ Water and 10.2% of Ag in suspension	For 13 mins at 15% amplitude	52.31	Mean	NTA	*	*	0.3665	-4.17	*	Liquid	Artificial	*	Dark	*
355	SR	Article	Soil	Kleiven	2018	10.1002/etc.4144	Characterizing the behaviour, uptake, and toxicity of NM300K silver nanoparticles in Caenorhabditis elegans	Kleiven et al 2018. Characterizing the behaviour, uptake, and toxicity of NM300K silver nanoparticles in Caenorhabditis elegans. Environmental Toxicology and Chemistry, 37, 7, 1799-1810	NM300K	AgNM	JRC	Suspension	Ag	*	*	89.8	Tween	9005-70-3	8% (4% each)	*	15	Below 20	*	*	TEM	*	Spheroidal	*	*	*	*	*	*	*	MilliQ Water and 10.2% of Ag in suspension	For 13 mins at 15% amplitude	52.31	Mean	NTA	*	*	0.3665	-4.17	*	Liquid	Artificial	*	Dark	*
356	SR	Article	Soil	Kleiven	2018	10.1002/etc.4144	Characterizing the behaviour, uptake, and toxicity of NM300K silver nanoparticles in Caenorhabditis elegans	Kleiven et al 2018. Characterizing the behaviour, uptake, and toxicity of NM300K silver nanoparticles in Caenorhabditis elegans. Environmental Toxicology and Chemistry, 37, 7, 1799-1810	NM300K	AgNM	JRC	Suspension	Ag	*	*	89.8	Tween	9005-70-3	8% (4% each)	*	15	Below 20	*	*	TEM	*	Spheroidal	*	*	*	*	*	*	*	MilliQ Water and 10.2% of Ag in suspension	For 13 mins at 15% amplitude	52.31	Mean	NTA	*	*	0.3665	-4.17	*	Liquid	Artificial	*	Dark	*
357	SR	Article	Soil	Kleiven	2018	10.1002/etc.4144	Characterizing the behaviour, uptake, and toxicity of NM300K silver nanoparticles in Caenorhabditis elegans	Kleiven et al 2018. Characterizing the behaviour, uptake, and toxicity of NM300K silver nanoparticles in Caenorhabditis elegans. Environmental Toxicology and Chemistry, 37, 7, 1799-1810	NM300K	AgNM	JRC	Suspension	Ag	*	*	89.8	Tween	9005-70-3	8% (4% each)	*	15	Below 20	*	*	TEM	*	Spheroidal	*	*	*	*	*	*	*	MilliQ Water and 10.2% of Ag in suspension	For 13 mins at 15% amplitude	52.31	Mean	NTA	*	*	0.3665	-4.17	*	Liquid	Artificial	*	Dark	*
358	SR	Article	Soil	Kleiven	2018	10.1002/etc.4144	Characterizing the behaviour, uptake, and toxicity of NM300K silver nanoparticles in Caenorhabditis elegans	Kleiven et al 2018. Characterizing the behaviour, uptake, and toxicity of NM300K silver nanoparticles in Caenorhabditis elegans. Environmental Toxicology and Chemistry, 37, 7, 1799-1810	NM300K	AgNM	JRC	Suspension	Ag	*	*	89.8	Tween	9005-70-3	8% (4% each)	*	15	Below 20	*	*	TEM	*	Spheroidal	*	*	*	*	*	*	*	MilliQ Water and 10.2% of Ag in suspension	For 13 mins at 15% amplitude	52.31	Mean	NTA	*	*	0.3665	-4.17	*	Liquid	Artificial	*	Dark	*
359	SR	Article	Soil	Kleiven	2018	10.1002/etc.4144	Characterizing the behaviour, uptake, and toxicity of NM300K silver nanoparticles in Caenorhabditis elegans	Kleiven et al 2018. Characterizing the behaviour, uptake, and toxicity of NM300K silver nanoparticles in Caenorhabditis elegans. Environmental Toxicology and Chemistry, 37, 7, 1799-1810	NM300K	AgNM	JRC	Suspension	Ag	*	*	89.8	Tween	9005-70-3	8% (4% each)	*	15	Below 20	*	*	TEM	*	Spheroidal	*	*	*	*	*	*	*	MilliQ Water and 10.2% of Ag in suspension	For 13 mins at 15% amplitude	52.31	Mean	NTA	*	*	0.3665	-4.17	*	Liquid	Artificial	*	Dark	*
360	SR	Article	Soil	Kleiven	2018	10.1002/etc.4144	Characterizing the behaviour, uptake, and toxicity of NM300K silver nanoparticles in Caenorhabditis elegans	Kleiven et al 2018. Characterizing the behaviour, uptake, and toxicity of NM300K silver nanoparticles in Caenorhabditis elegans. Environmental Toxicology and Chemistry, 37, 7, 1799-1810	NM300K	AgNM	JRC	Suspension	Ag	*	*	89.8	Tween	9005-70-3	8% (4% each)	*	15	Below 20	*	*	TEM	*	Spheroidal	*	*	*	*	*	*	*	MilliQ Water and 10.2% of Ag in suspension	For 13 mins at 15% amplitude	52.31	Mean	NTA	*	*	0.3665	-4.17	*	Liquid	Artificial	*	Dark	*
361	SR	Article	Soil	Kleiven	2018	10.1002/etc.4144	Characterizing the behaviour, uptake, and toxicity of NM300K silver nanoparticles in Caenorhabditis elegans	Kleiven et al 2018. Characterizing the behaviour, uptake, and toxicity of NM300K silver nanoparticles in Caenorhabditis elegans. Environmental Toxicology and Chemistry, 37, 7, 1799-1810	NM300K	AgNM	JRC	Suspension	Ag	*	*	89.8	Tween	9005-70-3	8% (4% each)	*	15	Below 20	*	*	TEM	*	Spheroidal	*	*	*	*	*	*	*	MilliQ Water and 10.2% of Ag in suspension	For 13 mins at 15% amplitude	52.31	Mean	NTA	*	*	0.3665	-4.17	*	Liquid	Artificial	*	Dark	*
362	SR	Article	Soil	Kleiven	2018	10.1002/etc.4144	Characterizing the behaviour, uptake, and toxicity of NM300K silver nanoparticles in Caenorhabditis elegans	Kleiven et al 2018. Characterizing the behaviour, uptake, and toxicity of NM300K silver nanoparticles in Caenorhabditis elegans. Environmental Toxicology and Chemistry, 37, 7, 1799-1810	NM300K	AgNM	JRC	Suspension	Ag	*	*	89.8	Tween	9005-70-3	8% (4% each)	*	15	Below 20	*	*	TEM	*	Spheroidal	*	*	*	*	*	*	*	MilliQ Water and 10.2% of Ag in suspension	For 13 mins at 15% amplitude	52.31	Mean	NTA	*	*	0.3665	-4.17	*	Liquid	Artificial	*	Dark	*
363	SR	Article	Soil	Kleiven	2018	10.1002/etc.4144	Characterizing the behaviour, uptake, and toxicity of NM300K silver nanoparticles in Caenorhabditis elegans	Kleiven et al 2018. Characterizing the behaviour, uptake, and toxicity of NM300K silver nanoparticles in Caenorhabditis elegans. Environmental Toxicology and Chemistry, 37, 7, 1799-1810	NM300K	AgNM	JRC	Suspension	Ag	*	*	89.8	Tween	9005-70-3	8% (4% each)	*	15	Below 20	*	*	TEM	*	Spheroidal	*	*	*	*	*	*	*	MilliQ Water and 10.2% of Ag in suspension	For 13 mins at 15% amplitude	52.31	Mean	NTA	*	*	0.3665	-4.17	*	Liquid	Artificial	*	Dark	*
364	SR	Article	Soil	Kleiven	2018	10.1002/etc.4144	Characterizing the behaviour, uptake, and toxicity of NM300K silver nanoparticles in Caenorhabditis elegans	Kleiven et al 2018. Characterizing the behaviour, uptake, and toxicity of NM300K silver nanoparticles in Caenorhabditis elegans. Environmental Toxicology and Chemistry, 37, 7, 1799-1810	NM300K	AgNM	JRC	Suspension	Ag	*	*	89.8	Tween	9005-70-3	8% (4% each)	*	15	Below 20	*	*	TEM	*	Spheroidal	*	*	*	*	*	*	*	MilliQ Water and 10.2% of Ag in suspension	For 13 mins at 15% amplitude	52.31	Mean	NTA	*	*	0.3665	-4.17	*	Liquid	Artificial	*	Dark	*
365	SR	Article	Soil	Kleiven	2018	10.1002/etc.4144	Characterizing the behaviour, uptake, and toxicity of NM300K silver nanoparticles in Caenorhabditis elegans	Kleiven et al 2018. Characterizing the behaviour, uptake, and toxicity of NM300K silver nanoparticles in Caenorhabditis elegans. Environmental Toxicology and Chemistry, 37, 7, 1799-1810	NM300K	AgNM	JRC	Suspension	Ag	*	*	89.8	Tween	9005-70-3	8% (4% each)	*	15	Below 20	*	*	TEM	*	Spheroidal	*	*	*	*	*	*	*	MilliQ Water and 10.2% of Ag in suspension	For 13 mins at 15% amplitude	52.31	Mean	NTA	*	*	0.3665	-4.17	*	Liquid	Artificial	*	Dark	*
366	SR	Article	Soil	Kleiven	2018	10.1002/etc.4144	Characterizing the behaviour, uptake, and toxicity of NM300K silver nanoparticles in Caenorhabditis elegans	Kleiven et al 2018. Characterizing the behaviour, uptake, and toxicity of NM300K silver nanoparticles in Caenorhabditis elegans. Environmental Toxicology and Chemistry, 37, 7, 1799-1810	NM300K	AgNM	JRC	Suspension	Ag	*	*	89.8	Tween	9005-70-3	8% (4% each)	*	15	Below 20	*	*	TEM	*	Spheroidal	*	*	*	*	*	*	*	MilliQ Water and 10.2% of Ag in suspension	For 13 mins at 15% amplitude	52.31	Mean	NTA	*	*	0.3665	-4.17	*	Liquid	Artificial	*	Dark	*
367	SR	Article	Soil	Kleiven	2018	10.1002/etc.4144	Characterizing the behaviour, uptake, and toxicity of NM300K silver nanoparticles in Caenorhabditis elegans	Kleiven et al 2018. Characterizing the behaviour, uptake, and toxicity of NM300K silver nanoparticles in Caenorhabditis elegans. Environmental Toxicology and Chemistry, 37, 7, 1799-1810	NM300K	AgNM	JRC	Suspension	Ag	*	*	89.8	Tween	9005-70-3	8% (4% each)	*	15	Below 20	*	*	TEM	*	Spheroidal	*	*	*	*	*	*	*	MilliQ Water and 10.2% of Ag in suspension	For 13 mins at 15% amplitude	52.31	Mean	NTA	*	*	0.3665	-4.17	*	Liquid	Artificial	*	Dark	*
368	SR	Article	Soil	Kleiven	2018	10.1002/etc.4144	Characterizing the behaviour, uptake, and toxicity of NM300K silver nanoparticles in Caenorhabditis elegans	Kleiven et al 2018. Characterizing the behaviour, uptake, and toxicity of NM300K silver nanoparticles in Caenorhabditis elegans. Environmental Toxicology and Chemistry, 37, 7, 1799-1810	NM300K	AgNM	JRC	Suspension	Ag	*	*	89.8	Tween	9005-70-3	8% (4% each)	*	15	Below 20	*	*	TEM	*	Spheroidal	*	*	*	*	*	*	*	MilliQ Water and 10.2% of Ag in suspension	For 13 mins at 15% amplitude	52.31	Mean	NTA	*	*	*	*	*	Liquid	Artificial	*	Dark	*
369	SR	Article	Soil	Kleiven	2018	10.1002/etc.4144	Characterizing the behaviour, uptake, and toxicity of NM300K silver nanoparticles in Caenorhabditis elegans	Kleiven et al 2018. Characterizing the behaviour, uptake, and toxicity of NM300K silver nanoparticles in Caenorhabditis elegans. Environmental Toxicology and Chemistry, 37, 7, 1799-1810	AgNO3		*	Suspension	Ag	7761-88-8	*	*	*	*	*	*	Unreported	Unreported	*	*	*	*	*	*	*	*	*	*	*	*	*	*	*	*	*	*	*	*	*	*	Liquid	Artificial	*	Dark	*
370	SR	Article	Soil	Kleiven	2018	10.1002/etc.4144	Characterizing the behaviour, uptake, and toxicity of NM300K silver nanoparticles in Caenorhabditis elegans	Kleiven et al 2018. Characterizing the behaviour, uptake, and toxicity of NM300K silver nanoparticles in Caenorhabditis elegans. Environmental Toxicology and Chemistry, 37, 7, 1799-1810	AgNO3		*	Suspension	Ag	7761-88-8	*	*	*	*	*	*	Unreported	Unreported	*	*	*	*	*	*	*	*	*	*	*	*	*	*	*	*	*	*	*	*	*	*	Liquid	Artificial	*	Dark	*
371	SR	Article	Soil	Kleiven	2018	10.1002/etc.4144	Characterizing the behaviour, uptake, and toxicity of NM300K silver nanoparticles in Caenorhabditis elegans	Kleiven et al 2018. Characterizing the behaviour, uptake, and toxicity of NM300K silver nanoparticles in Caenorhabditis elegans. Environmental Toxicology and Chemistry, 37, 7, 1799-1810	AgNO3		*	Suspension	Ag	7761-88-8	*	*	*	*	*	*	Unreported	Unreported	*	*	*	*	*	*	*	*	*	*	*	*	*	*	*	*	*	*	*	*	*	*	Liquid	Artificial	*	Dark	*
372	SR	Article	Soil	Kleiven	2018	10.1002/etc.4144	Characterizing the behaviour, uptake, and toxicity of NM300K silver nanoparticles in Caenorhabditis elegans	Kleiven et al 2018. Characterizing the behaviour, uptake, and toxicity of NM300K silver nanoparticles in Caenorhabditis elegans. Environmental Toxicology and Chemistry, 37, 7, 1799-1810	AgNO3		*	Suspension	Ag	7761-88-8	*	*	*	*	*	*	Unreported	Unreported	*	*	*	*	*	*	*	*	*	*	*	*	*	*	*	*	*	*	*	*	*	*	Liquid	Artificial	*	Dark	*
373	SR	Article	Soil	Kleiven	2018	10.1002/etc.4144	Characterizing the behaviour, uptake, and toxicity of NM300K silver nanoparticles in Caenorhabditis elegans	Kleiven et al 2018. Characterizing the behaviour, uptake, and toxicity of NM300K silver nanoparticles in Caenorhabditis elegans. Environmental Toxicology and Chemistry, 37, 7, 1799-1810	AgNO3		*	Suspension	Ag	7761-88-8	*	*	*	*	*	*	Unreported	Unreported	*	*	*	*	*	*	*	*	*	*	*	*	*	*	*	*	*	*	*	*	*	*	Liquid	Artificial	*	Dark	*
374	SR	Article	Soil	Kleiven	2018	10.1002/etc.4144	Characterizing the behaviour, uptake, and toxicity of NM300K silver nanoparticles in Caenorhabditis elegans	Kleiven et al 2018. Characterizing the behaviour, uptake, and toxicity of NM300K silver nanoparticles in Caenorhabditis elegans. Environmental Toxicology and Chemistry, 37, 7, 1799-1810	AgNO3		*	Suspension	Ag	7761-88-8	*	*	*	*	*	*	Unreported	Unreported	*	*	*	*	*	*	*	*	*	*	*	*	*	*	*	*	*	*	*	*	*	*	Liquid	Artificial	*	Dark	*
375	SR	Article	Soil	Kleiven	2018	10.1002/etc.4144	Characterizing the behaviour, uptake, and toxicity of NM300K silver nanoparticles in Caenorhabditis elegans	Kleiven et al 2018. Characterizing the behaviour, uptake, and toxicity of NM300K silver nanoparticles in Caenorhabditis elegans. Environmental Toxicology and Chemistry, 37, 7, 1799-1810	AgNO3		*	Suspension	Ag	7761-88-8	*	*	*	*	*	*	Unreported	Unreported	*	*	*	*	*	*	*	*	*	*	*	*	*	*	*	*	*	*	*	*	*	*	Liquid	Artificial	*	Dark	*
376	SR	Article	Soil	Kleiven	2018	10.1002/etc.4144	Characterizing the behaviour, uptake, and toxicity of NM300K silver nanoparticles in Caenorhabditis elegans	Kleiven et al 2018. Characterizing the behaviour, uptake, and toxicity of NM300K silver nanoparticles in Caenorhabditis elegans. Environmental Toxicology and Chemistry, 37, 7, 1799-1810	AgNO3		*	Suspension	Ag	7761-88-8	*	*	*	*	*	*	Unreported	Unreported	*	*	*	*	*	*	*	*	*	*	*	*	*	*	*	*	*	*	*	*	*	*	Liquid	Artificial	*	Dark	*
377	SR	Article	Soil	Kleiven	2018	10.1002/etc.4144	Characterizing the behaviour, uptake, and toxicity of NM300K silver nanoparticles in Caenorhabditis elegans	Kleiven et al 2018. Characterizing the behaviour, uptake, and toxicity of NM300K silver nanoparticles in Caenorhabditis elegans. Environmental Toxicology and Chemistry, 37, 7, 1799-1810	AgNO3		*	Suspension	Ag	7761-88-8	*	*	*	*	*	*	Unreported	Unreported	*	*	*	*	*	*	*	*	*	*	*	*	*	*	*	*	*	*	*	*	*	*	Liquid	Artificial	*	Dark	*
378	SR	Article	Soil	Kleiven	2018	10.1002/etc.4144	Characterizing the behaviour, uptake, and toxicity of NM300K silver nanoparticles in Caenorhabditis elegans	Kleiven et al 2018. Characterizing the behaviour, uptake, and toxicity of NM300K silver nanoparticles in Caenorhabditis elegans. Environmental Toxicology and Chemistry, 37, 7, 1799-1810	AgNO3		*	Suspension	Ag	7761-88-8	*	*	*	*	*	*	Unreported	Unreported	*	*	*	*	*	*	*	*	*	*	*	*	*	*	*	*	*	*	*	*	*	*	Liquid	Artificial	*	Dark	*
379	SR	Article	Soil	Kleiven	2018	10.1002/etc.4144	Characterizing the behaviour, uptake, and toxicity of NM300K silver nanoparticles in Caenorhabditis elegans	Kleiven et al 2018. Characterizing the behaviour, uptake, and toxicity of NM300K silver nanoparticles in Caenorhabditis elegans. Environmental Toxicology and Chemistry, 37, 7, 1799-1810	AgNO3		*	Suspension	Ag	7761-88-8	*	*	*	*	*	*	Unreported	Unreported	*	*	*	*	*	*	*	*	*	*	*	*	*	*	*	*	*	*	*	*	*	*	Liquid	Artificial	*	Dark	*
380	SR	Article	Soil	Kleiven	2018	10.1002/etc.4144	Characterizing the behaviour, uptake, and toxicity of NM300K silver nanoparticles in Caenorhabditis elegans	Kleiven et al 2018. Characterizing the behaviour, uptake, and toxicity of NM300K silver nanoparticles in Caenorhabditis elegans. Environmental Toxicology and Chemistry, 37, 7, 1799-1810	AgNO3		*	Suspension	Ag	7761-88-8	*	*	*	*	*	*	Unreported	Unreported	*	*	*	*	*	*	*	*	*	*	*	*	*	*	*	*	*	*	*	*	*	*	Liquid	Artificial	*	Dark	*
381	SR	Article	Soil	Kleiven	2018	10.1002/etc.4144	Characterizing the behaviour, uptake, and toxicity of NM300K silver nanoparticles in Caenorhabditis elegans	Kleiven et al 2018. Characterizing the behaviour, uptake, and toxicity of NM300K silver nanoparticles in Caenorhabditis elegans. Environmental Toxicology and Chemistry, 37, 7, 1799-1810	AgNO3		*	Suspension	Ag	7761-88-8	*	*	*	*	*	*	Unreported	Unreported	*	*	*	*	*	*	*	*	*	*	*	*	*	*	*	*	*	*	*	*	*	*	Liquid	Artificial	*	Dark	*
382	SR	Article	Soil	Kleiven	2018	10.1002/etc.4144	Characterizing the behaviour, uptake, and toxicity of NM300K silver nanoparticles in Caenorhabditis elegans	Kleiven et al 2018. Characterizing the behaviour, uptake, and toxicity of NM300K silver nanoparticles in Caenorhabditis elegans. Environmental Toxicology and Chemistry, 37, 7, 1799-1810	AgNO3		*	Suspension	Ag	7761-88-8	*	*	*	*	*	*	Unreported	Unreported	*	*	*	*	*	*	*	*	*	*	*	*	*	*	*	*	*	*	*	*	*	*	Liquid	Artificial	*	Dark	*
383	SR	Article	Soil	Kleiven	2018	10.1002/etc.4144	Characterizing the behaviour, uptake, and toxicity of NM300K silver nanoparticles in Caenorhabditis elegans	Kleiven et al 2018. Characterizing the behaviour, uptake, and toxicity of NM300K silver nanoparticles in Caenorhabditis elegans. Environmental Toxicology and Chemistry, 37, 7, 1799-1810	AgNO3		*	Suspension	Ag	7761-88-8	*	*	*	*	*	*	Unreported	Unreported	*	*	*	*	*	*	*	*	*	*	*	*	*	*	*	*	*	*	*	*	*	*	Liquid	Artificial	*	Dark	*
384	SR	Article	Soil	Kleiven	2018	10.1002/etc.4144	Characterizing the behaviour, uptake, and toxicity of NM300K silver nanoparticles in Caenorhabditis elegans	Kleiven et al 2018. Characterizing the behaviour, uptake, and toxicity of NM300K silver nanoparticles in Caenorhabditis elegans. Environmental Toxicology and Chemistry, 37, 7, 1799-1810	AgNO3		*	Suspension	Ag	7761-88-8	*	*	*	*	*	*	Unreported	Unreported	*	*	*	*	*	*	*	*	*	*	*	*	*	*	*	*	*	*	*	*	*	*	Liquid	Artificial	*	Dark	*
385	SR	Article	Soil	Kleiven	2018	10.1002/etc.4144	Characterizing the behaviour, uptake, and toxicity of NM300K silver nanoparticles in Caenorhabditis elegans	Kleiven et al 2018. Characterizing the behaviour, uptake, and toxicity of NM300K silver nanoparticles in Caenorhabditis elegans. Environmental Toxicology and Chemistry, 37, 7, 1799-1810	AgNO3		*	Suspension	Ag	7761-88-8	*	*	*	*	*	*	Unreported	Unreported	*	*	*	*	*	*	*	*	*	*	*	*	*	*	*	*	*	*	*	*	*	*	Liquid	Artificial	*	Dark	*
386	SR	Article	Soil	Kleiven	2018	10.1002/etc.4144	Characterizing the behaviour, uptake, and toxicity of NM300K silver nanoparticles in Caenorhabditis elegans	Kleiven et al 2018. Characterizing the behaviour, uptake, and toxicity of NM300K silver nanoparticles in Caenorhabditis elegans. Environmental Toxicology and Chemistry, 37, 7, 1799-1810	AgNO3		*	Suspension	Ag	7761-88-8	*	*	*	*	*	*	Unreported	Unreported	*	*	*	*	*	*	*	*	*	*	*	*	*	*	*	*	*	*	*	*	*	*	Liquid	Artificial	*	Dark	*
387	SR	Article	Soil	Hund-Rinke	2019	10.3109/17435390.2015.1054909	Evaluation of microbrial shifts caused by a silver nanomaterial: comparison of four test systems	Hund-Rinke et al 2019. Evaluation of microbrial shifts caused by a silver nanomaterial: comparison of four test systems. Environmental Sciences Europe, 31, 86	NM300K	AgNM	JRC	Suspension	Ag	*	*	89.8	Tween	9005-70-3	8% (4% each)	*	15	Below 20	*	*	TEM	*	Spheroidal	*	*	*	*	TEM	5	*	MilliQ Water and 10.2% of Ag in suspension	Ultrasonic bath	52.31	Mean	NTA	*	*	*	*	*	Solid	Natural media	RefeSol 01A	Light	24
388	SR	Article	Soil	Hund-Rinke	2019	10.3109/17435390.2015.1054909	Evaluation of microbrial shifts caused by a silver nanomaterial: comparison of four test systems	Hund-Rinke et al 2019. Evaluation of microbrial shifts caused by a silver nanomaterial: comparison of four test systems. Environmental Sciences Europe, 31, 86	NM300K	AgNM	JRC	Suspension	Ag	*	*	89.8	Tween	9005-70-3	8% (4% each)	*	15	Below 20	*	*	TEM	*	Spheroidal	*	*	*	*	TEM	5	*	MilliQ Water and 10.2% of Ag in suspension	Ultrasonic bath	52.31	Mean	NTA	*	*	*	*	*	Solid	Natural media	RefeSol 01A	Light	24
389	SR	Article	Soil	Hund-Rinke	2019	10.3109/17435390.2015.1054909	Evaluation of microbrial shifts caused by a silver nanomaterial: comparison of four test systems	Hund-Rinke et al 2019. Evaluation of microbrial shifts caused by a silver nanomaterial: comparison of four test systems. Environmental Sciences Europe, 31, 86	NM300K	AgNM	JRC	Suspension	Ag	*	*	89.8	Tween	9005-70-3	8% (4% each)	*	15	Below 20	*	*	TEM	*	Spheroidal	*	*	*	*	TEM	5	*	MilliQ Water and 10.2% of Ag in suspension	Ultrasonic bath	52.31	Mean	NTA	*	*	*	*	*	Solid	Natural media	RefeSol 01A	Light	24
390	SR	Article	Soil	Hund-Rinke	2019	10.3109/17435390.2015.1054909	Evaluation of microbrial shifts caused by a silver nanomaterial: comparison of four test systems	Hund-Rinke et al 2019. Evaluation of microbrial shifts caused by a silver nanomaterial: comparison of four test systems. Environmental Sciences Europe, 31, 86	NM300K	AgNM	JRC	Suspension	Ag	*	*	89.8	Tween	9005-70-3	8% (4% each)	*	15	Below 20	*	*	TEM	*	Spheroidal	*	*	*	*	TEM	5	*	MilliQ Water and 10.2% of Ag in suspension	Ultrasonic bath	52.31	Mean	NTA	*	*	*	*	*	Solid	Natural media	RefeSol 01A	Light	24
391	SR	Article	Soil	Hund-Rinke	2019	10.3109/17435390.2015.1054909	Evaluation of microbrial shifts caused by a silver nanomaterial: comparison of four test systems	Hund-Rinke et al 2019. Evaluation of microbrial shifts caused by a silver nanomaterial: comparison of four test systems. Environmental Sciences Europe, 31, 86	NM300K	AgNM	JRC	Suspension	Ag	*	*	89.8	Tween	9005-70-3	8% (4% each)	*	15	Below 20	*	*	TEM	*	Spheroidal	*	*	*	*	TEM	5	*	MilliQ Water and 10.2% of Ag in suspension	Ultrasonic bath	52.31	Mean	NTA	*	*	*	*	*	Solid	Natural media	RefeSol 01A	Light	24
392	SR	Article	Soil	Hund-Rinke	2019	10.3109/17435390.2015.1054909	Evaluation of microbrial shifts caused by a silver nanomaterial: comparison of four test systems	Hund-Rinke et al 2019. Evaluation of microbrial shifts caused by a silver nanomaterial: comparison of four test systems. Environmental Sciences Europe, 31, 86	NM300K	AgNM	JRC	Suspension	Ag	*	*	89.8	Tween	9005-70-3	8% (4% each)	*	15	Below 20	*	*	TEM	*	Spheroidal	*	*	*	*	TEM	5	*	MilliQ Water and 10.2% of Ag in suspension	Ultrasonic bath	52.31	Mean	NTA	*	*	*	*	*	Solid	Natural media	RefeSol 01A	Light	24
393	SR	Article	Soil	Hund-Rinke	2019	10.3109/17435390.2015.1054909	Evaluation of microbrial shifts caused by a silver nanomaterial: comparison of four test systems	Hund-Rinke et al 2019. Evaluation of microbrial shifts caused by a silver nanomaterial: comparison of four test systems. Environmental Sciences Europe, 31, 86	NM300K	AgNM	JRC	Suspension	Ag	*	*	89.8	Tween	9005-70-3	8% (4% each)	*	15	Below 20	*	*	TEM	*	Spheroidal	*	*	*	*	TEM	5	*	MilliQ Water and 10.2% of Ag in suspension	Ultrasonic bath	52.31	Mean	NTA	*	*	*	*	*	Solid	Natural media	RefeSol 01A	Light	24
394	SR	Article	Soil	Hund-Rinke	2019	10.3109/17435390.2015.1054909	Evaluation of microbrial shifts caused by a silver nanomaterial: comparison of four test systems	Hund-Rinke et al 2019. Evaluation of microbrial shifts caused by a silver nanomaterial: comparison of four test systems. Environmental Sciences Europe, 31, 86	NM300K	AgNM	JRC	Suspension	Ag	*	*	89.8	Tween	9005-70-3	8% (4% each)	*	15	Below 20	*	*	TEM	*	Spheroidal	*	*	*	*	TEM	5	*	MilliQ Water and 10.2% of Ag in suspension	Ultrasonic bath	52.31	Mean	NTA	*	*	*	*	*	Solid	Natural media	RefeSol 01A	Light	24
395	SR	Article	Soil	Hund-Rinke	2019	10.3109/17435390.2015.1054909	Evaluation of microbrial shifts caused by a silver nanomaterial: comparison of four test systems	Hund-Rinke et al 2019. Evaluation of microbrial shifts caused by a silver nanomaterial: comparison of four test systems. Environmental Sciences Europe, 31, 86	NM300K	AgNM	JRC	Suspension	Ag	*	*	89.8	Tween	9005-70-3	8% (4% each)	*	15	Below 20	*	*	TEM	*	Spheroidal	*	*	*	*	TEM	5	*	MilliQ Water and 10.2% of Ag in suspension	Ultrasonic bath	52.31	Mean	NTA	*	*	*	*	*	Solid	Natural media	RefeSol 01A	Light	24
396	SR	Article	Soil	Hund-Rinke	2019	10.3109/17435390.2015.1054909	Evaluation of microbrial shifts caused by a silver nanomaterial: comparison of four test systems	Hund-Rinke et al 2019. Evaluation of microbrial shifts caused by a silver nanomaterial: comparison of four test systems. Environmental Sciences Europe, 31, 86	NM300K	AgNM	JRC	Suspension	Ag	*	*	89.8	Tween	9005-70-3	8% (4% each)	*	15	Below 20	*	*	TEM	*	Spheroidal	*	*	*	*	TEM	5	*	MilliQ Water and 10.2% of Ag in suspension	Ultrasonic bath	52.31	Mean	NTA	*	*	*	*	*	Solid	Natural media	RefeSol 01A	Light	24
397	SR	Article	Soil	Hund-Rinke	2019	10.3109/17435390.2015.1054909	Evaluation of microbrial shifts caused by a silver nanomaterial: comparison of four test systems	Hund-Rinke et al 2019. Evaluation of microbrial shifts caused by a silver nanomaterial: comparison of four test systems. Environmental Sciences Europe, 31, 86	NM300K	AgNM	JRC	Suspension	Ag	*	*	89.8	Tween	9005-70-3	8% (4% each)	*	15	Below 20	*	*	TEM	*	Spheroidal	*	*	*	*	TEM	5	*	MilliQ Water and 10.2% of Ag in suspension	Ultrasonic bath	52.31	Mean	NTA	*	*	*	*	*	Solid	Natural media	RefeSol 01A	Light	24
398	SR	Article	Soil	Hund-Rinke	2019	10.3109/17435390.2015.1054909	Evaluation of microbrial shifts caused by a silver nanomaterial: comparison of four test systems	Hund-Rinke et al 2019. Evaluation of microbrial shifts caused by a silver nanomaterial: comparison of four test systems. Environmental Sciences Europe, 31, 86	NM300K	AgNM	JRC	Suspension	Ag	*	*	89.8	Tween	9005-70-3	8% (4% each)	*	15	Below 20	*	*	TEM	*	Spheroidal	*	*	*	*	TEM	5	*	MilliQ Water and 10.2% of Ag in suspension	Ultrasonic bath	52.31	Mean	NTA	*	*	*	*	*	Solid	Natural media	RefeSol 01A	Light	24
399	SR	Article	Soil	Hund-Rinke	2019	10.3109/17435390.2015.1054909	Evaluation of microbrial shifts caused by a silver nanomaterial: comparison of four test systems	Hund-Rinke et al 2019. Evaluation of microbrial shifts caused by a silver nanomaterial: comparison of four test systems. Environmental Sciences Europe, 31, 86	NM300K	AgNM	JRC	Suspension	Ag	*	*	89.8	Tween	9005-70-3	8% (4% each)	*	15	Below 20	*	*	TEM	*	Spheroidal	*	*	*	*	TEM	5	*	MilliQ Water and 10.2% of Ag in suspension	Ultrasonic bath	52.31	Mean	NTA	*	*	*	*	*	Solid	Natural media	RefeSol 01A	Light	24
400	SR	Article	Soil	Hund-Rinke	2019	10.3109/17435390.2015.1054909	Evaluation of microbrial shifts caused by a silver nanomaterial: comparison of four test systems	Hund-Rinke et al 2019. Evaluation of microbrial shifts caused by a silver nanomaterial: comparison of four test systems. Environmental Sciences Europe, 31, 86	NM300K	AgNM	JRC	Suspension	Ag	*	*	89.8	Tween	9005-70-3	8% (4% each)	*	15	Below 20	*	*	TEM	*	Spheroidal	*	*	*	*	TEM	5	*	MilliQ Water and 10.2% of Ag in suspension	Ultrasonic bath	52.31	Mean	NTA	*	*	*	*	*	Solid	Natural media	RefeSol 01A	Light	24
401	SR	Article	Soil	Hund-Rinke	2019	10.3109/17435390.2015.1054909	Evaluation of microbrial shifts caused by a silver nanomaterial: comparison of four test systems	Hund-Rinke et al 2019. Evaluation of microbrial shifts caused by a silver nanomaterial: comparison of four test systems. Environmental Sciences Europe, 31, 86	NM300K	AgNM	JRC	Suspension	Ag	*	*	89.8	Tween	9005-70-3	8% (4% each)	*	15	Below 20	*	*	TEM	*	Spheroidal	*	*	*	*	TEM	5	*	MilliQ Water and 10.2% of Ag in suspension	Ultrasonic bath	52.31	Mean	NTA	*	*	*	*	*	Solid	Natural media	RefeSol 01A	Light	24
402	SR	Article	Soil	Hund-Rinke	2019	10.3109/17435390.2015.1054909	Evaluation of microbrial shifts caused by a silver nanomaterial: comparison of four test systems	Hund-Rinke et al 2019. Evaluation of microbrial shifts caused by a silver nanomaterial: comparison of four test systems. Environmental Sciences Europe, 31, 86	NM300K	AgNM	JRC	Suspension	Ag	*	*	89.8	Tween	9005-70-3	8% (4% each)	*	15	Below 20	*	*	TEM	*	Spheroidal	*	*	*	*	TEM	5	*	MilliQ Water and 10.2% of Ag in suspension	Ultrasonic bath	52.31	Mean	NTA	*	*	*	*	*	Solid	Natural media	RefeSol 01A	Light	24
403	SR	Article	Soil	Hund-Rinke	2019	10.3109/17435390.2015.1054909	Evaluation of microbrial shifts caused by a silver nanomaterial: comparison of four test systems	Hund-Rinke et al 2019. Evaluation of microbrial shifts caused by a silver nanomaterial: comparison of four test systems. Environmental Sciences Europe, 31, 86	NM300K	AgNM	JRC	Suspension	Ag	*	*	89.8	Tween	9005-70-3	8% (4% each)	*	15	Below 20	*	*	TEM	*	Spheroidal	*	*	*	*	TEM	5	*	MilliQ Water and 10.2% of Ag in suspension	Ultrasonic bath	52.31	Mean	NTA	*	*	*	*	*	Solid	Natural media	RefeSol 01A	Light	24
404	SR	Article	Soil	Hund-Rinke	2019	10.3109/17435390.2015.1054909	Evaluation of microbrial shifts caused by a silver nanomaterial: comparison of four test systems	Hund-Rinke et al 2019. Evaluation of microbrial shifts caused by a silver nanomaterial: comparison of four test systems. Environmental Sciences Europe, 31, 86	NM300K	AgNM	JRC	Suspension	Ag	*	*	89.8	Tween	9005-70-3	8% (4% each)	*	15	Below 20	*	*	TEM	*	Spheroidal	*	*	*	*	TEM	5	*	MilliQ Water and 10.2% of Ag in suspension	Ultrasonic bath	52.31	Mean	NTA	*	*	*	*	*	Solid	Natural media	RefeSol 01A	Light	24
405	SR	Article	Soil	Hund-Rinke	2019	10.3109/17435390.2015.1054909	Evaluation of microbrial shifts caused by a silver nanomaterial: comparison of four test systems	Hund-Rinke et al 2019. Evaluation of microbrial shifts caused by a silver nanomaterial: comparison of four test systems. Environmental Sciences Europe, 31, 86	NM300K	AgNM	JRC	Suspension	Ag	*	*	89.8	Tween	9005-70-3	8% (4% each)	*	15	Below 20	*	*	TEM	*	Spheroidal	*	*	*	*	TEM	5	*	MilliQ Water and 10.2% of Ag in suspension	Ultrasonic bath	52.31	Mean	NTA	*	*	*	*	*	Solid	Natural media	RefeSol 01A	Light	24
406	SR	Article	Soil	Hund-Rinke	2019	10.3109/17435390.2015.1054909	Evaluation of microbrial shifts caused by a silver nanomaterial: comparison of four test systems	Hund-Rinke et al 2019. Evaluation of microbrial shifts caused by a silver nanomaterial: comparison of four test systems. Environmental Sciences Europe, 31, 86	NM300K	AgNM	JRC	Suspension	Ag	*	*	89.8	Tween	9005-70-3	8% (4% each)	*	15	Below 20	*	*	TEM	*	Spheroidal	*	*	*	*	TEM	5	*	MilliQ Water and 10.2% of Ag in suspension	Ultrasonic bath	52.31	Mean	NTA	*	*	*	*	*	Solid	Natural media	RefeSol 01A	Light	24
407	SR	Article	Soil	Hund-Rinke	2019	10.3109/17435390.2015.1054909	Evaluation of microbrial shifts caused by a silver nanomaterial: comparison of four test systems	Hund-Rinke et al 2019. Evaluation of microbrial shifts caused by a silver nanomaterial: comparison of four test systems. Environmental Sciences Europe, 31, 86	NM300K	AgNM	JRC	Suspension	Ag	*	*	89.8	Tween	9005-70-3	8% (4% each)	*	15	Below 20	*	*	TEM	*	Spheroidal	*	*	*	*	TEM	5	*	MilliQ Water and 10.2% of Ag in suspension	Ultrasonic bath	52.31	Mean	NTA	*	*	*	*	*	Solid	Natural media	RefeSol 01A	Light	24
408	SR	Article	Soil	Hund-Rinke	2019	10.3109/17435390.2015.1054909	Evaluation of microbrial shifts caused by a silver nanomaterial: comparison of four test systems	Hund-Rinke et al 2019. Evaluation of microbrial shifts caused by a silver nanomaterial: comparison of four test systems. Environmental Sciences Europe, 31, 86	NM300K	AgNM	JRC	Suspension	Ag	*	*	89.8	Tween	9005-70-3	8% (4% each)	*	15	Below 20	*	*	TEM	*	Spheroidal	*	*	*	*	TEM	5	*	MilliQ Water and 10.2% of Ag in suspension	Ultrasonic bath	52.31	Mean	NTA	*	*	*	*	*	Solid	Natural media	RefeSol 01A	Light	24
409	SR	Article	Soil	Hund-Rinke	2019	10.3109/17435390.2015.1054909	Evaluation of microbrial shifts caused by a silver nanomaterial: comparison of four test systems	Hund-Rinke et al 2019. Evaluation of microbrial shifts caused by a silver nanomaterial: comparison of four test systems. Environmental Sciences Europe, 31, 86	NM300K	AgNM	JRC	Suspension	Ag	*	*	89.8	Tween	9005-70-3	8% (4% each)	*	15	Below 20	*	*	TEM	*	Spheroidal	*	*	*	*	TEM	5	*	MilliQ Water and 10.2% of Ag in suspension	Ultrasonic bath	52.31	Mean	NTA	*	*	*	*	*	Solid	Natural media	RefeSol 01A	Light	24
410	SR	Article	Soil	Hund-Rinke	2019	10.3109/17435390.2015.1054909	Evaluation of microbrial shifts caused by a silver nanomaterial: comparison of four test systems	Hund-Rinke et al 2019. Evaluation of microbrial shifts caused by a silver nanomaterial: comparison of four test systems. Environmental Sciences Europe, 31, 86	NM300K	AgNM	JRC	Suspension	Ag	*	*	89.8	Tween	9005-70-3	8% (4% each)	*	15	Below 20	*	*	TEM	*	Spheroidal	*	*	*	*	TEM	5	*	MilliQ Water and 10.2% of Ag in suspension	Ultrasonic bath	52.31	Mean	NTA	*	*	*	*	*	Solid	Natural media	RefeSol 01A	Light	24
411	SR	Article	Soil	Hund-Rinke	2019	10.3109/17435390.2015.1054909	Evaluation of microbrial shifts caused by a silver nanomaterial: comparison of four test systems	Hund-Rinke et al 2019. Evaluation of microbrial shifts caused by a silver nanomaterial: comparison of four test systems. Environmental Sciences Europe, 31, 86	NM300K	AgNM	JRC	Suspension	Ag	*	*	89.8	Tween	9005-70-3	8% (4% each)	*	15	Below 20	*	*	TEM	*	Spheroidal	*	*	*	*	TEM	5	*	MilliQ Water and 10.2% of Ag in suspension	Ultrasonic bath	52.31	Mean	NTA	*	*	*	*	*	Solid	Natural media	RefeSol 01A	Light	24
412	SR	Article	Soil	Hund-Rinke	2019	10.3109/17435390.2015.1054909	Evaluation of microbrial shifts caused by a silver nanomaterial: comparison of four test systems	Hund-Rinke et al 2019. Evaluation of microbrial shifts caused by a silver nanomaterial: comparison of four test systems. Environmental Sciences Europe, 31, 86	NM300K	AgNM	JRC	Suspension	Ag	*	*	89.8	Tween	9005-70-3	8% (4% each)	*	15	Below 20	*	*	TEM	*	Spheroidal	*	*	*	*	TEM	5	*	MilliQ Water and 10.2% of Ag in suspension	Ultrasonic bath	52.31	Mean	NTA	*	*	*	*	*	Solid	Natural media	RefeSol 01A	Light	24
413	SR	Article	Soil	Hund-Rinke	2019	10.3109/17435390.2015.1054909	Evaluation of microbrial shifts caused by a silver nanomaterial: comparison of four test systems	Hund-Rinke et al 2019. Evaluation of microbrial shifts caused by a silver nanomaterial: comparison of four test systems. Environmental Sciences Europe, 31, 86	NM300K	AgNM	JRC	Suspension	Ag	*	*	89.8	Tween	9005-70-3	8% (4% each)	*	15	Below 20	*	*	TEM	*	Spheroidal	*	*	*	*	TEM	5	*	MilliQ Water and 10.2% of Ag in suspension	Ultrasonic bath	52.31	Mean	NTA	*	*	*	*	*	Solid	Natural media	RefeSol 01A	Light	24
414	SR	Article	Soil	Hund-Rinke	2019	10.3109/17435390.2015.1054909	Evaluation of microbrial shifts caused by a silver nanomaterial: comparison of four test systems	Hund-Rinke et al 2019. Evaluation of microbrial shifts caused by a silver nanomaterial: comparison of four test systems. Environmental Sciences Europe, 31, 86	NM300K	AgNM	JRC	Suspension	Ag	*	*	89.8	Tween	9005-70-3	8% (4% each)	*	15	Below 20	*	*	TEM	*	Spheroidal	*	*	*	*	TEM	5	*	MilliQ Water and 10.2% of Ag in suspension	Ultrasonic bath	52.31	Mean	NTA	*	*	*	*	*	Solid	Natural media	RefeSol 01A	Light	24
415	SR	Article	Soil	Mendonça	2020	10.1016/j.envpol.2019.113484	The toxicity of silver nanomaterials (NM300K) is reduced when combined with n-acetylcysteine: hazard assessment on enchytraeus crypticus	Mendonça et al 2020. The toxicity of silver nanomaterials (NM300K) is reduced when combined with n-acetylcysteine: hazard assessment on enchytraeus crypticus. Environmental Pollution, 256, 113484	NM300K	AgNM	Applied nanoparticles	Suspension	Ag	*	*	89.8	Tween	9005-70-3	8% (4% each)	*	15	Below 20	*	20	TEM	*	Spheroidal	*	*	*	*	*	*	*	MilliQ Water and 10.2% of Ag in suspension	*	52.9	Mean	DLS	*	*	0.236	-43.3	*	Solid	Natural media	LUFA 2.2	Light	16
416	SR	Article	Soil	Mendonça	2020	10.1016/j.envpol.2019.113484	The toxicity of silver nanomaterials (NM300K) is reduced when combined with n-acetylcysteine: hazard assessment on enchytraeus crypticus	Mendonça et al 2020. The toxicity of silver nanomaterials (NM300K) is reduced when combined with n-acetylcysteine: hazard assessment on enchytraeus crypticus. Environmental Pollution, 256, 113484	NM300K	AgNM	Applied nanoparticles	Suspension	Ag	*	*	89.8	Tween	9005-70-3	8% (4% each)	*	15	Below 20	*	20	TEM	*	Spheroidal	*	*	*	*	*	*	*	MilliQ Water and 10.2% of Ag in suspension	*	52.9	Mean	DLS	*	*	0.236	-43.3	*	Solid	Natural media	LUFA 2.2	Light	16
417	SR	Article	Soil	Mendonça	2020	10.1016/j.envpol.2019.113484	The toxicity of silver nanomaterials (NM300K) is reduced when combined with n-acetylcysteine: hazard assessment on enchytraeus crypticus	Mendonça et al 2020. The toxicity of silver nanomaterials (NM300K) is reduced when combined with n-acetylcysteine: hazard assessment on enchytraeus crypticus. Environmental Pollution, 256, 113484	NM300K	AgNM	Applied nanoparticles	Suspension	Ag	*	*	89.8	Tween	9005-70-3	8% (4% each)	*	15	Below 20	*	20	TEM	*	Spheroidal	*	*	*	*	*	*	*	MilliQ Water and 10.2% of Ag in suspension	*	52.9	Mean	DLS	*	*	0.236	-43.3	*	Solid	Natural media	LUFA 2.2	Light	16
418	SR	Article	Soil	Mendonça	2020	10.1016/j.envpol.2019.113484	The toxicity of silver nanomaterials (NM300K) is reduced when combined with n-acetylcysteine: hazard assessment on enchytraeus crypticus	Mendonça et al 2020. The toxicity of silver nanomaterials (NM300K) is reduced when combined with n-acetylcysteine: hazard assessment on enchytraeus crypticus. Environmental Pollution, 256, 113484	NM300K	AgNM	Applied nanoparticles	Suspension	Ag	*	*	89.8	Tween	9005-70-3	8% (4% each)	*	15	Below 20	*	20	TEM	*	Spheroidal	*	*	*	*	*	*	*	MilliQ Water and 10.2% of Ag in suspension	*	52.9	Mean	DLS	*	*	0.236	-43.3	*	Solid	Natural media	LUFA 2.2	Light	16
419	SR	Article	Soil	Mendonça	2020	10.1016/j.envpol.2019.113484	The toxicity of silver nanomaterials (NM300K) is reduced when combined with n-acetylcysteine: hazard assessment on enchytraeus crypticus	Mendonça et al 2020. The toxicity of silver nanomaterials (NM300K) is reduced when combined with n-acetylcysteine: hazard assessment on enchytraeus crypticus. Environmental Pollution, 256, 113484	AgNO3		Sigma-Aldrich	*	Ag	7761-88-8	*	*	*	*	*	*	Unreported	Unreported	*	*	*	*	*	*	*	*	*	*	*	*	*	*	*	*	*	*	*	*	*	*	Solid	Natural media	LUFA 2.2	Light	16
420	SR	Article	Soil	Mendonça	2020	10.1016/j.envpol.2019.113484	The toxicity of silver nanomaterials (NM300K) is reduced when combined with n-acetylcysteine: hazard assessment on enchytraeus crypticus	Mendonça et al 2020. The toxicity of silver nanomaterials (NM300K) is reduced when combined with n-acetylcysteine: hazard assessment on enchytraeus crypticus. Environmental Pollution, 256, 113484	AgNO3		Sigma-Aldrich	*	Ag	7761-88-8	*	*	*	*	*	*	Unreported	Unreported	*	*	*	*	*	*	*	*	*	*	*	*	*	*	*	*	*	*	*	*	*	*	Solid	Natural media	LUFA 2.2	Light	16
421	SR	Article	Soil	Mendonça	2020	10.1016/j.envpol.2019.113484	The toxicity of silver nanomaterials (NM300K) is reduced when combined with n-acetylcysteine: hazard assessment on enchytraeus crypticus	Mendonça et al 2020. The toxicity of silver nanomaterials (NM300K) is reduced when combined with n-acetylcysteine: hazard assessment on enchytraeus crypticus. Environmental Pollution, 256, 113484	AgNO3		Sigma-Aldrich	*	Ag	7761-88-8	*	*	*	*	*	*	Unreported	Unreported	*	*	*	*	*	*	*	*	*	*	*	*	*	*	*	*	*	*	*	*	*	*	Solid	Natural media	LUFA 2.2	Light	16
422	SR	Article	Soil	Mendonça	2020	10.1016/j.envpol.2019.113484	The toxicity of silver nanomaterials (NM300K) is reduced when combined with n-acetylcysteine: hazard assessment on enchytraeus crypticus	Mendonça et al 2020. The toxicity of silver nanomaterials (NM300K) is reduced when combined with n-acetylcysteine: hazard assessment on enchytraeus crypticus. Environmental Pollution, 256, 113484	AgNO3		Sigma-Aldrich	*	Ag	7761-88-8	*	*	*	*	*	*	Unreported	Unreported	*	*	*	*	*	*	*	*	*	*	*	*	*	*	*	*	*	*	*	*	*	*	Solid	Natural media	LUFA 2.2	Light	16
423	SR	Article	Soil	Mendonça	2020	10.1016/j.envpol.2019.113484	The toxicity of silver nanomaterials (NM300K) is reduced when combined with n-acetylcysteine: hazard assessment on enchytraeus crypticus	Mendonça et al 2020. The toxicity of silver nanomaterials (NM300K) is reduced when combined with n-acetylcysteine: hazard assessment on enchytraeus crypticus. Environmental Pollution, 256, 113484	NM300K	AgNM	Applied nanoparticles	Suspension	Ag	*	*	89.8	Tween	9005-70-3	8% (4% each)	*	15	Below 20	*	20	TEM	*	Spheroidal	*	*	*	*	*	*	*	MilliQ Water and 10.2% of Ag in suspension	*	52.9	Mean	DLS	*	*	0.236	-43.3	*	Solid	Natural media	LUFA 2.2	Light	16
424	SR	Article	Soil	Mendonça	2020	10.1016/j.envpol.2019.113484	The toxicity of silver nanomaterials (NM300K) is reduced when combined with n-acetylcysteine: hazard assessment on enchytraeus crypticus	Mendonça et al 2020. The toxicity of silver nanomaterials (NM300K) is reduced when combined with n-acetylcysteine: hazard assessment on enchytraeus crypticus. Environmental Pollution, 256, 113484	NM300K	AgNM	Applied nanoparticles	Suspension	Ag	*	*	89.8	Tween	9005-70-3	8% (4% each)	*	15	Below 20	*	20	TEM	*	Spheroidal	*	*	*	*	*	*	*	MilliQ Water and 10.2% of Ag in suspension	*	52.9	Mean	DLS	*	*	0.236	-43.3	*	Solid	Natural media	LUFA 2.2	Light	16
425	SR	Article	Soil	Mendonça	2020	10.1016/j.envpol.2019.113484	The toxicity of silver nanomaterials (NM300K) is reduced when combined with n-acetylcysteine: hazard assessment on enchytraeus crypticus	Mendonça et al 2020. The toxicity of silver nanomaterials (NM300K) is reduced when combined with n-acetylcysteine: hazard assessment on enchytraeus crypticus. Environmental Pollution, 256, 113484	NM300K	AgNM	Applied nanoparticles	Suspension	Ag	*	*	89.8	Tween	9005-70-3	8% (4% each)	*	15	Below 20	*	20	TEM	*	Spheroidal	*	*	*	*	*	*	*	MilliQ Water and 10.2% of Ag in suspension	*	52.9	Mean	DLS	*	*	0.236	-43.3	*	Solid	Natural media	LUFA 2.2	Light	16
426	SR	Article	Soil	Mendonça	2020	10.1016/j.envpol.2019.113484	The toxicity of silver nanomaterials (NM300K) is reduced when combined with n-acetylcysteine: hazard assessment on enchytraeus crypticus	Mendonça et al 2020. The toxicity of silver nanomaterials (NM300K) is reduced when combined with n-acetylcysteine: hazard assessment on enchytraeus crypticus. Environmental Pollution, 256, 113484	NM300K	AgNM	Applied nanoparticles	Suspension	Ag	*	*	89.8	Tween	9005-70-3	8% (4% each)	*	15	Below 20	*	20	TEM	*	Spheroidal	*	*	*	*	*	*	*	MilliQ Water and 10.2% of Ag in suspension	*	52.9	Mean	DLS	*	*	0.236	-43.3	*	Solid	Natural media	LUFA 2.2	Light	16
427	SR	Article	Soil	Mendonça	2020	10.1016/j.envpol.2019.113484	The toxicity of silver nanomaterials (NM300K) is reduced when combined with n-acetylcysteine: hazard assessment on enchytraeus crypticus	Mendonça et al 2020. The toxicity of silver nanomaterials (NM300K) is reduced when combined with n-acetylcysteine: hazard assessment on enchytraeus crypticus. Environmental Pollution, 256, 113484	AgNO3		Sigma-Aldrich	*	Ag	7761-88-8	*	*	*	*	*	*	Unreported	Unreported	*	*	*	*	*	*	*	*	*	*	*	*	*	*	*	*	*	*	*	*	*	*	Solid	Natural media	LUFA 2.2	Light	16
428	SR	Article	Soil	Mendonça	2020	10.1016/j.envpol.2019.113484	The toxicity of silver nanomaterials (NM300K) is reduced when combined with n-acetylcysteine: hazard assessment on enchytraeus crypticus	Mendonça et al 2020. The toxicity of silver nanomaterials (NM300K) is reduced when combined with n-acetylcysteine: hazard assessment on enchytraeus crypticus. Environmental Pollution, 256, 113484	AgNO3		Sigma-Aldrich	*	Ag	7761-88-8	*	*	*	*	*	*	Unreported	Unreported	*	*	*	*	*	*	*	*	*	*	*	*	*	*	*	*	*	*	*	*	*	*	Solid	Natural media	LUFA 2.2	Light	16
429	SR	Article	Soil	Mendonça	2020	10.1016/j.envpol.2019.113484	The toxicity of silver nanomaterials (NM300K) is reduced when combined with n-acetylcysteine: hazard assessment on enchytraeus crypticus	Mendonça et al 2020. The toxicity of silver nanomaterials (NM300K) is reduced when combined with n-acetylcysteine: hazard assessment on enchytraeus crypticus. Environmental Pollution, 256, 113484	AgNO3		Sigma-Aldrich	*	Ag	7761-88-8	*	*	*	*	*	*	Unreported	Unreported	*	*	*	*	*	*	*	*	*	*	*	*	*	*	*	*	*	*	*	*	*	*	Solid	Natural media	LUFA 2.2	Light	16
430	SR	Article	Soil	Mendonça	2020	10.1016/j.envpol.2019.113484	The toxicity of silver nanomaterials (NM300K) is reduced when combined with n-acetylcysteine: hazard assessment on enchytraeus crypticus	Mendonça et al 2020. The toxicity of silver nanomaterials (NM300K) is reduced when combined with n-acetylcysteine: hazard assessment on enchytraeus crypticus. Environmental Pollution, 256, 113484	AgNO3		Sigma-Aldrich	*	Ag	7761-88-8	*	*	*	*	*	*	Unreported	Unreported	*	*	*	*	*	*	*	*	*	*	*	*	*	*	*	*	*	*	*	*	*	*	Solid	Natural media	LUFA 2.2	Light	16
431	SR	Article	Soil	McKee	2018	10.3390/ijerph15040652	Is a water content of 60% maximum water holding capacity suitable for folsomia candida reproduction tests? a study with silver nanoparticles and AgNO3	McKee et al 2018 Is a water content of 60% maximum water holding capacity suitable for folsomia candida reproduction tests? a study with silver nanoparticles and AgNO3. International Journal of Environmental Research and Public Health, 15, 652	AgNO3		Sigma-Aldrich	Powder	Ag	7761-88-8	*	1	*	*	*	*	Unreported	Unreported	*	*	*	*	*	*	*	*	*	*	*	*	*	*	*	*	*	*	*	*	*	*	Solid	Artificial	OECD soil	Light	12
432	SR	Article	Soil	Rossbach	2020	10.1016/j.scitotenv.2020.137665	In vivo assessment of silver nanoparticle induced reactive oxygen species reveals tissue specific effects on cellular redox status in the nematode caenorhabditis elegans	Rossbach et al 2020. In vivo assessment of silver nanoparticle induced reactive oxygen species reveals tissue specific effects on cellular redox status in the nematode caenorhabditis elegans. STOTEN, 721, 137665	AgNO3		*	*	Ag	7761-88-8	*	*	*	*	*	*	Unreported	Unreported	*	*	*	*	*	*	*	*	*	*	*	*	*	*	*	*	*	*	*	*	*	*	Liquid	Artificial	*	Dark	*
433	SR	Article	Soil	Rossbach	2020	10.1016/j.scitotenv.2020.137665	In vivo assessment of silver nanoparticle induced reactive oxygen species reveals tissue specific effects on cellular redox status in the nematode caenorhabditis elegans	Rossbach et al 2020. In vivo assessment of silver nanoparticle induced reactive oxygen species reveals tissue specific effects on cellular redox status in the nematode caenorhabditis elegans. STOTEN, 721, 137665	AgNO3		*	*	Ag	7761-88-8	*	*	*	*	*	*	Unreported	Unreported	*	*	*	*	*	*	*	*	*	*	*	*	*	*	*	*	*	*	*	*	*	*	Liquid	Artificial	*	Dark	*
434	SR	Article	Soil	Rossbach	2020	10.1016/j.scitotenv.2020.137665	In vivo assessment of silver nanoparticle induced reactive oxygen species reveals tissue specific effects on cellular redox status in the nematode caenorhabditis elegans	Rossbach et al 2020. In vivo assessment of silver nanoparticle induced reactive oxygen species reveals tissue specific effects on cellular redox status in the nematode caenorhabditis elegans. STOTEN, 721, 137665	AgNO3		*	*	Ag	7761-88-8	*	*	*	*	*	*	Unreported	Unreported	*	*	*	*	*	*	*	*	*	*	*	*	*	*	*	*	*	*	*	*	*	*	Liquid	Artificial	*	Dark	*
435	SR	Article	Soil	Rossbach	2020	10.1016/j.scitotenv.2020.137665	In vivo assessment of silver nanoparticle induced reactive oxygen species reveals tissue specific effects on cellular redox status in the nematode caenorhabditis elegans	Rossbach et al 2020. In vivo assessment of silver nanoparticle induced reactive oxygen species reveals tissue specific effects on cellular redox status in the nematode caenorhabditis elegans. STOTEN, 721, 137665	AgNO3		*	*	Ag	7761-88-8	*	*	*	*	*	*	Unreported	Unreported	*	*	*	*	*	*	*	*	*	*	*	*	*	*	*	*	*	*	*	*	*	*	Liquid	Artificial	*	Dark	*
436	SR	Article	Soil	Rossbach	2020	10.1016/j.scitotenv.2020.137665	In vivo assessment of silver nanoparticle induced reactive oxygen species reveals tissue specific effects on cellular redox status in the nematode caenorhabditis elegans	Rossbach et al 2020. In vivo assessment of silver nanoparticle induced reactive oxygen species reveals tissue specific effects on cellular redox status in the nematode caenorhabditis elegans. STOTEN, 721, 137665	AgNO3		*	*	Ag	7761-88-8	*	*	*	*	*	*	Unreported	Unreported	*	*	*	*	*	*	*	*	*	*	*	*	*	*	*	*	*	*	*	*	*	*	Liquid	Artificial	*	Dark	*
437	SR	Article	Soil	Rossbach	2020	10.1016/j.scitotenv.2020.137665	In vivo assessment of silver nanoparticle induced reactive oxygen species reveals tissue specific effects on cellular redox status in the nematode caenorhabditis elegans	Rossbach et al 2020. In vivo assessment of silver nanoparticle induced reactive oxygen species reveals tissue specific effects on cellular redox status in the nematode caenorhabditis elegans. STOTEN, 721, 137665	AgNO3		*	*	Ag	7761-88-8	*	*	*	*	*	*	Unreported	Unreported	*	*	*	*	*	*	*	*	*	*	*	*	*	*	*	*	*	*	*	*	*	*	Liquid	Artificial	*	Dark	*
438	SR	Article	Soil	Rossbach	2020	10.1016/j.scitotenv.2020.137665	In vivo assessment of silver nanoparticle induced reactive oxygen species reveals tissue specific effects on cellular redox status in the nematode caenorhabditis elegans	Rossbach et al 2020. In vivo assessment of silver nanoparticle induced reactive oxygen species reveals tissue specific effects on cellular redox status in the nematode caenorhabditis elegans. STOTEN, 721, 137665	NM300K	AgNM	JRC	Suspension	Ag	*	*	89.8	Tween	9005-70-3	8% (4% each)	*	15	Below 20	*	*	TEM	*	Spheroidal	*	*	*	23.2	TEM	*	*	MilliQ Water and 10.2% of Ag in suspension	For 13 mins, probe sonicator	93.3	Mean	DLS	*	*	0.3	-8.77	*	Liquid	Artificial	*	Dark	*
439	SR	Article	Soil	Rossbach	2020	10.1016/j.scitotenv.2020.137665	In vivo assessment of silver nanoparticle induced reactive oxygen species reveals tissue specific effects on cellular redox status in the nematode caenorhabditis elegans	Rossbach et al 2020. In vivo assessment of silver nanoparticle induced reactive oxygen species reveals tissue specific effects on cellular redox status in the nematode caenorhabditis elegans. STOTEN, 721, 137665	NM300K	AgNM	JRC	Suspension	Ag	*	*	89.8	Tween	9005-70-3	8% (4% each)	*	15	Below 20	*	*	TEM	*	Spheroidal	*	*	*	23.2	TEM	*	*	MilliQ Water and 10.2% of Ag in suspension	For 13 mins, probe sonicator	93.3	Mean	DLS	*	*	0.3	-8.77	*	Liquid	Artificial	*	Dark	*
440	SR	Article	Soil	Rossbach	2020	10.1016/j.scitotenv.2020.137665	In vivo assessment of silver nanoparticle induced reactive oxygen species reveals tissue specific effects on cellular redox status in the nematode caenorhabditis elegans	Rossbach et al 2020. In vivo assessment of silver nanoparticle induced reactive oxygen species reveals tissue specific effects on cellular redox status in the nematode caenorhabditis elegans. STOTEN, 721, 137665	NM300K	AgNM	JRC	Suspension	Ag	*	*	89.8	Tween	9005-70-3	8% (4% each)	*	15	Below 20	*	*	TEM	*	Spheroidal	*	*	*	23.2	TEM	*	*	MilliQ Water and 10.2% of Ag in suspension	For 13 mins, probe sonicator	93.3	Mean	DLS	*	*	0.3	-8.77	*	Liquid	Artificial	*	Dark	*
441	SR	Article	Soil	Rossbach	2020	10.1016/j.scitotenv.2020.137665	In vivo assessment of silver nanoparticle induced reactive oxygen species reveals tissue specific effects on cellular redox status in the nematode caenorhabditis elegans	Rossbach et al 2020. In vivo assessment of silver nanoparticle induced reactive oxygen species reveals tissue specific effects on cellular redox status in the nematode caenorhabditis elegans. STOTEN, 721, 137665	NM300K	AgNM	JRC	Suspension	Ag	*	*	89.8	Tween	9005-70-3	8% (4% each)	*	15	Below 20	*	*	TEM	*	Spheroidal	*	*	*	23.2	TEM	*	*	MilliQ Water and 10.2% of Ag in suspension	For 13 mins, probe sonicator	93.3	Mean	DLS	*	*	0.3	-8.77	*	Liquid	Artificial	*	Dark	*
442	SR	Article	Soil	Rossbach	2020	10.1016/j.scitotenv.2020.137665	In vivo assessment of silver nanoparticle induced reactive oxygen species reveals tissue specific effects on cellular redox status in the nematode caenorhabditis elegans	Rossbach et al 2020. In vivo assessment of silver nanoparticle induced reactive oxygen species reveals tissue specific effects on cellular redox status in the nematode caenorhabditis elegans. STOTEN, 721, 137665	NM300K	AgNM	JRC	Suspension	Ag	*	*	89.8	Tween	9005-70-3	8% (4% each)	*	15	Below 20	*	*	TEM	*	Spheroidal	*	*	*	23.2	TEM	*	*	MilliQ Water and 10.2% of Ag in suspension	For 13 mins, probe sonicator	93.3	Mean	DLS	*	*	0.3	-8.77	*	Liquid	Artificial	*	Dark	*
443	SR	Article	Soil	Rossbach	2020	10.1016/j.scitotenv.2020.137665	In vivo assessment of silver nanoparticle induced reactive oxygen species reveals tissue specific effects on cellular redox status in the nematode caenorhabditis elegans	Rossbach et al 2020. In vivo assessment of silver nanoparticle induced reactive oxygen species reveals tissue specific effects on cellular redox status in the nematode caenorhabditis elegans. STOTEN, 721, 137665	NM300K	AgNM	JRC	Suspension	Ag	*	*	89.8	Tween	9005-70-3	8% (4% each)	*	15	Below 20	*	*	TEM	*	Spheroidal	*	*	*	23.2	TEM	*	*	MilliQ Water and 10.2% of Ag in suspension	For 13 mins, probe sonicator	93.3	Mean	DLS	*	*	0.3	-8.77	*	Liquid	Artificial	*	Dark	*
444	SR	Article	Soil	Ribeiro	2015	10.3390/ijerph120809589	Oxidative stress mechanisms caused by Ag nanoparticles (NM300K) are difference from those of AgNO3: effects in the soil invertebrate enchytraeus crypticus	Ribeiro et al 2015. xidative stress mechanisms caused by Ag nanoparticles (NM300K) are difference from those of AgNO3: effects in the soil invertebrate enchytraeus. Int. J. Environ. Res. Public Health, 12, 9589-9602	AgNO3		Sigma-Aldrich	*	Ag	7761-88-8	*	0.1	*	*	*	*	Unreported	Unreported	*	*	*	*	*	*	*	*	*	*	*	*	*	*	*	*	*	*	*	*	*	*	Solid	Natural media	LUFA 2.2	Light	16
445	SR	Article	Soil	Ribeiro	2015	10.3390/ijerph120809589	Oxidative stress mechanisms caused by Ag nanoparticles (NM300K) are difference from those of AgNO3: effects in the soil invertebrate enchytraeus crypticus	Ribeiro et al 2015. xidative stress mechanisms caused by Ag nanoparticles (NM300K) are difference from those of AgNO3: effects in the soil invertebrate enchytraeus. Int. J. Environ. Res. Public Health, 12, 9589-9602	AgNO3		Sigma-Aldrich	*	Ag	7761-88-8	*	0.1	*	*	*	*	Unreported	Unreported	*	*	*	*	*	*	*	*	*	*	*	*	*	*	*	*	*	*	*	*	*	*	Solid	Natural media	LUFA 2.2	Light	16
446	SR	Article	Soil	Ribeiro	2015	10.3390/ijerph120809589	Oxidative stress mechanisms caused by Ag nanoparticles (NM300K) are difference from those of AgNO3: effects in the soil invertebrate enchytraeus crypticus	Ribeiro et al 2015. xidative stress mechanisms caused by Ag nanoparticles (NM300K) are difference from those of AgNO3: effects in the soil invertebrate enchytraeus. Int. J. Environ. Res. Public Health, 12, 9589-9602	AgNO3		Sigma-Aldrich	*	Ag	7761-88-8	*	0.1	*	*	*	*	Unreported	Unreported	*	*	*	*	*	*	*	*	*	*	*	*	*	*	*	*	*	*	*	*	*	*	Solid	Natural media	LUFA 2.2	Light	16
447	SR	Article	Soil	Ribeiro	2015	10.3390/ijerph120809589	Oxidative stress mechanisms caused by Ag nanoparticles (NM300K) are difference from those of AgNO3: effects in the soil invertebrate enchytraeus crypticus	Ribeiro et al 2015. xidative stress mechanisms caused by Ag nanoparticles (NM300K) are difference from those of AgNO3: effects in the soil invertebrate enchytraeus. Int. J. Environ. Res. Public Health, 12, 9589-9602	AgNO3		Sigma-Aldrich	*	Ag	7761-88-8	*	0.1	*	*	*	*	Unreported	Unreported	*	*	*	*	*	*	*	*	*	*	*	*	*	*	*	*	*	*	*	*	*	*	Solid	Natural media	LUFA 2.2	Light	16
448	SR	Article	Soil	Ribeiro	2015	10.3390/ijerph120809589	Oxidative stress mechanisms caused by Ag nanoparticles (NM300K) are difference from those of AgNO3: effects in the soil invertebrate enchytraeus crypticus	Ribeiro et al 2015. xidative stress mechanisms caused by Ag nanoparticles (NM300K) are difference from those of AgNO3: effects in the soil invertebrate enchytraeus. Int. J. Environ. Res. Public Health, 12, 9589-9602	AgNO3		Sigma-Aldrich	*	Ag	7761-88-8	*	0.1	*	*	*	*	Unreported	Unreported	*	*	*	*	*	*	*	*	*	*	*	*	*	*	*	*	*	*	*	*	*	*	Solid	Natural media	LUFA 2.2	Light	16
449	SR	Article	Soil	Ribeiro	2015	10.3390/ijerph120809589	Oxidative stress mechanisms caused by Ag nanoparticles (NM300K) are difference from those of AgNO3: effects in the soil invertebrate enchytraeus crypticus	Ribeiro et al 2015. xidative stress mechanisms caused by Ag nanoparticles (NM300K) are difference from those of AgNO3: effects in the soil invertebrate enchytraeus. Int. J. Environ. Res. Public Health, 12, 9589-9602	AgNO3		Sigma-Aldrich	*	Ag	7761-88-8	*	0.1	*	*	*	*	Unreported	Unreported	*	*	*	*	*	*	*	*	*	*	*	*	*	*	*	*	*	*	*	*	*	*	Solid	Natural media	LUFA 2.2	Light	16
450	SR	Article	Soil	Ribeiro	2015	10.3390/ijerph120809589	Oxidative stress mechanisms caused by Ag nanoparticles (NM300K) are difference from those of AgNO3: effects in the soil invertebrate enchytraeus crypticus	Ribeiro et al 2015. xidative stress mechanisms caused by Ag nanoparticles (NM300K) are difference from those of AgNO3: effects in the soil invertebrate enchytraeus. Int. J. Environ. Res. Public Health, 12, 9589-9602	AgNO3		Sigma-Aldrich	*	Ag	7761-88-8	*	0.1	*	*	*	*	Unreported	Unreported	*	*	*	*	*	*	*	*	*	*	*	*	*	*	*	*	*	*	*	*	*	*	Solid	Natural media	LUFA 2.2	Light	16
451	SR	Article	Soil	Ribeiro	2015	10.3390/ijerph120809589	Oxidative stress mechanisms caused by Ag nanoparticles (NM300K) are difference from those of AgNO3: effects in the soil invertebrate enchytraeus crypticus	Ribeiro et al 2015. xidative stress mechanisms caused by Ag nanoparticles (NM300K) are difference from those of AgNO3: effects in the soil invertebrate enchytraeus. Int. J. Environ. Res. Public Health, 12, 9589-9602	AgNO3		Sigma-Aldrich	*	Ag	7761-88-8	*	0.1	*	*	*	*	Unreported	Unreported	*	*	*	*	*	*	*	*	*	*	*	*	*	*	*	*	*	*	*	*	*	*	Solid	Natural media	LUFA 2.2	Light	16
452	SR	Article	Soil	Ribeiro	2015	10.3390/ijerph120809589	Oxidative stress mechanisms caused by Ag nanoparticles (NM300K) are difference from those of AgNO3: effects in the soil invertebrate enchytraeus crypticus	Ribeiro et al 2015. xidative stress mechanisms caused by Ag nanoparticles (NM300K) are difference from those of AgNO3: effects in the soil invertebrate enchytraeus. Int. J. Environ. Res. Public Health, 12, 9589-9602	AgNO3		Sigma-Aldrich	*	Ag	7761-88-8	*	0.1	*	*	*	*	Unreported	Unreported	*	*	*	*	*	*	*	*	*	*	*	*	*	*	*	*	*	*	*	*	*	*	Solid	Natural media	LUFA 2.2	Light	16
453	SR	Article	Soil	Ribeiro	2015	10.3390/ijerph120809589	Oxidative stress mechanisms caused by Ag nanoparticles (NM300K) are difference from those of AgNO3: effects in the soil invertebrate enchytraeus crypticus	Ribeiro et al 2015. xidative stress mechanisms caused by Ag nanoparticles (NM300K) are difference from those of AgNO3: effects in the soil invertebrate enchytraeus. Int. J. Environ. Res. Public Health, 12, 9589-9602	AgNO3		Sigma-Aldrich	*	Ag	7761-88-8	*	0.1	*	*	*	*	Unreported	Unreported	*	*	*	*	*	*	*	*	*	*	*	*	*	*	*	*	*	*	*	*	*	*	Solid	Natural media	LUFA 2.2	Light	16
454	SR	Article	Soil	Ribeiro	2015	10.3390/ijerph120809589	Oxidative stress mechanisms caused by Ag nanoparticles (NM300K) are difference from those of AgNO3: effects in the soil invertebrate enchytraeus crypticus	Ribeiro et al 2015. xidative stress mechanisms caused by Ag nanoparticles (NM300K) are difference from those of AgNO3: effects in the soil invertebrate enchytraeus. Int. J. Environ. Res. Public Health, 12, 9589-9602	AgNO3		Sigma-Aldrich	*	Ag	7761-88-8	*	0.1	*	*	*	*	Unreported	Unreported	*	*	*	*	*	*	*	*	*	*	*	*	*	*	*	*	*	*	*	*	*	*	Solid	Natural media	LUFA 2.2	Light	16
455	SR	Article	Soil	Ribeiro	2015	10.3390/ijerph120809589	Oxidative stress mechanisms caused by Ag nanoparticles (NM300K) are difference from those of AgNO3: effects in the soil invertebrate enchytraeus crypticus	Ribeiro et al 2015. xidative stress mechanisms caused by Ag nanoparticles (NM300K) are difference from those of AgNO3: effects in the soil invertebrate enchytraeus. Int. J. Environ. Res. Public Health, 12, 9589-9602	AgNO3		Sigma-Aldrich	*	Ag	7761-88-8	*	0.1	*	*	*	*	Unreported	Unreported	*	*	*	*	*	*	*	*	*	*	*	*	*	*	*	*	*	*	*	*	*	*	Solid	Natural media	LUFA 2.2	Light	16
456	SR	Article	Soil	Ribeiro	2015	10.3390/ijerph120809589	Oxidative stress mechanisms caused by Ag nanoparticles (NM300K) are difference from those of AgNO3: effects in the soil invertebrate enchytraeus crypticus	Ribeiro et al 2015. xidative stress mechanisms caused by Ag nanoparticles (NM300K) are difference from those of AgNO3: effects in the soil invertebrate enchytraeus. Int. J. Environ. Res. Public Health, 12, 9589-9602	AgNO3		Sigma-Aldrich	*	Ag	7761-88-8	*	0.1	*	*	*	*	Unreported	Unreported	*	*	*	*	*	*	*	*	*	*	*	*	*	*	*	*	*	*	*	*	*	*	Solid	Natural media	LUFA 2.2	Light	16
457	SR	Article	Soil	Ribeiro	2015	10.3390/ijerph120809589	Oxidative stress mechanisms caused by Ag nanoparticles (NM300K) are difference from those of AgNO3: effects in the soil invertebrate enchytraeus crypticus	Ribeiro et al 2015. xidative stress mechanisms caused by Ag nanoparticles (NM300K) are difference from those of AgNO3: effects in the soil invertebrate enchytraeus. Int. J. Environ. Res. Public Health, 12, 9589-9602	AgNO3		Sigma-Aldrich	*	Ag	7761-88-8	*	0.1	*	*	*	*	Unreported	Unreported	*	*	*	*	*	*	*	*	*	*	*	*	*	*	*	*	*	*	*	*	*	*	Solid	Natural media	LUFA 2.2	Light	16
458	SR	Article	Soil	Ribeiro	2015	10.3390/ijerph120809589	Oxidative stress mechanisms caused by Ag nanoparticles (NM300K) are difference from those of AgNO3: effects in the soil invertebrate enchytraeus crypticus	Ribeiro et al 2015. xidative stress mechanisms caused by Ag nanoparticles (NM300K) are difference from those of AgNO3: effects in the soil invertebrate enchytraeus. Int. J. Environ. Res. Public Health, 12, 9589-9602	NM300K	AgNM	JRC	Suspension	Ag	*	*	89.8	Tween	9005-70-3	8% (4% each)	*	17	Below 20	*	*	TEM	*	Spheroidal	*	*	*	*	*	*	*	MilliQ Water and 10.2% of Ag in suspension	*	52.31	Mean	NTA	*	*	*	*	*	Solid	Natural media	LUFA 2.2	Light	16
459	SR	Article	Soil	Ribeiro	2015	10.3390/ijerph120809589	Oxidative stress mechanisms caused by Ag nanoparticles (NM300K) are difference from those of AgNO3: effects in the soil invertebrate enchytraeus crypticus	Ribeiro et al 2015. xidative stress mechanisms caused by Ag nanoparticles (NM300K) are difference from those of AgNO3: effects in the soil invertebrate enchytraeus. Int. J. Environ. Res. Public Health, 12, 9589-9602	NM300K	AgNM	JRC	Suspension	Ag	*	*	89.8	Tween	9005-70-3	8% (4% each)	*	17	Below 20	*	*	TEM	*	Spheroidal	*	*	*	*	*	*	*	MilliQ Water and 10.2% of Ag in suspension	*	52.31	Mean	NTA	*	*	*	*	*	Solid	Natural media	LUFA 2.2	Light	16
460	SR	Article	Soil	Ribeiro	2015	10.3390/ijerph120809589	Oxidative stress mechanisms caused by Ag nanoparticles (NM300K) are difference from those of AgNO3: effects in the soil invertebrate enchytraeus crypticus	Ribeiro et al 2015. xidative stress mechanisms caused by Ag nanoparticles (NM300K) are difference from those of AgNO3: effects in the soil invertebrate enchytraeus. Int. J. Environ. Res. Public Health, 12, 9589-9602	NM300K	AgNM	JRC	Suspension	Ag	*	*	89.8	Tween	9005-70-3	8% (4% each)	*	17	Below 20	*	*	TEM	*	Spheroidal	*	*	*	*	*	*	*	MilliQ Water and 10.2% of Ag in suspension	*	52.31	Mean	NTA	*	*	*	*	*	Solid	Natural media	LUFA 2.2	Light	16
461	SR	Article	Soil	Ribeiro	2015	10.3390/ijerph120809589	Oxidative stress mechanisms caused by Ag nanoparticles (NM300K) are difference from those of AgNO3: effects in the soil invertebrate enchytraeus crypticus	Ribeiro et al 2015. xidative stress mechanisms caused by Ag nanoparticles (NM300K) are difference from those of AgNO3: effects in the soil invertebrate enchytraeus. Int. J. Environ. Res. Public Health, 12, 9589-9602	NM300K	AgNM	JRC	Suspension	Ag	*	*	89.8	Tween	9005-70-3	8% (4% each)	*	17	Below 20	*	*	TEM	*	Spheroidal	*	*	*	*	*	*	*	MilliQ Water and 10.2% of Ag in suspension	*	52.31	Mean	NTA	*	*	*	*	*	Solid	Natural media	LUFA 2.2	Light	16
462	SR	Article	Soil	Ribeiro	2015	10.3390/ijerph120809589	Oxidative stress mechanisms caused by Ag nanoparticles (NM300K) are difference from those of AgNO3: effects in the soil invertebrate enchytraeus crypticus	Ribeiro et al 2015. xidative stress mechanisms caused by Ag nanoparticles (NM300K) are difference from those of AgNO3: effects in the soil invertebrate enchytraeus. Int. J. Environ. Res. Public Health, 12, 9589-9602	NM300K	AgNM	JRC	Suspension	Ag	*	*	89.8	Tween	9005-70-3	8% (4% each)	*	17	Below 20	*	*	TEM	*	Spheroidal	*	*	*	*	*	*	*	MilliQ Water and 10.2% of Ag in suspension	*	52.31	Mean	NTA	*	*	*	*	*	Solid	Natural media	LUFA 2.2	Light	16
463	SR	Article	Soil	Ribeiro	2015	10.3390/ijerph120809589	Oxidative stress mechanisms caused by Ag nanoparticles (NM300K) are difference from those of AgNO3: effects in the soil invertebrate enchytraeus crypticus	Ribeiro et al 2015. xidative stress mechanisms caused by Ag nanoparticles (NM300K) are difference from those of AgNO3: effects in the soil invertebrate enchytraeus. Int. J. Environ. Res. Public Health, 12, 9589-9602	NM300K	AgNM	JRC	Suspension	Ag	*	*	89.8	Tween	9005-70-3	8% (4% each)	*	17	Below 20	*	*	TEM	*	Spheroidal	*	*	*	*	*	*	*	MilliQ Water and 10.2% of Ag in suspension	*	52.31	Mean	NTA	*	*	*	*	*	Solid	Natural media	LUFA 2.2	Light	16
464	SR	Article	Soil	Ribeiro	2015	10.3390/ijerph120809589	Oxidative stress mechanisms caused by Ag nanoparticles (NM300K) are difference from those of AgNO3: effects in the soil invertebrate enchytraeus crypticus	Ribeiro et al 2015. xidative stress mechanisms caused by Ag nanoparticles (NM300K) are difference from those of AgNO3: effects in the soil invertebrate enchytraeus. Int. J. Environ. Res. Public Health, 12, 9589-9602	NM300K	AgNM	JRC	Suspension	Ag	*	*	89.8	Tween	9005-70-3	8% (4% each)	*	17	Below 20	*	*	TEM	*	Spheroidal	*	*	*	*	*	*	*	MilliQ Water and 10.2% of Ag in suspension	*	52.31	Mean	NTA	*	*	*	*	*	Solid	Natural media	LUFA 2.2	Light	16
465	SR	Article	Soil	Ribeiro	2015	10.3390/ijerph120809589	Oxidative stress mechanisms caused by Ag nanoparticles (NM300K) are difference from those of AgNO3: effects in the soil invertebrate enchytraeus crypticus	Ribeiro et al 2015. xidative stress mechanisms caused by Ag nanoparticles (NM300K) are difference from those of AgNO3: effects in the soil invertebrate enchytraeus. Int. J. Environ. Res. Public Health, 12, 9589-9602	NM300K	AgNM	JRC	Suspension	Ag	*	*	89.8	Tween	9005-70-3	8% (4% each)	*	17	Below 20	*	*	TEM	*	Spheroidal	*	*	*	*	*	*	*	MilliQ Water and 10.2% of Ag in suspension	*	52.31	Mean	NTA	*	*	*	*	*	Solid	Natural media	LUFA 2.2	Light	16
466	SR	Article	Soil	Ribeiro	2015	10.3390/ijerph120809589	Oxidative stress mechanisms caused by Ag nanoparticles (NM300K) are difference from those of AgNO3: effects in the soil invertebrate enchytraeus crypticus	Ribeiro et al 2015. xidative stress mechanisms caused by Ag nanoparticles (NM300K) are difference from those of AgNO3: effects in the soil invertebrate enchytraeus. Int. J. Environ. Res. Public Health, 12, 9589-9602	NM300K	AgNM	JRC	Suspension	Ag	*	*	89.8	Tween	9005-70-3	8% (4% each)	*	17	Below 20	*	*	TEM	*	Spheroidal	*	*	*	*	*	*	*	MilliQ Water and 10.2% of Ag in suspension	*	52.31	Mean	NTA	*	*	*	*	*	Solid	Natural media	LUFA 2.2	Light	16
467	SR	Article	Soil	Ribeiro	2015	10.3390/ijerph120809589	Oxidative stress mechanisms caused by Ag nanoparticles (NM300K) are difference from those of AgNO3: effects in the soil invertebrate enchytraeus crypticus	Ribeiro et al 2015. xidative stress mechanisms caused by Ag nanoparticles (NM300K) are difference from those of AgNO3: effects in the soil invertebrate enchytraeus. Int. J. Environ. Res. Public Health, 12, 9589-9602	NM300K	AgNM	JRC	Suspension	Ag	*	*	89.8	Tween	9005-70-3	8% (4% each)	*	17	Below 20	*	*	TEM	*	Spheroidal	*	*	*	*	*	*	*	MilliQ Water and 10.2% of Ag in suspension	*	52.31	Mean	NTA	*	*	*	*	*	Solid	Natural media	LUFA 2.2	Light	16
468	SR	Article	Soil	Ribeiro	2015	10.3390/ijerph120809589	Oxidative stress mechanisms caused by Ag nanoparticles (NM300K) are difference from those of AgNO3: effects in the soil invertebrate enchytraeus crypticus	Ribeiro et al 2015. xidative stress mechanisms caused by Ag nanoparticles (NM300K) are difference from those of AgNO3: effects in the soil invertebrate enchytraeus. Int. J. Environ. Res. Public Health, 12, 9589-9602	NM300K	AgNM	JRC	Suspension	Ag	*	*	89.8	Tween	9005-70-3	8% (4% each)	*	17	Below 20	*	*	TEM	*	Spheroidal	*	*	*	*	*	*	*	MilliQ Water and 10.2% of Ag in suspension	*	52.31	Mean	NTA	*	*	*	*	*	Solid	Natural media	LUFA 2.2	Light	16
469	SR	Article	Soil	Ribeiro	2015	10.3390/ijerph120809589	Oxidative stress mechanisms caused by Ag nanoparticles (NM300K) are difference from those of AgNO3: effects in the soil invertebrate enchytraeus crypticus	Ribeiro et al 2015. xidative stress mechanisms caused by Ag nanoparticles (NM300K) are difference from those of AgNO3: effects in the soil invertebrate enchytraeus. Int. J. Environ. Res. Public Health, 12, 9589-9602	NM300K	AgNM	JRC	Suspension	Ag	*	*	89.8	Tween	9005-70-3	8% (4% each)	*	17	Below 20	*	*	TEM	*	Spheroidal	*	*	*	*	*	*	*	MilliQ Water and 10.2% of Ag in suspension	*	52.31	Mean	NTA	*	*	*	*	*	Solid	Natural media	LUFA 2.2	Light	16
470	SR	Article	Soil	Ribeiro	2015	10.3390/ijerph120809589	Oxidative stress mechanisms caused by Ag nanoparticles (NM300K) are difference from those of AgNO3: effects in the soil invertebrate enchytraeus crypticus	Ribeiro et al 2015. xidative stress mechanisms caused by Ag nanoparticles (NM300K) are difference from those of AgNO3: effects in the soil invertebrate enchytraeus. Int. J. Environ. Res. Public Health, 12, 9589-9602	NM300K	AgNM	JRC	Suspension	Ag	*	*	89.8	Tween	9005-70-3	8% (4% each)	*	17	Below 20	*	*	TEM	*	Spheroidal	*	*	*	*	*	*	*	MilliQ Water and 10.2% of Ag in suspension	*	52.31	Mean	NTA	*	*	*	*	*	Solid	Natural media	LUFA 2.2	Light	16
471	SR	Article	Soil	Ribeiro	2015	10.3390/ijerph120809589	Oxidative stress mechanisms caused by Ag nanoparticles (NM300K) are difference from those of AgNO3: effects in the soil invertebrate enchytraeus crypticus	Ribeiro et al 2015. xidative stress mechanisms caused by Ag nanoparticles (NM300K) are difference from those of AgNO3: effects in the soil invertebrate enchytraeus. Int. J. Environ. Res. Public Health, 12, 9589-9602	NM300K	AgNM	JRC	Suspension	Ag	*	*	89.8	Tween	9005-70-3	8% (4% each)	*	17	Below 20	*	*	TEM	*	Spheroidal	*	*	*	*	*	*	*	MilliQ Water and 10.2% of Ag in suspension	*	52.31	Mean	NTA	*	*	*	*	*	Solid	Natural media	LUFA 2.2	Light	16
472	SR	Article	Soil	Ribeiro	2015	10.3390/ijerph120809589	Oxidative stress mechanisms caused by Ag nanoparticles (NM300K) are difference from those of AgNO3: effects in the soil invertebrate enchytraeus crypticus	Ribeiro et al 2015. xidative stress mechanisms caused by Ag nanoparticles (NM300K) are difference from those of AgNO3: effects in the soil invertebrate enchytraeus. Int. J. Environ. Res. Public Health, 12, 9589-9602	NM300K	AgNM	JRC	Suspension	Ag	*	*	89.8	Tween	9005-70-3	8% (4% each)	*	17	Below 20	*	*	TEM	*	Spheroidal	*	*	*	*	*	*	*	MilliQ Water and 10.2% of Ag in suspension	*	52.31	Mean	NTA	*	*	*	*	*	Solid	Natural media	LUFA 2.2	Light	16
473	SR	Article	Soil	Grun	2018	10.1186/s12302-018-0160-2	Long-term effects of environmentally relevant concentrations of silver nanoparticles on major soil bacterial phyla of a loamy soil	Grun et al 2018. Long-term effects of environmentally relevant concentrations of silver nanoparticles on major soil bacterial phyla of a loamy soil. Environmental Sciences Europe, 30, 31	AgNM	AgNM	Ras Materials	Suspension	Ag	*	*	*	Tween-NH4NO3	9005-70-3 and 6484-52-2	8% (4% each) and 7.5% ammonium nitrate	*	20	20-50	*	*	TEM	*	Spheroidal	*	*	*	*	*	*	*	MilliQ water	*	*	*	*	*	*	*	*	*	Solid	Natural media	*	Dark	*
475	SR	Article	Soil	Grun	2018	10.1186/s12302-018-0160-2	Long-term effects of environmentally relevant concentrations of silver nanoparticles on major soil bacterial phyla of a loamy soil	Grun et al 2018. Long-term effects of environmentally relevant concentrations of silver nanoparticles on major soil bacterial phyla of a loamy soil. Environmental Sciences Europe, 30, 31	AgNM	AgNM	Ras Materials	Suspension	Ag	*	*	*	Tween-NH4NO3	9005-70-3 and 6484-52-2	8% (4% each) and 7.5% ammonium nitrate	*	20	20-50	*	*	TEM	*	Spheroidal	*	*	*	*	*	*	*	MilliQ water	*	*	*	*	*	*	*	*	*	Solid	Natural media	*	Dark	*
476	SR	Article	Soil	Grun	2018	10.1186/s12302-018-0160-2	Long-term effects of environmentally relevant concentrations of silver nanoparticles on major soil bacterial phyla of a loamy soil	Grun et al 2018. Long-term effects of environmentally relevant concentrations of silver nanoparticles on major soil bacterial phyla of a loamy soil. Environmental Sciences Europe, 30, 31	AgNM	AgNM	Ras Materials	Suspension	Ag	*	*	*	Tween-NH4NO3	9005-70-3 and 6484-52-2	8% (4% each) and 7.5% ammonium nitrate	*	20	20-50	*	*	TEM	*	Spheroidal	*	*	*	*	*	*	*	MilliQ water	*	*	*	*	*	*	*	*	*	Solid	Natural media	*	Dark	*
477	SR	Article	Soil	Grun	2018	10.1186/s12302-018-0160-2	Long-term effects of environmentally relevant concentrations of silver nanoparticles on major soil bacterial phyla of a loamy soil	Grun et al 2018. Long-term effects of environmentally relevant concentrations of silver nanoparticles on major soil bacterial phyla of a loamy soil. Environmental Sciences Europe, 30, 31	AgNO3		*	*	Ag	7761-88-8	*	*	*	*	*	*	Unreported	Unreported	*	*	*	*	*	*	*	*	*	*	*	*	*	*	*	*	*	*	*	*	*	*	Solid	Natural media	*	Dark	*
478	SR	Article	Soil	Grun	2018	10.1186/s12302-018-0160-2	Long-term effects of environmentally relevant concentrations of silver nanoparticles on major soil bacterial phyla of a loamy soil	Grun et al 2018. Long-term effects of environmentally relevant concentrations of silver nanoparticles on major soil bacterial phyla of a loamy soil. Environmental Sciences Europe, 30, 31	AgNO3		*	*	Ag	7761-88-8	*	*	*	*	*	*	Unreported	Unreported	*	*	*	*	*	*	*	*	*	*	*	*	*	*	*	*	*	*	*	*	*	*	Solid	Natural media	*	Dark	*
482	SR	Article	Soil	Grun	2018	10.1186/s12302-018-0160-2	Long-term effects of environmentally relevant concentrations of silver nanoparticles on major soil bacterial phyla of a loamy soil	Grun et al 2018. Long-term effects of environmentally relevant concentrations of silver nanoparticles on major soil bacterial phyla of a loamy soil. Environmental Sciences Europe, 30, 31	AgNM	AgNM	Ras Materials	Suspension	Ag	*	*	*	Tween-NH4NO3	9005-70-3 and 6484-52-2	8% (4% each) and 7.5% ammonium nitrate	*	20	20-50	*	*	TEM	*	Spheroidal	*	*	*	*	*	*	*	MilliQ water	*	*	*	*	*	*	*	*	*	Solid	Natural media	*	Dark	*
483	SR	Article	Soil	Grun	2018	10.1186/s12302-018-0160-2	Long-term effects of environmentally relevant concentrations of silver nanoparticles on major soil bacterial phyla of a loamy soil	Grun et al 2018. Long-term effects of environmentally relevant concentrations of silver nanoparticles on major soil bacterial phyla of a loamy soil. Environmental Sciences Europe, 30, 31	AgNM	AgNM	Ras Materials	Suspension	Ag	*	*	*	Tween-NH4NO3	9005-70-3 and 6484-52-2	8% (4% each) and 7.5% ammonium nitrate	*	20	20-50	*	*	TEM	*	Spheroidal	*	*	*	*	*	*	*	MilliQ water	*	*	*	*	*	*	*	*	*	Solid	Natural media	*	Dark	*
486	SR	Article	Soil	Grun	2018	10.1186/s12302-018-0160-2	Long-term effects of environmentally relevant concentrations of silver nanoparticles on major soil bacterial phyla of a loamy soil	Grun et al 2018. Long-term effects of environmentally relevant concentrations of silver nanoparticles on major soil bacterial phyla of a loamy soil. Environmental Sciences Europe, 30, 31	AgNM	AgNM	Ras Materials	Suspension	Ag	*	*	*	Tween-NH4NO3	9005-70-3 and 6484-52-2	8% (4% each) and 7.5% ammonium nitrate	*	20	20-50	*	*	TEM	*	Spheroidal	*	*	*	*	*	*	*	MilliQ water	*	*	*	*	*	*	*	*	*	Solid	Natural media	*	Dark	*
491	SR	Article	Soil	Grun	2018	10.1186/s12302-018-0160-2	Long-term effects of environmentally relevant concentrations of silver nanoparticles on major soil bacterial phyla of a loamy soil	Grun et al 2018. Long-term effects of environmentally relevant concentrations of silver nanoparticles on major soil bacterial phyla of a loamy soil. Environmental Sciences Europe, 30, 31	AgNO3		*	*	Ag	7761-88-8	*	*	*	*	*	*	Unreported	Unreported	*	*	*	*	*	*	*	*	*	*	*	*	*	*	*	*	*	*	*	*	*	*	Solid	Natural media	*	Dark	*
493	SR	Article	Soil	Grun	2018	10.1186/s12302-018-0160-2	Long-term effects of environmentally relevant concentrations of silver nanoparticles on major soil bacterial phyla of a loamy soil	Grun et al 2018. Long-term effects of environmentally relevant concentrations of silver nanoparticles on major soil bacterial phyla of a loamy soil. Environmental Sciences Europe, 30, 31	AgNO3		*	*	Ag	7761-88-8	*	*	*	*	*	*	Unreported	Unreported	*	*	*	*	*	*	*	*	*	*	*	*	*	*	*	*	*	*	*	*	*	*	Solid	Natural media	*	Dark	*
495	SR	Article	Soil	Grun	2018	10.1186/s12302-018-0160-2	Long-term effects of environmentally relevant concentrations of silver nanoparticles on major soil bacterial phyla of a loamy soil	Grun et al 2018. Long-term effects of environmentally relevant concentrations of silver nanoparticles on major soil bacterial phyla of a loamy soil. Environmental Sciences Europe, 30, 31	AgNO3		*	*	Ag	7761-88-8	*	*	*	*	*	*	Unreported	Unreported	*	*	*	*	*	*	*	*	*	*	*	*	*	*	*	*	*	*	*	*	*	*	Solid	Natural media	*	Dark	*
499	SR	Article	Soil	Grun	2018	10.1186/s12302-018-0160-2	Long-term effects of environmentally relevant concentrations of silver nanoparticles on major soil bacterial phyla of a loamy soil	Grun et al 2018. Long-term effects of environmentally relevant concentrations of silver nanoparticles on major soil bacterial phyla of a loamy soil. Environmental Sciences Europe, 30, 31	AgNM	AgNM	Ras Materials	Suspension	Ag	*	*	*	Tween-NH4NO3	9005-70-3 and 6484-52-2	8% (4% each) and 7.5% ammonium nitrate	*	20	20-50	*	*	TEM	*	Spheroidal	*	*	*	*	*	*	*	MilliQ water	*	*	*	*	*	*	*	*	*	Solid	Natural media	*	Dark	*
501	SR	Article	Soil	Grun	2018	10.1186/s12302-018-0160-2	Long-term effects of environmentally relevant concentrations of silver nanoparticles on major soil bacterial phyla of a loamy soil	Grun et al 2018. Long-term effects of environmentally relevant concentrations of silver nanoparticles on major soil bacterial phyla of a loamy soil. Environmental Sciences Europe, 30, 31	AgNM	AgNM	Ras Materials	Suspension	Ag	*	*	*	Tween-NH4NO3	9005-70-3 and 6484-52-2	8% (4% each) and 7.5% ammonium nitrate	*	20	20-50	*	*	TEM	*	Spheroidal	*	*	*	*	*	*	*	MilliQ water	*	*	*	*	*	*	*	*	*	Solid	Natural media	*	Dark	*
505	SR	Article	Soil	Grun	2018	10.1186/s12302-018-0160-2	Long-term effects of environmentally relevant concentrations of silver nanoparticles on major soil bacterial phyla of a loamy soil	Grun et al 2018. Long-term effects of environmentally relevant concentrations of silver nanoparticles on major soil bacterial phyla of a loamy soil. Environmental Sciences Europe, 30, 31	AgNO3		*	*	Ag	7761-88-8	*	*	*	*	*	*	Unreported	Unreported	*	*	*	*	*	*	*	*	*	*	*	*	*	*	*	*	*	*	*	*	*	*	Solid	Natural media	*	Dark	*
508	SR	Article	Soil	Grun	2018	10.1186/s12302-018-0160-2	Long-term effects of environmentally relevant concentrations of silver nanoparticles on major soil bacterial phyla of a loamy soil	Grun et al 2018. Long-term effects of environmentally relevant concentrations of silver nanoparticles on major soil bacterial phyla of a loamy soil. Environmental Sciences Europe, 30, 31	AgNO3		*	*	Ag	7761-88-8	*	*	*	*	*	*	Unreported	Unreported	*	*	*	*	*	*	*	*	*	*	*	*	*	*	*	*	*	*	*	*	*	*	Solid	Natural media	*	Dark	*
511	SR	Article	Soil	Grun	2018	10.1186/s12302-018-0160-2	Long-term effects of environmentally relevant concentrations of silver nanoparticles on major soil bacterial phyla of a loamy soil	Grun et al 2018. Long-term effects of environmentally relevant concentrations of silver nanoparticles on major soil bacterial phyla of a loamy soil. Environmental Sciences Europe, 30, 31	AgNO3		*	*	Ag	7761-88-8	*	*	*	*	*	*	Unreported	Unreported	*	*	*	*	*	*	*	*	*	*	*	*	*	*	*	*	*	*	*	*	*	*	Solid	Natural media	*	Dark	*
514	SR	Article	Soil	Grun	2018	10.1186/s12302-018-0160-2	Long-term effects of environmentally relevant concentrations of silver nanoparticles on major soil bacterial phyla of a loamy soil	Grun et al 2018. Long-term effects of environmentally relevant concentrations of silver nanoparticles on major soil bacterial phyla of a loamy soil. Environmental Sciences Europe, 30, 31	AgNO3		*	*	Ag	7761-88-8	*	*	*	*	*	*	Unreported	Unreported	*	*	*	*	*	*	*	*	*	*	*	*	*	*	*	*	*	*	*	*	*	*	Solid	Natural media	*	Dark	*
517	SR	Article	Soil	Grun	2018	10.1186/s12302-018-0160-2	Long-term effects of environmentally relevant concentrations of silver nanoparticles on major soil bacterial phyla of a loamy soil	Grun et al 2018. Long-term effects of environmentally relevant concentrations of silver nanoparticles on major soil bacterial phyla of a loamy soil. Environmental Sciences Europe, 30, 31	AgNM	AgNM	Ras Materials	Suspension	Ag	*	*	*	Tween-NH4NO3	9005-70-3 and 6484-52-2	8% (4% each) and 7.5% ammonium nitrate	*	20	20-50	*	*	TEM	*	Spheroidal	*	*	*	*	*	*	*	MilliQ water	*	*	*	*	*	*	*	*	*	Solid	Natural media	*	Dark	*
520	SR	Article	Soil	Grun	2018	10.1186/s12302-018-0160-2	Long-term effects of environmentally relevant concentrations of silver nanoparticles on major soil bacterial phyla of a loamy soil	Grun et al 2018. Long-term effects of environmentally relevant concentrations of silver nanoparticles on major soil bacterial phyla of a loamy soil. Environmental Sciences Europe, 30, 31	AgNM	AgNM	Ras Materials	Suspension	Ag	*	*	*	Tween-NH4NO3	9005-70-3 and 6484-52-2	8% (4% each) and 7.5% ammonium nitrate	*	20	20-50	*	*	TEM	*	Spheroidal	*	*	*	*	*	*	*	MilliQ water	*	*	*	*	*	*	*	*	*	Solid	Natural media	*	Dark	*
523	SR	Article	Soil	Grun	2018	10.1186/s12302-018-0160-2	Long-term effects of environmentally relevant concentrations of silver nanoparticles on major soil bacterial phyla of a loamy soil	Grun et al 2018. Long-term effects of environmentally relevant concentrations of silver nanoparticles on major soil bacterial phyla of a loamy soil. Environmental Sciences Europe, 30, 31	AgNM	AgNM	Ras Materials	Suspension	Ag	*	*	*	Tween-NH4NO3	9005-70-3 and 6484-52-2	8% (4% each) and 7.5% ammonium nitrate	*	20	20-50	*	*	TEM	*	Spheroidal	*	*	*	*	*	*	*	MilliQ water	*	*	*	*	*	*	*	*	*	Solid	Natural media	*	Dark	*
526	SR	Article	Soil	Grun	2018	10.1186/s12302-018-0160-2	Long-term effects of environmentally relevant concentrations of silver nanoparticles on major soil bacterial phyla of a loamy soil	Grun et al 2018. Long-term effects of environmentally relevant concentrations of silver nanoparticles on major soil bacterial phyla of a loamy soil. Environmental Sciences Europe, 30, 31	AgNM	AgNM	Ras Materials	Suspension	Ag	*	*	*	Tween-NH4NO3	9005-70-3 and 6484-52-2	8% (4% each) and 7.5% ammonium nitrate	*	20	20-50	*	*	TEM	*	Spheroidal	*	*	*	*	*	*	*	MilliQ water	*	*	*	*	*	*	*	*	*	Solid	Natural media	*	Dark	*
529	SR	Article	Soil	Grun	2018	10.1186/s12302-018-0160-2	Long-term effects of environmentally relevant concentrations of silver nanoparticles on major soil bacterial phyla of a loamy soil	Grun et al 2018. Long-term effects of environmentally relevant concentrations of silver nanoparticles on major soil bacterial phyla of a loamy soil. Environmental Sciences Europe, 30, 31	AgNO3		*	*	Ag	7761-88-8	*	*	*	*	*	*	Unreported	Unreported	*	*	*	*	*	*	*	*	*	*	*	*	*	*	*	*	*	*	*	*	*	*	Solid	Natural media	*	Dark	*
532	SR	Article	Soil	Grun	2018	10.1186/s12302-018-0160-2	Long-term effects of environmentally relevant concentrations of silver nanoparticles on major soil bacterial phyla of a loamy soil	Grun et al 2018. Long-term effects of environmentally relevant concentrations of silver nanoparticles on major soil bacterial phyla of a loamy soil. Environmental Sciences Europe, 30, 31	AgNO3		*	*	Ag	7761-88-8	*	*	*	*	*	*	Unreported	Unreported	*	*	*	*	*	*	*	*	*	*	*	*	*	*	*	*	*	*	*	*	*	*	Solid	Natural media	*	Dark	*
535	SR	Article	Soil	Grun	2018	10.1186/s12302-018-0160-2	Long-term effects of environmentally relevant concentrations of silver nanoparticles on major soil bacterial phyla of a loamy soil	Grun et al 2018. Long-term effects of environmentally relevant concentrations of silver nanoparticles on major soil bacterial phyla of a loamy soil. Environmental Sciences Europe, 30, 31	AgNO3		*	*	Ag	7761-88-8	*	*	*	*	*	*	Unreported	Unreported	*	*	*	*	*	*	*	*	*	*	*	*	*	*	*	*	*	*	*	*	*	*	Solid	Natural media	*	Dark	*
538	SR	Article	Soil	Grun	2018	10.1186/s12302-018-0160-2	Long-term effects of environmentally relevant concentrations of silver nanoparticles on major soil bacterial phyla of a loamy soil	Grun et al 2018. Long-term effects of environmentally relevant concentrations of silver nanoparticles on major soil bacterial phyla of a loamy soil. Environmental Sciences Europe, 30, 31	AgNO3		*	*	Ag	7761-88-8	*	*	*	*	*	*	Unreported	Unreported	*	*	*	*	*	*	*	*	*	*	*	*	*	*	*	*	*	*	*	*	*	*	Solid	Natural media	*	Dark	*
541	SR	Article	Soil	Grun	2018	10.1186/s12302-018-0160-2	Long-term effects of environmentally relevant concentrations of silver nanoparticles on major soil bacterial phyla of a loamy soil	Grun et al 2018. Long-term effects of environmentally relevant concentrations of silver nanoparticles on major soil bacterial phyla of a loamy soil. Environmental Sciences Europe, 30, 31	AgNO3		*	*	Ag	7761-88-8	*	*	*	*	*	*	Unreported	Unreported	*	*	*	*	*	*	*	*	*	*	*	*	*	*	*	*	*	*	*	*	*	*	Solid	Natural media	*	Dark	*
544	SR	Article	Soil	Grun	2018	10.1186/s12302-018-0160-2	Long-term effects of environmentally relevant concentrations of silver nanoparticles on major soil bacterial phyla of a loamy soil	Grun et al 2018. Long-term effects of environmentally relevant concentrations of silver nanoparticles on major soil bacterial phyla of a loamy soil. Environmental Sciences Europe, 30, 31	AgNM	AgNM	Ras Materials	Suspension	Ag	*	*	*	Tween-NH4NO3	9005-70-3 and 6484-52-2	8% (4% each) and 7.5% ammonium nitrate	*	20	20-50	*	*	TEM	*	Spheroidal	*	*	*	*	*	*	*	MilliQ water	*	*	*	*	*	*	*	*	*	Solid	Natural media	*	Dark	*
545	SR	Article	Soil	Grun	2018	10.1186/s12302-018-0160-2	Long-term effects of environmentally relevant concentrations of silver nanoparticles on major soil bacterial phyla of a loamy soil	Grun et al 2018. Long-term effects of environmentally relevant concentrations of silver nanoparticles on major soil bacterial phyla of a loamy soil. Environmental Sciences Europe, 30, 31	AgNM	AgNM	Ras Materials	Suspension	Ag	*	*	*	Tween-NH4NO3	9005-70-3 and 6484-52-2	8% (4% each) and 7.5% ammonium nitrate	*	20	20-50	*	*	TEM	*	Spheroidal	*	*	*	*	*	*	*	MilliQ water	*	*	*	*	*	*	*	*	*	Solid	Natural media	*	Dark	*
547	SR	Article	Soil	Grun	2018	10.1186/s12302-018-0160-2	Long-term effects of environmentally relevant concentrations of silver nanoparticles on major soil bacterial phyla of a loamy soil	Grun et al 2018. Long-term effects of environmentally relevant concentrations of silver nanoparticles on major soil bacterial phyla of a loamy soil. Environmental Sciences Europe, 30, 31	AgNM	AgNM	Ras Materials	Suspension	Ag	*	*	*	Tween-NH4NO3	9005-70-3 and 6484-52-2	8% (4% each) and 7.5% ammonium nitrate	*	20	20-50	*	*	TEM	*	Spheroidal	*	*	*	*	*	*	*	MilliQ water	*	*	*	*	*	*	*	*	*	Solid	Natural media	*	Dark	*
550	SR	Article	Soil	Grun	2018	10.1186/s12302-018-0160-2	Long-term effects of environmentally relevant concentrations of silver nanoparticles on major soil bacterial phyla of a loamy soil	Grun et al 2018. Long-term effects of environmentally relevant concentrations of silver nanoparticles on major soil bacterial phyla of a loamy soil. Environmental Sciences Europe, 30, 31	AgNM	AgNM	Ras Materials	Suspension	Ag	*	*	*	Tween-NH4NO3	9005-70-3 and 6484-52-2	8% (4% each) and 7.5% ammonium nitrate	*	20	20-50	*	*	TEM	*	Spheroidal	*	*	*	*	*	*	*	MilliQ water	*	*	*	*	*	*	*	*	*	Solid	Natural media	*	Dark	*
553	SR	Article	Soil	Grun	2018	10.1186/s12302-018-0160-2	Long-term effects of environmentally relevant concentrations of silver nanoparticles on major soil bacterial phyla of a loamy soil	Grun et al 2018. Long-term effects of environmentally relevant concentrations of silver nanoparticles on major soil bacterial phyla of a loamy soil. Environmental Sciences Europe, 30, 31	AgNM	AgNM	Ras Materials	Suspension	Ag	*	*	*	Tween-NH4NO3	9005-70-3 and 6484-52-2	8% (4% each) and 7.5% ammonium nitrate	*	20	20-50	*	*	TEM	*	Spheroidal	*	*	*	*	*	*	*	MilliQ water	*	*	*	*	*	*	*	*	*	Solid	Natural media	*	Dark	*
556	SR	Article	Soil	Grun	2018	10.1186/s12302-018-0160-2	Long-term effects of environmentally relevant concentrations of silver nanoparticles on major soil bacterial phyla of a loamy soil	Grun et al 2018. Long-term effects of environmentally relevant concentrations of silver nanoparticles on major soil bacterial phyla of a loamy soil. Environmental Sciences Europe, 30, 31	AgNM	AgNM	Ras Materials	Suspension	Ag	*	*	*	Tween-NH4NO3	9005-70-3 and 6484-52-2	8% (4% each) and 7.5% ammonium nitrate	*	20	20-50	*	*	TEM	*	Spheroidal	*	*	*	*	*	*	*	MilliQ water	*	*	*	*	*	*	*	*	*	Solid	Natural media	*	Dark	*
563	SR	Article	Soil	Grun	2018	10.1186/s12302-018-0160-2	Long-term effects of environmentally relevant concentrations of silver nanoparticles on major soil bacterial phyla of a loamy soil	Grun et al 2018. Long-term effects of environmentally relevant concentrations of silver nanoparticles on major soil bacterial phyla of a loamy soil. Environmental Sciences Europe, 30, 31	AgNO3		*	*	Ag	7761-88-8	*	*	*	*	*	*	Unreported	Unreported	*	*	*	*	*	*	*	*	*	*	*	*	*	*	*	*	*	*	*	*	*	*	Solid	Natural media	*	Dark	*
566	SR	Article	Soil	Grun	2018	10.1186/s12302-018-0160-2	Long-term effects of environmentally relevant concentrations of silver nanoparticles on major soil bacterial phyla of a loamy soil	Grun et al 2018. Long-term effects of environmentally relevant concentrations of silver nanoparticles on major soil bacterial phyla of a loamy soil. Environmental Sciences Europe, 30, 31	AgNO3		*	*	Ag	7761-88-8	*	*	*	*	*	*	Unreported	Unreported	*	*	*	*	*	*	*	*	*	*	*	*	*	*	*	*	*	*	*	*	*	*	Solid	Natural media	*	Dark	*
568	SR	Article	Soil	Grun	2018	10.1186/s12302-018-0160-2	Long-term effects of environmentally relevant concentrations of silver nanoparticles on major soil bacterial phyla of a loamy soil	Grun et al 2018. Long-term effects of environmentally relevant concentrations of silver nanoparticles on major soil bacterial phyla of a loamy soil. Environmental Sciences Europe, 30, 31	AgNO3		*	*	Ag	7761-88-8	*	*	*	*	*	*	Unreported	Unreported	*	*	*	*	*	*	*	*	*	*	*	*	*	*	*	*	*	*	*	*	*	*	Solid	Natural media	*	Dark	*
571	SR	Article	Soil	Maria	2017	10.1002/etc.3944	Silver nanomaterials cause genotoxicity in enchytraeus crypticus as determined by the comet assay	Maria et al 2017. Silver nanomaterials cause genotoxicity in enchytraeus crypticus as determined by the comet assay. Environmental Toxicology and Chemistry, 37, 184–191	AgNO3		Sigma-Aldrich	Suspension	Ag	7761-88-8	*	1	*	*	*	*	Unreported	Unreported	*	*	*	*	*	*	*	*	*	*	*	*	*	*	*	*	*	*	*	*	*	*	Solid	Natural media	LUFA 2.2	Light	16
572	SR	Article	Soil	Maria	2017	10.1002/etc.3944	Silver nanomaterials cause genotoxicity in enchytraeus crypticus as determined by the comet assay	Maria et al 2017. Silver nanomaterials cause genotoxicity in enchytraeus crypticus as determined by the comet assay. Environmental Toxicology and Chemistry, 37, 184–191	AgNO3		Sigma-Aldrich	Suspension	Ag	7761-88-8	*	1	*	*	*	*	Unreported	Unreported	*	*	*	*	*	*	*	*	*	*	*	*	*	*	*	*	*	*	*	*	*	*	Solid	Natural media	LUFA 2.2	Light	16
573	SR	Article	Soil	Maria	2017	10.1002/etc.3944	Silver nanomaterials cause genotoxicity in enchytraeus crypticus as determined by the comet assay	Maria et al 2017. Silver nanomaterials cause genotoxicity in enchytraeus crypticus as determined by the comet assay. Environmental Toxicology and Chemistry, 37, 184–191	AgNO3		Sigma-Aldrich	Suspension	Ag	7761-88-8	*	1	*	*	*	*	Unreported	Unreported	*	*	*	*	*	*	*	*	*	*	*	*	*	*	*	*	*	*	*	*	*	*	Solid	Natural media	LUFA 2.2	Light	16
574	SR	Article	Soil	Maria	2017	10.1002/etc.3944	Silver nanomaterials cause genotoxicity in enchytraeus crypticus as determined by the comet assay	Maria et al 2017. Silver nanomaterials cause genotoxicity in enchytraeus crypticus as determined by the comet assay. Environmental Toxicology and Chemistry, 37, 184–191	NM300K	AgNM	JRC	Suspension	Ag	*	*	89.8	Tween	9005-70-3	8% (4% each)	*	15	Below 20	*	*	TEM	*	Spheroidal	*	*	*	*	*	*	*	MilliQ Water and 10.2% of Ag in suspension	*	52.31	Mean	NTA	*	*	*	*	*	Solid	Natural media	LUFA 2.2	Light	16
575	SR	Article	Soil	Maria	2017	10.1002/etc.3944	Silver nanomaterials cause genotoxicity in enchytraeus crypticus as determined by the comet assay	Maria et al 2017. Silver nanomaterials cause genotoxicity in enchytraeus crypticus as determined by the comet assay. Environmental Toxicology and Chemistry, 37, 184–191	NM300K	AgNM	JRC	Suspension	Ag	*	*	89.8	Tween	9005-70-3	8% (4% each)	*	15	Below 20	*	*	TEM	*	Spheroidal	*	*	*	*	*	*	*	MilliQ Water and 10.2% of Ag in suspension	*	52.31	Mean	NTA	*	*	*	*	*	Solid	Natural media	LUFA 2.2	Light	16
576	SR	Article	Soil	Nyoka	2018	10.1007/s11356-018-1383-x	Biochar alleviates the toxicity of imidacloprid and silver nanoparticles (AgNPs) to Enchytraeus albidus	Nyoka et al 2018. Biochar alleviates the toxicity of imidacloprid and silver nanoparticles (AgNPs) to Enchytraeus albidus. Environmental Science and Pollution Research, 25, 10937-10945	NM300K	AgNM	JRC	Suspension	Ag	*	*	89.8	Tween	9005-70-3	8% (4% each)	*	15	Below 20	*	*	TEM	*	Spheroidal	*	*	*	*	*	*	*	MilliQ Water and 10.2% of Ag in suspension	*	52.31	Mean	NTA	*	*	*	*	*	Solid	Artificial	OECD soil	Dark	*
577	SR	Article	Soil	Nyoka	2018	10.1007/s11356-018-1383-x	Biochar alleviates the toxicity of imidacloprid and silver nanoparticles (AgNPs) to Enchytraeus albidus	Nyoka et al 2018. Biochar alleviates the toxicity of imidacloprid and silver nanoparticles (AgNPs) to Enchytraeus albidus. Environmental Science and Pollution Research, 25, 10937-10945	NM300K	AgNM	JRC	Suspension	Ag	*	*	89.8	Tween	9005-70-3	8% (4% each)	*	15	Below 20	*	*	TEM	*	Spheroidal	*	*	*	*	*	*	*	MilliQ Water and 10.2% of Ag in suspension	*	52.31	Mean	NTA	*	*	*	*	*	Solid	Artificial	OECD soil	Dark	*
578	SR	Article	Soil	Bicho	2021	10.1016/j.impact.2021.100300	Embryotoxicity of silver nanomaterials (Ag NM300K) in the soil invertebrate enchytraeus crypticus - functional assay detects Ca channels shutdown	Bicho et al 2016 Effects of Ag nanomaterials and Ag salt can be discriminated in a full life cycle long term test with Enchytraeus cryoticus. Journal of Hazardous Materials 318, 608–614 .	AgNO3		Sigma-Aldrich	*	Ag	7761-88-8	99	*	*	*	*	*	Unreported	Unreported	*	*	*	*	*	*	*	*	*	*	*	*	*	*	*	*	*	*	*	*	*	*	Solid	Natural media	LUFA 2.2	Light	16
579	SR	Article	Soil	Bicho	2021	10.1016/j.impact.2021.100300	Embryotoxicity of silver nanomaterials (Ag NM300K) in the soil invertebrate enchytraeus crypticus - functional assay detects Ca channels shutdown	Bicho et al 2016 Effects of Ag nanomaterials and Ag salt can be discriminated in a full life cycle long term test with Enchytraeus cryoticus. Journal of Hazardous Materials 318, 608–614 .	AgNO3		Sigma-Aldrich	*	Ag	7761-88-8	99	*	*	*	*	*	Unreported	Unreported	*	*	*	*	*	*	*	*	*	*	*	*	*	*	*	*	*	*	*	*	*	*	Solid	Natural media	LUFA 2.2	Light	16
580	SR	Article	Soil	Bicho	2021	10.1016/j.impact.2021.100300	Embryotoxicity of silver nanomaterials (Ag NM300K) in the soil invertebrate enchytraeus crypticus - functional assay detects Ca channels shutdown	Bicho et al 2016 Effects of Ag nanomaterials and Ag salt can be discriminated in a full life cycle long term test with Enchytraeus cryoticus. Journal of Hazardous Materials 318, 608–614 .	NM300K	AgNM	JRC	Suspension	Ag	*	*	89.8	Tween	9005-70-3	8% (4% each)	*	15	Below 20	*	*	TEM	*	Spheroidal	*	*	*	17	TEM	5	*	MilliQ Water and 10.2% of Ag in suspension	*	52.31	Mean	NTA	*	*	*	*	*	Solid	Natural media	LUFA 2.2	Light	16
581	SR	Article	Soil	Bicho	2021	10.1016/j.impact.2021.100300	Embryotoxicity of silver nanomaterials (Ag NM300K) in the soil invertebrate enchytraeus crypticus - functional assay detects Ca channels shutdown	Bicho et al 2016 Effects of Ag nanomaterials and Ag salt can be discriminated in a full life cycle long term test with Enchytraeus cryoticus. Journal of Hazardous Materials 318, 608–614 .	NM300K	AgNM	JRC	Suspension	Ag	*	*	89.8	Tween	9005-70-3	8% (4% each)	*	15	Below 20	*	*	TEM	*	Spheroidal	*	*	*	17	TEM	5	*	MilliQ Water and 10.2% of Ag in suspension	*	52.31	Mean	NTA	*	*	*	*	*	Solid	Natural media	LUFA 2.2	Light	16
582	SR	Article	Soil	Bicho	2021	10.1016/j.impact.2021.100300	Embryotoxicity of silver nanomaterials (Ag NM300K) in the soil invertebrate enchytraeus crypticus - functional assay detects Ca channels shutdown	Bicho et al 2016 Effects of Ag nanomaterials and Ag salt can be discriminated in a full life cycle long term test with Enchytraeus cryoticus. Journal of Hazardous Materials 318, 608–614 .	NM300K	AgNM	JRC	Suspension	Ag	*	*	89.8	Tween	9005-70-3	8% (4% each)	*	15	Below 20	*	*	TEM	*	Spheroidal	*	*	*	17	TEM	5	*	MilliQ Water and 10.2% of Ag in suspension	*	52.31	Mean	NTA	*	*	*	*	*	Solid	Natural media	LUFA 2.2	Light	16
583	SR	Article	Soil	Bicho	2021	10.1016/j.impact.2021.100300	Embryotoxicity of silver nanomaterials (Ag NM300K) in the soil invertebrate enchytraeus crypticus - functional assay detects Ca channels shutdown	Bicho et al 2016 Effects of Ag nanomaterials and Ag salt can be discriminated in a full life cycle long term test with Enchytraeus cryoticus. Journal of Hazardous Materials 318, 608–614 .	NM300K	AgNM	JRC	Suspension	Ag	*	*	89.8	Tween	9005-70-3	8% (4% each)	*	15	Below 20	*	*	TEM	*	Spheroidal	*	*	*	17	TEM	5	*	MilliQ Water and 10.2% of Ag in suspension	*	52.31	Mean	NTA	*	*	*	*	*	Solid	Natural media	LUFA 2.2	Light	16
585	SR	Article	Soil	Courtois	2021	10.1007/s11356-020-08548-z	Accumulation, speciation and localization of silver nanoparticles in the earthworm Eisenia fetida	Courtois et al 2021. Accumulation, speciation and localization of silver nanoparticles in the earthworm Eisenia fetida. Environ Sci Pollut Res (2021) 28:3756–3765	AgNO3		*	Suspension	Ag	7761-88-8	*	*	*	*	*	*	Unreported	Unreported	*	*	*	*	*	*	*	*	*	*	*	*	*	*	*	*	*	*	*	*	*	*	Solid	Artificial	OECD soil	*	*
587	SR	Article	Soil	Hayashi	2016	10.3109/17435390.2015.1054909	Nanosilver pathophysiology in earthworms	Hayashi et al 2016. Nanosilver pathophysiology in earthworms. Nanotoxicology, 10,3, 303-311	AgNO3		Sigma-Aldrich	Suspension	Ag	7761-88-8	*	*	*	*	*	*	Unreported	Unreported	*	*	*	*	*	*	*	*	*	*	*	*	*	*	*	*	*	*	*	*	*	*	Liquid	Artificial	RPMI-1640 medium	*	*
588	SR	Article	Soil	Hayashi	2016	10.3109/17435390.2015.1054909	Nanosilver pathophysiology in earthworms	Hayashi et al 2016. Nanosilver pathophysiology in earthworms. Nanotoxicology, 10,3, 303-311	AgNO3		Sigma-Aldrich	Suspension	Ag	7761-88-8	*	*	*	*	*	*	Unreported	Unreported	*	*	*	*	*	*	*	*	*	*	*	*	*	*	*	*	*	*	*	*	*	*	Liquid	Artificial	RPMI-1640 medium	*	*
589	SR	Article	Soil	Hayashi	2016	10.3109/17435390.2015.1054909	Nanosilver pathophysiology in earthworms	Hayashi et al 2016. Nanosilver pathophysiology in earthworms. Nanotoxicology, 10,3, 303-311	NM300K	AgNM	JRC	Suspension	Ag	*	*	89.8	Tween	9005-70-3	8% (4% each)	*	15	Below 20	*	*	TEM	*	Spheroidal	*	*	*	*	*	*	*	MilliQ Water and 10.2% of Ag in suspension	*	52.31	Mean	NTA	*	*	*	*	*	Liquid	Artificial	RPMI-1640 medium	*	*
590	SR	Article	Soil	Hayashi	2016	10.3109/17435390.2015.1054909	Nanosilver pathophysiology in earthworms	Hayashi et al 2016. Nanosilver pathophysiology in earthworms. Nanotoxicology, 10,3, 303-311	NM300K	AgNM	JRC	Suspension	Ag	*	*	89.8	Tween	9005-70-3	8% (4% each)	*	15	Below 20	*	*	TEM	*	Spheroidal	*	*	*	*	*	*	*	MilliQ Water and 10.2% of Ag in suspension	*	52.31	Mean	NTA	*	*	*	*	*	Liquid	Artificial	RPMI-1640 medium	*	*
591	SR	Article	Soil	Hayashi	2016	10.3109/17435390.2015.1054909	Nanosilver pathophysiology in earthworms	Hayashi et al 2016. Nanosilver pathophysiology in earthworms. Nanotoxicology, 10,3, 303-311	AgNO3		Sigma-Aldrich	Suspension	Ag	7761-88-8	*	*	*	*	*	*	Unreported	Unreported	*	*	*	*	*	*	*	*	*	*	*	*	*	*	*	*	*	*	*	*	*	*	Liquid	Artificial	RPMI-1640 medium	*	*
592	SR	Article	Soil	Hayashi	2016	10.3109/17435390.2015.1054909	Nanosilver pathophysiology in earthworms	Hayashi et al 2016. Nanosilver pathophysiology in earthworms. Nanotoxicology, 10,3, 303-311	AgNO3		Sigma-Aldrich	Suspension	Ag	7761-88-8	*	*	*	*	*	*	Unreported	Unreported	*	*	*	*	*	*	*	*	*	*	*	*	*	*	*	*	*	*	*	*	*	*	Liquid	Artificial	RPMI-1640 medium	*	*
593	SR	Article	Soil	Hayashi	2016	10.3109/17435390.2015.1054909	Nanosilver pathophysiology in earthworms	Hayashi et al 2016. Nanosilver pathophysiology in earthworms. Nanotoxicology, 10,3, 303-311	NM300K	AgNM	JRC	Suspension	Ag	*	*	89.8	Tween	9005-70-3	8% (4% each)	*	15	Below 20	*	*	TEM	*	Spheroidal	*	*	*	*	*	*	*	MilliQ Water and 10.2% of Ag in suspension	*	52.31	Mean	NTA	*	*	*	*	*	Liquid	Artificial	RPMI-1640 medium	*	*
594	SR	Article	Soil	Hayashi	2016	10.3109/17435390.2015.1054909	Nanosilver pathophysiology in earthworms	Hayashi et al 2016. Nanosilver pathophysiology in earthworms. Nanotoxicology, 10,3, 303-311	NM300K	AgNM	JRC	Suspension	Ag	*	*	89.8	Tween	9005-70-3	8% (4% each)	*	15	Below 20	*	*	TEM	*	Spheroidal	*	*	*	*	*	*	*	MilliQ Water and 10.2% of Ag in suspension	*	52.31	Mean	NTA	*	*	*	*	*	Liquid	Artificial	RPMI-1640 medium	*	*
595	SR	Article	Soil	Rossbach	2019	10.1016/j.scitotenv.2020.137665	Adaptive tolerance to multigenerational silver nanoparticle (NM300K) exposure by the nematode Caenorhabditis elegans is associated with increased sensitivity to AgNO3	Rossbach et al 2019. Adaptive tolerance to multigenerational silver nanoparticle (NM300K) exposure by the nematode Caenorhabditis elegans is associated with increased sensitivity to AgNO3. Nanotoxicology, 13, 4, 527-542	AgNO3		*	*	Ag	7761-88-8	*	*	*	*	*	*	Unreported	Unreported	*	*	*	*	*	*	*	*	*	*	*	*	*	*	*	*	*	*	*	*	*	*	Liquid	Artificial	Nematode growth medium	*	*
596	SR	Article	Soil	Rossbach	2019	10.1016/j.scitotenv.2020.137665	Adaptive tolerance to multigenerational silver nanoparticle (NM300K) exposure by the nematode Caenorhabditis elegans is associated with increased sensitivity to AgNO3	Rossbach et al 2019. Adaptive tolerance to multigenerational silver nanoparticle (NM300K) exposure by the nematode Caenorhabditis elegans is associated with increased sensitivity to AgNO3. Nanotoxicology, 13, 4, 527-542	NM300K	AgNM	JRC	Suspension	Ag	*	*	89.8	Tween	9005-70-3	8% (4% each)	*	16.7	Below 20	*	*	TEM	*	Spheroidal	*	*	*	*	*	*	*	MilliQ Water and 10.2% of Ag in suspension	For 13 mins at 15% amplitude	52.31	Mean	NTA	71.9	74.1	*	-5.5	*	Liquid	Artificial	Nematode growth medium	*	*
597	SR	Article	Soil	Rossbach	2019	10.1016/j.scitotenv.2020.137665	Adaptive tolerance to multigenerational silver nanoparticle (NM300K) exposure by the nematode Caenorhabditis elegans is associated with increased sensitivity to AgNO3	Rossbach et al 2019. Adaptive tolerance to multigenerational silver nanoparticle (NM300K) exposure by the nematode Caenorhabditis elegans is associated with increased sensitivity to AgNO3. Nanotoxicology, 13, 4, 527-542	NM300K	AgNM	JRC	Suspension	Ag	*	*	89.8	Tween	9005-70-3	8% (4% each)	*	16.7	Below 20	*	*	TEM	*	Spheroidal	*	*	*	*	*	*	*	MilliQ Water and 10.2% of Ag in suspension	For 13 mins at 15% amplitude	52.31	Mean	NTA	71.9	74.1	*	-5.5	*	Liquid	Artificial	Nematode growth medium	*	*
598	SR	Article	Soil	McKee	2017	10.3389/fenvs.2017.00019	Collembola reproduction decreases with aging of silver nanoparticles in a sewage sludge treated soil	McKee et al 2017. Collembola reproduction decreases with aging of silver nanoparticles in a sewage sludge treated soil. Frontiers in Environmental Science	NM300K	AgNM	JRC	Suspension	Ag	*	*	89.8	Tween	9005-70-3	8% (4% each)	10.5	15	Below 20	*	*	TEM	38.1	Spheroidal	*	*	*	*	*	*	*	MilliQ Water and 10.2% of Ag in suspension	For 15 mins	40	Mean	DLS	*	*	*	-15	*	Solid	Artificial	RefeSol 01A	Light	12
603	SR	Article	Soil	McKee	2017	10.3389/fenvs.2017.00019	Collembola reproduction decreases with aging of silver nanoparticles in a sewage sludge treated soil	McKee et al 2017. Collembola reproduction decreases with aging of silver nanoparticles in a sewage sludge treated soil. Frontiers in Environmental Science	NM300K	AgNM	JRC	Suspension	Ag	*	*	89.8	Tween	9005-70-3	8% (4% each)	10.5	15	Below 20	*	*	TEM	38.1	Spheroidal	*	*	*	*	*	*	*	MilliQ Water and 10.2% of Ag in suspension	For 15 mins	40	Mean	DLS	*	*	*	-15	*	Solid	Artificial	Lufa soil	Light	12
604	SR	Article	Soil	McKee	2017	10.3389/fenvs.2017.00019	Collembola reproduction decreases with aging of silver nanoparticles in a sewage sludge treated soil	McKee et al 2017. Collembola reproduction decreases with aging of silver nanoparticles in a sewage sludge treated soil. Frontiers in Environmental Science	NM300K	AgNM	JRC	Suspension	Ag	*	*	89.8	Tween	9005-70-3	8% (4% each)	10.5	15	Below 20	*	*	TEM	38.1	Spheroidal	*	*	*	*	*	*	*	MilliQ Water and 10.2% of Ag in suspension	For 15 mins	40	Mean	DLS	*	*	*	-15	*	Solid	Artificial	RefeSol 01A	Light	12
613	SR	Article	Soil	McKee	2017	10.3389/fenvs.2017.00019	Collembola reproduction decreases with aging of silver nanoparticles in a sewage sludge treated soil	McKee et al 2017. Collembola reproduction decreases with aging of silver nanoparticles in a sewage sludge treated soil. Frontiers in Environmental Science	AgNO3		Sigma-Aldrich	Powder	Ag2S	7761-88-8	*	1	*	*	*	*	Unreported	Unreported	*	*	*	*	*	*	*	*	*	*	*	*	*	*	*	*	*	*	*	*	*	*	Solid	Artificial	RefeSol 01A	Light	12
614	SR	Article	Soil	McKee	2017	10.3389/fenvs.2017.00019	Collembola reproduction decreases with aging of silver nanoparticles in a sewage sludge treated soil	McKee et al 2017. Collembola reproduction decreases with aging of silver nanoparticles in a sewage sludge treated soil. Frontiers in Environmental Science	AgNO3		Sigma-Aldrich	Powder	Ag2S	7761-88-8	*	1	*	*	*	*	Unreported	Unreported	*	*	*	*	*	*	*	*	*	*	*	*	*	*	*	*	*	*	*	*	*	*	Solid	Artificial	RefeSol 01A	Light	12
615	SR	Article	Soil	McKee	2017	10.3389/fenvs.2017.00019	Collembola reproduction decreases with aging of silver nanoparticles in a sewage sludge treated soil	McKee et al 2017. Collembola reproduction decreases with aging of silver nanoparticles in a sewage sludge treated soil. Frontiers in Environmental Science	NM300K	AgNM	JRC	Suspension	Ag2S	*	*	89.8	Tween	9005-70-3	8% (4% each)	10.5	15	Below 20	*	*	TEM	38.1	Spheroidal	*	*	*	*	*	*	*	MilliQ Water and 10.2% of Ag in suspension	For 15 mins	40	Mean	DLS	*	*	*	-15	*	Solid	Artificial	RefeSol 01A	Light	12
616	SR	Article	Soil	McKee	2017	10.3389/fenvs.2017.00019	Collembola reproduction decreases with aging of silver nanoparticles in a sewage sludge treated soil	McKee et al 2017. Collembola reproduction decreases with aging of silver nanoparticles in a sewage sludge treated soil. Frontiers in Environmental Science	NM300K	AgNM	JRC	Suspension	Ag2S	*	*	89.8	Tween	9005-70-3	8% (4% each)	10.5	15	Below 20	*	*	TEM	38.1	Spheroidal	*	*	*	*	*	*	*	MilliQ Water and 10.2% of Ag in suspension	For 15 mins	40	Mean	DLS	*	*	*	-15	*	Solid	Artificial	RefeSol 01A	Light	12
617	SR	Article	Soil	McKee	2017	10.3389/fenvs.2017.00019	Collembola reproduction decreases with aging of silver nanoparticles in a sewage sludge treated soil	McKee et al 2017. Collembola reproduction decreases with aging of silver nanoparticles in a sewage sludge treated soil. Frontiers in Environmental Science	NM300K	AgNM	JRC	Suspension	Ag2S	*	*	89.8	Tween	9005-70-3	8% (4% each)	10.5	15	Below 20	*	*	TEM	38.1	Spheroidal	*	*	*	*	*	*	*	MilliQ Water and 10.2% of Ag in suspension	For 15 mins	40	Mean	DLS	*	*	*	-15	*	Solid	Artificial	RefeSol 01A	Light	12
618	SR	Article	Soil	McKee	2017	10.3389/fenvs.2017.00019	Collembola reproduction decreases with aging of silver nanoparticles in a sewage sludge treated soil	McKee et al 2017. Collembola reproduction decreases with aging of silver nanoparticles in a sewage sludge treated soil. Frontiers in Environmental Science	NM300K	AgNM	JRC	Suspension	Ag2S	*	*	89.8	Tween	9005-70-3	8% (4% each)	10.5	15	Below 20	*	*	TEM	38.1	Spheroidal	*	*	*	*	*	*	*	MilliQ Water and 10.2% of Ag in suspension	For 15 mins	40	Mean	DLS	*	*	*	-15	*	Solid	Artificial	RefeSol 01A	Light	12
623	SR	Article	Soil	Hund-Rinke	2019	10.3109/17435390.2015.1054909	Evaluation of microbrial shifts caused by a silver nanomaterial: comparison of four test systems	Hund-Rinke et al 2019. Evaluation of microbrial shifts caused by a silver nanomaterial: comparison of four test systems. Environmental Sciences Europe, 31, 86	NM300K	AgNM	JRC	Suspension	Ag	*	*	89.8	Tween	9005-70-3	8% (4% each)	*	15	Below 20	*	*	TEM	*	Spheroidal	*	*	*	*	TEM	5	*	MilliQ Water and 10.2% of Ag in suspension	Ultrasonic bath	52.31	Mean	NTA	*	*	*	*	*	Solid	Natural media	RefeSol 01A	Dark	*
624	SR	Article	Soil	Hund-Rinke	2019	10.3109/17435390.2015.1054909	Evaluation of microbrial shifts caused by a silver nanomaterial: comparison of four test systems	Hund-Rinke et al 2019. Evaluation of microbrial shifts caused by a silver nanomaterial: comparison of four test systems. Environmental Sciences Europe, 31, 86	NM300K	AgNM	JRC	Suspension	Ag	*	*	89.8	Tween	9005-70-3	8% (4% each)	*	15	Below 20	*	*	TEM	*	Spheroidal	*	*	*	*	TEM	5	*	MilliQ Water and 10.2% of Ag in suspension	Ultrasonic bath	52.31	Mean	NTA	*	*	*	*	*	Solid	Natural media	RefeSol 01A	Dark	*
626	SR	Article	Soil	Hund-Rinke	2019	10.3109/17435390.2015.1054909	Evaluation of microbrial shifts caused by a silver nanomaterial: comparison of four test systems	Hund-Rinke et al 2019. Evaluation of microbrial shifts caused by a silver nanomaterial: comparison of four test systems. Environmental Sciences Europe, 31, 86	NM300K	AgNM	JRC	Suspension	Ag	*	*	89.8	Tween	9005-70-3	8% (4% each)	*	15	Below 20	*	*	TEM	*	Spheroidal	*	*	*	*	TEM	5	*	MilliQ Water and 10.2% of Ag in suspension	Ultrasonic bath	52.31	Mean	NTA	*	*	*	*	*	Solid	Natural media	RefeSol 01A	Dark	*
627	SR	Article	Soil	Hund-Rinke	2019	10.3109/17435390.2015.1054909	Evaluation of microbrial shifts caused by a silver nanomaterial: comparison of four test systems	Hund-Rinke et al 2019. Evaluation of microbrial shifts caused by a silver nanomaterial: comparison of four test systems. Environmental Sciences Europe, 31, 86	NM300K	AgNM	JRC	Suspension	Ag	*	*	89.8	Tween	9005-70-3	8% (4% each)	*	15	Below 20	*	*	TEM	*	Spheroidal	*	*	*	*	TEM	5	*	MilliQ Water and 10.2% of Ag in suspension	Ultrasonic bath	52.31	Mean	NTA	*	*	*	*	*	Solid	Natural media	RefeSol 01A	Dark	*
629	SR	Article	Soil	Hund-Rinke	2019	10.3109/17435390.2015.1054909	Evaluation of microbrial shifts caused by a silver nanomaterial: comparison of four test systems	Hund-Rinke et al 2019. Evaluation of microbrial shifts caused by a silver nanomaterial: comparison of four test systems. Environmental Sciences Europe, 31, 86	NM300K	AgNM	JRC	Suspension	Ag	*	*	89.8	Tween	9005-70-3	8% (4% each)	*	15	Below 20	*	*	TEM	*	Spheroidal	*	*	*	*	TEM	5	*	MilliQ Water and 10.2% of Ag in suspension	Ultrasonic bath	52.31	Mean	NTA	*	*	*	*	*	Solid	Natural media	RefeSol 01A	Dark	*
631	SR	Article	Soil	Hund-Rinke	2019	10.3109/17435390.2015.1054909	Evaluation of microbrial shifts caused by a silver nanomaterial: comparison of four test systems	Hund-Rinke et al 2019. Evaluation of microbrial shifts caused by a silver nanomaterial: comparison of four test systems. Environmental Sciences Europe, 31, 86	NM300K	AgNM	JRC	Suspension	Ag	*	*	89.8	Tween	9005-70-3	8% (4% each)	*	15	Below 20	*	*	TEM	*	Spheroidal	*	*	*	*	TEM	5	*	MilliQ Water and 10.2% of Ag in suspension	Ultrasonic bath	52.31	Mean	NTA	*	*	*	*	*	Solid	Natural media	RefeSol 01A	Dark	*
632	SR	Article	Soil	Hund-Rinke	2019	10.3109/17435390.2015.1054909	Evaluation of microbrial shifts caused by a silver nanomaterial: comparison of four test systems	Hund-Rinke et al 2019. Evaluation of microbrial shifts caused by a silver nanomaterial: comparison of four test systems. Environmental Sciences Europe, 31, 86	NM300K	AgNM	JRC	Suspension	Ag	*	*	89.8	Tween	9005-70-3	8% (4% each)	*	15	Below 20	*	*	TEM	*	Spheroidal	*	*	*	*	TEM	5	*	MilliQ Water and 10.2% of Ag in suspension	Ultrasonic bath	52.31	Mean	NTA	*	*	*	*	*	Solid	Natural media	RefeSol 01A	Dark	*
634	SR	Article	Soil	Hund-Rinke	2019	10.3109/17435390.2015.1054909	Evaluation of microbrial shifts caused by a silver nanomaterial: comparison of four test systems	Hund-Rinke et al 2019. Evaluation of microbrial shifts caused by a silver nanomaterial: comparison of four test systems. Environmental Sciences Europe, 31, 86	NM300K	AgNM	JRC	Suspension	Ag	*	*	89.8	Tween	9005-70-3	8% (4% each)	*	15	Below 20	*	*	TEM	*	Spheroidal	*	*	*	*	TEM	5	*	MilliQ Water and 10.2% of Ag in suspension	Ultrasonic bath	52.31	Mean	NTA	*	*	*	*	*	Solid	Natural media	RefeSol 01A	Dark	*
635	SR	Article	Soil	Hund-Rinke	2019	10.3109/17435390.2015.1054909	Evaluation of microbrial shifts caused by a silver nanomaterial: comparison of four test systems	Hund-Rinke et al 2019. Evaluation of microbrial shifts caused by a silver nanomaterial: comparison of four test systems. Environmental Sciences Europe, 31, 86	NM300K	AgNM	JRC	Suspension	Ag	*	*	89.8	Tween	9005-70-3	8% (4% each)	*	15	Below 20	*	*	TEM	*	Spheroidal	*	*	*	*	TEM	5	*	MilliQ Water and 10.2% of Ag in suspension	Ultrasonic bath	52.31	Mean	NTA	*	*	*	*	*	Solid	Natural media	RefeSol 01A	Dark	*
637	SR	Article	Soil	Hund-Rinke	2019	10.3109/17435390.2015.1054909	Evaluation of microbrial shifts caused by a silver nanomaterial: comparison of four test systems	Hund-Rinke et al 2019. Evaluation of microbrial shifts caused by a silver nanomaterial: comparison of four test systems. Environmental Sciences Europe, 31, 86	NM300K	AgNM	JRC	Suspension	Ag	*	*	89.8	Tween	9005-70-3	8% (4% each)	*	15	Below 20	*	*	TEM	*	Spheroidal	*	*	*	*	TEM	5	*	MilliQ Water and 10.2% of Ag in suspension	Ultrasonic bath	52.31	Mean	NTA	*	*	*	*	*	Solid	Natural media	RefeSol 01A	Dark	*
638	SR	Article	Soil	Hund-Rinke	2019	10.3109/17435390.2015.1054909	Evaluation of microbrial shifts caused by a silver nanomaterial: comparison of four test systems	Hund-Rinke et al 2019. Evaluation of microbrial shifts caused by a silver nanomaterial: comparison of four test systems. Environmental Sciences Europe, 31, 86	NM300K	AgNM	JRC	Suspension	Ag	*	*	89.8	Tween	9005-70-3	8% (4% each)	*	15	Below 20	*	*	TEM	*	Spheroidal	*	*	*	*	TEM	5	*	MilliQ Water and 10.2% of Ag in suspension	Ultrasonic bath	52.31	Mean	NTA	*	*	*	*	*	Solid	Natural media	RefeSol 01A	Dark	*
640	SR	Article	Soil	Hund-Rinke	2019	10.3109/17435390.2015.1054909	Evaluation of microbrial shifts caused by a silver nanomaterial: comparison of four test systems	Hund-Rinke et al 2019. Evaluation of microbrial shifts caused by a silver nanomaterial: comparison of four test systems. Environmental Sciences Europe, 31, 86	NM300K	AgNM	JRC	Suspension	Ag	*	*	89.8	Tween	9005-70-3	8% (4% each)	*	15	Below 20	*	*	TEM	*	Spheroidal	*	*	*	*	TEM	5	*	MilliQ Water and 10.2% of Ag in suspension	Ultrasonic bath	52.31	Mean	NTA	*	*	*	*	*	Solid	Natural media	RefeSol 01A	Dark	*
641	SR	Article	Soil	Hund-Rinke	2019	10.3109/17435390.2015.1054909	Evaluation of microbrial shifts caused by a silver nanomaterial: comparison of four test systems	Hund-Rinke et al 2019. Evaluation of microbrial shifts caused by a silver nanomaterial: comparison of four test systems. Environmental Sciences Europe, 31, 86	NM300K	AgNM	JRC	Suspension	Ag	*	*	89.8	Tween	9005-70-3	8% (4% each)	*	15	Below 20	*	*	TEM	*	Spheroidal	*	*	*	*	TEM	5	*	MilliQ Water and 10.2% of Ag in suspension	Ultrasonic bath	52.31	Mean	NTA	*	*	*	*	*	Solid	Natural media	RefeSol 01A	Dark	*
643	SR	Article	Soil	Hund-Rinke	2019	10.3109/17435390.2015.1054909	Evaluation of microbrial shifts caused by a silver nanomaterial: comparison of four test systems	Hund-Rinke et al 2019. Evaluation of microbrial shifts caused by a silver nanomaterial: comparison of four test systems. Environmental Sciences Europe, 31, 86	NM300K	AgNM	JRC	Suspension	Ag	*	*	89.8	Tween	9005-70-3	8% (4% each)	*	15	Below 20	*	*	TEM	*	Spheroidal	*	*	*	*	TEM	5	*	MilliQ Water and 10.2% of Ag in suspension	Ultrasonic bath	52.31	Mean	NTA	*	*	*	*	*	Solid	Natural media	RefeSol 01A	Dark	*
644	SR	Article	Soil	Hund-Rinke	2019	10.3109/17435390.2015.1054909	Evaluation of microbrial shifts caused by a silver nanomaterial: comparison of four test systems	Hund-Rinke et al 2019. Evaluation of microbrial shifts caused by a silver nanomaterial: comparison of four test systems. Environmental Sciences Europe, 31, 86	NM300K	AgNM	JRC	Suspension	Ag	*	*	89.8	Tween	9005-70-3	8% (4% each)	*	15	Below 20	*	*	TEM	*	Spheroidal	*	*	*	*	TEM	5	*	MilliQ Water and 10.2% of Ag in suspension	Ultrasonic bath	52.31	Mean	NTA	*	*	*	*	*	Solid	Natural media	RefeSol 01A	Dark	*
646	SR	Article	Soil	Hund-Rinke	2019	10.3109/17435390.2015.1054909	Evaluation of microbrial shifts caused by a silver nanomaterial: comparison of four test systems	Hund-Rinke et al 2019. Evaluation of microbrial shifts caused by a silver nanomaterial: comparison of four test systems. Environmental Sciences Europe, 31, 86	NM300K	AgNM	JRC	Suspension	Ag	*	*	89.8	Tween	9005-70-3	8% (4% each)	*	15	Below 20	*	*	TEM	*	Spheroidal	*	*	*	*	TEM	5	*	MilliQ Water and 10.2% of Ag in suspension	Ultrasonic bath	52.31	Mean	NTA	*	*	*	*	*	Solid	Natural media	RefeSol 01A	Dark	*
647	SR	Article	Soil	Hund-Rinke	2019	10.3109/17435390.2015.1054909	Evaluation of microbrial shifts caused by a silver nanomaterial: comparison of four test systems	Hund-Rinke et al 2019. Evaluation of microbrial shifts caused by a silver nanomaterial: comparison of four test systems. Environmental Sciences Europe, 31, 86	NM300K	AgNM	JRC	Suspension	Ag	*	*	89.8	Tween	9005-70-3	8% (4% each)	*	15	Below 20	*	*	TEM	*	Spheroidal	*	*	*	*	TEM	5	*	MilliQ Water and 10.2% of Ag in suspension	Ultrasonic bath	52.31	Mean	NTA	*	*	*	*	*	Solid	Natural media	RefeSol 01A	Dark	*
649	SR	Article	Soil	Hund-Rinke	2019	10.3109/17435390.2015.1054909	Evaluation of microbrial shifts caused by a silver nanomaterial: comparison of four test systems	Hund-Rinke et al 2019. Evaluation of microbrial shifts caused by a silver nanomaterial: comparison of four test systems. Environmental Sciences Europe, 31, 86	NM300K	AgNM	JRC	Suspension	Ag	*	*	89.8	Tween	9005-70-3	8% (4% each)	*	15	Below 20	*	*	TEM	*	Spheroidal	*	*	*	*	TEM	5	*	MilliQ Water and 10.2% of Ag in suspension	Ultrasonic bath	52.31	Mean	NTA	*	*	*	*	*	Solid	Natural media	RefeSol 01A	Dark	*
650	SR	Article	Soil	Hund-Rinke	2019	10.3109/17435390.2015.1054909	Evaluation of microbrial shifts caused by a silver nanomaterial: comparison of four test systems	Hund-Rinke et al 2019. Evaluation of microbrial shifts caused by a silver nanomaterial: comparison of four test systems. Environmental Sciences Europe, 31, 86	NM300K	AgNM	JRC	Suspension	Ag	*	*	89.8	Tween	9005-70-3	8% (4% each)	*	15	Below 20	*	*	TEM	*	Spheroidal	*	*	*	*	TEM	5	*	MilliQ Water and 10.2% of Ag in suspension	Ultrasonic bath	52.31	Mean	NTA	*	*	*	*	*	Solid	Natural media	RefeSol 01A	Dark	*
652	SR	Article	Soil	Hund-Rinke	2019	10.3109/17435390.2015.1054909	Evaluation of microbrial shifts caused by a silver nanomaterial: comparison of four test systems	Hund-Rinke et al 2019. Evaluation of microbrial shifts caused by a silver nanomaterial: comparison of four test systems. Environmental Sciences Europe, 31, 86	NM300K	AgNM	JRC	Suspension	Ag	*	*	89.8	Tween	9005-70-3	8% (4% each)	*	15	Below 20	*	*	TEM	*	Spheroidal	*	*	*	*	TEM	5	*	MilliQ Water and 10.2% of Ag in suspension	Ultrasonic bath	52.31	Mean	NTA	*	*	*	*	*	Solid	Natural media	RefeSol 01A	Dark	*
654	SR	Article	Soil	Hund-Rinke	2019	10.3109/17435390.2015.1054909	Evaluation of microbrial shifts caused by a silver nanomaterial: comparison of four test systems	Hund-Rinke et al 2019. Evaluation of microbrial shifts caused by a silver nanomaterial: comparison of four test systems. Environmental Sciences Europe, 31, 86	NM300K	AgNM	JRC	Suspension	Ag	*	*	89.8	Tween	9005-70-3	8% (4% each)	*	15	Below 20	*	*	TEM	*	Spheroidal	*	*	*	*	TEM	5	*	MilliQ Water and 10.2% of Ag in suspension	Ultrasonic bath	52.31	Mean	NTA	*	*	*	*	*	Solid	Natural media	RefeSol 01A	Dark	*
656	SR	Article	Soil	Hund-Rinke	2019	10.3109/17435390.2015.1054909	Evaluation of microbrial shifts caused by a silver nanomaterial: comparison of four test systems	Hund-Rinke et al 2019. Evaluation of microbrial shifts caused by a silver nanomaterial: comparison of four test systems. Environmental Sciences Europe, 31, 86	NM300K	AgNM	JRC	Suspension	Ag	*	*	89.8	Tween	9005-70-3	8% (4% each)	*	15	Below 20	*	*	TEM	*	Spheroidal	*	*	*	*	TEM	5	*	MilliQ Water and 10.2% of Ag in suspension	Ultrasonic bath	52.31	Mean	NTA	*	*	*	*	*	Solid	Natural media	RefeSol 01A	Dark	*
657	SR	Article	Soil	Hund-Rinke	2019	10.3109/17435390.2015.1054909	Evaluation of microbrial shifts caused by a silver nanomaterial: comparison of four test systems	Hund-Rinke et al 2019. Evaluation of microbrial shifts caused by a silver nanomaterial: comparison of four test systems. Environmental Sciences Europe, 31, 86	NM300K	AgNM	JRC	Suspension	Ag	*	*	89.8	Tween	9005-70-3	8% (4% each)	*	15	Below 20	*	*	TEM	*	Spheroidal	*	*	*	*	TEM	5	*	MilliQ Water and 10.2% of Ag in suspension	Ultrasonic bath	52.31	Mean	NTA	*	*	*	*	*	Solid	Natural media	RefeSol 01A	Dark	*
659	SR	Article	Soil	Hund-Rinke	2019	10.3109/17435390.2015.1054909	Evaluation of microbrial shifts caused by a silver nanomaterial: comparison of four test systems	Hund-Rinke et al 2019. Evaluation of microbrial shifts caused by a silver nanomaterial: comparison of four test systems. Environmental Sciences Europe, 31, 86	NM300K	AgNM	JRC	Suspension	Ag	*	*	89.8	Tween	9005-70-3	8% (4% each)	*	15	Below 20	*	*	TEM	*	Spheroidal	*	*	*	*	TEM	5	*	MilliQ Water and 10.2% of Ag in suspension	Ultrasonic bath	52.31	Mean	NTA	*	*	*	*	*	Solid	Natural media	RefeSol 01A	Dark	*
661	SR	Article	Soil	Hund-Rinke	2019	10.3109/17435390.2015.1054909	Evaluation of microbrial shifts caused by a silver nanomaterial: comparison of four test systems	Hund-Rinke et al 2019. Evaluation of microbrial shifts caused by a silver nanomaterial: comparison of four test systems. Environmental Sciences Europe, 31, 86	NM300K	AgNM	JRC	Suspension	Ag	*	*	89.8	Tween	9005-70-3	8% (4% each)	*	15	Below 20	*	*	TEM	*	Spheroidal	*	*	*	*	TEM	5	*	MilliQ Water and 10.2% of Ag in suspension	Ultrasonic bath	52.31	Mean	NTA	*	*	*	*	*	Solid	Natural media	RefeSol 01A	Dark	*
663	SR	Article	Soil	Hund-Rinke	2019	10.3109/17435390.2015.1054909	Evaluation of microbrial shifts caused by a silver nanomaterial: comparison of four test systems	Hund-Rinke et al 2019. Evaluation of microbrial shifts caused by a silver nanomaterial: comparison of four test systems. Environmental Sciences Europe, 31, 86	NM300K	AgNM	JRC	Suspension	Ag	*	*	89.8	Tween	9005-70-3	8% (4% each)	*	15	Below 20	*	*	TEM	*	Spheroidal	*	*	*	*	TEM	5	*	MilliQ Water and 10.2% of Ag in suspension	Ultrasonic bath	52.31	Mean	NTA	*	*	*	*	*	Solid	Natural media	RefeSol 01A	Dark	*
665	SR	Article	Soil	Hund-Rinke	2019	10.3109/17435390.2015.1054909	Evaluation of microbrial shifts caused by a silver nanomaterial: comparison of four test systems	Hund-Rinke et al 2019. Evaluation of microbrial shifts caused by a silver nanomaterial: comparison of four test systems. Environmental Sciences Europe, 31, 86	NM300K	AgNM	JRC	Suspension	Ag	*	*	89.8	Tween	9005-70-3	8% (4% each)	*	15	Below 20	*	*	TEM	*	Spheroidal	*	*	*	*	TEM	5	*	MilliQ Water and 10.2% of Ag in suspension	Ultrasonic bath	52.31	Mean	NTA	*	*	*	*	*	Solid	Natural media	RefeSol 01A	Dark	*
666	SR	Article	Soil	Hund-Rinke	2019	10.3109/17435390.2015.1054909	Evaluation of microbrial shifts caused by a silver nanomaterial: comparison of four test systems	Hund-Rinke et al 2019. Evaluation of microbrial shifts caused by a silver nanomaterial: comparison of four test systems. Environmental Sciences Europe, 31, 86	NM300K	AgNM	JRC	Suspension	Ag	*	*	89.8	Tween	9005-70-3	8% (4% each)	*	15	Below 20	*	*	TEM	*	Spheroidal	*	*	*	*	TEM	5	*	MilliQ Water and 10.2% of Ag in suspension	Ultrasonic bath	52.31	Mean	NTA	*	*	*	*	*	Solid	Natural media	RefeSol 01A	Dark	*
668	SR	Article	Soil	Hund-Rinke	2019	10.3109/17435390.2015.1054909	Evaluation of microbrial shifts caused by a silver nanomaterial: comparison of four test systems	Hund-Rinke et al 2019. Evaluation of microbrial shifts caused by a silver nanomaterial: comparison of four test systems. Environmental Sciences Europe, 31, 86	NM300K	AgNM	JRC	Suspension	Ag	*	*	89.8	Tween	9005-70-3	8% (4% each)	*	15	Below 20	*	*	TEM	*	Spheroidal	*	*	*	*	TEM	5	*	MilliQ Water and 10.2% of Ag in suspension	Ultrasonic bath	52.31	Mean	NTA	*	*	*	*	*	Solid	Natural media	RefeSol 01A	Dark	*
669	SR	Article	Soil	Hund-Rinke	2019	10.3109/17435390.2015.1054909	Evaluation of microbrial shifts caused by a silver nanomaterial: comparison of four test systems	Hund-Rinke et al 2019. Evaluation of microbrial shifts caused by a silver nanomaterial: comparison of four test systems. Environmental Sciences Europe, 31, 86	NM300K	AgNM	JRC	Suspension	Ag	*	*	89.8	Tween	9005-70-3	8% (4% each)	*	15	Below 20	*	*	TEM	*	Spheroidal	*	*	*	*	TEM	5	*	MilliQ Water and 10.2% of Ag in suspension	Ultrasonic bath	52.31	Mean	NTA	*	*	*	*	*	Solid	Natural media	RefeSol 01A	Dark	*
671	SR	Article	Soil	Hund-Rinke	2019	10.3109/17435390.2015.1054909	Evaluation of microbrial shifts caused by a silver nanomaterial: comparison of four test systems	Hund-Rinke et al 2019. Evaluation of microbrial shifts caused by a silver nanomaterial: comparison of four test systems. Environmental Sciences Europe, 31, 86	NM300K	AgNM	JRC	Suspension	Ag	*	*	89.8	Tween	9005-70-3	8% (4% each)	*	15	Below 20	*	*	TEM	*	Spheroidal	*	*	*	*	TEM	5	*	MilliQ Water and 10.2% of Ag in suspension	Ultrasonic bath	52.31	Mean	NTA	*	*	*	*	*	Solid	Natural media	RefeSol 01A	Dark	*
673	SR	Article	Soil	Hund-Rinke	2019	10.3109/17435390.2015.1054909	Evaluation of microbrial shifts caused by a silver nanomaterial: comparison of four test systems	Hund-Rinke et al 2019. Evaluation of microbrial shifts caused by a silver nanomaterial: comparison of four test systems. Environmental Sciences Europe, 31, 86	NM300K	AgNM	JRC	Suspension	Ag	*	*	89.8	Tween	9005-70-3	8% (4% each)	*	15	Below 20	*	*	TEM	*	Spheroidal	*	*	*	*	TEM	5	*	MilliQ Water and 10.2% of Ag in suspension	Ultrasonic bath	52.31	Mean	NTA	*	*	*	*	*	Solid	Natural media	RefeSol 01A	Dark	*
674	SR	Article	Soil	Hund-Rinke	2019	10.3109/17435390.2015.1054909	Evaluation of microbrial shifts caused by a silver nanomaterial: comparison of four test systems	Hund-Rinke et al 2019. Evaluation of microbrial shifts caused by a silver nanomaterial: comparison of four test systems. Environmental Sciences Europe, 31, 86	NM300K	AgNM	JRC	Suspension	Ag	*	*	89.8	Tween	9005-70-3	8% (4% each)	*	15	Below 20	*	*	TEM	*	Spheroidal	*	*	*	*	TEM	5	*	MilliQ Water and 10.2% of Ag in suspension	Ultrasonic bath	52.31	Mean	NTA	*	*	*	*	*	Solid	Natural media	RefeSol 01A	Dark	*
676	SR	Article	Soil	Hund-Rinke	2019	10.3109/17435390.2015.1054909	Evaluation of microbrial shifts caused by a silver nanomaterial: comparison of four test systems	Hund-Rinke et al 2019. Evaluation of microbrial shifts caused by a silver nanomaterial: comparison of four test systems. Environmental Sciences Europe, 31, 86	NM300K	AgNM	JRC	Suspension	Ag	*	*	89.8	Tween	9005-70-3	8% (4% each)	*	15	Below 20	*	*	TEM	*	Spheroidal	*	*	*	*	TEM	5	*	MilliQ Water and 10.2% of Ag in suspension	Ultrasonic bath	52.31	Mean	NTA	*	*	*	*	*	Solid	Natural media	RefeSol 01A	Dark	*
677	SR	Article	Soil	Hund-Rinke	2019	10.3109/17435390.2015.1054909	Evaluation of microbrial shifts caused by a silver nanomaterial: comparison of four test systems	Hund-Rinke et al 2019. Evaluation of microbrial shifts caused by a silver nanomaterial: comparison of four test systems. Environmental Sciences Europe, 31, 86	NM300K	AgNM	JRC	Suspension	Ag	*	*	89.8	Tween	9005-70-3	8% (4% each)	*	15	Below 20	*	*	TEM	*	Spheroidal	*	*	*	*	TEM	5	*	MilliQ Water and 10.2% of Ag in suspension	Ultrasonic bath	52.31	Mean	NTA	*	*	*	*	*	Solid	Natural media	RefeSol 01A	Dark	*
679	SR	Article	Soil	Hund-Rinke	2019	10.3109/17435390.2015.1054909	Evaluation of microbrial shifts caused by a silver nanomaterial: comparison of four test systems	Hund-Rinke et al 2019. Evaluation of microbrial shifts caused by a silver nanomaterial: comparison of four test systems. Environmental Sciences Europe, 31, 86	NM300K	AgNM	JRC	Suspension	Ag	*	*	89.8	Tween	9005-70-3	8% (4% each)	*	15	Below 20	*	*	TEM	*	Spheroidal	*	*	*	*	TEM	5	*	MilliQ Water and 10.2% of Ag in suspension	Ultrasonic bath	52.31	Mean	NTA	*	*	*	*	*	Solid	Natural media	RefeSol 01A	Dark	*
681	SR	Article	Soil	Hund-Rinke	2019	10.3109/17435390.2015.1054909	Evaluation of microbrial shifts caused by a silver nanomaterial: comparison of four test systems	Hund-Rinke et al 2019. Evaluation of microbrial shifts caused by a silver nanomaterial: comparison of four test systems. Environmental Sciences Europe, 31, 86	NM300K	AgNM	JRC	Suspension	Ag	*	*	89.8	Tween	9005-70-3	8% (4% each)	*	15	Below 20	*	*	TEM	*	Spheroidal	*	*	*	*	TEM	5	*	MilliQ Water and 10.2% of Ag in suspension	Ultrasonic bath	52.31	Mean	NTA	*	*	*	*	*	Solid	Natural media	RefeSol 01A	Dark	*
682	SR	Article	Soil	Hund-Rinke	2019	10.3109/17435390.2015.1054909	Evaluation of microbrial shifts caused by a silver nanomaterial: comparison of four test systems	Hund-Rinke et al 2019. Evaluation of microbrial shifts caused by a silver nanomaterial: comparison of four test systems. Environmental Sciences Europe, 31, 86	NM300K	AgNM	JRC	Suspension	Ag	*	*	89.8	Tween	9005-70-3	8% (4% each)	*	15	Below 20	*	*	TEM	*	Spheroidal	*	*	*	*	TEM	5	*	MilliQ Water and 10.2% of Ag in suspension	Ultrasonic bath	52.31	Mean	NTA	*	*	*	*	*	Solid	Natural media	RefeSol 01A	Dark	*
684	SR	Article	Soil	Hund-Rinke	2019	10.3109/17435390.2015.1054909	Evaluation of microbrial shifts caused by a silver nanomaterial: comparison of four test systems	Hund-Rinke et al 2019. Evaluation of microbrial shifts caused by a silver nanomaterial: comparison of four test systems. Environmental Sciences Europe, 31, 86	NM300K	AgNM	JRC	Suspension	Ag	*	*	89.8	Tween	9005-70-3	8% (4% each)	*	15	Below 20	*	*	TEM	*	Spheroidal	*	*	*	*	TEM	5	*	MilliQ Water and 10.2% of Ag in suspension	Ultrasonic bath	52.31	Mean	NTA	*	*	*	*	*	Solid	Natural media	RefeSol 01A	Dark	*
687	SR	Article	Soil	Hund-Rinke	2019	10.3109/17435390.2015.1054909	Evaluation of microbrial shifts caused by a silver nanomaterial: comparison of four test systems	Hund-Rinke et al 2019. Evaluation of microbrial shifts caused by a silver nanomaterial: comparison of four test systems. Environmental Sciences Europe, 31, 86	NM300K	AgNM	JRC	Suspension	Ag	*	*	89.8	Tween	9005-70-3	8% (4% each)	*	15	Below 20	*	*	TEM	*	Spheroidal	*	*	*	*	TEM	5	*	MilliQ Water and 10.2% of Ag in suspension	Ultrasonic bath	52.31	Mean	NTA	*	*	*	*	*	Solid	Natural media	RefeSol 01A	Dark	*
689	SR	Article	Soil	Hund-Rinke	2019	10.3109/17435390.2015.1054909	Evaluation of microbrial shifts caused by a silver nanomaterial: comparison of four test systems	Hund-Rinke et al 2019. Evaluation of microbrial shifts caused by a silver nanomaterial: comparison of four test systems. Environmental Sciences Europe, 31, 86	NM300K	AgNM	JRC	Suspension	Ag	*	*	89.8	Tween	9005-70-3	8% (4% each)	*	15	Below 20	*	*	TEM	*	Spheroidal	*	*	*	*	TEM	5	*	MilliQ Water and 10.2% of Ag in suspension	Ultrasonic bath	52.31	Mean	NTA	*	*	*	*	*	Solid	Natural media	RefeSol 01A	Dark	*
691	SR	Article	Soil	Hund-Rinke	2019	10.3109/17435390.2015.1054909	Evaluation of microbrial shifts caused by a silver nanomaterial: comparison of four test systems	Hund-Rinke et al 2019. Evaluation of microbrial shifts caused by a silver nanomaterial: comparison of four test systems. Environmental Sciences Europe, 31, 86	NM300K	AgNM	JRC	Suspension	Ag	*	*	89.8	Tween	9005-70-3	8% (4% each)	*	15	Below 20	*	*	TEM	*	Spheroidal	*	*	*	*	TEM	5	*	MilliQ Water and 10.2% of Ag in suspension	Ultrasonic bath	52.31	Mean	NTA	*	*	*	*	*	Solid	Natural media	RefeSol 01A	Dark	*
692	SR	Article	Soil	Hund-Rinke	2019	10.3109/17435390.2015.1054909	Evaluation of microbrial shifts caused by a silver nanomaterial: comparison of four test systems	Hund-Rinke et al 2019. Evaluation of microbrial shifts caused by a silver nanomaterial: comparison of four test systems. Environmental Sciences Europe, 31, 86	NM300K	AgNM	JRC	Suspension	Ag	*	*	89.8	Tween	9005-70-3	8% (4% each)	*	15	Below 20	*	*	TEM	*	Spheroidal	*	*	*	*	TEM	5	*	MilliQ Water and 10.2% of Ag in suspension	Ultrasonic bath	52.31	Mean	NTA	*	*	*	*	*	Solid	Natural media	RefeSol 01A	Dark	*
694	SR	Article	Soil	Hund-Rinke	2019	10.3109/17435390.2015.1054909	Evaluation of microbrial shifts caused by a silver nanomaterial: comparison of four test systems	Hund-Rinke et al 2019. Evaluation of microbrial shifts caused by a silver nanomaterial: comparison of four test systems. Environmental Sciences Europe, 31, 86	NM300K	AgNM	JRC	Suspension	Ag	*	*	89.8	Tween	9005-70-3	8% (4% each)	*	15	Below 20	*	*	TEM	*	Spheroidal	*	*	*	*	TEM	5	*	MilliQ Water and 10.2% of Ag in suspension	Ultrasonic bath	52.31	Mean	NTA	*	*	*	*	*	Solid	Natural media	RefeSol 01A	Dark	*
695	SR	Article	Soil	Hund-Rinke	2019	10.3109/17435390.2015.1054909	Evaluation of microbrial shifts caused by a silver nanomaterial: comparison of four test systems	Hund-Rinke et al 2019. Evaluation of microbrial shifts caused by a silver nanomaterial: comparison of four test systems. Environmental Sciences Europe, 31, 86	NM300K	AgNM	JRC	Suspension	Ag	*	*	89.8	Tween	9005-70-3	8% (4% each)	*	15	Below 20	*	*	TEM	*	Spheroidal	*	*	*	*	TEM	5	*	MilliQ Water and 10.2% of Ag in suspension	Ultrasonic bath	52.31	Mean	NTA	*	*	*	*	*	Solid	Natural media	RefeSol 01A	Dark	*
696	SR	Article	Soil	Hund-Rinke	2019	10.3109/17435390.2015.1054909	Evaluation of microbrial shifts caused by a silver nanomaterial: comparison of four test systems	Hund-Rinke et al 2019. Evaluation of microbrial shifts caused by a silver nanomaterial: comparison of four test systems. Environmental Sciences Europe, 31, 86	NM300K	AgNM	JRC	Suspension	Ag	*	*	89.8	Tween	9005-70-3	8% (4% each)	*	15	Below 20	*	*	TEM	*	Spheroidal	*	*	*	*	TEM	5	*	MilliQ Water and 10.2% of Ag in suspension	Ultrasonic bath	52.31	Mean	NTA	*	*	*	*	*	Solid	Natural media	RefeSol 01A	Dark	*
697	SR	Article	Soil	Hund-Rinke	2019	10.3109/17435390.2015.1054909	Evaluation of microbrial shifts caused by a silver nanomaterial: comparison of four test systems	Hund-Rinke et al 2019. Evaluation of microbrial shifts caused by a silver nanomaterial: comparison of four test systems. Environmental Sciences Europe, 31, 86	NM300K	AgNM	JRC	Suspension	Ag	*	*	89.8	Tween	9005-70-3	8% (4% each)	*	15	Below 20	*	*	TEM	*	Spheroidal	*	*	*	*	TEM	5	*	MilliQ Water and 10.2% of Ag in suspension	Ultrasonic bath	52.31	Mean	NTA	*	*	*	*	*	Solid	Natural media	RefeSol 01A	Dark	*
698	SR	Article	Soil	Hund-Rinke	2019	10.3109/17435390.2015.1054909	Evaluation of microbrial shifts caused by a silver nanomaterial: comparison of four test systems	Hund-Rinke et al 2019. Evaluation of microbrial shifts caused by a silver nanomaterial: comparison of four test systems. Environmental Sciences Europe, 31, 86	NM300K	AgNM	JRC	Suspension	Ag	*	*	89.8	Tween	9005-70-3	8% (4% each)	*	15	Below 20	*	*	TEM	*	Spheroidal	*	*	*	*	TEM	5	*	MilliQ Water and 10.2% of Ag in suspension	Ultrasonic bath	52.31	Mean	NTA	*	*	*	*	*	Solid	Natural media	RefeSol 01A	Dark	*
699	SR	Article	Soil	Hund-Rinke	2019	10.3109/17435390.2015.1054909	Evaluation of microbrial shifts caused by a silver nanomaterial: comparison of four test systems	Hund-Rinke et al 2019. Evaluation of microbrial shifts caused by a silver nanomaterial: comparison of four test systems. Environmental Sciences Europe, 31, 86	NM300K	AgNM	JRC	Suspension	Ag	*	*	89.8	Tween	9005-70-3	8% (4% each)	*	15	Below 20	*	*	TEM	*	Spheroidal	*	*	*	*	TEM	5	*	MilliQ Water and 10.2% of Ag in suspension	Ultrasonic bath	52.31	Mean	NTA	*	*	*	*	*	Solid	Natural media	RefeSol 01A	Dark	*
700	SR	Article	Soil	Rossbach	2021	10.1016/j.ecoenv.2021.112178	Impact of multigenerational exposure to AgNO3 or NM300K Ag NPs on antioxidant defense and oxidative stress in C.elegans	Rossbach et al 2021. Impact of multigenerational exposure to AgNO3 or NM300K Ag NPs on antioxidant defense and oxidative stress in C.elegans. Ecotoxicology and Environmental Safety, 216, 112178	NM300K	AgNM	*	Suspension	Ag	*	*	89.8	Tween	9005-70-3	8% (4% each)	*	23.9	20-50	*	*	TEM	*	Spheroidal	*	*	*	*	*	*	*	MilliQ Water and 10.2% of Ag in suspension	For 13 mins at 15% amplitude	79	Mean	DLS	78.98	235.12	0.285	*	*	Liquid	Artificial	Nematode growth medium	Dark	*
701	SR	Article	Soil	Rossbach	2021	10.1016/j.ecoenv.2021.112178	Impact of multigenerational exposure to AgNO3 or NM300K Ag NPs on antioxidant defense and oxidative stress in C.elegans	Rossbach et al 2021. Impact of multigenerational exposure to AgNO3 or NM300K Ag NPs on antioxidant defense and oxidative stress in C.elegans. Ecotoxicology and Environmental Safety, 216, 112178	NM300K	AgNM	*	Suspension	Ag	*	*	89.8	Tween	9005-70-3	8% (4% each)	*	23.9	20-50	*	*	TEM	*	Spheroidal	*	*	*	*	*	*	*	MilliQ Water and 10.2% of Ag in suspension	For 13 mins at 15% amplitude	79	Mean	DLS	78.98	235.12	0.285	*	*	Liquid	Artificial	Nematode growth medium	Dark	*
702	SR	Article	Soil	Rossbach	2021	10.1016/j.ecoenv.2021.112178	Impact of multigenerational exposure to AgNO3 or NM300K Ag NPs on antioxidant defense and oxidative stress in C.elegans	Rossbach et al 2021. Impact of multigenerational exposure to AgNO3 or NM300K Ag NPs on antioxidant defense and oxidative stress in C.elegans. Ecotoxicology and Environmental Safety, 216, 112178	AgNO3		*	*	Ag	7761-88-8	*	*	*	*	*	*	Unreported	Unreported	*	*	*	*	*	*	*	*	*	*	*	*	*	*	*	*	*	*	*	*	*	*	Liquid	Artificial	Nematode growth medium	Dark	*
705	SR	Article	Soil	McKee	2018	10.3390/ijerph15040652	Is a water content of 60% maximum water holding capacity suitable for folsomia candida reproduction tests? a study with silver nanoparticles and AgNO3	McKee et al 2018 Is a water content of 60% maximum water holding capacity suitable for folsomia candida reproduction tests? a study with silver nanoparticles and AgNO3. International Journal of Environmental Research and Public Health, 15, 652	NM300K	AgNM	JRC	Suspension	Ag	*	*	89.8	Tween	9005-70-3	8% (4% each)	*	15	Below 20	*	*	TEM	*	Spheroidal	*	*	*	*	*	*	*	MilliQ Water and 10.2% of Ag in suspension	Ultrasonic bath for 15 mins	40	Mean	DLS	30	60	*	-15	7	Solid	Artificial	OECD soil	Light	12
707	SR	Article	Soil	McKee	2018	10.3390/ijerph15040652	Is a water content of 60% maximum water holding capacity suitable for folsomia candida reproduction tests? a study with silver nanoparticles and AgNO3	McKee et al 2018 Is a water content of 60% maximum water holding capacity suitable for folsomia candida reproduction tests? a study with silver nanoparticles and AgNO3. International Journal of Environmental Research and Public Health, 15, 652	NM300K	AgNM	JRC	Suspension	Ag	*	*	89.8	Tween	9005-70-3	8% (4% each)	*	15	Below 20	*	*	TEM	*	Spheroidal	*	*	*	*	*	*	*	MilliQ Water and 10.2% of Ag in suspension	Ultrasonic bath for 15 mins	40	Mean	DLS	30	60	*	-15	7	Solid	Artificial	OECD soil	Light	12
709	SR	Article	Soil	Grun	2018	10.1016/j.jes.2018.04.013	Long-term effects of environmentally relevant concentrations of silver nanoparticles on microbial biomass, enzyme activity, and functional genes involved in the nitrogen cycle of loamy soil	Grun et al 2018. Long-term effects of environmentally relevant concentrations of silver nanoparticles on microbial biomass, enzyme activity, and functional genes involved in the nitrogen cycle of loamy soil. Journal of Environmental Sciences, 69, 12-22	AgNO3		*	*	Ag	7761-88-8	*	*	*	*	*	*	Unreported	Unreported	*	*	*	*	*	*	*	*	*	*	*	*	*	*	*	*	*	*	*	*	*	*	Solid	Artificial	Haplic Stagno-Luvisol	Dark	*
710	SR	Article	Soil	Grun	2018	10.1016/j.jes.2018.04.013	Long-term effects of environmentally relevant concentrations of silver nanoparticles on microbial biomass, enzyme activity, and functional genes involved in the nitrogen cycle of loamy soil	Grun et al 2018. Long-term effects of environmentally relevant concentrations of silver nanoparticles on microbial biomass, enzyme activity, and functional genes involved in the nitrogen cycle of loamy soil. Journal of Environmental Sciences, 69, 12-22	AgNO3		*	*	Ag	7761-88-8	*	*	*	*	*	*	Unreported	Unreported	*	*	*	*	*	*	*	*	*	*	*	*	*	*	*	*	*	*	*	*	*	*	Solid	Artificial	Haplic Stagno-Luvisol	Dark	*
713	SR	Article	Soil	Grun	2018	10.1016/j.jes.2018.04.013	Long-term effects of environmentally relevant concentrations of silver nanoparticles on microbial biomass, enzyme activity, and functional genes involved in the nitrogen cycle of loamy soil	Grun et al 2018. Long-term effects of environmentally relevant concentrations of silver nanoparticles on microbial biomass, enzyme activity, and functional genes involved in the nitrogen cycle of loamy soil. Journal of Environmental Sciences, 69, 12-22	AgNM	AgNM	Ras Materials	Suspension	Ag	*	10	*	Tween-NH4NO3-acrylic	9005-70-3 and 6484-52-2 and 9003-04-7	8% (4% each) and 7.5% ammonium nitrate	*	20	20-50	*	*	TEM	*	Spheroidal	*	*	*	*	*	*	*	MilliQ water	*	*	*	*	*	*	*	*	*	Solid	Artificial	Haplic Stagno-Luvisol	Dark	*
716	SR	Article	Soil	Grun	2018	10.1016/j.jes.2018.04.013	Long-term effects of environmentally relevant concentrations of silver nanoparticles on microbial biomass, enzyme activity, and functional genes involved in the nitrogen cycle of loamy soil	Grun et al 2018. Long-term effects of environmentally relevant concentrations of silver nanoparticles on microbial biomass, enzyme activity, and functional genes involved in the nitrogen cycle of loamy soil. Journal of Environmental Sciences, 69, 12-22	AgNM	AgNM	Ras Materials	Suspension	Ag	*	10	*	Tween-NH4NO3-acrylic	9005-70-3 and 6484-52-2 and 9003-04-7	8% (4% each) and 7.5% ammonium nitrate	*	20	20-50	*	*	TEM	*	Spheroidal	*	*	*	*	*	*	*	MilliQ water	*	*	*	*	*	*	*	*	*	Solid	Artificial	Haplic Stagno-Luvisol	Dark	*
721	SR	Article	Soil	Grun	2018	10.1016/j.jes.2018.04.013	Long-term effects of environmentally relevant concentrations of silver nanoparticles on microbial biomass, enzyme activity, and functional genes involved in the nitrogen cycle of loamy soil	Grun et al 2018. Long-term effects of environmentally relevant concentrations of silver nanoparticles on microbial biomass, enzyme activity, and functional genes involved in the nitrogen cycle of loamy soil. Journal of Environmental Sciences, 69, 12-22	AgNO3		*	*	Ag	7761-88-8	*	*	*	*	*	*	Unreported	Unreported	*	*	*	*	*	*	*	*	*	*	*	*	*	*	*	*	*	*	*	*	*	*	Solid	Artificial	Haplic Stagno-Luvisol	Dark	*
722	SR	Article	Soil	Grun	2018	10.1016/j.jes.2018.04.013	Long-term effects of environmentally relevant concentrations of silver nanoparticles on microbial biomass, enzyme activity, and functional genes involved in the nitrogen cycle of loamy soil	Grun et al 2018. Long-term effects of environmentally relevant concentrations of silver nanoparticles on microbial biomass, enzyme activity, and functional genes involved in the nitrogen cycle of loamy soil. Journal of Environmental Sciences, 69, 12-22	AgNO3		*	*	Ag	7761-88-8	*	*	*	*	*	*	Unreported	Unreported	*	*	*	*	*	*	*	*	*	*	*	*	*	*	*	*	*	*	*	*	*	*	Solid	Artificial	Haplic Stagno-Luvisol	Dark	*
727	SR	Article	Soil	Grun	2018	10.1016/j.jes.2018.04.013	Long-term effects of environmentally relevant concentrations of silver nanoparticles on microbial biomass, enzyme activity, and functional genes involved in the nitrogen cycle of loamy soil	Grun et al 2018. Long-term effects of environmentally relevant concentrations of silver nanoparticles on microbial biomass, enzyme activity, and functional genes involved in the nitrogen cycle of loamy soil. Journal of Environmental Sciences, 69, 12-22	AgNO3		*	*	Ag	7761-88-8	*	*	*	*	*	*	Unreported	Unreported	*	*	*	*	*	*	*	*	*	*	*	*	*	*	*	*	*	*	*	*	*	*	Solid	Artificial	Haplic Stagno-Luvisol	Dark	*
728	SR	Article	Soil	Grun	2018	10.1016/j.jes.2018.04.013	Long-term effects of environmentally relevant concentrations of silver nanoparticles on microbial biomass, enzyme activity, and functional genes involved in the nitrogen cycle of loamy soil	Grun et al 2018. Long-term effects of environmentally relevant concentrations of silver nanoparticles on microbial biomass, enzyme activity, and functional genes involved in the nitrogen cycle of loamy soil. Journal of Environmental Sciences, 69, 12-22	AgNO3		*	*	Ag	7761-88-8	*	*	*	*	*	*	Unreported	Unreported	*	*	*	*	*	*	*	*	*	*	*	*	*	*	*	*	*	*	*	*	*	*	Solid	Artificial	Haplic Stagno-Luvisol	Dark	*
729	SR	Article	Soil	Grun	2018	10.1016/j.jes.2018.04.013	Long-term effects of environmentally relevant concentrations of silver nanoparticles on microbial biomass, enzyme activity, and functional genes involved in the nitrogen cycle of loamy soil	Grun et al 2018. Long-term effects of environmentally relevant concentrations of silver nanoparticles on microbial biomass, enzyme activity, and functional genes involved in the nitrogen cycle of loamy soil. Journal of Environmental Sciences, 69, 12-22	AgNO3		*	*	Ag	7761-88-8	*	*	*	*	*	*	Unreported	Unreported	*	*	*	*	*	*	*	*	*	*	*	*	*	*	*	*	*	*	*	*	*	*	Solid	Artificial	Haplic Stagno-Luvisol	Dark	*
732	SR	Article	Soil	Grun	2018	10.1016/j.jes.2018.04.013	Long-term effects of environmentally relevant concentrations of silver nanoparticles on microbial biomass, enzyme activity, and functional genes involved in the nitrogen cycle of loamy soil	Grun et al 2018. Long-term effects of environmentally relevant concentrations of silver nanoparticles on microbial biomass, enzyme activity, and functional genes involved in the nitrogen cycle of loamy soil. Journal of Environmental Sciences, 69, 12-22	AgNM	AgNM	Ras Materials	Suspension	Ag	*	10	*	Tween-NH4NO3-acrylic	9005-70-3 and 6484-52-2 and 9003-04-7	8% (4% each) and 7.5% ammonium nitrate	*	20	20-50	*	*	TEM	*	Spheroidal	*	*	*	*	*	*	*	MilliQ water	*	*	*	*	*	*	*	*	*	Solid	Artificial	Haplic Stagno-Luvisol	Dark	*
735	SR	Article	Soil	Grun	2018	10.1016/j.jes.2018.04.013	Long-term effects of environmentally relevant concentrations of silver nanoparticles on microbial biomass, enzyme activity, and functional genes involved in the nitrogen cycle of loamy soil	Grun et al 2018. Long-term effects of environmentally relevant concentrations of silver nanoparticles on microbial biomass, enzyme activity, and functional genes involved in the nitrogen cycle of loamy soil. Journal of Environmental Sciences, 69, 12-22	AgNM	AgNM	Ras Materials	Suspension	Ag	*	10	*	Tween-NH4NO3-acrylic	9005-70-3 and 6484-52-2 and 9003-04-7	8% (4% each) and 7.5% ammonium nitrate	*	20	20-50	*	*	TEM	*	Spheroidal	*	*	*	*	*	*	*	MilliQ water	*	*	*	*	*	*	*	*	*	Solid	Artificial	Haplic Stagno-Luvisol	Dark	*
736	SR	Article	Soil	Grun	2018	10.1016/j.jes.2018.04.013	Long-term effects of environmentally relevant concentrations of silver nanoparticles on microbial biomass, enzyme activity, and functional genes involved in the nitrogen cycle of loamy soil	Grun et al 2018. Long-term effects of environmentally relevant concentrations of silver nanoparticles on microbial biomass, enzyme activity, and functional genes involved in the nitrogen cycle of loamy soil. Journal of Environmental Sciences, 69, 12-22	AgNM	AgNM	Ras Materials	Suspension	Ag	*	10	*	Tween-NH4NO3-acrylic	9005-70-3 and 6484-52-2 and 9003-04-7	8% (4% each) and 7.5% ammonium nitrate	*	20	20-50	*	*	TEM	*	Spheroidal	*	*	*	*	*	*	*	MilliQ water	*	*	*	*	*	*	*	*	*	Solid	Artificial	Haplic Stagno-Luvisol	Dark	*
741	SR	Article	Soil	Grun	2018	10.1016/j.jes.2018.04.013	Long-term effects of environmentally relevant concentrations of silver nanoparticles on microbial biomass, enzyme activity, and functional genes involved in the nitrogen cycle of loamy soil	Grun et al 2018. Long-term effects of environmentally relevant concentrations of silver nanoparticles on microbial biomass, enzyme activity, and functional genes involved in the nitrogen cycle of loamy soil. Journal of Environmental Sciences, 69, 12-22	AgNO3		*	*	Ag	7761-88-8	*	*	*	*	*	*	Unreported	Unreported	*	*	*	*	*	*	*	*	*	*	*	*	*	*	*	*	*	*	*	*	*	*	Solid	Artificial	Haplic Stagno-Luvisol	Dark	*
742	SR	Article	Soil	Grun	2018	10.1016/j.jes.2018.04.013	Long-term effects of environmentally relevant concentrations of silver nanoparticles on microbial biomass, enzyme activity, and functional genes involved in the nitrogen cycle of loamy soil	Grun et al 2018. Long-term effects of environmentally relevant concentrations of silver nanoparticles on microbial biomass, enzyme activity, and functional genes involved in the nitrogen cycle of loamy soil. Journal of Environmental Sciences, 69, 12-22	AgNO3		*	*	Ag	7761-88-8	*	*	*	*	*	*	Unreported	Unreported	*	*	*	*	*	*	*	*	*	*	*	*	*	*	*	*	*	*	*	*	*	*	Solid	Artificial	Haplic Stagno-Luvisol	Dark	*
743	SR	Article	Soil	Grun	2018	10.1016/j.jes.2018.04.013	Long-term effects of environmentally relevant concentrations of silver nanoparticles on microbial biomass, enzyme activity, and functional genes involved in the nitrogen cycle of loamy soil	Grun et al 2018. Long-term effects of environmentally relevant concentrations of silver nanoparticles on microbial biomass, enzyme activity, and functional genes involved in the nitrogen cycle of loamy soil. Journal of Environmental Sciences, 69, 12-22	AgNO3		*	*	Ag	7761-88-8	*	*	*	*	*	*	Unreported	Unreported	*	*	*	*	*	*	*	*	*	*	*	*	*	*	*	*	*	*	*	*	*	*	Solid	Artificial	Haplic Stagno-Luvisol	Dark	*
747	SR	Article	Soil	Grun	2018	10.1016/j.jes.2018.04.013	Long-term effects of environmentally relevant concentrations of silver nanoparticles on microbial biomass, enzyme activity, and functional genes involved in the nitrogen cycle of loamy soil	Grun et al 2018. Long-term effects of environmentally relevant concentrations of silver nanoparticles on microbial biomass, enzyme activity, and functional genes involved in the nitrogen cycle of loamy soil. Journal of Environmental Sciences, 69, 12-22	AgNO3		*	*	Ag	7761-88-8	*	*	*	*	*	*	Unreported	Unreported	*	*	*	*	*	*	*	*	*	*	*	*	*	*	*	*	*	*	*	*	*	*	Solid	Artificial	Haplic Stagno-Luvisol	Dark	*
748	SR	Article	Soil	Grun	2018	10.1016/j.jes.2018.04.013	Long-term effects of environmentally relevant concentrations of silver nanoparticles on microbial biomass, enzyme activity, and functional genes involved in the nitrogen cycle of loamy soil	Grun et al 2018. Long-term effects of environmentally relevant concentrations of silver nanoparticles on microbial biomass, enzyme activity, and functional genes involved in the nitrogen cycle of loamy soil. Journal of Environmental Sciences, 69, 12-22	AgNO3		*	*	Ag	7761-88-8	*	*	*	*	*	*	Unreported	Unreported	*	*	*	*	*	*	*	*	*	*	*	*	*	*	*	*	*	*	*	*	*	*	Solid	Artificial	Haplic Stagno-Luvisol	Dark	*
749	SR	Article	Soil	Grun	2018	10.1016/j.jes.2018.04.013	Long-term effects of environmentally relevant concentrations of silver nanoparticles on microbial biomass, enzyme activity, and functional genes involved in the nitrogen cycle of loamy soil	Grun et al 2018. Long-term effects of environmentally relevant concentrations of silver nanoparticles on microbial biomass, enzyme activity, and functional genes involved in the nitrogen cycle of loamy soil. Journal of Environmental Sciences, 69, 12-22	AgNO3		*	*	Ag	7761-88-8	*	*	*	*	*	*	Unreported	Unreported	*	*	*	*	*	*	*	*	*	*	*	*	*	*	*	*	*	*	*	*	*	*	Solid	Artificial	Haplic Stagno-Luvisol	Dark	*
752	SR	Article	Soil	Grun	2018	10.1016/j.jes.2018.04.013	Long-term effects of environmentally relevant concentrations of silver nanoparticles on microbial biomass, enzyme activity, and functional genes involved in the nitrogen cycle of loamy soil	Grun et al 2018. Long-term effects of environmentally relevant concentrations of silver nanoparticles on microbial biomass, enzyme activity, and functional genes involved in the nitrogen cycle of loamy soil. Journal of Environmental Sciences, 69, 12-22	AgNM	AgNM	Ras Materials	Suspension	Ag	*	10	*	Tween-NH4NO3-acrylic	9005-70-3 and 6484-52-2 and 9003-04-7	8% (4% each) and 7.5% ammonium nitrate	*	20	20-50	*	*	TEM	*	Spheroidal	*	*	*	*	*	*	*	MilliQ water	*	*	*	*	*	*	*	*	*	Solid	Artificial	Haplic Stagno-Luvisol	Dark	*
754	SR	Article	Soil	McKee	2019	10.1016/j.scitotenv.2019.03.493	A new test system for unraveling the effects of soil components on the uptake and toxicity of silver nanoparticles (NM300K) in simulated pore water	McKee et al 2019 A new test system for unraveling the effects of soil components on the uptake and toxicity of silver nanoparticles (NM300K) in simulated pore water. International Journal of Environmental Research and Public Health, 15, 652	NM300K	AgNM	JRC	Suspension	Ag	*	*	89.8	Tween	9005-70-3	8% (4% each)	*	15	Below 20	*	*	TEM	*	Spheroidal	*	*	*	*	*	*	*	MilliQ Water and 10.2% of Ag in suspension	Ultrasonic bath for 15 mins	40	Mean	DLS	30	60	*	-15	7	Solid	Artificial	OECD soil	Dark	*
755	SR	Article	Soil	McKee	2019	10.1016/j.scitotenv.2019.03.493	A new test system for unraveling the effects of soil components on the uptake and toxicity of silver nanoparticles (NM300K) in simulated pore water	McKee et al 2019 A new test system for unraveling the effects of soil components on the uptake and toxicity of silver nanoparticles (NM300K) in simulated pore water. International Journal of Environmental Research and Public Health, 15, 652	NM300K	AgNM	JRC	Suspension	Ag	*	*	89.8	Tween	9005-70-3	8% (4% each)	*	15	Below 20	*	*	TEM	*	Spheroidal	*	*	*	*	*	*	*	MilliQ Water and 10.2% of Ag in suspension	Ultrasonic bath for 15 mins	40	Mean	DLS	30	60	*	-15	7	Liquid	*	*	Dark	*
756	SR	Article	Soil	McKee	2019	10.1016/j.scitotenv.2019.03.493	A new test system for unraveling the effects of soil components on the uptake and toxicity of silver nanoparticles (NM300K) in simulated pore water	McKee et al 2019 A new test system for unraveling the effects of soil components on the uptake and toxicity of silver nanoparticles (NM300K) in simulated pore water. International Journal of Environmental Research and Public Health, 15, 652	NM300K	AgNM	JRC	Suspension	Ag	*	*	89.8	Tween	9005-70-3	8% (4% each)	*	15	Below 20	*	*	TEM	*	Spheroidal	*	*	*	*	*	*	*	MilliQ Water and 10.2% of Ag in suspension	Ultrasonic bath for 15 mins	40	Mean	DLS	30	60	*	-15	7	Liquid	*	*	Dark	*
757	SR	Article	Soil	McKee	2019	10.1016/j.scitotenv.2019.03.493	A new test system for unraveling the effects of soil components on the uptake and toxicity of silver nanoparticles (NM300K) in simulated pore water	McKee et al 2019 A new test system for unraveling the effects of soil components on the uptake and toxicity of silver nanoparticles (NM300K) in simulated pore water. International Journal of Environmental Research and Public Health, 15, 652	NM300K	AgNM	JRC	Suspension	Ag	*	*	89.8	Tween	9005-70-3	8% (4% each)	*	15	Below 20	*	*	TEM	*	Spheroidal	*	*	*	*	*	*	*	MilliQ Water and 10.2% of Ag in suspension	Ultrasonic bath for 15 mins	40	Mean	DLS	30	60	*	-15	7	Solid	Artificial	OECD soil	Dark	*
758	SR	Article	Soil	McKee	2019	10.1016/j.scitotenv.2019.03.493	A new test system for unraveling the effects of soil components on the uptake and toxicity of silver nanoparticles (NM300K) in simulated pore water	McKee et al 2019 A new test system for unraveling the effects of soil components on the uptake and toxicity of silver nanoparticles (NM300K) in simulated pore water. International Journal of Environmental Research and Public Health, 15, 652	NM300K	AgNM	JRC	Suspension	Ag	*	*	89.8	Tween	9005-70-3	8% (4% each)	*	15	Below 20	*	*	TEM	*	Spheroidal	*	*	*	*	*	*	*	MilliQ Water and 10.2% of Ag in suspension	Ultrasonic bath for 15 mins	40	Mean	DLS	30	60	*	-15	7	Solid	Artificial	OECD soil	Dark	*
779	SR	Article	Soil	Courtois	2021	10.1016/j.chemosphere.2020.128761	Medium-term effects of Ag supplied directly or via sewage sludge to an agricultural soil on Eisenia fetida earthworm and soil microbial communities	Courtois et al 2021. Medium-term effects of Ag supplied directly or via sewage sludge to an agricultural soil on Eisenia fetida earthworm and soil microbial communities. Chemosphere, 269, 128761	NM300K	AgNM	JRC	Suspension	Ag	*	*	89.8	Tween	9005-70-3	8% (4% each)	*	15	Below 20	*	*	TEM	*	Spheroidal	*	*	*	17	TEM	*	5	MilliQ Water and 10.2% of Ag in suspension	*	52.31	Mean	NTA	*	*	*	*	*	Solid	Natural media	*	*	*
780	SR	Article	Soil	Courtois	2021	10.1016/j.chemosphere.2020.128761	Medium-term effects of Ag supplied directly or via sewage sludge to an agricultural soil on Eisenia fetida earthworm and soil microbial communities	Courtois et al 2021. Medium-term effects of Ag supplied directly or via sewage sludge to an agricultural soil on Eisenia fetida earthworm and soil microbial communities. Chemosphere, 269, 128761	AgNO3		*	Powder	Ag	7761-88-8	*	*	*	*	*	*	Unreported	Unreported	*	*	*	*	*	*	*	*	*	*	*	*	*	*	*	*	*	*	*	*	*	*	Solid	Natural media	*	*	*
781	SR	Article	Soil	Courtois	2021	10.1016/j.chemosphere.2020.128761	Medium-term effects of Ag supplied directly or via sewage sludge to an agricultural soil on Eisenia fetida earthworm and soil microbial communities	Courtois et al 2021. Medium-term effects of Ag supplied directly or via sewage sludge to an agricultural soil on Eisenia fetida earthworm and soil microbial communities. Chemosphere, 269, 128761	NM300K	AgNM	JRC	Suspension	Ag2S	*	*	89.8	Tween	9005-70-3	8% (4% each)	*	15	Below 20	*	*	TEM	*	Spheroidal	*	*	*	17	TEM	*	5	MilliQ Water and 10.2% of Ag in suspension	*	52.31	Mean	NTA	*	*	*	*	*	Solid	Natural media	*	*	*
782	SR	Article	Soil	Courtois	2021	10.1016/j.chemosphere.2020.128761	Medium-term effects of Ag supplied directly or via sewage sludge to an agricultural soil on Eisenia fetida earthworm and soil microbial communities	Courtois et al 2021. Medium-term effects of Ag supplied directly or via sewage sludge to an agricultural soil on Eisenia fetida earthworm and soil microbial communities. Chemosphere, 269, 128761	AgNO3		*	Powder	Ag2S	7761-88-8	*	*	*	*	*	*	Unreported	Unreported	*	*	*	*	*	*	*	*	*	*	*	*	*	*	*	*	*	*	*	*	*	*	Solid	Natural media	*	*	*
783	SR	Article	Soil	Schlich	2015	10.1016/j.envpol.2014.10.021	Influence of soil properties on the effect of silver nanomaterials on microbial activity in five soils	Schlich et al 2015. Influence of soil properties on the effect of silver nanomaterials on microbial activity in five soils. Environmental Pollution, 196, 321-330	NM300K	AgNM	JRC	Suspension	Ag	*	*	89.8	Tween	9005-70-3	8% (4% each)	*	15	Below 20	*	*	TEM	*	Spheroidal	*	*	*	*	TEM	5	*	MilliQ Water and 10.2% of Ag in suspension	*	52.31	Mean	NTA	*	*	*	*	*	Solid	Artificial	RefeSol 05G	Dark	*
784	SR	Article	Soil	Schlich	2015	10.1016/j.envpol.2014.10.021	Influence of soil properties on the effect of silver nanomaterials on microbial activity in five soils	Schlich et al 2015. Influence of soil properties on the effect of silver nanomaterials on microbial activity in five soils. Environmental Pollution, 196, 321-330	NM300K	AgNM	JRC	Suspension	Ag	*	*	89.8	Tween	9005-70-3	8% (4% each)	*	15	Below 20	*	*	TEM	*	Spheroidal	*	*	*	*	TEM	5	*	MilliQ Water and 10.2% of Ag in suspension	*	52.31	Mean	NTA	*	*	*	*	*	Solid	Artificial	RefeSol 05G	Dark	*
785	SR	Article	Soil	Schlich	2015	10.1016/j.envpol.2014.10.021	Influence of soil properties on the effect of silver nanomaterials on microbial activity in five soils	Schlich et al 2015. Influence of soil properties on the effect of silver nanomaterials on microbial activity in five soils. Environmental Pollution, 196, 321-330	AgNO3		Merck KGaA	*	Ag	7761-88-8	*	*	*	*	*	*	Unreported	Unreported	*	*	*	*	*	*	*	*	*	*	*	*	*	*	*	*	*	*	*	*	*	*	Solid	Artificial	RefeSol 01A	Dark	*
786	SR	Article	Soil	Schlich	2015	10.1016/j.envpol.2014.10.021	Influence of soil properties on the effect of silver nanomaterials on microbial activity in five soils	Schlich et al 2015. Influence of soil properties on the effect of silver nanomaterials on microbial activity in five soils. Environmental Pollution, 196, 321-330	AgNO3		Merck KGaA	*	Ag	7761-88-8	*	*	*	*	*	*	Unreported	Unreported	*	*	*	*	*	*	*	*	*	*	*	*	*	*	*	*	*	*	*	*	*	*	Solid	Artificial	RefeSol 01A	Dark	*
787	SR	Article	Soil	Schlich	2015	10.1016/j.envpol.2014.10.021	Influence of soil properties on the effect of silver nanomaterials on microbial activity in five soils	Schlich et al 2015. Influence of soil properties on the effect of silver nanomaterials on microbial activity in five soils. Environmental Pollution, 196, 321-330	AgNO3		Merck KGaA	*	Ag	7761-88-8	*	*	*	*	*	*	Unreported	Unreported	*	*	*	*	*	*	*	*	*	*	*	*	*	*	*	*	*	*	*	*	*	*	Solid	Artificial	RefeSol 02A	Dark	*
788	SR	Article	Soil	Schlich	2015	10.1016/j.envpol.2014.10.021	Influence of soil properties on the effect of silver nanomaterials on microbial activity in five soils	Schlich et al 2015. Influence of soil properties on the effect of silver nanomaterials on microbial activity in five soils. Environmental Pollution, 196, 321-330	AgNO3		Merck KGaA	*	Ag	7761-88-8	*	*	*	*	*	*	Unreported	Unreported	*	*	*	*	*	*	*	*	*	*	*	*	*	*	*	*	*	*	*	*	*	*	Solid	Artificial	RefeSol 02A	Dark	*
789	SR	Article	Soil	Schlich	2015	10.1016/j.envpol.2014.10.021	Influence of soil properties on the effect of silver nanomaterials on microbial activity in five soils	Schlich et al 2015. Influence of soil properties on the effect of silver nanomaterials on microbial activity in five soils. Environmental Pollution, 196, 321-330	AgNO3		Merck KGaA	*	Ag	7761-88-8	*	*	*	*	*	*	Unreported	Unreported	*	*	*	*	*	*	*	*	*	*	*	*	*	*	*	*	*	*	*	*	*	*	Solid	Artificial	RefeSol 04A	Dark	*
790	SR	Article	Soil	Schlich	2015	10.1016/j.envpol.2014.10.021	Influence of soil properties on the effect of silver nanomaterials on microbial activity in five soils	Schlich et al 2015. Influence of soil properties on the effect of silver nanomaterials on microbial activity in five soils. Environmental Pollution, 196, 321-330	AgNO3		Merck KGaA	*	Ag	7761-88-8	*	*	*	*	*	*	Unreported	Unreported	*	*	*	*	*	*	*	*	*	*	*	*	*	*	*	*	*	*	*	*	*	*	Solid	Artificial	RefeSol 04A	Dark	*
791	SR	Article	Soil	Schlich	2015	10.1016/j.envpol.2014.10.021	Influence of soil properties on the effect of silver nanomaterials on microbial activity in five soils	Schlich et al 2015. Influence of soil properties on the effect of silver nanomaterials on microbial activity in five soils. Environmental Pollution, 196, 321-330	AgNO3		Merck KGaA	*	Ag	7761-88-8	*	*	*	*	*	*	Unreported	Unreported	*	*	*	*	*	*	*	*	*	*	*	*	*	*	*	*	*	*	*	*	*	*	Solid	Artificial	RefeSol 03G	Dark	*
792	SR	Article	Soil	Schlich	2015	10.1016/j.envpol.2014.10.021	Influence of soil properties on the effect of silver nanomaterials on microbial activity in five soils	Schlich et al 2015. Influence of soil properties on the effect of silver nanomaterials on microbial activity in five soils. Environmental Pollution, 196, 321-330	AgNO3		Merck KGaA	*	Ag	7761-88-8	*	*	*	*	*	*	Unreported	Unreported	*	*	*	*	*	*	*	*	*	*	*	*	*	*	*	*	*	*	*	*	*	*	Solid	Artificial	RefeSol 03G	Dark	*
793	SR	Article	Soil	Schlich	2015	10.1016/j.envpol.2014.10.021	Influence of soil properties on the effect of silver nanomaterials on microbial activity in five soils	Schlich et al 2015. Influence of soil properties on the effect of silver nanomaterials on microbial activity in five soils. Environmental Pollution, 196, 321-330	AgNO3		Merck KGaA	*	Ag	7761-88-8	*	*	*	*	*	*	Unreported	Unreported	*	*	*	*	*	*	*	*	*	*	*	*	*	*	*	*	*	*	*	*	*	*	Solid	Artificial	RefeSol 05G	Dark	*
794	SR	Article	Soil	Schlich	2015	10.1016/j.envpol.2014.10.021	Influence of soil properties on the effect of silver nanomaterials on microbial activity in five soils	Schlich et al 2015. Influence of soil properties on the effect of silver nanomaterials on microbial activity in five soils. Environmental Pollution, 196, 321-330	AgNO3		Merck KGaA	*	Ag	7761-88-8	*	*	*	*	*	*	Unreported	Unreported	*	*	*	*	*	*	*	*	*	*	*	*	*	*	*	*	*	*	*	*	*	*	Solid	Artificial	RefeSol 05G	Dark	*
795	SR	Article	Soil	Schlich	2015	10.1016/j.envpol.2014.10.021	Influence of soil properties on the effect of silver nanomaterials on microbial activity in five soils	Schlich et al 2015. Influence of soil properties on the effect of silver nanomaterials on microbial activity in five soils. Environmental Pollution, 196, 321-330	NM300K	AgNM	JRC	Suspension	Ag	*	*	89.8	Tween	9005-70-3	8% (4% each)	*	15	Below 20	*	*	TEM	*	Spheroidal	*	*	*	*	TEM	5	*	MilliQ Water and 10.2% of Ag in suspension	*	52.31	Mean	NTA	*	*	*	*	*	Solid	Artificial	RefeSol 01A	Dark	*
796	SR	Article	Soil	Schlich	2015	10.1016/j.envpol.2014.10.021	Influence of soil properties on the effect of silver nanomaterials on microbial activity in five soils	Schlich et al 2015. Influence of soil properties on the effect of silver nanomaterials on microbial activity in five soils. Environmental Pollution, 196, 321-330	NM300K	AgNM	JRC	Suspension	Ag	*	*	89.8	Tween	9005-70-3	8% (4% each)	*	15	Below 20	*	*	TEM	*	Spheroidal	*	*	*	*	TEM	5	*	MilliQ Water and 10.2% of Ag in suspension	*	52.31	Mean	NTA	*	*	*	*	*	Solid	Artificial	RefeSol 01A	Dark	*
797	SR	Article	Soil	Schlich	2015	10.1016/j.envpol.2014.10.021	Influence of soil properties on the effect of silver nanomaterials on microbial activity in five soils	Schlich et al 2015. Influence of soil properties on the effect of silver nanomaterials on microbial activity in five soils. Environmental Pollution, 196, 321-330	AgNO3		Merck KGaA	*	Ag	7761-88-8	*	*	*	*	*	*	Unreported	Unreported	*	*	*	*	*	*	*	*	*	*	*	*	*	*	*	*	*	*	*	*	*	*	Solid	Artificial	RefeSol 01A	Dark	*
798	SR	Article	Soil	Schlich	2015	10.1016/j.envpol.2014.10.021	Influence of soil properties on the effect of silver nanomaterials on microbial activity in five soils	Schlich et al 2015. Influence of soil properties on the effect of silver nanomaterials on microbial activity in five soils. Environmental Pollution, 196, 321-330	AgNO3		Merck KGaA	*	Ag	7761-88-8	*	*	*	*	*	*	Unreported	Unreported	*	*	*	*	*	*	*	*	*	*	*	*	*	*	*	*	*	*	*	*	*	*	Solid	Artificial	RefeSol 02A	Dark	*
799	SR	Article	Soil	Schlich	2015	10.1016/j.envpol.2014.10.021	Influence of soil properties on the effect of silver nanomaterials on microbial activity in five soils	Schlich et al 2015. Influence of soil properties on the effect of silver nanomaterials on microbial activity in five soils. Environmental Pollution, 196, 321-330	AgNO3		Merck KGaA	*	Ag	7761-88-8	*	*	*	*	*	*	Unreported	Unreported	*	*	*	*	*	*	*	*	*	*	*	*	*	*	*	*	*	*	*	*	*	*	Solid	Artificial	RefeSol 04A	Dark	*
800	SR	Article	Soil	Schlich	2015	10.1016/j.envpol.2014.10.021	Influence of soil properties on the effect of silver nanomaterials on microbial activity in five soils	Schlich et al 2015. Influence of soil properties on the effect of silver nanomaterials on microbial activity in five soils. Environmental Pollution, 196, 321-330	AgNO3		Merck KGaA	*	Ag	7761-88-8	*	*	*	*	*	*	Unreported	Unreported	*	*	*	*	*	*	*	*	*	*	*	*	*	*	*	*	*	*	*	*	*	*	Solid	Artificial	RefeSol 03G	Dark	*
801	SR	Article	Soil	Schlich	2015	10.1016/j.envpol.2014.10.021	Influence of soil properties on the effect of silver nanomaterials on microbial activity in five soils	Schlich et al 2015. Influence of soil properties on the effect of silver nanomaterials on microbial activity in five soils. Environmental Pollution, 196, 321-330	AgNO3		Merck KGaA	*	Ag	7761-88-8	*	*	*	*	*	*	Unreported	Unreported	*	*	*	*	*	*	*	*	*	*	*	*	*	*	*	*	*	*	*	*	*	*	Solid	Artificial	RefeSol 03G	Dark	*
802	SR	Article	Soil	Schlich	2015	10.1016/j.envpol.2014.10.021	Influence of soil properties on the effect of silver nanomaterials on microbial activity in five soils	Schlich et al 2015. Influence of soil properties on the effect of silver nanomaterials on microbial activity in five soils. Environmental Pollution, 196, 321-330	AgNO3		Merck KGaA	*	Ag	7761-88-8	*	*	*	*	*	*	Unreported	Unreported	*	*	*	*	*	*	*	*	*	*	*	*	*	*	*	*	*	*	*	*	*	*	Solid	Artificial	RefeSol 05G	Dark	*
803	SR	Article	Soil	Schlich	2015	10.1016/j.envpol.2014.10.021	Influence of soil properties on the effect of silver nanomaterials on microbial activity in five soils	Schlich et al 2015. Influence of soil properties on the effect of silver nanomaterials on microbial activity in five soils. Environmental Pollution, 196, 321-330	AgNO3		Merck KGaA	*	Ag	7761-88-8	*	*	*	*	*	*	Unreported	Unreported	*	*	*	*	*	*	*	*	*	*	*	*	*	*	*	*	*	*	*	*	*	*	Solid	Artificial	RefeSol 05G	Dark	*
806	SR	Article	Soil	Schlich	2018	10.1016/j.envpol.2018.07.082	Long-term effects of three different silver sulfide nanomaterials, silver nitrate and bulk silver sulfide on soil microorganisms and plants	Schlich et al 2018. Long-term effects of three different silver sulfide nanomaterials, silver nitrate and bulk silver sulfide on soil microorganisms and plants. Environmental Pollution, 242, 1850-1859	AgNO3		Sigma-Aldrich	Suspension	Ag2S	7761-88-8	*	*	*	*	*	*	Unreported	Unreported	*	*	*	*	*	*	*	*	*	*	*	*	*	*	*	*	*	*	*	*	*	*	Solid	Artificial	RefeSol 01A	Light	*
807	SR	Article	Soil	Schlich	2018	10.1016/j.envpol.2018.07.082	Long-term effects of three different silver sulfide nanomaterials, silver nitrate and bulk silver sulfide on soil microorganisms and plants	Schlich et al 2018. Long-term effects of three different silver sulfide nanomaterials, silver nitrate and bulk silver sulfide on soil microorganisms and plants. Environmental Pollution, 242, 1850-1859	NM300K	AgNM	JRC	Suspension	Ag2S	*	*	89.8	Tween	9005-70-3	8% (4% each)	*	15	Below 20	*	*	TEM	*	Spheroidal	*	*	*	*	*	*	*	MilliQ Water and 10.2% of Ag in suspension	*	52.31	Mean	NTA	*	*	*	*	*	Solid	Artificial	RefeSol 01A	Light	*
808	SR	Article	Soil	Schlich	2018	10.1016/j.envpol.2018.07.082	Long-term effects of three different silver sulfide nanomaterials, silver nitrate and bulk silver sulfide on soil microorganisms and plants	Schlich et al 2018. Long-term effects of three different silver sulfide nanomaterials, silver nitrate and bulk silver sulfide on soil microorganisms and plants. Environmental Pollution, 242, 1850-1859	NM300K	AgNM	JRC	Suspension	Ag2S	*	*	89.8	Tween	9005-70-3	8% (4% each)	*	15	Below 20	*	*	TEM	*	Spheroidal	*	*	*	*	*	*	*	MilliQ Water and 10.2% of Ag in suspension	*	52.31	Mean	NTA	*	*	*	*	*	Solid	Artificial	RefeSol 01A	Light	*
809	SR	Article	Soil	Schlich	2018	10.1016/j.envpol.2018.07.082	Long-term effects of three different silver sulfide nanomaterials, silver nitrate and bulk silver sulfide on soil microorganisms and plants	Schlich et al 2018. Long-term effects of three different silver sulfide nanomaterials, silver nitrate and bulk silver sulfide on soil microorganisms and plants. Environmental Pollution, 242, 1850-1859	NM300K	AgNM	JRC	Suspension	Ag2S	*	*	89.8	Tween	9005-70-3	8% (4% each)	*	15	Below 20	*	*	TEM	*	Spheroidal	*	*	*	*	*	*	*	MilliQ Water and 10.2% of Ag in suspension	*	52.31	Mean	NTA	*	*	*	*	*	Solid	Artificial	RefeSol 01A	Light	*
810	SR	Article	Soil	Schlich	2018	10.1016/j.envpol.2018.07.082	Long-term effects of three different silver sulfide nanomaterials, silver nitrate and bulk silver sulfide on soil microorganisms and plants	Schlich et al 2018. Long-term effects of three different silver sulfide nanomaterials, silver nitrate and bulk silver sulfide on soil microorganisms and plants. Environmental Pollution, 242, 1850-1859	Ag2S		Sigma-Aldrich	Powder	Ag2S	21548-73-2	*	*	*	*	*	*	Unreported	Unreported	*	*	*	*	*	*	*	*	*	*	*	*	*	*	*	*	*	*	*	*	*	*	Solid	Artificial	RefeSol 01A	Light	*
811	SR	Article	Soil	Schlich	2018	10.1016/j.envpol.2018.07.082	Long-term effects of three different silver sulfide nanomaterials, silver nitrate and bulk silver sulfide on soil microorganisms and plants	Schlich et al 2018. Long-term effects of three different silver sulfide nanomaterials, silver nitrate and bulk silver sulfide on soil microorganisms and plants. Environmental Pollution, 242, 1850-1859	AgNO3		Sigma-Aldrich	Suspension	Ag2S	7761-88-8	*	*	*	*	*	*	Unreported	Unreported	*	*	*	*	*	*	*	*	*	*	*	*	*	*	*	*	*	*	*	*	*	*	Solid	Artificial	RefeSol 01A	Light	*
812	SR	Article	Soil	Schlich	2018	10.1016/j.envpol.2018.07.082	Long-term effects of three different silver sulfide nanomaterials, silver nitrate and bulk silver sulfide on soil microorganisms and plants	Schlich et al 2018. Long-term effects of three different silver sulfide nanomaterials, silver nitrate and bulk silver sulfide on soil microorganisms and plants. Environmental Pollution, 242, 1850-1859	NM300K	AgNM	JRC	Suspension	Ag2S	*	*	89.8	Tween	9005-70-3	8% (4% each)	*	15	Below 20	*	*	TEM	*	Spheroidal	*	*	*	*	*	*	*	MilliQ Water and 10.2% of Ag in suspension	*	52.31	Mean	NTA	*	*	*	*	*	Solid	Artificial	RefeSol 01A	Light	*
813	SR	Article	Soil	Schlich	2018	10.1016/j.envpol.2018.07.082	Long-term effects of three different silver sulfide nanomaterials, silver nitrate and bulk silver sulfide on soil microorganisms and plants	Schlich et al 2018. Long-term effects of three different silver sulfide nanomaterials, silver nitrate and bulk silver sulfide on soil microorganisms and plants. Environmental Pollution, 242, 1850-1859	NM300K	AgNM	JRC	Suspension	Ag2S	*	*	89.8	Tween	9005-70-3	8% (4% each)	*	15	Below 20	*	*	TEM	*	Spheroidal	*	*	*	*	*	*	*	MilliQ Water and 10.2% of Ag in suspension	*	52.31	Mean	NTA	*	*	*	*	*	Solid	Artificial	RefeSol 01A	Light	*
814	SR	Article	Soil	Schlich	2018	10.1016/j.envpol.2018.07.082	Long-term effects of three different silver sulfide nanomaterials, silver nitrate and bulk silver sulfide on soil microorganisms and plants	Schlich et al 2018. Long-term effects of three different silver sulfide nanomaterials, silver nitrate and bulk silver sulfide on soil microorganisms and plants. Environmental Pollution, 242, 1850-1859	NM300K	AgNM	JRC	Suspension	Ag2S	*	*	89.8	Tween	9005-70-3	8% (4% each)	*	15	Below 20	*	*	TEM	*	Spheroidal	*	*	*	*	*	*	*	MilliQ Water and 10.2% of Ag in suspension	*	52.31	Mean	NTA	*	*	*	*	*	Solid	Artificial	RefeSol 01A	Light	*
815	SR	Article	Soil	Schlich	2018	10.1016/j.envpol.2018.07.082	Long-term effects of three different silver sulfide nanomaterials, silver nitrate and bulk silver sulfide on soil microorganisms and plants	Schlich et al 2018. Long-term effects of three different silver sulfide nanomaterials, silver nitrate and bulk silver sulfide on soil microorganisms and plants. Environmental Pollution, 242, 1850-1859	Ag2S		Sigma-Aldrich	Powder	Ag2S	21548-73-2	*	*	*	*	*	*	Unreported	Unreported	*	*	*	*	*	*	*	*	*	*	*	*	*	*	*	*	*	*	*	*	*	*	Solid	Artificial	RefeSol 01A	Light	*
816	SR	Article	Soil	Schlich	2018	10.1016/j.envpol.2018.07.082	Long-term effects of three different silver sulfide nanomaterials, silver nitrate and bulk silver sulfide on soil microorganisms and plants	Schlich et al 2018. Long-term effects of three different silver sulfide nanomaterials, silver nitrate and bulk silver sulfide on soil microorganisms and plants. Environmental Pollution, 242, 1850-1859	AgNO3		Sigma-Aldrich	Suspension	Ag2S	7761-88-8	*	*	*	*	*	*	Unreported	Unreported	*	*	*	*	*	*	*	*	*	*	*	*	*	*	*	*	*	*	*	*	*	*	Solid	Artificial	RefeSol 01A	Light	*
817	SR	Article	Soil	Schlich	2018	10.1016/j.envpol.2018.07.082	Long-term effects of three different silver sulfide nanomaterials, silver nitrate and bulk silver sulfide on soil microorganisms and plants	Schlich et al 2018. Long-term effects of three different silver sulfide nanomaterials, silver nitrate and bulk silver sulfide on soil microorganisms and plants. Environmental Pollution, 242, 1850-1859	NM300K	AgNM	JRC	Suspension	Ag2S	*	*	89.8	Tween	9005-70-3	8% (4% each)	*	15	Below 20	*	*	TEM	*	Spheroidal	*	*	*	*	*	*	*	MilliQ Water and 10.2% of Ag in suspension	*	52.31	Mean	NTA	*	*	*	*	*	Solid	Artificial	RefeSol 01A	Light	*
818	SR	Article	Soil	Schlich	2018	10.1016/j.envpol.2018.07.082	Long-term effects of three different silver sulfide nanomaterials, silver nitrate and bulk silver sulfide on soil microorganisms and plants	Schlich et al 2018. Long-term effects of three different silver sulfide nanomaterials, silver nitrate and bulk silver sulfide on soil microorganisms and plants. Environmental Pollution, 242, 1850-1859	NM300K	AgNM	JRC	Suspension	Ag2S	*	*	89.8	Tween	9005-70-3	8% (4% each)	*	15	Below 20	*	*	TEM	*	Spheroidal	*	*	*	*	*	*	*	MilliQ Water and 10.2% of Ag in suspension	*	52.31	Mean	NTA	*	*	*	*	*	Solid	Artificial	RefeSol 01A	Light	*
819	SR	Article	Soil	Schlich	2018	10.1016/j.envpol.2018.07.082	Long-term effects of three different silver sulfide nanomaterials, silver nitrate and bulk silver sulfide on soil microorganisms and plants	Schlich et al 2018. Long-term effects of three different silver sulfide nanomaterials, silver nitrate and bulk silver sulfide on soil microorganisms and plants. Environmental Pollution, 242, 1850-1859	NM300K	AgNM	JRC	Suspension	Ag2S	*	*	89.8	Tween	9005-70-3	8% (4% each)	*	15	Below 20	*	*	TEM	*	Spheroidal	*	*	*	*	*	*	*	MilliQ Water and 10.2% of Ag in suspension	*	52.31	Mean	NTA	*	*	*	*	*	Solid	Artificial	RefeSol 01A	Light	*
820	SR	Article	Soil	Schlich	2018	10.1016/j.envpol.2018.07.082	Long-term effects of three different silver sulfide nanomaterials, silver nitrate and bulk silver sulfide on soil microorganisms and plants	Schlich et al 2018. Long-term effects of three different silver sulfide nanomaterials, silver nitrate and bulk silver sulfide on soil microorganisms and plants. Environmental Pollution, 242, 1850-1859	Ag2S		Sigma-Aldrich	Powder	Ag2S	21548-73-2	*	*	*	*	*	*	Unreported	Unreported	*	*	*	*	*	*	*	*	*	*	*	*	*	*	*	*	*	*	*	*	*	*	Solid	Artificial	RefeSol 01A	Light	*
821	SR	Article	Soil	Schlich	2018	10.1016/j.envpol.2018.07.082	Long-term effects of three different silver sulfide nanomaterials, silver nitrate and bulk silver sulfide on soil microorganisms and plants	Schlich et al 2018. Long-term effects of three different silver sulfide nanomaterials, silver nitrate and bulk silver sulfide on soil microorganisms and plants. Environmental Pollution, 242, 1850-1859	AgNO3		Sigma-Aldrich	Suspension	Ag2S	7761-88-8	*	*	*	*	*	*	Unreported	Unreported	*	*	*	*	*	*	*	*	*	*	*	*	*	*	*	*	*	*	*	*	*	*	Solid	Artificial	RefeSol 01A	Light	*
822	SR	Article	Soil	Schlich	2018	10.1016/j.envpol.2018.07.082	Long-term effects of three different silver sulfide nanomaterials, silver nitrate and bulk silver sulfide on soil microorganisms and plants	Schlich et al 2018. Long-term effects of three different silver sulfide nanomaterials, silver nitrate and bulk silver sulfide on soil microorganisms and plants. Environmental Pollution, 242, 1850-1859	NM300K	AgNM	JRC	Suspension	Ag2S	*	*	89.8	Tween	9005-70-3	8% (4% each)	*	15	Below 20	*	*	TEM	*	Spheroidal	*	*	*	*	*	*	*	MilliQ Water and 10.2% of Ag in suspension	*	52.31	Mean	NTA	*	*	*	*	*	Solid	Artificial	RefeSol 01A	Light	*
823	SR	Article	Soil	Schlich	2018	10.1016/j.envpol.2018.07.082	Long-term effects of three different silver sulfide nanomaterials, silver nitrate and bulk silver sulfide on soil microorganisms and plants	Schlich et al 2018. Long-term effects of three different silver sulfide nanomaterials, silver nitrate and bulk silver sulfide on soil microorganisms and plants. Environmental Pollution, 242, 1850-1859	NM300K	AgNM	JRC	Suspension	Ag2S	*	*	89.8	Tween	9005-70-3	8% (4% each)	*	15	Below 20	*	*	TEM	*	Spheroidal	*	*	*	*	*	*	*	MilliQ Water and 10.2% of Ag in suspension	*	52.31	Mean	NTA	*	*	*	*	*	Solid	Artificial	RefeSol 01A	Light	*
824	SR	Article	Soil	Schlich	2018	10.1016/j.envpol.2018.07.082	Long-term effects of three different silver sulfide nanomaterials, silver nitrate and bulk silver sulfide on soil microorganisms and plants	Schlich et al 2018. Long-term effects of three different silver sulfide nanomaterials, silver nitrate and bulk silver sulfide on soil microorganisms and plants. Environmental Pollution, 242, 1850-1859	NM300K	AgNM	JRC	Suspension	Ag2S	*	*	89.8	Tween	9005-70-3	8% (4% each)	*	15	Below 20	*	*	TEM	*	Spheroidal	*	*	*	*	*	*	*	MilliQ Water and 10.2% of Ag in suspension	*	52.31	Mean	NTA	*	*	*	*	*	Solid	Artificial	RefeSol 01A	Light	*
825	SR	Article	Soil	Schlich	2018	10.1016/j.envpol.2018.07.082	Long-term effects of three different silver sulfide nanomaterials, silver nitrate and bulk silver sulfide on soil microorganisms and plants	Schlich et al 2018. Long-term effects of three different silver sulfide nanomaterials, silver nitrate and bulk silver sulfide on soil microorganisms and plants. Environmental Pollution, 242, 1850-1859	Ag2S		Sigma-Aldrich	Powder	Ag2S	21548-73-2	*	*	*	*	*	*	Unreported	Unreported	*	*	*	*	*	*	*	*	*	*	*	*	*	*	*	*	*	*	*	*	*	*	Solid	Artificial	RefeSol 01A	Light	*
826	SR	Article	Soil	Schlich	2018	10.1016/j.envpol.2018.07.082	Long-term effects of three different silver sulfide nanomaterials, silver nitrate and bulk silver sulfide on soil microorganisms and plants	Schlich et al 2018. Long-term effects of three different silver sulfide nanomaterials, silver nitrate and bulk silver sulfide on soil microorganisms and plants. Environmental Pollution, 242, 1850-1859	AgNO3		Sigma-Aldrich	Suspension	Ag2S	7761-88-8	*	*	*	*	*	*	Unreported	Unreported	*	*	*	*	*	*	*	*	*	*	*	*	*	*	*	*	*	*	*	*	*	*	Solid	Artificial	RefeSol 01A	Light	*
827	SR	Article	Soil	Schlich	2018	10.1016/j.envpol.2018.07.082	Long-term effects of three different silver sulfide nanomaterials, silver nitrate and bulk silver sulfide on soil microorganisms and plants	Schlich et al 2018. Long-term effects of three different silver sulfide nanomaterials, silver nitrate and bulk silver sulfide on soil microorganisms and plants. Environmental Pollution, 242, 1850-1859	NM300K	AgNM	JRC	Suspension	Ag2S	*	*	89.8	Tween	9005-70-3	8% (4% each)	*	15	Below 20	*	*	TEM	*	Spheroidal	*	*	*	*	*	*	*	MilliQ Water and 10.2% of Ag in suspension	*	52.31	Mean	NTA	*	*	*	*	*	Solid	Artificial	RefeSol 01A	Light	*
828	SR	Article	Soil	Schlich	2018	10.1016/j.envpol.2018.07.082	Long-term effects of three different silver sulfide nanomaterials, silver nitrate and bulk silver sulfide on soil microorganisms and plants	Schlich et al 2018. Long-term effects of three different silver sulfide nanomaterials, silver nitrate and bulk silver sulfide on soil microorganisms and plants. Environmental Pollution, 242, 1850-1859	NM300K	AgNM	JRC	Suspension	Ag2S	*	*	89.8	Tween	9005-70-3	8% (4% each)	*	15	Below 20	*	*	TEM	*	Spheroidal	*	*	*	*	*	*	*	MilliQ Water and 10.2% of Ag in suspension	*	52.31	Mean	NTA	*	*	*	*	*	Solid	Artificial	RefeSol 01A	Light	*
829	SR	Article	Soil	Schlich	2018	10.1016/j.envpol.2018.07.082	Long-term effects of three different silver sulfide nanomaterials, silver nitrate and bulk silver sulfide on soil microorganisms and plants	Schlich et al 2018. Long-term effects of three different silver sulfide nanomaterials, silver nitrate and bulk silver sulfide on soil microorganisms and plants. Environmental Pollution, 242, 1850-1859	NM300K	AgNM	JRC	Suspension	Ag2S	*	*	89.8	Tween	9005-70-3	8% (4% each)	*	15	Below 20	*	*	TEM	*	Spheroidal	*	*	*	*	*	*	*	MilliQ Water and 10.2% of Ag in suspension	*	52.31	Mean	NTA	*	*	*	*	*	Solid	Artificial	RefeSol 01A	Light	*
830	SR	Article	Soil	Schlich	2018	10.1016/j.envpol.2018.07.082	Long-term effects of three different silver sulfide nanomaterials, silver nitrate and bulk silver sulfide on soil microorganisms and plants	Schlich et al 2018. Long-term effects of three different silver sulfide nanomaterials, silver nitrate and bulk silver sulfide on soil microorganisms and plants. Environmental Pollution, 242, 1850-1859	Ag2S		Sigma-Aldrich	Powder	Ag2S	21548-73-2	*	*	*	*	*	*	Unreported	Unreported	*	*	*	*	*	*	*	*	*	*	*	*	*	*	*	*	*	*	*	*	*	*	Solid	Artificial	RefeSol 01A	Light	*
831	SR	Article	Soil	Schlich	2018	10.1016/j.envpol.2018.07.082	Long-term effects of three different silver sulfide nanomaterials, silver nitrate and bulk silver sulfide on soil microorganisms and plants	Schlich et al 2018. Long-term effects of three different silver sulfide nanomaterials, silver nitrate and bulk silver sulfide on soil microorganisms and plants. Environmental Pollution, 242, 1850-1859	AgNO3		Sigma-Aldrich	Suspension	Ag2S	7761-88-8	*	*	*	*	*	*	Unreported	Unreported	*	*	*	*	*	*	*	*	*	*	*	*	*	*	*	*	*	*	*	*	*	*	Solid	*	*	Light	*
832	SR	Article	Soil	Schlich	2018	10.1016/j.envpol.2018.07.082	Long-term effects of three different silver sulfide nanomaterials, silver nitrate and bulk silver sulfide on soil microorganisms and plants	Schlich et al 2018. Long-term effects of three different silver sulfide nanomaterials, silver nitrate and bulk silver sulfide on soil microorganisms and plants. Environmental Pollution, 242, 1850-1859	NM300K	AgNM	JRC	Suspension	Ag2S	*	*	89.8	Tween	9005-70-3	8% (4% each)	*	15	Below 20	*	*	TEM	*	Spheroidal	*	*	*	*	*	*	*	MilliQ Water and 10.2% of Ag in suspension	*	52.31	Mean	NTA	*	*	*	*	*	Solid	Artificial	RefeSol 01A	Light	*
833	SR	Article	Soil	Schlich	2018	10.1016/j.envpol.2018.07.082	Long-term effects of three different silver sulfide nanomaterials, silver nitrate and bulk silver sulfide on soil microorganisms and plants	Schlich et al 2018. Long-term effects of three different silver sulfide nanomaterials, silver nitrate and bulk silver sulfide on soil microorganisms and plants. Environmental Pollution, 242, 1850-1859	NM300K	AgNM	JRC	Suspension	Ag2S	*	*	89.8	Tween	9005-70-3	8% (4% each)	*	15	Below 20	*	*	TEM	*	Spheroidal	*	*	*	*	*	*	*	MilliQ Water and 10.2% of Ag in suspension	*	52.31	Mean	NTA	*	*	*	*	*	Solid	Artificial	RefeSol 01A	Light	*
834	SR	Article	Soil	Schlich	2018	10.1016/j.envpol.2018.07.082	Long-term effects of three different silver sulfide nanomaterials, silver nitrate and bulk silver sulfide on soil microorganisms and plants	Schlich et al 2018. Long-term effects of three different silver sulfide nanomaterials, silver nitrate and bulk silver sulfide on soil microorganisms and plants. Environmental Pollution, 242, 1850-1859	NM300K	AgNM	JRC	Suspension	Ag2S	*	*	89.8	Tween	9005-70-3	8% (4% each)	*	15	Below 20	*	*	TEM	*	Spheroidal	*	*	*	*	*	*	*	MilliQ Water and 10.2% of Ag in suspension	*	52.31	Mean	NTA	*	*	*	*	*	Solid	Artificial	RefeSol 01A	Light	*
835	SR	Article	Soil	Schlich	2018	10.1016/j.envpol.2018.07.082	Long-term effects of three different silver sulfide nanomaterials, silver nitrate and bulk silver sulfide on soil microorganisms and plants	Schlich et al 2018. Long-term effects of three different silver sulfide nanomaterials, silver nitrate and bulk silver sulfide on soil microorganisms and plants. Environmental Pollution, 242, 1850-1859	Ag2S		Sigma-Aldrich	Powder	Ag2S	21548-73-2	*	*	*	*	*	*	Unreported	Unreported	*	*	*	*	*	*	*	*	*	*	*	*	*	*	*	*	*	*	*	*	*	*	Solid	Artificial	RefeSol 01A	Light	*
837	SR	Article	Soil	Sillapawattana	2016	10.1186/s12302-016-0095-4	Effect of silver nanoparticles on the standard soil arthropod folsomia candida and the eukaryote model organism saccharomyces cerevisiae	Sillapawattana et al 2016. Effect of silver nanoparticles on the standard soil arthropod folsomia candida and the eukaryote model organism saccharomyces cerevisiae. Environ Sci Eur, 28, 27	AgNO3		*	Suspension	Ag	7761-88-8	*	*	*	*	*	*	Unreported	Unreported	*	*	*	*	*	*	*	*	*	*	*	*	*	*	*	*	*	*	*	*	*	*	Liquid	*	YPD algar plates	Dark	*
839	SR	Article	Soil	Sillapawattana	2016	10.1186/s12302-016-0095-4	Effect of silver nanoparticles on the standard soil arthropod folsomia candida and the eukaryote model organism saccharomyces cerevisiae	Sillapawattana et al 2016. Effect of silver nanoparticles on the standard soil arthropod folsomia candida and the eukaryote model organism saccharomyces cerevisiae. Environ Sci Eur, 28, 27	AgNO3		*	Suspension	Ag	7761-88-8	*	*	*	*	*	*	Unreported	Unreported	*	*	*	*	*	*	*	*	*	*	*	*	*	*	*	*	*	*	*	*	*	*	Liquid	*	YPD algar plates	Dark	*
841	SR	Article	Soil	Sillapawattana	2016	10.1186/s12302-016-0095-4	Effect of silver nanoparticles on the standard soil arthropod folsomia candida and the eukaryote model organism saccharomyces cerevisiae	Sillapawattana et al 2016. Effect of silver nanoparticles on the standard soil arthropod folsomia candida and the eukaryote model organism saccharomyces cerevisiae. Environ Sci Eur, 28, 27	AgNO3		*	Suspension	Ag	7761-88-8	*	*	*	*	*	*	Unreported	Unreported	*	*	*	*	*	*	*	*	*	*	*	*	*	*	*	*	*	*	*	*	*	*	Liquid	*	YPD algar plates	Dark	*
843	SR	Article	Soil	Sillapawattana	2016	10.1186/s12302-016-0095-4	Effect of silver nanoparticles on the standard soil arthropod folsomia candida and the eukaryote model organism saccharomyces cerevisiae	Sillapawattana et al 2016. Effect of silver nanoparticles on the standard soil arthropod folsomia candida and the eukaryote model organism saccharomyces cerevisiae. Environ Sci Eur, 28, 27	AgNO3		*	Suspension	Ag	7761-88-8	*	*	*	*	*	*	Unreported	Unreported	*	*	*	*	*	*	*	*	*	*	*	*	*	*	*	*	*	*	*	*	*	*	Liquid	*	YPD algar plates	Dark	*
845	SR	Article	Soil	Sillapawattana	2016	10.1186/s12302-016-0095-4	Effect of silver nanoparticles on the standard soil arthropod folsomia candida and the eukaryote model organism saccharomyces cerevisiae	Sillapawattana et al 2016. Effect of silver nanoparticles on the standard soil arthropod folsomia candida and the eukaryote model organism saccharomyces cerevisiae. Environ Sci Eur, 28, 27	AgNO3		*	Suspension	Ag	7761-88-8	*	*	*	*	*	*	Unreported	Unreported	*	*	*	*	*	*	*	*	*	*	*	*	*	*	*	*	*	*	*	*	*	*	Liquid	*	YPD algar plates	Dark	*
847	SR	Article	Soil	Sillapawattana	2016	10.1186/s12302-016-0095-4	Effect of silver nanoparticles on the standard soil arthropod folsomia candida and the eukaryote model organism saccharomyces cerevisiae	Sillapawattana et al 2016. Effect of silver nanoparticles on the standard soil arthropod folsomia candida and the eukaryote model organism saccharomyces cerevisiae. Environ Sci Eur, 28, 27	NM300K	AgNM	JRC	Suspension	Ag	*	*	89.8	Tween-acrylic	9005-70-3 and 9003-04-7	0.01	*	15	Below 20	*	*	TEM	*	Spheroidal	*	*	*	*	*	*	*	MilliQ Water and 10.2% of Ag in suspension	*	52.31	Mean	NTA	*	*	*	*	*	Liquid	*	YPD algar plates	Dark	*
849	SR	Article	Soil	Sillapawattana	2016	10.1186/s12302-016-0095-4	Effect of silver nanoparticles on the standard soil arthropod folsomia candida and the eukaryote model organism saccharomyces cerevisiae	Sillapawattana et al 2016. Effect of silver nanoparticles on the standard soil arthropod folsomia candida and the eukaryote model organism saccharomyces cerevisiae. Environ Sci Eur, 28, 27	NM300K	AgNM	JRC	Suspension	Ag	*	*	89.8	Tween-acrylic	9005-70-3 and 9003-04-7	0.01	*	15	Below 20	*	*	TEM	*	Spheroidal	*	*	*	*	*	*	*	MilliQ Water and 10.2% of Ag in suspension	*	52.31	Mean	NTA	*	*	*	*	*	Liquid	*	YPD algar plates	Dark	*
851	SR	Article	Soil	Sillapawattana	2016	10.1186/s12302-016-0095-4	Effect of silver nanoparticles on the standard soil arthropod folsomia candida and the eukaryote model organism saccharomyces cerevisiae	Sillapawattana et al 2016. Effect of silver nanoparticles on the standard soil arthropod folsomia candida and the eukaryote model organism saccharomyces cerevisiae. Environ Sci Eur, 28, 27	NM300K	AgNM	JRC	Suspension	Ag	*	*	89.8	Tween-acrylic	9005-70-3 and 9003-04-7	0.01	*	15	Below 20	*	*	TEM	*	Spheroidal	*	*	*	*	*	*	*	MilliQ Water and 10.2% of Ag in suspension	*	52.31	Mean	NTA	*	*	*	*	*	Liquid	*	YPD algar plates	Dark	*
853	SR	Article	Soil	Sillapawattana	2016	10.1186/s12302-016-0095-4	Effect of silver nanoparticles on the standard soil arthropod folsomia candida and the eukaryote model organism saccharomyces cerevisiae	Sillapawattana et al 2016. Effect of silver nanoparticles on the standard soil arthropod folsomia candida and the eukaryote model organism saccharomyces cerevisiae. Environ Sci Eur, 28, 27	NM300K	AgNM	JRC	Suspension	Ag	*	*	89.8	Tween-acrylic	9005-70-3 and 9003-04-7	0.01	*	15	Below 20	*	*	TEM	*	Spheroidal	*	*	*	*	*	*	*	MilliQ Water and 10.2% of Ag in suspension	*	52.31	Mean	NTA	*	*	*	*	*	Liquid	*	YPD algar plates	Dark	*
855	SR	Article	Soil	Sillapawattana	2016	10.1186/s12302-016-0095-4	Effect of silver nanoparticles on the standard soil arthropod folsomia candida and the eukaryote model organism saccharomyces cerevisiae	Sillapawattana et al 2016. Effect of silver nanoparticles on the standard soil arthropod folsomia candida and the eukaryote model organism saccharomyces cerevisiae. Environ Sci Eur, 28, 27	AgNO3		*	Suspension	Ag	7761-88-8	*	*	*	*	*	*	Unreported	Unreported	*	*	*	*	*	*	*	*	*	*	*	*	*	*	*	*	*	*	*	*	*	*	Liquid	*	YPD algar plates	Dark	*
857	SR	Article	Soil	Sillapawattana	2016	10.1186/s12302-016-0095-4	Effect of silver nanoparticles on the standard soil arthropod folsomia candida and the eukaryote model organism saccharomyces cerevisiae	Sillapawattana et al 2016. Effect of silver nanoparticles on the standard soil arthropod folsomia candida and the eukaryote model organism saccharomyces cerevisiae. Environ Sci Eur, 28, 27	AgNO3		*	Suspension	Ag	7761-88-8	*	*	*	*	*	*	Unreported	Unreported	*	*	*	*	*	*	*	*	*	*	*	*	*	*	*	*	*	*	*	*	*	*	Liquid	*	YPD algar plates	Dark	*
859	SR	Article	Soil	Sillapawattana	2016	10.1186/s12302-016-0095-4	Effect of silver nanoparticles on the standard soil arthropod folsomia candida and the eukaryote model organism saccharomyces cerevisiae	Sillapawattana et al 2016. Effect of silver nanoparticles on the standard soil arthropod folsomia candida and the eukaryote model organism saccharomyces cerevisiae. Environ Sci Eur, 28, 27	AgNO3		*	Suspension	Ag	7761-88-8	*	*	*	*	*	*	Unreported	Unreported	*	*	*	*	*	*	*	*	*	*	*	*	*	*	*	*	*	*	*	*	*	*	Liquid	*	YPD algar plates	Dark	*
861	SR	Article	Soil	Sillapawattana	2016	10.1186/s12302-016-0095-4	Effect of silver nanoparticles on the standard soil arthropod folsomia candida and the eukaryote model organism saccharomyces cerevisiae	Sillapawattana et al 2016. Effect of silver nanoparticles on the standard soil arthropod folsomia candida and the eukaryote model organism saccharomyces cerevisiae. Environ Sci Eur, 28, 27	AgNO3		*	Suspension	Ag	7761-88-8	*	*	*	*	*	*	Unreported	Unreported	*	*	*	*	*	*	*	*	*	*	*	*	*	*	*	*	*	*	*	*	*	*	Liquid	*	YPD algar plates	Dark	*
863	SR	Article	Soil	Sillapawattana	2016	10.1186/s12302-016-0095-4	Effect of silver nanoparticles on the standard soil arthropod folsomia candida and the eukaryote model organism saccharomyces cerevisiae	Sillapawattana et al 2016. Effect of silver nanoparticles on the standard soil arthropod folsomia candida and the eukaryote model organism saccharomyces cerevisiae. Environ Sci Eur, 28, 27	AgNO3		*	Suspension	Ag	7761-88-8	*	*	*	*	*	*	Unreported	Unreported	*	*	*	*	*	*	*	*	*	*	*	*	*	*	*	*	*	*	*	*	*	*	Liquid	*	YPD algar plates	Dark	*
865	SR	Article	Soil	Sillapawattana	2016	10.1186/s12302-016-0095-4	Effect of silver nanoparticles on the standard soil arthropod folsomia candida and the eukaryote model organism saccharomyces cerevisiae	Sillapawattana et al 2016. Effect of silver nanoparticles on the standard soil arthropod folsomia candida and the eukaryote model organism saccharomyces cerevisiae. Environ Sci Eur, 28, 27	AgNO3		*	Suspension	Ag	7761-88-8	*	*	*	*	*	*	Unreported	Unreported	*	*	*	*	*	*	*	*	*	*	*	*	*	*	*	*	*	*	*	*	*	*	Liquid	*	YPD algar plates	Dark	*
867	SR	Article	Soil	Sillapawattana	2016	10.1186/s12302-016-0095-4	Effect of silver nanoparticles on the standard soil arthropod folsomia candida and the eukaryote model organism saccharomyces cerevisiae	Sillapawattana et al 2016. Effect of silver nanoparticles on the standard soil arthropod folsomia candida and the eukaryote model organism saccharomyces cerevisiae. Environ Sci Eur, 28, 27	NM300K	AgNM	JRC	Suspension	Ag	*	*	89.8	Tween-acrylic	9005-70-3 and 9003-04-7	0.01	*	15	Below 20	*	*	TEM	*	Spheroidal	*	*	*	*	*	*	*	MilliQ Water and 10.2% of Ag in suspension	*	52.31	Mean	NTA	*	*	*	*	*	Liquid	*	YPD algar plates	Dark	*
869	SR	Article	Soil	Sillapawattana	2016	10.1186/s12302-016-0095-4	Effect of silver nanoparticles on the standard soil arthropod folsomia candida and the eukaryote model organism saccharomyces cerevisiae	Sillapawattana et al 2016. Effect of silver nanoparticles on the standard soil arthropod folsomia candida and the eukaryote model organism saccharomyces cerevisiae. Environ Sci Eur, 28, 27	NM300K	AgNM	JRC	Suspension	Ag	*	*	89.8	Tween-acrylic	9005-70-3 and 9003-04-7	0.01	*	15	Below 20	*	*	TEM	*	Spheroidal	*	*	*	*	*	*	*	MilliQ Water and 10.2% of Ag in suspension	*	52.31	Mean	NTA	*	*	*	*	*	Liquid	*	YPD algar plates	Dark	*
871	SR	Article	Soil	Sillapawattana	2016	10.1186/s12302-016-0095-4	Effect of silver nanoparticles on the standard soil arthropod folsomia candida and the eukaryote model organism saccharomyces cerevisiae	Sillapawattana et al 2016. Effect of silver nanoparticles on the standard soil arthropod folsomia candida and the eukaryote model organism saccharomyces cerevisiae. Environ Sci Eur, 28, 27	NM300K	AgNM	JRC	Suspension	Ag	*	*	89.8	Tween-acrylic	9005-70-3 and 9003-04-7	0.01	*	15	Below 20	*	*	TEM	*	Spheroidal	*	*	*	*	*	*	*	MilliQ Water and 10.2% of Ag in suspension	*	52.31	Mean	NTA	*	*	*	*	*	Liquid	*	YPD algar plates	Dark	*
873	SR	Article	Soil	Sillapawattana	2016	10.1186/s12302-016-0095-4	Effect of silver nanoparticles on the standard soil arthropod folsomia candida and the eukaryote model organism saccharomyces cerevisiae	Sillapawattana et al 2016. Effect of silver nanoparticles on the standard soil arthropod folsomia candida and the eukaryote model organism saccharomyces cerevisiae. Environ Sci Eur, 28, 27	NM300K	AgNM	JRC	Suspension	Ag	*	*	89.8	Tween-acrylic	9005-70-3 and 9003-04-7	0.01	*	15	Below 20	*	*	TEM	*	Spheroidal	*	*	*	*	*	*	*	MilliQ Water and 10.2% of Ag in suspension	*	52.31	Mean	NTA	*	*	*	*	*	Liquid	*	YPD algar plates	Dark	*
875	SR	Article	Soil	Sillapawattana	2016	10.1186/s12302-016-0095-4	Effect of silver nanoparticles on the standard soil arthropod folsomia candida and the eukaryote model organism saccharomyces cerevisiae	Sillapawattana et al 2016. Effect of silver nanoparticles on the standard soil arthropod folsomia candida and the eukaryote model organism saccharomyces cerevisiae. Environ Sci Eur, 28, 27	NM300K	AgNM	JRC	Suspension	Ag	*	*	89.8	Tween-acrylic	9005-70-3 and 9003-04-7	0.01	*	15	Below 20	*	*	TEM	*	Spheroidal	*	*	*	*	*	*	*	MilliQ Water and 10.2% of Ag in suspension	*	52.31	Mean	NTA	*	*	*	*	*	Liquid	*	YPD algar plates	Dark	*
877	SR	Article	Soil	Hund-Rinke	2019	10.3109/17435390.2015.1054909	Evaluation of microbrial shifts caused by a silver nanomaterial: comparison of four test systems	Hund-Rinke et al 2019. Evaluation of microbrial shifts caused by a silver nanomaterial: comparison of four test systems. Environmental Sciences Europe, 31, 86	NM300K	AgNM	JRC	Suspension	Ag	*	*	89.8	Tween	9005-70-3	8% (4% each)	*	15	Below 20	*	*	TEM	*	Spheroidal	*	*	*	*	TEM	5	*	MilliQ Water and 10.2% of Ag in suspension	Ultrasonic bath	52.31	Mean	NTA	*	*	*	*	*	Solid	Natural media	RefeSol 01A	Dark	*
878	SR	Article	Soil	Hund-Rinke	2019	10.3109/17435390.2015.1054909	Evaluation of microbrial shifts caused by a silver nanomaterial: comparison of four test systems	Hund-Rinke et al 2019. Evaluation of microbrial shifts caused by a silver nanomaterial: comparison of four test systems. Environmental Sciences Europe, 31, 86	NM300K	AgNM	JRC	Suspension	Ag	*	*	89.8	Tween	9005-70-3	8% (4% each)	*	15	Below 20	*	*	TEM	*	Spheroidal	*	*	*	*	TEM	5	*	MilliQ Water and 10.2% of Ag in suspension	Ultrasonic bath	52.31	Mean	NTA	*	*	*	*	*	Solid	Natural media	RefeSol 01A	Dark	*
879	SR	Article	Soil	Hund-Rinke	2019	10.3109/17435390.2015.1054909	Evaluation of microbrial shifts caused by a silver nanomaterial: comparison of four test systems	Hund-Rinke et al 2019. Evaluation of microbrial shifts caused by a silver nanomaterial: comparison of four test systems. Environmental Sciences Europe, 31, 86	NM300K	AgNM	JRC	Suspension	Ag	*	*	89.8	Tween	9005-70-3	8% (4% each)	*	15	Below 20	*	*	TEM	*	Spheroidal	*	*	*	*	TEM	5	*	MilliQ Water and 10.2% of Ag in suspension	Ultrasonic bath	52.31	Mean	NTA	*	*	*	*	*	Solid	Natural media	RefeSol 01A	Dark	*
880	SR	Article	Soil	Hund-Rinke	2019	10.3109/17435390.2015.1054909	Evaluation of microbrial shifts caused by a silver nanomaterial: comparison of four test systems	Hund-Rinke et al 2019. Evaluation of microbrial shifts caused by a silver nanomaterial: comparison of four test systems. Environmental Sciences Europe, 31, 86	NM300K	AgNM	JRC	Suspension	Ag	*	*	89.8	Tween	9005-70-3	8% (4% each)	*	15	Below 20	*	*	TEM	*	Spheroidal	*	*	*	*	TEM	5	*	MilliQ Water and 10.2% of Ag in suspension	Ultrasonic bath	52.31	Mean	NTA	*	*	*	*	*	Solid	Natural media	RefeSol 01A	Dark	*
881	SR	Article	Soil	Hund-Rinke	2019	10.3109/17435390.2015.1054909	Evaluation of microbrial shifts caused by a silver nanomaterial: comparison of four test systems	Hund-Rinke et al 2019. Evaluation of microbrial shifts caused by a silver nanomaterial: comparison of four test systems. Environmental Sciences Europe, 31, 86	NM300K	AgNM	JRC	Suspension	Ag	*	*	89.8	Tween	9005-70-3	8% (4% each)	*	15	Below 20	*	*	TEM	*	Spheroidal	*	*	*	*	TEM	5	*	MilliQ Water and 10.2% of Ag in suspension	Ultrasonic bath	52.31	Mean	NTA	*	*	*	*	*	Solid	Natural media	RefeSol 01A	Dark	*
882	SR	Article	Soil	Hund-Rinke	2019	10.3109/17435390.2015.1054909	Evaluation of microbrial shifts caused by a silver nanomaterial: comparison of four test systems	Hund-Rinke et al 2019. Evaluation of microbrial shifts caused by a silver nanomaterial: comparison of four test systems. Environmental Sciences Europe, 31, 86	NM300K	AgNM	JRC	Suspension	Ag	*	*	89.8	Tween	9005-70-3	8% (4% each)	*	15	Below 20	*	*	TEM	*	Spheroidal	*	*	*	*	TEM	5	*	MilliQ Water and 10.2% of Ag in suspension	Ultrasonic bath	52.31	Mean	NTA	*	*	*	*	*	Solid	Natural media	RefeSol 01A	Dark	*
883	SR	Article	Soil	Hund-Rinke	2019	10.3109/17435390.2015.1054909	Evaluation of microbrial shifts caused by a silver nanomaterial: comparison of four test systems	Hund-Rinke et al 2019. Evaluation of microbrial shifts caused by a silver nanomaterial: comparison of four test systems. Environmental Sciences Europe, 31, 86	NM300K	AgNM	JRC	Suspension	Ag	*	*	89.8	Tween	9005-70-3	8% (4% each)	*	15	Below 20	*	*	TEM	*	Spheroidal	*	*	*	*	TEM	5	*	MilliQ Water and 10.2% of Ag in suspension	Ultrasonic bath	52.31	Mean	NTA	*	*	*	*	*	Solid	Natural media	RefeSol 01A	Dark	*
884	SR	Article	Soil	Hund-Rinke	2019	10.3109/17435390.2015.1054909	Evaluation of microbrial shifts caused by a silver nanomaterial: comparison of four test systems	Hund-Rinke et al 2019. Evaluation of microbrial shifts caused by a silver nanomaterial: comparison of four test systems. Environmental Sciences Europe, 31, 86	NM300K	AgNM	JRC	Suspension	Ag	*	*	89.8	Tween	9005-70-3	8% (4% each)	*	15	Below 20	*	*	TEM	*	Spheroidal	*	*	*	*	TEM	5	*	MilliQ Water and 10.2% of Ag in suspension	Ultrasonic bath	52.31	Mean	NTA	*	*	*	*	*	Solid	Natural media	RefeSol 01A	Dark	*
885	SR	Article	Soil	Hund-Rinke	2019	10.3109/17435390.2015.1054909	Evaluation of microbrial shifts caused by a silver nanomaterial: comparison of four test systems	Hund-Rinke et al 2019. Evaluation of microbrial shifts caused by a silver nanomaterial: comparison of four test systems. Environmental Sciences Europe, 31, 86	NM300K	AgNM	JRC	Suspension	Ag	*	*	89.8	Tween	9005-70-3	8% (4% each)	*	15	Below 20	*	*	TEM	*	Spheroidal	*	*	*	*	TEM	5	*	MilliQ Water and 10.2% of Ag in suspension	Ultrasonic bath	52.31	Mean	NTA	*	*	*	*	*	Solid	Natural media	RefeSol 01A	Dark	*
887	SR	Article	Soil	Hund-Rinke	2019	10.3109/17435390.2015.1054909	Evaluation of microbrial shifts caused by a silver nanomaterial: comparison of four test systems	Hund-Rinke et al 2019. Evaluation of microbrial shifts caused by a silver nanomaterial: comparison of four test systems. Environmental Sciences Europe, 31, 86	NM300K	AgNM	JRC	Suspension	Ag	*	*	89.8	Tween	9005-70-3	8% (4% each)	*	15	Below 20	*	*	TEM	*	Spheroidal	*	*	*	*	TEM	5	*	MilliQ Water and 10.2% of Ag in suspension	Ultrasonic bath	52.31	Mean	NTA	*	*	*	*	*	Solid	Natural media	RefeSol 01A	Dark	*
888	SR	Article	Soil	Hund-Rinke	2019	10.3109/17435390.2015.1054909	Evaluation of microbrial shifts caused by a silver nanomaterial: comparison of four test systems	Hund-Rinke et al 2019. Evaluation of microbrial shifts caused by a silver nanomaterial: comparison of four test systems. Environmental Sciences Europe, 31, 86	NM300K	AgNM	JRC	Suspension	Ag	*	*	89.8	Tween	9005-70-3	8% (4% each)	*	15	Below 20	*	*	TEM	*	Spheroidal	*	*	*	*	TEM	5	*	MilliQ Water and 10.2% of Ag in suspension	Ultrasonic bath	52.31	Mean	NTA	*	*	*	*	*	Solid	Natural media	RefeSol 01A	Dark	*
890	SR	Article	Soil	Hund-Rinke	2019	10.3109/17435390.2015.1054909	Evaluation of microbrial shifts caused by a silver nanomaterial: comparison of four test systems	Hund-Rinke et al 2019. Evaluation of microbrial shifts caused by a silver nanomaterial: comparison of four test systems. Environmental Sciences Europe, 31, 86	NM300K	AgNM	JRC	Suspension	Ag	*	*	89.8	Tween	9005-70-3	8% (4% each)	*	15	Below 20	*	*	TEM	*	Spheroidal	*	*	*	*	TEM	5	*	MilliQ Water and 10.2% of Ag in suspension	Ultrasonic bath	52.31	Mean	NTA	*	*	*	*	*	Solid	Natural media	RefeSol 01A	Dark	*
891	SR	Article	Soil	Hund-Rinke	2019	10.3109/17435390.2015.1054909	Evaluation of microbrial shifts caused by a silver nanomaterial: comparison of four test systems	Hund-Rinke et al 2019. Evaluation of microbrial shifts caused by a silver nanomaterial: comparison of four test systems. Environmental Sciences Europe, 31, 86	NM300K	AgNM	JRC	Suspension	Ag	*	*	89.8	Tween	9005-70-3	8% (4% each)	*	15	Below 20	*	*	TEM	*	Spheroidal	*	*	*	*	TEM	5	*	MilliQ Water and 10.2% of Ag in suspension	Ultrasonic bath	52.31	Mean	NTA	*	*	*	*	*	Solid	Natural media	RefeSol 01A	Dark	*
893	SR	Article	Soil	Hund-Rinke	2019	10.3109/17435390.2015.1054909	Evaluation of microbrial shifts caused by a silver nanomaterial: comparison of four test systems	Hund-Rinke et al 2019. Evaluation of microbrial shifts caused by a silver nanomaterial: comparison of four test systems. Environmental Sciences Europe, 31, 86	NM300K	AgNM	JRC	Suspension	Ag	*	*	89.8	Tween	9005-70-3	8% (4% each)	*	15	Below 20	*	*	TEM	*	Spheroidal	*	*	*	*	TEM	5	*	MilliQ Water and 10.2% of Ag in suspension	Ultrasonic bath	52.31	Mean	NTA	*	*	*	*	*	Solid	Natural media	RefeSol 01A	Dark	*
895	SR	Article	Soil	Hund-Rinke	2019	10.3109/17435390.2015.1054909	Evaluation of microbrial shifts caused by a silver nanomaterial: comparison of four test systems	Hund-Rinke et al 2019. Evaluation of microbrial shifts caused by a silver nanomaterial: comparison of four test systems. Environmental Sciences Europe, 31, 86	NM300K	AgNM	JRC	Suspension	Ag	*	*	89.8	Tween	9005-70-3	8% (4% each)	*	15	Below 20	*	*	TEM	*	Spheroidal	*	*	*	*	TEM	5	*	MilliQ Water and 10.2% of Ag in suspension	Ultrasonic bath	52.31	Mean	NTA	*	*	*	*	*	Solid	Natural media	RefeSol 01A	Dark	*
896	SR	Article	Soil	Hund-Rinke	2019	10.3109/17435390.2015.1054909	Evaluation of microbrial shifts caused by a silver nanomaterial: comparison of four test systems	Hund-Rinke et al 2019. Evaluation of microbrial shifts caused by a silver nanomaterial: comparison of four test systems. Environmental Sciences Europe, 31, 86	NM300K	AgNM	JRC	Suspension	Ag	*	*	89.8	Tween	9005-70-3	8% (4% each)	*	15	Below 20	*	*	TEM	*	Spheroidal	*	*	*	*	TEM	5	*	MilliQ Water and 10.2% of Ag in suspension	Ultrasonic bath	52.31	Mean	NTA	*	*	*	*	*	Solid	Natural media	RefeSol 01A	Dark	*
898	SR	Article	Soil	Hund-Rinke	2019	10.3109/17435390.2015.1054909	Evaluation of microbrial shifts caused by a silver nanomaterial: comparison of four test systems	Hund-Rinke et al 2019. Evaluation of microbrial shifts caused by a silver nanomaterial: comparison of four test systems. Environmental Sciences Europe, 31, 86	NM300K	AgNM	JRC	Suspension	Ag	*	*	89.8	Tween	9005-70-3	8% (4% each)	*	15	Below 20	*	*	TEM	*	Spheroidal	*	*	*	*	TEM	5	*	MilliQ Water and 10.2% of Ag in suspension	Ultrasonic bath	52.31	Mean	NTA	*	*	*	*	*	Solid	Natural media	RefeSol 01A	Dark	*
899	SR	Article	Soil	Hund-Rinke	2019	10.3109/17435390.2015.1054909	Evaluation of microbrial shifts caused by a silver nanomaterial: comparison of four test systems	Hund-Rinke et al 2019. Evaluation of microbrial shifts caused by a silver nanomaterial: comparison of four test systems. Environmental Sciences Europe, 31, 86	NM300K	AgNM	JRC	Suspension	Ag	*	*	89.8	Tween	9005-70-3	8% (4% each)	*	15	Below 20	*	*	TEM	*	Spheroidal	*	*	*	*	TEM	5	*	MilliQ Water and 10.2% of Ag in suspension	Ultrasonic bath	52.31	Mean	NTA	*	*	*	*	*	Solid	Natural media	RefeSol 01A	Dark	*
901	SR	Article	Soil	Hund-Rinke	2019	10.3109/17435390.2015.1054909	Evaluation of microbrial shifts caused by a silver nanomaterial: comparison of four test systems	Hund-Rinke et al 2019. Evaluation of microbrial shifts caused by a silver nanomaterial: comparison of four test systems. Environmental Sciences Europe, 31, 86	NM300K	AgNM	JRC	Suspension	Ag	*	*	89.8	Tween	9005-70-3	8% (4% each)	*	15	Below 20	*	*	TEM	*	Spheroidal	*	*	*	*	TEM	5	*	MilliQ Water and 10.2% of Ag in suspension	Ultrasonic bath	52.31	Mean	NTA	*	*	*	*	*	Solid	Natural media	RefeSol 01A	Dark	*
903	SR	Article	Soil	Hund-Rinke	2019	10.3109/17435390.2015.1054909	Evaluation of microbrial shifts caused by a silver nanomaterial: comparison of four test systems	Hund-Rinke et al 2019. Evaluation of microbrial shifts caused by a silver nanomaterial: comparison of four test systems. Environmental Sciences Europe, 31, 86	NM300K	AgNM	JRC	Suspension	Ag	*	*	89.8	Tween	9005-70-3	8% (4% each)	*	15	Below 20	*	*	TEM	*	Spheroidal	*	*	*	*	TEM	5	*	MilliQ Water and 10.2% of Ag in suspension	Ultrasonic bath	52.31	Mean	NTA	*	*	*	*	*	Solid	Natural media	RefeSol 01A	Dark	*
904	SR	Article	Soil	Hund-Rinke	2019	10.3109/17435390.2015.1054909	Evaluation of microbrial shifts caused by a silver nanomaterial: comparison of four test systems	Hund-Rinke et al 2019. Evaluation of microbrial shifts caused by a silver nanomaterial: comparison of four test systems. Environmental Sciences Europe, 31, 86	NM300K	AgNM	JRC	Suspension	Ag	*	*	89.8	Tween	9005-70-3	8% (4% each)	*	15	Below 20	*	*	TEM	*	Spheroidal	*	*	*	*	TEM	5	*	MilliQ Water and 10.2% of Ag in suspension	Ultrasonic bath	52.31	Mean	NTA	*	*	*	*	*	Solid	Natural media	RefeSol 01A	Dark	*
906	SR	Article	Soil	Hund-Rinke	2019	10.3109/17435390.2015.1054909	Evaluation of microbrial shifts caused by a silver nanomaterial: comparison of four test systems	Hund-Rinke et al 2019. Evaluation of microbrial shifts caused by a silver nanomaterial: comparison of four test systems. Environmental Sciences Europe, 31, 86	NM300K	AgNM	JRC	Suspension	Ag	*	*	89.8	Tween	9005-70-3	8% (4% each)	*	15	Below 20	*	*	TEM	*	Spheroidal	*	*	*	*	TEM	5	*	MilliQ Water and 10.2% of Ag in suspension	Ultrasonic bath	52.31	Mean	NTA	*	*	*	*	*	Solid	Natural media	RefeSol 01A	Dark	*
908	SR	Article	Soil	Hund-Rinke	2019	10.3109/17435390.2015.1054909	Evaluation of microbrial shifts caused by a silver nanomaterial: comparison of four test systems	Hund-Rinke et al 2019. Evaluation of microbrial shifts caused by a silver nanomaterial: comparison of four test systems. Environmental Sciences Europe, 31, 86	NM300K	AgNM	JRC	Suspension	Ag	*	*	89.8	Tween	9005-70-3	8% (4% each)	*	15	Below 20	*	*	TEM	*	Spheroidal	*	*	*	*	TEM	5	*	MilliQ Water and 10.2% of Ag in suspension	Ultrasonic bath	52.31	Mean	NTA	*	*	*	*	*	Solid	Natural media	RefeSol 01A	Dark	*
910	SR	Article	Soil	Hund-Rinke	2019	10.3109/17435390.2015.1054909	Evaluation of microbrial shifts caused by a silver nanomaterial: comparison of four test systems	Hund-Rinke et al 2019. Evaluation of microbrial shifts caused by a silver nanomaterial: comparison of four test systems. Environmental Sciences Europe, 31, 86	NM300K	AgNM	JRC	Suspension	Ag	*	*	89.8	Tween	9005-70-3	8% (4% each)	*	15	Below 20	*	*	TEM	*	Spheroidal	*	*	*	*	TEM	5	*	MilliQ Water and 10.2% of Ag in suspension	Ultrasonic bath	52.31	Mean	NTA	*	*	*	*	*	Solid	Natural media	RefeSol 01A	Dark	*
912	SR	Article	Soil	Hund-Rinke	2019	10.3109/17435390.2015.1054909	Evaluation of microbrial shifts caused by a silver nanomaterial: comparison of four test systems	Hund-Rinke et al 2019. Evaluation of microbrial shifts caused by a silver nanomaterial: comparison of four test systems. Environmental Sciences Europe, 31, 86	NM300K	AgNM	JRC	Suspension	Ag	*	*	89.8	Tween	9005-70-3	8% (4% each)	*	15	Below 20	*	*	TEM	*	Spheroidal	*	*	*	*	TEM	5	*	MilliQ Water and 10.2% of Ag in suspension	Ultrasonic bath	52.31	Mean	NTA	*	*	*	*	*	Solid	Natural media	RefeSol 01A	Dark	*
913	SR	Article	Soil	Hund-Rinke	2019	10.3109/17435390.2015.1054909	Evaluation of microbrial shifts caused by a silver nanomaterial: comparison of four test systems	Hund-Rinke et al 2019. Evaluation of microbrial shifts caused by a silver nanomaterial: comparison of four test systems. Environmental Sciences Europe, 31, 86	NM300K	AgNM	JRC	Suspension	Ag	*	*	89.8	Tween	9005-70-3	8% (4% each)	*	15	Below 20	*	*	TEM	*	Spheroidal	*	*	*	*	TEM	5	*	MilliQ Water and 10.2% of Ag in suspension	Ultrasonic bath	52.31	Mean	NTA	*	*	*	*	*	Solid	Natural media	RefeSol 01A	Dark	*
915	SR	Article	Soil	Schlich	2015	10.1016/j.envpol.2014.10.021	Influence of soil properties on the effect of silver nanomaterials on microbial activity in five soils	Schlich et al 2015. Influence of soil properties on the effect of silver nanomaterials on microbial activity in five soils. Environmental Pollution, 196, 321-330	NM300K	AgNM	JRC	Suspension	Ag	*	*	89.8	Tween	9005-70-3	8% (4% each)	*	15	Below 20	*	*	TEM	*	Spheroidal	*	*	*	*	TEM	5	*	MilliQ Water and 10.2% of Ag in suspension	*	52.31	Mean	NTA	*	*	*	*	*	Solid	Artificial	RefeSol 01A	Dark	*
919	SR	Article	Soil	Schlich	2015	10.1016/j.envpol.2014.10.021	Influence of soil properties on the effect of silver nanomaterials on microbial activity in five soils	Schlich et al 2015. Influence of soil properties on the effect of silver nanomaterials on microbial activity in five soils. Environmental Pollution, 196, 321-330	AgNO3		Merck KGaA	*	Ag	7761-88-8	*	*	*	*	*	*	Unreported	Unreported	*	*	*	*	*	*	*	*	*	*	*	*	*	*	*	*	*	*	*	*	*	*	Solid	Artificial	RefeSol 02A	Dark	*
922	SR	Article	Soil	Schlich	2015	10.1016/j.envpol.2014.10.021	Influence of soil properties on the effect of silver nanomaterials on microbial activity in five soils	Schlich et al 2015. Influence of soil properties on the effect of silver nanomaterials on microbial activity in five soils. Environmental Pollution, 196, 321-330	NM300K	AgNM	JRC	Suspension	Ag	*	*	89.8	Tween	9005-70-3	8% (4% each)	*	15	Below 20	*	*	TEM	*	Spheroidal	*	*	*	*	TEM	5	*	MilliQ Water and 10.2% of Ag in suspension	*	52.31	Mean	NTA	*	*	*	*	*	Solid	Artificial	RefeSol 04A	Dark	*
923	SR	Article	Soil	Schlich	2015	10.1016/j.envpol.2014.10.021	Influence of soil properties on the effect of silver nanomaterials on microbial activity in five soils	Schlich et al 2015. Influence of soil properties on the effect of silver nanomaterials on microbial activity in five soils. Environmental Pollution, 196, 321-330	AgNO3		Merck KGaA	*	Ag	7761-88-8	*	*	*	*	*	*	Unreported	Unreported	*	*	*	*	*	*	*	*	*	*	*	*	*	*	*	*	*	*	*	*	*	*	Solid	Artificial	RefeSol 04A	Dark	*
927	SR	Article	Soil	Schlich	2015	10.1016/j.envpol.2014.10.021	Influence of soil properties on the effect of silver nanomaterials on microbial activity in five soils	Schlich et al 2015. Influence of soil properties on the effect of silver nanomaterials on microbial activity in five soils. Environmental Pollution, 196, 321-330	AgNO3		Merck KGaA	*	Ag	7761-88-8	*	*	*	*	*	*	Unreported	Unreported	*	*	*	*	*	*	*	*	*	*	*	*	*	*	*	*	*	*	*	*	*	*	Solid	Artificial	RefeSol 03G	Dark	*
928	SR	Article	Soil	Schlich	2015	10.1016/j.envpol.2014.10.021	Influence of soil properties on the effect of silver nanomaterials on microbial activity in five soils	Schlich et al 2015. Influence of soil properties on the effect of silver nanomaterials on microbial activity in five soils. Environmental Pollution, 196, 321-330	NM300K	AgNM	JRC	Suspension	Ag	*	*	89.8	Tween	9005-70-3	8% (4% each)	*	15	Below 20	*	*	TEM	*	Spheroidal	*	*	*	*	TEM	5	*	MilliQ Water and 10.2% of Ag in suspension	*	52.31	Mean	NTA	*	*	*	*	*	Solid	Artificial	RefeSol 05G	Dark	*
930	SR	Article	Soil	Schlich	2015	10.1016/j.envpol.2014.10.021	Influence of soil properties on the effect of silver nanomaterials on microbial activity in five soils	Schlich et al 2015. Influence of soil properties on the effect of silver nanomaterials on microbial activity in five soils. Environmental Pollution, 196, 321-330	AgNO3		Merck KGaA	*	Ag	7761-88-8	*	*	*	*	*	*	Unreported	Unreported	*	*	*	*	*	*	*	*	*	*	*	*	*	*	*	*	*	*	*	*	*	*	Solid	Artificial	RefeSol 05G	Dark	*
932	SR	Article	Soil	Schlich	2015	10.1016/j.envpol.2014.10.021	Influence of soil properties on the effect of silver nanomaterials on microbial activity in five soils	Schlich et al 2015. Influence of soil properties on the effect of silver nanomaterials on microbial activity in five soils. Environmental Pollution, 196, 321-330	NM300K	AgNM	JRC	Suspension	Ag	*	*	89.8	Tween	9005-70-3	8% (4% each)	*	15	Below 20	*	*	TEM	*	Spheroidal	*	*	*	*	TEM	5	*	MilliQ Water and 10.2% of Ag in suspension	*	52.31	Mean	NTA	*	*	*	*	*	Solid	Artificial	RefeSol 01A	Dark	*
934	SR	Article	Soil	Schlich	2015	10.1016/j.envpol.2014.10.021	Influence of soil properties on the effect of silver nanomaterials on microbial activity in five soils	Schlich et al 2015. Influence of soil properties on the effect of silver nanomaterials on microbial activity in five soils. Environmental Pollution, 196, 321-330	NM300K	AgNM	JRC	Suspension	Ag	*	*	89.8	Tween	9005-70-3	8% (4% each)	*	15	Below 20	*	*	TEM	*	Spheroidal	*	*	*	*	TEM	5	*	MilliQ Water and 10.2% of Ag in suspension	*	52.31	Mean	NTA	*	*	*	*	*	Solid	Artificial	RefeSol 01A	Dark	*
936	SR	Article	Soil	Schlich	2015	10.1016/j.envpol.2014.10.021	Influence of soil properties on the effect of silver nanomaterials on microbial activity in five soils	Schlich et al 2015. Influence of soil properties on the effect of silver nanomaterials on microbial activity in five soils. Environmental Pollution, 196, 321-330	AgNO3		Merck KGaA	*	Ag	7761-88-8	*	*	*	*	*	*	Unreported	Unreported	*	*	*	*	*	*	*	*	*	*	*	*	*	*	*	*	*	*	*	*	*	*	Solid	Artificial	RefeSol 01A	Dark	*
938	SR	Article	Soil	Schlich	2015	10.1016/j.envpol.2014.10.021	Influence of soil properties on the effect of silver nanomaterials on microbial activity in five soils	Schlich et al 2015. Influence of soil properties on the effect of silver nanomaterials on microbial activity in five soils. Environmental Pollution, 196, 321-330	AgNO3		Merck KGaA	*	Ag	7761-88-8	*	*	*	*	*	*	Unreported	Unreported	*	*	*	*	*	*	*	*	*	*	*	*	*	*	*	*	*	*	*	*	*	*	Solid	Artificial	RefeSol 01A	Dark	*
940	SR	Article	Soil	Schlich	2015	10.1016/j.envpol.2014.10.021	Influence of soil properties on the effect of silver nanomaterials on microbial activity in five soils	Schlich et al 2015. Influence of soil properties on the effect of silver nanomaterials on microbial activity in five soils. Environmental Pollution, 196, 321-330	NM300K	AgNM	JRC	Suspension	Ag	*	*	89.8	Tween	9005-70-3	8% (4% each)	*	15	Below 20	*	*	TEM	*	Spheroidal	*	*	*	*	TEM	5	*	MilliQ Water and 10.2% of Ag in suspension	*	52.31	Mean	NTA	*	*	*	*	*	Solid	Artificial	RefeSol 02A	Dark	*
943	SR	Article	Soil	Schlich	2015	10.1016/j.envpol.2014.10.021	Influence of soil properties on the effect of silver nanomaterials on microbial activity in five soils	Schlich et al 2015. Influence of soil properties on the effect of silver nanomaterials on microbial activity in five soils. Environmental Pollution, 196, 321-330	AgNO3		Merck KGaA	*	Ag	7761-88-8	*	*	*	*	*	*	Unreported	Unreported	*	*	*	*	*	*	*	*	*	*	*	*	*	*	*	*	*	*	*	*	*	*	Solid	Artificial	RefeSol 02A	Dark	*
945	SR	Article	Soil	Schlich	2015	10.1016/j.envpol.2014.10.021	Influence of soil properties on the effect of silver nanomaterials on microbial activity in five soils	Schlich et al 2015. Influence of soil properties on the effect of silver nanomaterials on microbial activity in five soils. Environmental Pollution, 196, 321-330	NM300K	AgNM	JRC	Suspension	Ag	*	*	89.8	Tween	9005-70-3	8% (4% each)	*	15	Below 20	*	*	TEM	*	Spheroidal	*	*	*	*	TEM	5	*	MilliQ Water and 10.2% of Ag in suspension	*	52.31	Mean	NTA	*	*	*	*	*	Solid	Artificial	RefeSol 04A	Dark	*
947	SR	Article	Soil	Schlich	2015	10.1016/j.envpol.2014.10.021	Influence of soil properties on the effect of silver nanomaterials on microbial activity in five soils	Schlich et al 2015. Influence of soil properties on the effect of silver nanomaterials on microbial activity in five soils. Environmental Pollution, 196, 321-330	NM300K	AgNM	JRC	Suspension	Ag	*	*	89.8	Tween	9005-70-3	8% (4% each)	*	15	Below 20	*	*	TEM	*	Spheroidal	*	*	*	*	TEM	5	*	MilliQ Water and 10.2% of Ag in suspension	*	52.31	Mean	NTA	*	*	*	*	*	Solid	Artificial	RefeSol 04A	Dark	*
949	SR	Article	Soil	Schlich	2015	10.1016/j.envpol.2014.10.021	Influence of soil properties on the effect of silver nanomaterials on microbial activity in five soils	Schlich et al 2015. Influence of soil properties on the effect of silver nanomaterials on microbial activity in five soils. Environmental Pollution, 196, 321-330	AgNO3		Merck KGaA	*	Ag	7761-88-8	*	*	*	*	*	*	Unreported	Unreported	*	*	*	*	*	*	*	*	*	*	*	*	*	*	*	*	*	*	*	*	*	*	Solid	Artificial	RefeSol 04A	Dark	*
[truncated: 1,427 more rows]
[truncated: 54 more columns]
